# Supplementary material
Source: Research Square preprint supplement (doi:10.21203/rs.3.rs-9541548/v1)
Supplement: Supplementary file 1 [file 53d3c1e83a70a08f72b7fc84.xlsx]

## Sheet: Proteins
Red: Proteins of interests mentioned								Intensity [log2]																									iBAQ intensity [log2]
Representative protein	Leading proteins	Gene name	Protein name	Fasta header	Molecular weight [kDa]	Total peptides	Sequence coverage	aged0.4mg_1	aged0.4mg_2	aged0.4mg_3	aged0.4mg_4	aged0.4mg_5	aged2mg_1	aged2mg_2	aged2mg_3	aged2mg_4	aged2mg_5	agedPBS_1	agedPBS_2	agedPBS_3	agedPBS_4	agedPBS_5	aged_1	aged_2	aged_3	aged_4	aged_5	young_1	young_2	young_3	young_4	young_5	aged0.4mg_1	aged0.4mg_2	aged0.4mg_3	aged0.4mg_4	aged0.4mg_5	aged2mg_1	aged2mg_2	aged2mg_3	aged2mg_4	aged2mg_5	agedPBS_1	agedPBS_2	agedPBS_3	agedPBS_4	agedPBS_5	aged_1	aged_2
Q8BHL8	Q8BHL8	Psmf1	Proteasome inhibitor PI31 subunit	sp|Q8BHL8|PSMF1_MOUSE Proteasome inhibitor PI31 subunit OS=Mus musculus OX=10090 GN=Psmf1 PE=1 SV=1	29.65	2	7	15.6392	16.0669	15.9379	15.8083	16.0161	16.0224	15.6749	15.6167	15.8869	16.4579			15.7478	15.4664	15.7539		16.031	15.8466		14.0163	16.0576	15.7923	15.82	15.2749	16.1847	16.4212	16.8548	16.7144	16.5915	16.7948	16.8047	16.4623	16.4071	16.6739	17.2493			16.5418	16.2478	16.5486		16.8327
O88454	O88454	Kcnk4	Potassium channel subfamily K member 4	sp|O88454|KCNK4_MOUSE Potassium channel subfamily K member 4 OS=Mus musculus OX=10090 GN=Kcnk4 PE=1 SV=1	43.02	2	4.5	16.6934	16.7768	16.467	16.607	16.6246	16.7374	16.3786	16.7988	16.7374	17.1017	16.2634	16.6791		16.4338	16.7592	16.9085				16.3027			16.599		15.6201	17.4754	17.5647	17.2435	17.3902	17.4033	17.5197	17.166	17.5892	17.5244	17.8931	17.0636	17.5019		17.2153	17.5539	17.7202
A2AI05	A2AI05	Ndor1	NADPH-dependent diflavin oxidoreductase 1	sp|A2AI05|NDOR1_MOUSE NADPH-dependent diflavin oxidoreductase 1 OS=Mus musculus OX=10090 GN=Ndor1 PE=2 SV=1	67.14	2	5.9	15.8443	16.3849	15.8986		15.9031		15.9454	15.9093	15.8953	16.0955				16.087	15.9348				16.1195	15.6433		16.0203		15.8458	15.7157	15.3368	15.8833	15.3856		15.3924		15.4434	15.4101	15.3927	15.5974				15.579	15.4401
Q9D2Z4	Q9D2Z4	Senp8	Sentrin-specific protease 8	sp|Q9D2Z4|SENP8_MOUSE Sentrin-specific protease 8 OS=Mus musculus OX=10090 GN=Senp8 PE=1 SV=2	25.04	2	7.7	14.9565	15.1602	15.2736	18.1601	15.194	15.0188	14.9226	18.2114	14.7957	14.8916	14.8078		15.1913	14.5741	14.5534	14.437	14.9279	14.4949	14.4512		14.3354	15.2102	15.2192	15.1883	15.063	15.7385	15.948	16.0501	18.9433	15.9727	15.8011	15.71	19.0018	15.5827	15.6829	15.608		15.9853	15.3556	15.3482	15.2487	15.7296
A0A1Y7VJN6	A0A1Y7VJN6;contam_P03987;P03987	Ighg3	Immunoglobulin heavy constant gamma 3 (Fragment)	tr|A0A1Y7VJN6|A0A1Y7VJN6_MOUSE Immunoglobulin heavy constant gamma 3 (Fragment) OS=Mus musculus OX=10090 GN=Ighg3 PE=4 SV=1	43.87	4	10	14.4765	14.723		12.9554	14.59	14.2073	11.7534		17.1716	13.0613			15.3866					14.0975		11.7382	13.2009	12.3835	12.7692	11.8401	11.7947	14.2585	14.5109		12.7385	14.3687	13.9896	11.5408		16.9586	12.8526			15.1806
Q9Z0U0	Q9Z0U0	Xpr1	Solute carrier family 53 member 1	sp|Q9Z0U0|S53A1_MOUSE Solute carrier family 53 member 1 OS=Mus musculus OX=10090 GN=Xpr1 PE=1 SV=1	81.7	2	5	13.9962	13.84	13.9656	13.3641	13.6349	13.7493	13.7769	14.2865	13.318	13.7732			13.3535	13.209	13.8411	13.822	13.1762	13.6715			14.1524	13.8297	13.4073	13.5355	13.5425	12.9939	12.8436	12.9578	12.363	12.6294	12.7474	12.7801	13.2926	12.3208	12.7803			12.3633	12.2062	12.8516	12.8494	12.1935
Q9CYU6	Q9CYU6	Dph7	Diphthine methyltransferase	sp|Q9CYU6|DPH7_MOUSE Diphthine methyltransferase OS=Mus musculus OX=10090 GN=Dph7 PE=2 SV=1	53.17	2	5.2	14.8621	14.853	14.7506	14.9186	14.6172	14.495	14.3953	14.9193	14.697	14.8022			14.9003	14.6879		14.1856	14.3735	14.7752	13.8192	14.4211	14.4851	14.3577	14.6584		14.5682	14.4921	14.4889	14.3751	14.5498	14.244	14.1252	14.0307	14.5577	14.332	14.4415			14.5423	14.3174		13.8453	14.0231
Q9CQB5	Q9CQB5	Cisd2	CDGSH iron-sulfur domain-containing protein 2	sp|Q9CQB5|CISD2_MOUSE CDGSH iron-sulfur domain-containing protein 2 OS=Mus musculus OX=10090 GN=Cisd2 PE=1 SV=1	15.23	4	40		15.8519		16.0634	16.1709	15.9349	15.2744	15.1788	16.2789	16.1843	14.8848				16.0934	16.5927			15.5682	15.6377	16.3295			15.5296	15.0933		16.6398		16.8466	16.9497	16.7171	16.0619	15.9691	17.0659	16.9757	15.685				16.8882	17.4044
A0A075B5R2	A0A075B5R2	Ighv7-3	Immunoglobulin heavy variable 7-3 (Fragment)	tr|A0A075B5R2|A0A075B5R2_MOUSE Immunoglobulin heavy variable 7-3 (Fragment) OS=Mus musculus OX=10090 GN=Ighv7-3 PE=1 SV=2	13.45	2	18.3	15.0071	16.0842	13.8268	12.591	12.2578	13.1491	20.3055	15.2967	11.0597	13.1613	13.2027	11.8566	12.1747	11.1287			14.124	14.1102	16.0417	13.0187	12.6619	10.4063	11.886	11.6107	12.0676	16.637	17.7201	15.4513	14.2222	13.8845	14.7793	21.9409	16.935	12.6947	14.8007	14.8509	13.5274	13.8168	12.7582			15.7737
Q9Z1R4	Q9Z1R4	D17h6s53e	Uncharacterized protein C6orf47 homolog	sp|Q9Z1R4|CF047_MOUSE Uncharacterized protein C6orf47 homolog OS=Mus musculus OX=10090 GN=D17h6s53e PE=1 SV=1	31.99	2	7.2	14.2164	14.1685	14.6686	14.8257	14.5956	14.7273	14.1433	14.5176	14.8695	14.9132			14.3585	14.9467	14.691	13.9928	13.8729	14.0414		11.8992	14.7151	14.0583	14.6209	14.5747	14.0988	14.5834	14.5414	15.03	15.1939	14.9593	15.0945	14.5158	14.8929	15.2415	15.2895			14.7375	15.3132	15.0708	14.3894	14.2595
A0A0A6YYE7	A0A0A6YYE7	Igkv4-57	Immunoglobulin kappa variable 4-57 (Fragment)	tr|A0A0A6YYE7|A0A0A6YYE7_MOUSE Immunoglobulin kappa variable 4-57 (Fragment) OS=Mus musculus OX=10090 GN=Igkv4-57 PE=1 SV=2	12.68	2	27.4	13.3606	13.8129	13.2829	12.6812	14.7938	12.4718	16.0498	14.6923	16.1722	14.3595	11.4894	13.1868	13.6778			12.7457	15.0612	12.8348	12.1868	15.2906						14.7276	15.1857	14.6443	14.0494	16.1575	13.839	17.4222	16.0676	17.5442	15.7358	12.8746	14.5945	15.0568			14.1423	16.4478
Q8BT18	Q8BT18	Armh4	Armadillo-like helical domain-containing protein 4	sp|Q8BT18|ARMD4_MOUSE Armadillo-like helical domain-containing protein 4 OS=Mus musculus OX=10090 GN=Armh4 PE=1 SV=2	83.72	2	2.3	12.5465	12.3227	12.7		12.562	12.5144	12.3241	12.7675	12.8108	12.7924				12.5895	12.6504	12.6822		12.6873				12.9049		12.6423	13.0301	11.691	11.4732	11.8391		11.7033	11.6592	11.4741	11.9204	11.9604	11.9463				11.7336	11.8078	11.8565
Q64362	Q64362	Aktip	AKT-interacting protein	sp|Q64362|AKTIP_MOUSE AKT-interacting protein OS=Mus musculus OX=10090 GN=Aktip PE=1 SV=1	32.92	3	15.8	13.5441	13.8033	14.1536	14.0581	14.1033	12.9668		13.9843	14.0195	14.3695	12.9272	13.4029		13.8849		13.5868	13.4235	13.8297				13.7013	13.4066		14.4641	13.5892	13.8542	14.1931	14.1043	14.145	13.0121		14.0377	14.0695	14.4239	12.9904	13.4887		13.9294		13.6615	13.4882
Q792Z1	Q792Z1	Try10	trypsin	tr|Q792Z1|Q792Z1_MOUSE trypsin OS=Mus musculus OX=10090 GN=Try10 PE=1 SV=1	26.2	2	16.3	23.0931	18.5461	18.6881	18.2822	19.2154	18.7092	22.4527	17.983	19.0204	18.5723	16.2512	16.7338	17.8047	17.4834	17.6042	20.2142	20.5306	18.4283	18.0679	16.1873	19.2834	16.3926	16.3158	15.9914	16.1487	23.8751	19.334	19.4646	19.0654	19.9941	19.4915	23.2401	18.7733	19.8074	19.3637	17.0514	17.5566	18.5987	18.2649	18.399	21.0259	21.3323
Q8BGX0	Q8BGX0	Trim23	E3 ubiquitin-protein ligase TRIM23	sp|Q8BGX0|TRI23_MOUSE E3 ubiquitin-protein ligase TRIM23 OS=Mus musculus OX=10090 GN=Trim23 PE=2 SV=1	63.89	3	5.9	16.2662	16.2711	13.3932	13.8204	13.6208	13.736	13.0981	13.6407	13.0394		13.9013		13.7698		13.1338	14.5083	12.9843	12.7655		12.665	13.6033	13.4942	12.8155	13.8985	12.8921	15.5176	15.5285	12.6391	13.073	12.869	12.9878	12.355	12.9005	12.2959		13.171		13.0333		12.3981	13.7894	12.2554
Q8R5K2	Q8R5K2	Usp33	Ubiquitin carboxyl-terminal hydrolase 33	sp|Q8R5K2|UBP33_MOUSE Ubiquitin carboxyl-terminal hydrolase 33 OS=Mus musculus OX=10090 GN=Usp33 PE=1 SV=2	102.66	2	2.9	15.2071	15.4826	15.6491	15.0507	15.6913	15.3138		15.6954		15.8058	15.3699			15.3622	15.1687			15.1039	15.1652			15.3754	15.7456	15.1965	15.4535	13.6354	13.9168	14.072	13.4802	14.1164	13.7425		14.1321		14.2435	13.8164			13.79	13.6098
P62069	P62069	Usp46	Ubiquitin carboxyl-terminal hydrolase 46	sp|P62069|UBP46_MOUSE Ubiquitin carboxyl-terminal hydrolase 46 OS=Mus musculus OX=10090 GN=Usp46 PE=1 SV=1	42.42	2	5.5	14.9806	15.201	14.7951	14.6419	14.5317	14.8613	14.9405	14.8933	14.6157	14.6435	14.1781	14.3353	14.5369	14.2979	14.4155		14.4478		13.8939	13.8675	14.5201	14.738	14.2726	14.1581	14.3064	14.6846	14.9109	14.4936	14.3471	14.2324	14.5655	14.6499	14.6057	14.3247	14.3568	13.9003	14.08	14.2529	14.0014	14.1323		14.1714
A0A087WQ44	A0A087WQ44	Srcap	Snf2-related CREBBP activator protein	tr|A0A087WQ44|A0A087WQ44_MOUSE Snf2-related CREBBP activator protein OS=Mus musculus OX=10090 GN=Srcap PE=1 SV=1	349.05	2	1.1	14.7776	14.6557	14.8149	14.8773			13.858	14.6064	14.0012	14.7477			13.7108	14.4579	13.562		14.1264		14.2537	13.9264	14.6769	14.4278	14.1064	13.5806		12.1597	12.0436	12.1914	12.2606			11.2455	11.9968	11.3883	12.1391			11.1049	11.8394	10.9568		11.5281
P17665	P17665	Cox7c	Cytochrome c oxidase subunit 7C, mitochondrial	sp|P17665|COX7C_MOUSE Cytochrome c oxidase subunit 7C, mitochondrial OS=Mus musculus OX=10090 GN=Cox7c PE=1 SV=1	7.33	2	28.6	21.9135	22.2904	21.6381	21.6103	21.5393	21.5127	21.681	21.9965	21.7984	21.7316	21.5226	21.5631	22.0138	20.9502	21.6009	21.3187	21.5204	21.4791	21.48		21.4506	21.6672	21.4023	21.2462	21.7056	23.5435	23.9263	23.2626	23.2415	23.1661	23.143	23.3164	23.6348	23.4334	23.371	23.1708	23.2339	23.6558	22.5797	23.2437	22.9784	23.17
E9Q5G2	E9Q5G2;Q8CDY9	Pcdhb9	Protocadherin beta 9	tr|E9Q5G2|E9Q5G2_MOUSE Protocadherin beta 9 OS=Mus musculus OX=10090 GN=Pcdhb9 PE=1 SV=1	91.24	2	3.3	14.2329	15.4494	14.5034	14.3844	14.4274	14.2635	14.9476	15.8199	14.9809	15.1864	13.9258	11.7505		11.7548	14.189	14.5215	14.2295	14.0214	13.969	14.0043	13.3561	13.7083	13.2193	13.2274	13.0302	13.2779	14.5003	13.543	13.4306	13.4692	13.3088	13.9981	14.8732	14.0309	14.2408	12.989	10.8363		10.7993	13.2469	13.5962	13.2942
Q9D1C3	Q9D1C3	Pyurf	Protein preY, mitochondrial	sp|Q9D1C3|PREY_MOUSE Protein preY, mitochondrial OS=Mus musculus OX=10090 GN=Pyurf PE=1 SV=1	12.5	2	47.3	12.7911	12.7674	13.0494	14.2892	13.0224	13.2198	13.0917	13.7238	13.3677	13.1486			13.035	13.6145	13.1289	12.3605		12.8257		12.8878		13.3608	12.6396	13.2125	13.2416	14.158	14.1403	14.4109	15.6574	14.3861	14.587	14.4641	15.0991	14.7397	14.5249			14.414	14.9809	14.5087	13.7571
Q8CFA2	Q8CFA2	Amt	Aminomethyltransferase, mitochondrial	sp|Q8CFA2|GCST_MOUSE Aminomethyltransferase, mitochondrial OS=Mus musculus OX=10090 GN=Amt PE=1 SV=1	43.98	2	4.7	13.9117	14.1219	14.6756	14.8398	15.0518			13.5317	14.5517	15.0877		13.9629		14.7513	14.7958	13.6206		14.1937	14.1237				14.2257	14.0981		13.4713	13.6874	14.2297	14.4006	14.6081			13.0996	14.1163	14.6567		13.5633		14.3104	14.3681	13.2099
A0A991ENW0	A0A991ENW0	H1f10	H1.10 linker histone	tr|A0A991ENW0|A0A991ENW0_MOUSE H1.10 linker histone OS=Mus musculus OX=10090 GN=H1f10 PE=1 SV=1	25.49	2	8.8	12.8795	13.0699	14.269	14.558	14.2359	13.6333	13.5179	13.6244	14.4298	14.5038	11.6534	11.202	13.6258	14.6153	14.3478	12.5295	12.5953		13.2055	12.3133	13.8032	12.7015	14.9971	13.3591	12.6306	13.2465	13.4427	14.6305	14.9262	14.5996	14.0006	13.8903	13.9997	14.8017	14.8801	12.0385	11.6097	14.0048	14.9818	14.7275	12.9262	12.9819
Q9Z2A7	Q9Z2A7	Dgat1	Diacylglycerol O-acyltransferase 1	sp|Q9Z2A7|DGAT1_MOUSE Diacylglycerol O-acyltransferase 1 OS=Mus musculus OX=10090 GN=Dgat1 PE=1 SV=1	56.75	2	8.6	14.7616	14.7111	15.227	14.8912	15.1414	14.2643	14.1669	14.9348	14.5984	15.2239	14.4666	14.5679	14.5873	14.8792	14.8604	14.0738		13.9279		14.8329	14.2753	14.1622	14.2055	14.3473	14.2561	14.626	14.5815	15.0859	14.7569	15.0026	14.129	14.0368	14.8075	14.4679	15.0977	14.3493	14.4731	14.4638	14.7431	14.7377	13.968
Q78IK2	Q78IK2	Atp5mk	ATP synthase membrane subunit K, mitochondrial	sp|Q78IK2|ATPMK_MOUSE ATP synthase membrane subunit K, mitochondrial OS=Mus musculus OX=10090 GN=Atp5mk PE=1 SV=1	6.38	2	43.1	21.5307	21.4432	21.5379	21.458	21.4744	21.3404	21.4374	21.7218	21.6338	21.7755	21.035		21.5087	21.5084	21.554	21.4971	21.4948	21.5867	21.4517	21.2656	21.3746	21.666	21.6035	21.6421	21.8948	23.8977	23.8161	23.8994	23.8261	23.8381	23.7077	23.8098	24.0971	24.0058	24.1518	23.4202		23.8877	23.8748	23.9338	23.8938	23.8814
P15920	P15920	Atp6v0a2	V-type proton ATPase 116 kDa subunit a 2	sp|P15920|VPP2_MOUSE V-type proton ATPase 116 kDa subunit a 2 OS=Mus musculus OX=10090 GN=Atp6v0a2 PE=1 SV=2	98.08	2	2.8	14.1246	13.8498	14.5615	14.11	14.1068	14.0509	13.1129	14.1247	14.274	14.1382			14.1011	14.3043	14.2009		13.8434	13.9857	14.2105	13.8876	14.4732	14.1083		14.1627	14.1186	12.6842	12.4153	13.1156	12.6708	12.6631	12.6108	11.678	12.6926	12.8386	12.7072			12.6727	12.8633	12.7732		12.4226
A0A1Y7VMP7	A0A1Y7VMP7	Mlh3	MutL homolog 3	tr|A0A1Y7VMP7|A0A1Y7VMP7_MOUSE MutL homolog 3 OS=Mus musculus OX=10090 GN=Mlh3 PE=1 SV=1	162.42	2	4.7	12.6407		12.7738	12.9089	11.7094	11.9596	12.7939			12.7653				12.7031	11.5844	12.4738							13.3365		12.7814	10.3072		10.4348	10.5766	9.37267	9.62638	10.4659			10.4412				10.3691	9.26371	10.1701
Q9D8B4	Q9D8B4	Ndufa11	NADH dehydrogenase [ubiquinone] 1 alpha subcomplex subunit 11	sp|Q9D8B4|NDUAB_MOUSE NADH dehydrogenase [ubiquinone] 1 alpha subcomplex subunit 11 OS=Mus musculus OX=10090 GN=Ndufa11 PE=1 SV=2	14.97	2	19.1	18.1659	18.3346	18.4206	19.3086	17.702	18.0202	18.6867	19.5092	19.1824	18.6525		17.1242	17.8425	19.1767	18.8522	18.8425	17.7132	19.4772	17.2653	17.2328	18.5515	18.2899	18.6069	19.012	19.6034	19.3105	19.4851	19.5596	20.4543	18.8433	19.165	19.8367	20.6621	20.332	19.8065		18.3096	18.9991	20.3208	20.0095	20.0167	18.8775
Q80TN5	Q80TN5	Zdhhc17	Palmitoyltransferase ZDHHC17	sp|Q80TN5|ZDH17_MOUSE Palmitoyltransferase ZDHHC17 OS=Mus musculus OX=10090 GN=Zdhhc17 PE=1 SV=2	72.57	4	8.1	14.7122	14.7825	14.9562	14.8151	15.1078	14.7576	14.5017	14.8267	15.1476	15.2686			14.6265	15.03	14.9763	14.7175	14.4554	15.0995	14.4523	14.3811	14.6763	14.7801	15.0181	15.0171	15.0307	13.9636	14.0399	14.2022	14.0677	14.356	14.0094	13.7586	14.0865	14.4041	14.5294			13.89	14.281	14.2405	13.9987	13.7266
Q8CG73	Q8CG73	Rpgrip1l	Protein fantom	sp|Q8CG73|FTM_MOUSE Protein fantom OS=Mus musculus OX=10090 GN=Rpgrip1l PE=1 SV=2	144.91	3	2.2	14.318	14.2699	14.3757	13.6814	14.4818	13.6528	13.6665	14.321	14.3496	14.1776			14.0693	14.0582	14.043	13.464	13.7426	13.5945	12.8213	13.4153	13.3775	13.6754	13.7889	13.5414	14.1758	12.2926	12.2504	12.3448	11.6573	12.4532	11.6277	11.6466	12.3039	12.3293	12.1616			12.0559	12.0323	12.0304	11.4683	11.7369
Q80YS6	Q80YS6	Afap1	Actin filament-associated protein 1	sp|Q80YS6|AFAP1_MOUSE Actin filament-associated protein 1 OS=Mus musculus OX=10090 GN=Afap1 PE=1 SV=1	80.56	2	2.7	11.589		12.3452	12.1119		12.6486			12.2248	11.5527		11.8158								11.899	11.8966	13.6451	12.2827		12.1928	10.786		11.5367	11.3101		11.8459			11.4268	10.7592		11.0536
P36895	P36895	Bmpr1a	Bone morphogenetic protein receptor type-1A	sp|P36895|BMR1A_MOUSE Bone morphogenetic protein receptor type-1A OS=Mus musculus OX=10090 GN=Bmpr1a PE=1 SV=1	60.02	3	7.1	13.8181	14.0423	13.6548	13.7505	13.7026	13.5695	13.4389	14.2008	13.5892	14.1094		13.8102	13.6387	13.66		13.8374	13.6222	13.8632	13.77		13.7131	13.7938	13.9662	13.775	13.9386	13.2464	13.4765	13.0776	13.1801	13.1277	12.9982	12.8727	13.6375	13.0225	13.5471		13.2794	13.0791	13.0878		13.2955	13.0702
Q8VI24	Q8VI24	Satb2	DNA-binding protein SATB2	sp|Q8VI24|SATB2_MOUSE DNA-binding protein SATB2 OS=Mus musculus OX=10090 GN=Satb2 PE=1 SV=1	82.51	5	6.7	13.0717	12.5629	11.8661	12.9193	13.4147	12.8465	12.3077	13.7258	12.9057	13.9442				13.633	12.872	12.9615		13.3375	12.1791	12.7684	13.4501	13.3376	12.886	13.7443	13.2798	11.7757	11.2728	10.5646	11.6245	12.1154	11.5508	11.0172	12.4381	11.6147	12.6576				12.3364	11.5888	11.6952
Q99LI9	Q99LI9	Clp1	Polyribonucleotide 5'-hydroxyl-kinase Clp1	sp|Q99LI9|CLP1_MOUSE Polyribonucleotide 5'-hydroxyl-kinase Clp1 OS=Mus musculus OX=10090 GN=Clp1 PE=1 SV=1	47.71	2	8.5	12.5928	12.858	12.7747	12.5422	12.5926	12.2295	17.6862	12.4441	12.4701	12.9597	12.1057		12.1961	12.2488	12.3429	12.1881	12.2951	12.2565	12.1367	11.9088	12.285		12.2671	12.329	12.3086	12.2228	12.4939	12.3992	12.1734	12.2194	11.8598	17.3216	12.0825	12.1051	12.5991	11.7539		11.8381	11.8783	11.9857	11.8477	11.9447
Q64449	Q64449	Mrc2	C-type mannose receptor 2	sp|Q64449|MRC2_MOUSE C-type mannose receptor 2 OS=Mus musculus OX=10090 GN=Mrc2 PE=1 SV=3	166.97	3	3	14.7922	14.6691	15.924	13.8203	14.6985	14.5138	14.6023	14.6866	14.5523	14.8757			14.6955	14.9861	14.9816	13.8715	14.2265	14.3669	14.6683	14.679	14.5525	15.1391	15.5677	15.3651	14.4794	12.8614	12.7443	13.9877	11.8908	12.7645	12.5833	12.677	12.7642	12.6266	12.9544			12.7768	13.0549	13.0637	11.9705	12.3154
Q8JZW4	Q8JZW4	Cpne5	Copine-5	sp|Q8JZW4|CPNE5_MOUSE Copine-5 OS=Mus musculus OX=10090 GN=Cpne5 PE=1 SV=1	65.55	3	8.4	15.6018	15.601	15.2931	15.5002	15.5756	15.4149					15.3773			16.0698			15.0969		15.3799					15.8421	15.6674	14.7464	14.7515	14.4322	14.6459	14.7169	14.5598					14.5401			15.2138			14.2611
O35618	O35618	Mdm4	Protein Mdm4	sp|O35618|MDM4_MOUSE Protein Mdm4 OS=Mus musculus OX=10090 GN=Mdm4 PE=1 SV=2	54.93	3	9.2	13.0001	11.4473	11.6022	11.8054	13.2532	12.226	12.8725	11.6496	12.7211	12.1135	11.7609	11.6251		10.1097	11.9096	11.0426	11.5728	11.9434	11.8927	10.4062	12.1112	12.8739	12.5846		10.8499	12.3082	10.7612	10.9048	11.1146	12.558	11.5344	12.186	10.966	12.0342	11.4309	11.0871	10.9739		9.41724	11.2305	10.3804	10.9005
Q01149	Q01149	Col1a2	Collagen alpha-2(I) chain	sp|Q01149|CO1A2_MOUSE Collagen alpha-2(I) chain OS=Mus musculus OX=10090 GN=Col1a2 PE=1 SV=2	129.48	3	4.2			12.3119					12.8533	14.6481					12.8604							13.2087		10.5939	13.307	12.5736			10.1709					10.726	12.5175					10.7243
Q8BG60	Q8BG60	Txnip	Thioredoxin-interacting protein	sp|Q8BG60|TXNIP_MOUSE Thioredoxin-interacting protein OS=Mus musculus OX=10090 GN=Txnip PE=1 SV=1	44.33	2	6.3		14.7452	15.4272			14.7703		14.6976	14.9569	14.956		14.3309		15.1112	14.9178	14.627						14.6218	14.7065	14.6281			14.4551	15.1256			14.4746		14.4099	14.6659	14.6693		14.0757		14.8147	14.6346	14.3607
Q8BGA5	Q8BGA5	Krr1	KRR1 small subunit processome component homolog	sp|Q8BGA5|KRR1_MOUSE KRR1 small subunit processome component homolog OS=Mus musculus OX=10090 GN=Krr1 PE=2 SV=1	43.51	2	4.7		15.4642	15.5841			15.0052	14.8369	15.1513	15.3578	15.5279	14.7291		15.2422	15.466	15.5937				14.7932		14.9811	14.89	15.4747	15.7002	15.0367		15.2521	15.3606			14.7875	14.6244	14.9416	15.1448	15.3193	14.5293		15.0362	15.2474	15.3885
P0DW87	P0DW87	Zftraf1	Zinc finger TRAF-type-containing protein 1	sp|P0DW87|ZTRF1_MOUSE Zinc finger TRAF-type-containing protein 1 OS=Mus musculus OX=10090 GN=Zftraf1 PE=1 SV=1	43.41	3	7	11.7489	11.7791	12.5422	11.6778		11.8491	12.114	12.5556	12.0584	12.7616	11.9189		11.9786	12.3326		12.1026	12.2053		11.6745		11.3858	12.2297	11.9888	13.0631	12.348	11.5309	11.567	12.3187	11.461		11.6314	11.9014	12.3459	11.8454	12.553	11.7191		11.7726	12.114		11.9142	12.0069
P70227	P70227	Itpr3	Inositol 1,4,5-trisphosphate receptor type 3	sp|P70227|ITPR3_MOUSE Inositol 1,4,5-trisphosphate receptor type 3 OS=Mus musculus OX=10090 GN=Itpr3 PE=1 SV=3	304.08	3	2.3	10.726		11.5121	12.6894	12.1889	10.4672		12.4718	12.4248	10.0877					12.3958	10.0676	10.848	10.8005	10.5133	10.783	11.1637	10.7376		10.6435	11.1462	7.55894		8.33962	9.52356	9.0186	7.30045		9.31314	9.2628	6.93002					9.2416	6.93031	7.70063
Q6A098	Q6A098	Secisbp2l	Selenocysteine insertion sequence-binding protein 2-like	sp|Q6A098|SBP2L_MOUSE Selenocysteine insertion sequence-binding protein 2-like OS=Mus musculus OX=10090 GN=Secisbp2l PE=1 SV=2	119.57	3	2.7		12.9545	12.9192	13.9827	13.0277	12.4469	12.7668	12.6235	13.1781	12.8123				12.6748	12.736	12.6389	12.323	12.6531	11.9803			13.3102	12.8447	12.0592			11.4861	11.4393	12.5096	11.5501	10.9728	11.2979	11.1575	11.7087	11.3473				11.1999	11.2745	11.1942	10.8684
Q8C6G1	Q8C6G1	Cfap410	Cilia- and flagella-associated protein 410	sp|Q8C6G1|CF410_MOUSE Cilia- and flagella-associated protein 410 OS=Mus musculus OX=10090 GN=Cfap410 PE=1 SV=1	28.22	3	12.4	13.7486	14.7817	14.7025	14.8971	13.5359	14.838	14.8493	13.5399	13.8588	11.9209	13.4316	14.232	13.2936	11.1042	13.7212		13.4563	13.4698	13.8314	13.1788	10.7244	13.7042	12.8646	13.5064	13.4075	14	15.0391	14.9485	15.1497	13.7841	15.0898	15.1063	13.7997	14.1153	12.1818	13.7013	14.5243	13.5571	11.3552	13.9855		13.7275
Q8K4G1	Q8K4G1	Ltbp4	Latent-transforming growth factor beta-binding protein 4	sp|Q8K4G1|LTBP4_MOUSE Latent-transforming growth factor beta-binding protein 4 OS=Mus musculus OX=10090 GN=Ltbp4 PE=1 SV=2	178.52	2	1.1		14.5838	14.8649	14.7528	14.7199	14.5209	14.3827	14.8676	14.8781	15.0435	14.0436	14.2168	14.7777		14.7438	14.7463		14.8012		13.9695	15.002	15.0838	15.2762	15.4284			12.2197	12.4894	12.3839	12.3467	12.1512	12.0182	12.506	12.5131	12.6829	11.6918	11.8875	12.4197		12.3866	12.406
O55098	O55098	Stk10	Serine/threonine-protein kinase 10	sp|O55098|STK10_MOUSE Serine/threonine-protein kinase 10 OS=Mus musculus OX=10090 GN=Stk10 PE=1 SV=2	111.84	2	2.2	12.2297		12.9116	12.4831	11.9044	12.2523	11.8562	12.0026	12.6989	12.82			12.5638	12.3585			11.9357	12.5273	12.1421			12.0848	12.5399	11.8685		10.7893		11.4657	11.0439	10.4607	10.8122	10.4213	10.5705	11.2635	11.389			11.1355	10.9176			10.515
P59041	P59041	Dnajc30	DnaJ homolog subfamily C member 30, mitochondrial	sp|P59041|DJC30_MOUSE DnaJ homolog subfamily C member 30, mitochondrial OS=Mus musculus OX=10090 GN=Dnajc30 PE=1 SV=1	24.75	2	12.8	16.4643	14.176	15.8823	15.8696	15.3352	12.7563	14.2202	15.6047	14.9866	15.6728	14.0674	14.8476	14.6363	13.7351	14.326	14.1381	11.249	15.2219	14.8153	13.5955	13.8787	14.45	14.1766	12.6166	14.6809	16.6089	14.3264	16.0213	16.0153	15.4765	12.9012	14.3702	15.7576	15.1362	15.8267	14.2302	15.0329	14.7929	13.8792	14.4834	14.3124	11.4132
Q9Z2E1	Q9Z2E1	Mbd2	Methyl-CpG-binding domain protein 2	sp|Q9Z2E1|MBD2_MOUSE Methyl-CpG-binding domain protein 2 OS=Mus musculus OX=10090 GN=Mbd2 PE=1 SV=2	43.47	2	4.6	13.0891	13.0183	13.3401	13.6685	13.4452	13.3116	12.9168	13.3906	13.5981	13.4846	12.5701	12.6499	12.7374	13.381	13.5024	12.7389		12.6787	13.2043		12.9641	13.0985	13.2897	13.5513	13.1953	12.9535	12.8887	13.199	13.5341	13.3064	13.1763	12.7867	13.2634	13.4676	13.3584	12.4527	12.5551	12.6139	13.2449	13.3796	12.6331
Q6NXK8	Q6NXK8	Asic1	Acid-sensing ion channel 1	sp|Q6NXK8|ASIC1_MOUSE Acid-sensing ion channel 1 OS=Mus musculus OX=10090 GN=Asic1 PE=1 SV=1	59.63	3	7.2	14.564	14.657	14.6468	14.5086	14.5426	14.8615	14.5257	15.0283	14.739	15.2045		13.6519	14.313	14.8806	14.5946	14.3346	14.5031	14.3771	13.0005	13.7087	14.7193	14.3494	14.2546	14.5652	14.7068	14.268	14.3669	14.3453	14.2137	14.2433	14.5658	14.2352	14.7406	14.448	14.9179		13.3967	14.0291	14.584	14.3113	14.0683	14.2267
Q9CQJ2	Q9CQJ2	Pih1d1	PIH1 domain-containing protein 1	sp|Q9CQJ2|PIHD1_MOUSE PIH1 domain-containing protein 1 OS=Mus musculus OX=10090 GN=Pih1d1 PE=1 SV=1	32.19	3	12.8	14.2834	14.3553	14.3393	14.1235	14.1435	14.2143	13.9621	14.2699	14.4069	14.315		13.8582	14.1505	14.3192	14.3547	14.1976		14.3772	13.7405	14.1126	14.1866	14.3658	13.7563	13.7925	14.1247	14.1479	14.2257	14.1982	13.9892	14.0047	14.0791	13.832	14.1427	14.2764	14.1888		13.7634	14.027	14.1832	14.232	14.0917
Q3U1T3	Q3U1T3	Brms1l	Breast cancer metastasis-suppressor 1-like protein	sp|Q3U1T3|BRM1L_MOUSE Breast cancer metastasis-suppressor 1-like protein OS=Mus musculus OX=10090 GN=Brms1l PE=2 SV=1	37.63	2	5.6	13.4827	13.536	13.749	13.8343	13.7083	13.324	13.4442	13.7092	13.9472	14.0314			13.5102	13.5177	13.6505	13.5421	13.3757	13.2892	13.4055	13.3344	13.493	13.7657	13.6239	13.8955	13.7201	13.4346	13.4938	13.6954	13.7874	13.657	13.2762	13.4015	13.6695	13.9042	13.9926			13.4742	13.4691	13.6152	13.5237	13.3473
Q60829	Q60829	Ppp1r1b	Protein phosphatase 1 regulatory subunit 1B	sp|Q60829|PPR1B_MOUSE Protein phosphatase 1 regulatory subunit 1B OS=Mus musculus OX=10090 GN=Ppp1r1b PE=1 SV=2	21.77	4	42.8	16.4807	16.0144	16.3129	16.05	15.7018	15.8823	15.5255	15.8784	16.4759	16.3269	15.6005		15.4866	15.2099	16.3675	16.3568	15.7139	16.4267	15.4723	15.2179	16.227	16.2668	15.8949	15.7609	16.1732	16.9731	16.5128	16.7999	16.5437	16.191	16.3751	16.0234	16.3792	16.9734	16.8287	16.1112		15.9911	15.7018	16.8727	16.879	16.226
Q3U0P5	Q3U0P5	Entpd6	Ectonucleoside triphosphate diphosphohydrolase 6	sp|Q3U0P5|ENTP6_MOUSE Ectonucleoside triphosphate diphosphohydrolase 6 OS=Mus musculus OX=10090 GN=Entpd6 PE=1 SV=1	49.77	4	10.8	14.0751	14.0116	14.1724	14.2065	14.1311	13.9404	13.9331	14.1747	13.8319	14.233	13.5816	13.3268	13.7913		14.2588	13.9554		14.0337	14.0238	13.7059	14.0065	13.748	13.7096		13.9351	13.6347	13.5771	13.7265	13.7673	13.6874	13.5003	13.4981	13.7427	13.3965	13.8019	13.1594	12.9271	13.363		13.8312	13.5447
O88829	O88829	St3gal5	Lactosylceramide alpha-2,3-sialyltransferase	sp|O88829|SIAT9_MOUSE Lactosylceramide alpha-2,3-sialyltransferase OS=Mus musculus OX=10090 GN=St3gal5 PE=1 SV=2	47.33	2	5.1	12.4545	12.7697	12.7657	12.9248	12.4477	11.8659	12.6119	12.7468	12.6966	12.8848	11.7555	12.068	12.4627	12.9749		12.2206	11.8724	12.7083			12.9805	12.2143	12.4494	12.599	12.4687	12.0141	12.3352	12.3198	12.4856	12.004	11.4258	12.1769	12.3148	12.2612	12.4538	11.3333	11.6683	12.0344	12.534		11.8099	11.4517
Q8VF31	Q8VF31	Or9a4	Olfactory receptor	tr|Q8VF31|Q8VF31_MOUSE Olfactory receptor OS=Mus musculus OX=10090 GN=Or9a4 PE=2 SV=1	35.32	2	8.9			13.7514	13.5053	12.2664	12.6188	12.6978	13.831	12.5932	14.0998	13.819	13.6108	11.572				13.7301	13.799		12.5418								14.5278	14.2885	13.0452	13.4011	13.4853	14.6214	13.3802	14.8911	14.6192	14.4336	12.366				14.5318
Q8BZL4	Q8BZL4	Gpr22	G-protein coupled receptor 22	sp|Q8BZL4|GPR22_MOUSE G-protein coupled receptor 22 OS=Mus musculus OX=10090 GN=Gpr22 PE=2 SV=1	48.99	2	2.5	12.02	12.2235	12.5044	12.1285	12.0425	11.9261	11.9952	12.5064	12.5355	12.4849	10.8779	11.0434	12.2501	11.7005		11.9747	12.2612	12.2811	10.6775	10.7411	12.2521	11.7519	11.7362	12.0346	12.3245	12.8019	13.0114	13.2808	12.9117	12.8213	12.7084	12.7826	13.2967	13.3225	13.2763	11.6781	11.8662	13.0441	12.4819		12.7864	13.0629
Q8VDU0	Q8VDU0	Gpsm2	G-protein-signaling modulator 2	sp|Q8VDU0|GPSM2_MOUSE G-protein-signaling modulator 2 OS=Mus musculus OX=10090 GN=Gpsm2 PE=1 SV=2	75.54	3	8.5	14.4509	14.5928		14.147	14.3641	14.5694	14.3899		14.2851	14.8126		14.1399	14.5115	13.9702	14.303	14.1516	14.6766		11.1445		14.5798					13.2735	13.4213		12.9709	13.1835	13.3923	13.218		13.1128	13.6446		13.0033	13.3462	12.7923	13.1384	13.004	13.5189
P54099	P54099	Polg	DNA polymerase subunit gamma-1	sp|P54099|DPOG1_MOUSE DNA polymerase subunit gamma-1 OS=Mus musculus OX=10090 GN=Polg PE=1 SV=3	136.67	2	1.5	12.5272	12.0845	12.2113	11.6141	12.1447		12.1305	11.7126	11.9297	12.494				11.951	11.9823	11.579		11.8926	11.9447	11.7631	11.5889	12.102	12.1185		12.194	10.5964	10.1596	10.2751	9.68458	10.2107		10.2053	9.79026	10.004	10.5726				10.0198	10.0644	9.67797
Q9QZ29	Q9QZ29	Igbp1b	Immunoglobulin-binding protein 1b	sp|Q9QZ29|IGB1B_MOUSE Immunoglobulin-binding protein 1b OS=Mus musculus OX=10090 GN=Igbp1b PE=1 SV=1	39.22	2	8.7	13.2682	13.2713	13.2447	13.385	13.6058	13.1825		12.5989	13.3676	13.4427			13.2186	12.8058	13.1346	12.9609	13.1251		13.069		13.0805	12.8085	13.3934	13.0773	13.3388	13.2201	13.2292	13.1911	13.3381	13.5544	13.1347		12.5592	13.3246	13.404			13.1826	12.7572	13.0993	12.9425	13.0967
P97452	P97452	Bop1	Ribosome biogenesis protein BOP1	sp|P97452|BOP1_MOUSE Ribosome biogenesis protein BOP1 OS=Mus musculus OX=10090 GN=Bop1 PE=1 SV=1	82.49	3	10	13.6401	13.984	14.3078	14.5167	14.2432	13.9807	13.2422	14.2689	14.3884	14.5264	13.7305		13.911	14.7058	14.0798	14.3914	13.0393		14.3389	13.9228	14.1672	14.1704	14.3469	14.192	14.1849	12.5476	12.8975	13.2098	13.4254	13.1475	12.8885	12.1552	13.1848	13.3009	13.4433	12.6562		12.8306	13.6128	13.0001	13.3286	11.9665
Q8BRM2	Q8BRM2	Gorab	RAB6-interacting golgin	sp|Q8BRM2|GORAB_MOUSE RAB6-interacting golgin OS=Mus musculus OX=10090 GN=Gorab PE=1 SV=1	41.46	2	7.6	12.6807		12.9443			12.6687		12.9405	12.9347	12.8502				12.5436			12.7155	12.6565	12.537		12.978	12.9202	12.7052	12.4518	12.7477	12.2403		12.4984			12.2286		12.5085	12.4993	12.4192				12.1027			12.2947
Q61420	Q61420	Slc35a1	CMP-sialic acid transporter	sp|Q61420|S35A1_MOUSE CMP-sialic acid transporter OS=Mus musculus OX=10090 GN=Slc35a1 PE=1 SV=2	36.43	2	7.4	14.3502	14.0108	14.478		13.6793	13.7726		13.9951	13.8458	13.8575			13.8318		14.2656	13.8698	13.8589	13.3118	13.3967		14.1207	14.3173	13.7503	13.6359	14.2653	14.4947	14.1613	14.6171		13.8206	13.9174		14.148	13.9954	14.0115			13.9884		14.423	14.044	14.0231
Q9ES46	Q9ES46	Parvb	Beta-parvin	sp|Q9ES46|PARVB_MOUSE Beta-parvin OS=Mus musculus OX=10090 GN=Parvb PE=1 SV=1	41.64	3	9.6	13.094	13.5212	13.8986	13.3885	13.3539	13.715	13.4262	13.4436	13.7341	13.5512	12.9363		13.2719	13.7573	13.9967	12.8532		13.1965	13.4438	13.0846	13.746	13.6442	13.3697	13.8965	13.4148	12.724	13.1571	13.523	13.0196	12.9806	13.3453	13.0617	13.082	13.3691	13.1906	12.5845		12.9139	13.3867	13.6395	12.5129
Q8R5F8	Q8R5F8	Eps8l1	Epidermal growth factor receptor kinase substrate 8-like protein 1	sp|Q8R5F8|ES8L1_MOUSE Epidermal growth factor receptor kinase substrate 8-like protein 1 OS=Mus musculus OX=10090 GN=Eps8l1 PE=1 SV=1	79.98	5	8.7	12.8429	12.8979	12.3675			13.7948	12.4823	12.8806	12.7898	12.6812			12.5714		12.6564			12.155	13.1547	12.3715	13.619	12.6426	13.4227	12.8984		11.6655	11.7265	11.1847			12.6178	11.3104	11.7116	11.6174	11.5132			11.406		11.4918
Q3ULL6	Q3ULL6	Upf3b	UPF3 regulator of nonsense transcripts homolog B (yeast)	tr|Q3ULL6|Q3ULL6_MOUSE UPF3 regulator of nonsense transcripts homolog B (yeast) OS=Mus musculus OX=10090 GN=Upf3b PE=1 SV=1	57.03	3	3.6				11.5478	11.161	11.3322	12.1564	11.3196	11.7271	12.1171					10.7002	10.767		11.6319	10.9525	11.0372	10.7282	10.9488		10.4313	11.3116				11.4135	11.0222	11.197	12.0263	11.1924	11.5966	11.9909					10.5775	10.6611
P60882	P60882	Megf8	Multiple epidermal growth factor-like domains protein 8	sp|P60882|MEGF8_MOUSE Multiple epidermal growth factor-like domains protein 8 OS=Mus musculus OX=10090 GN=Megf8 PE=1 SV=2	297.29	2	1.3	14.4398	14.4781	15.1432	15.143	14.34	15.0101	14.9308	14.7286	14.8497	15.1887	14.0869	14.5264	14.6588	14.0485	13.7858	14.7927		14.7973	14.5747	13.9008			14.8092		14.5801	11.7479	11.7921	12.4457	12.4522	11.6448	12.3185	12.2444	12.045	12.1628	12.5061	11.4131	11.8753	11.9789	11.356	11.1066	12.1305
F6XLV1	F6XLV1	Crocc2	Ciliary rootlet coiled-coil protein 2	sp|F6XLV1|CRCC2_MOUSE Ciliary rootlet coiled-coil protein 2 OS=Mus musculus OX=10090 GN=Crocc2 PE=3 SV=2	186.52	12	8	12.7158	13.2461	13.2383	12.6343	12.2921	12.8705	13.0127	13.7897	13.1099		12.4465	12.6229	12.3605	12.4753	12.6347		12.9437		12.6791	11.998	13.6723	13.3286	13.4413	13.0504	12.8739	10.0384	10.5746	10.5553	9.95802	9.6114	10.1933	10.3407	11.1206	10.4375		9.78728	9.98625	9.6951	9.79729	9.97006		10.2859
Q6PGF3	Q6PGF3	Med16	Mediator of RNA polymerase II transcription subunit 16	sp|Q6PGF3|MED16_MOUSE Mediator of RNA polymerase II transcription subunit 16 OS=Mus musculus OX=10090 GN=Med16 PE=1 SV=2	91.73	3	6.3	13.7892	13.6094	13.5085	13.7605	13.3769	13.582	13.3875		13.8288	14.2466				18.0033	13.3307	13.6746		13.1506	13.0865	13.0765	13.8242	13.1204	13.804	13.1102	13.4536	12.3487	12.1749	12.0626	12.3213	11.9333	12.1419	11.9525		12.3934	12.8156				16.5624	11.9031	12.2639
P62267	P62267	Rps23	Small ribosomal subunit protein uS12	sp|P62267|RS23_MOUSE Small ribosomal subunit protein uS12 OS=Mus musculus OX=10090 GN=Rps23 PE=1 SV=3	15.8	3	32.2	19.6714	17.4288	17.6667	17.4207	17.1172	17.1831	17.0672	17.787	17.5471	17.7167	17.3395		16.9447	17.6028	16.9284	17.1988	18.6984	17.5065	17.7127	16.8104	18.0233	16.834	16.887	17.5692	17.9357	21.0384	18.8017	19.0281	18.7889	18.4809	18.5503	18.4396	19.1623	18.9191	19.093	18.7247		18.3237	18.9693	18.3081	18.5954	20.085
Q9DBA9	Q9DBA9	Gtf2h1	General transcription factor IIH subunit 1	sp|Q9DBA9|TF2H1_MOUSE General transcription factor IIH subunit 1 OS=Mus musculus OX=10090 GN=Gtf2h1 PE=1 SV=2	61.81	3	7.1	11.4846	11.4824	12.0019	11.8692	11.8161	11.411		12.0958	11.7422	12.2123	11.0882			11.7391	11.9218				11.2269	11.6656	11.9353	11.4692	11.9672	11.8723	12.0035	10.5296	10.5333	11.0415	10.9155	10.8579	10.4563		11.1492	10.7922	11.2667	10.1515			10.7836	10.9796
Q9DBN9	Q9DBN9	Ddx59	Probable ATP-dependent RNA helicase DDX59	sp|Q9DBN9|DDX59_MOUSE Probable ATP-dependent RNA helicase DDX59 OS=Mus musculus OX=10090 GN=Ddx59 PE=1 SV=1	68.19	2	3.9	12.5589	12.3607	12.8307		13.01	12.7461	12.686	13.0979	12.651	13.0803	12.3818		12.6082	12.4424		12.2189	12.4786	12.5609	12.5114		12.5135	12.7348	12.5737	12.8763	13.0414	11.3014	11.109	11.5676		11.7492	11.4889	11.4339	11.8487	11.3985	11.8322	11.1425		11.3627	11.1843		10.9911	11.2407
Q8VEB6	Q8VEB6	Elac1	Zinc phosphodiesterase ELAC protein 1	sp|Q8VEB6|RNZ1_MOUSE Zinc phosphodiesterase ELAC protein 1 OS=Mus musculus OX=10090 GN=Elac1 PE=2 SV=1	39.71	2	6.6	11.8005	11.4293	11.2665	11.9905	11.7048	11.834	12.1091	12.1922	12.5347	12.1109			11.8367	11.7414	12.4321	12.255	11.9083	11.8401			10.952	12.0235	11.8922	11.8465	11.5028	11.8456	11.4802	11.3061	12.0367	11.7466	11.8793	12.1596	12.2456	12.5848	12.1653			11.8938	11.7859	12.4899	12.3298	11.9729
P46737	P46737	Brcc3	Lys-63-specific deubiquitinase BRCC36	sp|P46737|BRCC3_MOUSE Lys-63-specific deubiquitinase BRCC36 OS=Mus musculus OX=10090 GN=Brcc3 PE=1 SV=1	33.32	3	18.6	14.3815	15.2469	14.932	14.873	14.4334	15.3765	14.9662	15.2271	13.7407	14.4581	13.9713	14.3494	14.6965	14.4313	13.7227	13.3635	14.5256	12.793	13.9208	13.3131	14.5087	14.6466	13.0748	14.3333	14.6839	14.3334	15.2047	14.8784	14.8262	14.382	15.3287	14.9236	15.1874	13.6976	14.4193	13.9414	14.3421	14.6605	14.3827	13.6874	13.3451	14.4972
P01660	P01660		Ig kappa chain V-III region PC 3741/TEPC 111	sp|P01660|KV3A8_MOUSE Ig kappa chain V-III region PC 3741/TEPC 111 OS=Mus musculus OX=10090 PE=1 SV=1	12.09	2	26.1	14.2969	13.4917	13.6001	13.1878			13.2421	12.2865		13.5647	14.025		14.2096					13.5816		13.4364						16.2488	15.4495	15.5465	15.141			15.1994	14.2468		15.526	15.9951		16.1735
D3Z649	D3Z649	Kcnt2	Potassium channel, subfamily T, member 2	tr|D3Z649|D3Z649_MOUSE Potassium channel, subfamily T, member 2 OS=Mus musculus OX=10090 GN=Kcnt2 PE=1 SV=1	130.27	2	1.9	11.7303	11.937	11.9699	12.2161	11.5924	11.4303	11.5508	12.2669	12.3326	12.3977			11.6667		11.9663	12.1065	12.1191	11.9594	11.1499		11.6169	12.0827	11.8937		11.4898	9.87487	10.0875	10.109	10.3619	9.73371	9.5752	9.70086	10.4198	10.4821	10.5517			9.82331		10.1237	10.2808	10.2833
Q6VH22	Q6VH22	Ift172	Intraflagellar transport protein 172 homolog	sp|Q6VH22|IF172_MOUSE Intraflagellar transport protein 172 homolog OS=Mus musculus OX=10090 GN=Ift172 PE=1 SV=1	197.42	2	1.4	12.2607	12.0134	12.6067		12.4195	12.4345	12.3119	12.6006	12.7125	12.5628				12.5292	12.3989			12.2689	12.3463	12.1731	12.2465	12.1182	12.5465			9.54017	9.29882	9.88072		9.69571	9.71434	9.59682	9.88839	9.99703	9.8517				9.8082	9.69116
Q923D4	Q923D4	Sf3b5	Splicing factor 3B subunit 5	sp|Q923D4|SF3B5_MOUSE Splicing factor 3B subunit 5 OS=Mus musculus OX=10090 GN=Sf3b5 PE=1 SV=1	10.11	2	32.6	12.9831	13.4009	12.4164	12.2053	12.2172	13.0084	12.9934	12.358	11.7302	11.4755	11.8271	11.698	12.2195	10.9697	11.8244	12.8103	12.4001	11.5574	10.8194	10.2784	12.577	12.5608	11.2906	11.523	12.4328	14.6131	15.0368	14.0408	13.8365	13.8439	14.6387	14.6289	13.9964	13.3652	13.1149	13.4753	13.3688	13.8615	12.5992	13.4672	14.47	14.0498
P28654	P28654	Dcn	Decorin	sp|P28654|PGS2_MOUSE Decorin OS=Mus musculus OX=10090 GN=Dcn PE=1 SV=1	39.78	5	16.1	14.2326	14.0179	16.2012	13.938	13.8292	14.3462	13.9789	13.614	14.1659	14.2021	13.7498		13.5921	15.3159	15.0337		13.1609	13.7569	15.5154	14.5741	15.021	15.3493	15.0679	15.2803	14.5537	13.9366	13.7278	15.8997	13.6432	13.5299	14.0505	13.6884	13.3263	13.8749	13.9155	13.472		13.3081	15.0193	14.7505		12.8845
P48025	P48025	Syk	Tyrosine-protein kinase SYK	sp|P48025|KSYK_MOUSE Tyrosine-protein kinase SYK OS=Mus musculus OX=10090 GN=Syk PE=1 SV=2	71.33	2	5.1	12.8041	12.6209	12.2536					12.4141							12.2902				12.5547		12.142	12.2634	12.2496		12.5324	11.5861	11.4088	11.03					11.2044							11.0849
Q8CGA2	Q8CGA2	Tbc1d14	TBC1 domain family member 14	sp|Q8CGA2|TBC14_MOUSE TBC1 domain family member 14 OS=Mus musculus OX=10090 GN=Tbc1d14 PE=1 SV=2	78.27	3	5.8	14.0563	13.6607	14.1527	13.9773	13.9525	13.7555	14.0323	13.812	14.1071	14.1966	13.4078	13.6136	13.5009	13.9265	13.9307	13.9274		13.7376	13.4793	13.4523	13.9881	13.7435	14.0395	13.7062	13.2206	13.0541	12.6643	13.1449	12.9762	12.947	12.7536	13.0355	12.8181	13.1098	13.2037	12.4237	12.6521	12.5107	12.9237	12.9412	12.9548
A6H603	A6H603	Nwd1	NACHT domain- and WD repeat-containing protein 1	sp|A6H603|NWD1_MOUSE NACHT domain- and WD repeat-containing protein 1 OS=Mus musculus OX=10090 GN=Nwd1 PE=2 SV=2	173.16	3	3.4	15.2554		15.4736		15.7017			15.524	15.6871	15.5097	14.9102		15.4739	15.6363	15.3436	15.1728					14.9072		14.8387	15.1371		12.815		13.0277		13.258			13.0919	13.2517	13.0787	12.488		13.0455	13.1954	12.916	12.7621
Q9CZK6	Q9CZK6	Anks3	Ankyrin repeat and SAM domain-containing protein 3	sp|Q9CZK6|ANKS3_MOUSE Ankyrin repeat and SAM domain-containing protein 3 OS=Mus musculus OX=10090 GN=Anks3 PE=1 SV=2	72.04	2	3.1	12.3674	11.9622	12.6681	12.0947		12.3613	11.807	12.4582	12.2387	11.6791	11.5606	11.7722	11.9706	12.0618		11.9168	11.5227	11.9619			11.832	12.3226		12.0374	11.8824	11.2749	10.8756	11.5701	11.0034		11.2691	10.72	11.374	11.1513	10.596	10.4864	10.7205	10.8901	10.9688		10.854	10.4498
A6H6J9	A6H6J9	Ankrd50	Ankyrin repeat domain 50	tr|A6H6J9|A6H6J9_MOUSE Ankyrin repeat domain 50 OS=Mus musculus OX=10090 GN=Ankrd50 PE=1 SV=1	50.23	2	4.7	13.4684	14.0477	12.7208	13.4315	13.302	13.7506		13.5664	13.7699	13.389	13.8065			13.4652	12.9657	13.418	13.2083	12.9171	12.6552	13.4713	13.5438	12.9241	13.1532	13.3269	13.095	13.028	13.6132	12.2749	12.9923	12.8584	13.3105		13.1343	13.3345	12.9579	13.3843			13.0243	12.5381	13.0073	12.7875
Q9CZ52	Q9CZ52	Antxr1	Anthrax toxin receptor 1	sp|Q9CZ52|ANTR1_MOUSE Anthrax toxin receptor 1 OS=Mus musculus OX=10090 GN=Antxr1 PE=1 SV=2	62.27	2	4.1	13.1148	13.9988	14.2176	13.4323	13.785	13.2474	13.2237	13.8117	13.5756	13.5801	11.6417	12.4766	13.3929	13.2859	13.3149	13.2808	12.8032	13.2384	12.4799	11.9373	13.3722	12.9129	13.3777	13.3727	13.7276	12.6073	13.4972	13.7046	12.926	13.2742	12.7401	12.7216	13.3126	13.0731	13.082	11.1524	12.0099	12.8975	12.7779	12.8202	12.803	12.3153
Q9ER67	Q9ER67	Maged2	MAGE family member D2	tr|Q9ER67|Q9ER67_MOUSE MAGE family member D2 OS=Mus musculus OX=10090 GN=Maged2 PE=1 SV=1	65.36	3	5	13.4973	13.4099	13.6042	13.2648	13.4656	13.4645	13.2428	13.5691	13.4709	13.6487	11.3702	11.9168	13.0482	13.3025	13.5119	13.0881	13.0123	13.2592	11.9915	12.0185	13.4911	13.4163	13.0113	13.0719	13.1515	12.6943	12.6128	12.7957	12.463	12.6593	12.6619	12.4453	12.7745	12.6729	12.8551	10.5855	11.1546	12.2573	12.499	12.7218	12.3148	12.229
Q61474	Q61474	Msi1	RNA-binding protein Musashi homolog 1	sp|Q61474|MSI1H_MOUSE RNA-binding protein Musashi homolog 1 OS=Mus musculus OX=10090 GN=Msi1 PE=1 SV=1	39.09	3	8.8	13.2917	13.4137	13.5552	13.8779	13.5612	13.7352	13.4131	13.8089	13.9605	13.671	12.5322		13.4232	13.8058	13.2924	13.5927	13.4691	13.9075	12.832	12.7048	13.258	13.7644	13.8385	13.5207	13.6684	13.5431	13.6711	13.8012	14.1306	13.8095	13.987	13.6701	14.0687	14.217	13.9319	12.8019		13.6867	14.0568	13.5567	13.8739	13.7402
P0DN34	P0DN34	Ndufb1	NADH dehydrogenase [ubiquinone] 1 beta subcomplex subunit 1	sp|P0DN34|NDUB1_MOUSE NADH dehydrogenase [ubiquinone] 1 beta subcomplex subunit 1 OS=Mus musculus OX=10090 GN=Ndufb1 PE=1 SV=1	6.95	2	54.4	14.2126	13.9983	13.9636	14.7193	13.5588	14.1221	14.1943	15.0917	14.9003	14.2214	12.5735	12.2578	13.6206	13.9579	14.1796	14.812	13.4505	14.845	12.6051	12.6837	14.1835	13.6344	14.174	14.7829	15.0055	16.5796	16.3712	16.3251	17.0874	15.9225	16.4894	16.5667	17.467	17.2723	16.5977	14.9587	14.6655	15.9995	16.3243	16.5593	17.2086	15.8371
Q9JHS3	Q9JHS3	Lamtor2	Ragulator complex protein LAMTOR2	sp|Q9JHS3|LTOR2_MOUSE Ragulator complex protein LAMTOR2 OS=Mus musculus OX=10090 GN=Lamtor2 PE=1 SV=1	13.47	3	28.8	15.5741	15.7467	15.7764	15.6174	15.5107	15.4675	15.4758	15.933	15.6098	15.8095	15.0683		15.4237	15.6703	15.545	15.1637	15.5243	15.6564	15.4448	15.3419	15.6401	15.4504	15.5662	15.5284	15.56	16.941	17.1195	17.1379	16.9856	16.8744	16.8348	16.8482	17.3083	16.9817	17.1859	16.4535		16.8027	17.0367	16.9247	16.5604	16.9109
Q9JJ80	Q9JJ80	Rpf2	Ribosome production factor 2 homolog	sp|Q9JJ80|RPF2_MOUSE Ribosome production factor 2 homolog OS=Mus musculus OX=10090 GN=Rpf2 PE=2 SV=2	35.34	2	6.9	14.1602	14.3821	13.2566	13.803	14.2212	14.3926	14.3758	14.6961	14.7195	14.8289	13.9573		14.4548	14.5168	14.5859	14.3498	14.306		14.3472	14.2663	14.6116	14.5881	14.9891	14.4269	14.5663	14.3047	14.5326	13.3957	13.9488	14.3625	14.5375	14.5259	14.849	14.869	14.9828	14.12		14.6114	14.6608	14.7433	14.524	14.4702
Q6P1I3	Q6P1I3	Kics2	KICSTOR subunit 2	sp|Q6P1I3|KICS2_MOUSE KICSTOR subunit 2 OS=Mus musculus OX=10090 GN=Kics2 PE=1 SV=1	50.22	3	11	11.9975	12.3265	12.581		12.1078		11.7206	12.8821	12.9094	12.7881	11.9855	12.1835	12.4273	11.4859		12.2158		12.5006		12.4273	11.9081	12.0507	12.3421	12.5191		11.249	11.5839	11.8269		11.356		10.9776	12.1419	12.1659	12.049	11.2552	11.4757	11.6908	10.7368		11.497
Q9D708	Q9D708	S100a16	Protein S100-A16	sp|Q9D708|S10AG_MOUSE Protein S100-A16 OS=Mus musculus OX=10090 GN=S100a16 PE=1 SV=1	14.31	2	18.5	11.9504	12.1185	11.6742	11.6198	12.1101	11.8821	11.9325	11.6118	12.2606	12.0309	11.2537	10.3577	11.521	11.3326	11.5602	11.5718	11.8133	11.5307	10.0047		10.7996	11.5777	10.9617	11.9886		13.3174	13.4913	13.0357	12.988	13.4738	13.2494	13.3049	12.9871	13.6325	13.4073	12.6389	11.7654	12.9	12.6991	12.9399	12.9685	13.1999
O55047	O55047	Tlk2	Serine/threonine-protein kinase tousled-like 2	sp|O55047|TLK2_MOUSE Serine/threonine-protein kinase tousled-like 2 OS=Mus musculus OX=10090 GN=Tlk2 PE=1 SV=2	82.21	4	5.3	11.9351	11.9565	12.113	12.0345	12.103	11.9762	11.9315	12.2561	12.3773	12.3025		11.6369	12.1456	12.1171	12.0265		11.8243	12.2485	11.2184	11.3843	11.9009	11.9342	12.1373	12.193	12.4113	10.7577	10.785	10.9301	10.8584	10.9223	10.7991	10.7596	11.0871	11.2049	11.1345		10.5004	10.9802	10.9392	10.8619		10.6666
Q9D7S9	Q9D7S9	Chmp5	Charged multivesicular body protein 5	sp|Q9D7S9|CHMP5_MOUSE Charged multivesicular body protein 5 OS=Mus musculus OX=10090 GN=Chmp5 PE=1 SV=1	24.56	3	25.1	16.7931	16.6828	16.1953	16.3248	16.4838	16.6604	16.5146	16.7137	16.576				16.3624	15.9394	16.6401	16.4268	16.1176	16.1578	16.4034	16.3803	16.2842	16.3591	15.9455	16.38	16.4979	18.16	18.0557	17.5568	17.693	17.8475	18.0277	17.8871	18.089	17.948				17.7413	17.3058	18.0199	17.8235	17.5042
Q8K441	Q8K441	Abca6	ATP-binding cassette sub-family A member 6	sp|Q8K441|ABCA6_MOUSE ATP-binding cassette sub-family A member 6 OS=Mus musculus OX=10090 GN=Abca6 PE=1 SV=2	183.17	3	2.5		12.0986	12.807	12.6291	12.928	11.8357			12.7424	12.9105			12.3555	12.4317	12.5885			12.96	11.1702				12.7842		13.2651		10.012	10.709	10.5378	10.8323	9.74352			10.6549	10.8274			10.275	10.3387	10.5088
P84099	P84099	Rpl19	Large ribosomal subunit protein eL19	sp|P84099|RL19_MOUSE Large ribosomal subunit protein eL19 OS=Mus musculus OX=10090 GN=Rpl19 PE=1 SV=1	23.45	3	12.2	14.2358	14.1644	14.0044	14.268	13.7331	13.8048	13.4467	14.6307	14.2352	14.5381	12.963	12.6954	13.7386	13.8915	14.3645	14.0973	11.0087	13.9219	13.4342	13.2177	15.5829	15.1283	15.519	15.4729	15.7948	15.6027	15.5373	15.3659	15.6362	15.0968	15.1721	14.8191	16.006	15.6072	15.9144	14.3481	14.1031	15.1176	15.2579	15.7442	15.494	12.3953
B1AYL1	B1AYL1	Scn7a	Sodium channel protein	tr|B1AYL1|B1AYL1_MOUSE Sodium channel protein OS=Mus musculus OX=10090 GN=Scn7a PE=1 SV=1	192.05	2	1.8	10.9481	12.003	11.9673	12.1536	12.0206	11.4293	10.8148		11.4916	11.4926	11.9117	11.1819	11.7786							11.4631	10.6519					8.85562	9.9164	9.86929	10.0623	9.92483	9.33717	8.72781		9.40409	9.40954	9.83743	9.13024	9.69813
P21956	P21956	Mfge8	Lactadherin	sp|P21956|MFGM_MOUSE Lactadherin OS=Mus musculus OX=10090 GN=Mfge8 PE=1 SV=3	51.21	5	10.4	14.3388	14.5472	15.4446	14.6922	14.2814	14.6527	14.3846	14.6565	14.8361	14.8029	14.0304	13.8311	14.4182	14.8728	14.6267	14.3832		14.4097	15.0217	14.5882	14.4197	14.6066	13.9856	14.5652	14.4311	13.8984	14.1127	14.9987	14.253	13.8378	14.2126	13.9496	14.2244	14.4007	14.3718	13.6082	13.4315	13.9898	14.4319	14.1991	13.9725
Q8VCZ6	Q8VCZ6	Sgsm3	Small G protein signaling modulator 3	sp|Q8VCZ6|SGSM3_MOUSE Small G protein signaling modulator 3 OS=Mus musculus OX=10090 GN=Sgsm3 PE=1 SV=1	85.44	6	7.5	13.8241	13.6818	13.9682	13.8837	13.7672	13.7743	13.6239	13.9512	14.0066	14.1851	13.3597	13.353	13.73	13.5751	13.9824	13.5086		13.8593	13.23	13.6211	13.6928	13.2876	13.9542	13.8732	13.8704	12.5281	12.3917	12.6667	12.5888	12.4679	12.4786	12.3333	12.6635	12.7156	12.8984	12.0819	12.0978	12.446	12.2785	12.6992	12.2423
O88630	O88630	Gosr1	Golgi SNAP receptor complex member 1	sp|O88630|GOSR1_MOUSE Golgi SNAP receptor complex member 1 OS=Mus musculus OX=10090 GN=Gosr1 PE=1 SV=2	28.47	3	18	12.9472	13.3493	13.4428	13.2935	13.0352	13.2106	13.8153	13.1068	13.214	13.1543		12.5889	13.3244	13.5927	13.15	13.4921	12.6592	13.4302	13.2229		13.6185	13.2239	13.4684	13.5836	12.9466	12.8991	13.3071	13.3892	13.2466	12.9838	13.1629	13.7727	13.067	13.1709	13.1156		12.5816	13.2884	13.5441	13.1147	13.4737	12.6307
Q9DCI3	Q9DCI3	Stard3nl	STARD3 N-terminal-like protein	sp|Q9DCI3|STR3N_MOUSE STARD3 N-terminal-like protein OS=Mus musculus OX=10090 GN=Stard3nl PE=1 SV=2	26.79	2	8.9	14.9195	15.0509	15.0532	15.1452	14.6858	15.0447	14.737	14.9788	14.983	15.1471	14.0552	14.1008	14.8408	14.8319	14.9225	14.6958	15.1149	14.6525		13.7496	14.6594	14.8308	14.5172		14.7614	15.5494	15.6868	15.6777	15.7763	15.3125	15.6749	15.3724	15.6172	15.618	15.7864	14.7034	14.7715	15.4829	15.4613	15.5653	15.3555	15.7645
Q68FD7	Q68FD7	Fnip1	Folliculin-interacting protein 1	sp|Q68FD7|FNIP1_MOUSE Folliculin-interacting protein 1 OS=Mus musculus OX=10090 GN=Fnip1 PE=1 SV=1	130.04	3	3.3	12.45	12.5546	12.3288	12.9788	12.5651	12.8215	12.5335	13.0695	12.8908	13.0327	12.3699		12.8386	12.8678	12.5378	12.5824	12.7951	12.836		12.1018	12.852	12.2716	12.8092	12.7733	12.8293	10.5192	10.6298	10.3926	11.0493	10.6311	10.8911	10.6082	11.1471	10.9651	11.1113	10.4574		10.9199	10.9365	10.6198	10.6813	10.8841
O70622	O70622	Rtn2	Reticulon-2	sp|O70622|RTN2_MOUSE Reticulon-2 OS=Mus musculus OX=10090 GN=Rtn2 PE=1 SV=1	51.32	2	8.1	13.6727	13.9712	13.936	13.6534	13.8502	14.0369	13.4817	13.9544	14.1153	13.6895	11.6459	13.0648	13.2867	13.6416	13.7061	13.2991	13.3766	13.5554	12.9414	12.3649	13.3502	13.4919	13.6074	13.5019	13.7417	13.8172	14.1217	14.0751	13.7992	13.9915	14.1818	13.6318	14.1073	14.2649	13.8434	11.8087	13.2501	13.4433	13.7857	13.8635	13.4733	13.5408
G3X9Z4	G3X9Z4	Pcf11	Pre-mRNA cleavage complex 2 protein Pcf11	sp|G3X9Z4|PCF11_MOUSE Pre-mRNA cleavage complex 2 protein Pcf11 OS=Mus musculus OX=10090 GN=Pcf11 PE=2 SV=1	172.61	2	1.9	10.8671	11.3948	11.755	12.0455	11.2608	11.2082	11.2089	11.3852	11.9856				11.1829	11.8458		11.7007		10.9782	11.58	11.6752	12.245	11.7087	11.7438	11.9158	11.8984	8.40964	8.9432	9.29205	9.58924	8.80007	8.75103	8.7569	8.93604	9.53312				8.73744	9.38778		9.27298
Q9QXV8	Q9QXV8	Spry2	Protein sprouty homolog 2	sp|Q9QXV8|SPY2_MOUSE Protein sprouty homolog 2 OS=Mus musculus OX=10090 GN=Spry2 PE=1 SV=1	34.6	2	7	12.8475	13.0765	12.9355	13.1306	12.8687	12.8441	12.9253	13.4218	13.2943	13.4441		12.4084	12.9535	13.2024	12.9607	13.1576	13.0511	13.0437	12.1668	12.0751	13.1134	12.9401	13.0851	13.1078	12.2961	12.7994	13.0343	12.8819	13.0837	12.8173	12.7963	12.8827	13.382	13.2512	13.4054		12.4011	12.9174	13.1537	12.9254	13.1392	13.0227
C0HKG5	C0HKG5;C0HKG6	Rnaset2a	Ribonuclease T2-A	sp|C0HKG5|RNT2A_MOUSE Ribonuclease T2-A OS=Mus musculus OX=10090 GN=Rnaset2a PE=1 SV=1	29.59	2	7.3	14.2944	13.904	14.9411	14.16	13.7582	14.4542	13.7917	14.155	13.9977	14.0746	13.8868		13.7625	14.1651	14.3744	13.8727	14.1383	13.7708	14.4569	14.1553	14.3443	14.1798	14.1001	13.9499	13.7734	14.6613	14.2769	15.3025	14.5281	14.1219	14.8214	14.1641	14.5303	14.3696	14.451	14.2719		14.1415	14.5315	14.7542	14.2693	14.5249
Q8BWP8	Q8BWP8	B4gat1	Beta-1,4-glucuronyltransferase 1	sp|Q8BWP8|B4GA1_MOUSE Beta-1,4-glucuronyltransferase 1 OS=Mus musculus OX=10090 GN=B4gat1 PE=1 SV=1	47.35	2	6.5	14.9514	14.9854	15.0801	15.0403	14.9064	14.8432	15.0616	15.2107	15.1699	15.2174	14.6419		15.0582	15.0136	15.1833	14.9254	15.0663	15.1235	14.9484	14.8503	15.2772	15.2541	15.123	15.1666	15.245	14.5813	14.6212	14.7046	14.6715	14.5331	14.4735	14.697	14.8491	14.8049	14.8567	14.2902		14.7002	14.643	14.8261	14.5851	14.716
E9PY46	E9PY46	Ift140	Intraflagellar transport protein 140 homolog	sp|E9PY46|IF140_MOUSE Intraflagellar transport protein 140 homolog OS=Mus musculus OX=10090 GN=Ift140 PE=1 SV=1	165.77	6	6.6	15.0966	15.0732	15.1165	15.0018	14.9823	15.1278	14.6414	15.3389	14.81	15.3444	14.8568		14.844	14.7167	15.1202	15.0019	14.8442	14.7828	15.0102	14.6445	14.9835	14.8369	14.9769	14.7257	15.1224	12.7818	12.7642	12.7962	12.6881	12.6642	12.8132	12.332	13.0324	12.5002	13.0389	12.5602		12.5411	12.4013	12.8181	12.7167	12.549
P07310	P07310	Ckm	Creatine kinase M-type	sp|P07310|KCRM_MOUSE Creatine kinase M-type OS=Mus musculus OX=10090 GN=Ckm PE=1 SV=1	43.02	4	10.8	14.0155	14.0475	14.7528	14.0707	14.6116	14.7561	14.2447	13.1124	13.7249	13.7417	14.2095	12.8635	14.2959	13.7312	13.9943	13.9873	12.8961	13.853	13.1359		14.2143	14.0374	14.1344	15.2663	14.8699	13.6455	13.6834	14.3773	13.7019	14.2384	14.3864	13.8801	12.7507	13.3599	13.3811	13.8577	12.5342	13.9379	13.3607	13.6371	13.647	12.5458
P70255	P70255	Nfic	Nuclear factor 1 C-type	sp|P70255|NFIC_MOUSE Nuclear factor 1 C-type OS=Mus musculus OX=10090 GN=Nfic PE=1 SV=1	48.74	3	8.2	16.1548	16.3343	16.5341	16.2495	16.3482	16.181	16.2369	16.4955	16.4394	16.488	15.8812		16.3532	16.3265	16.1717	16.3898	16.4382	16.3798	16.4218	16.1308	16.2899	16.456	16.4562	16.58		15.6473	15.8326	16.0211	15.7432	15.8375	15.6737	15.7349	15.9963	15.9369	15.9899	15.3919		15.8577	15.8185	15.677	15.912	15.9503
Q99MJ9	Q99MJ9	Ddx50	ATP-dependent RNA helicase DDX50	sp|Q99MJ9|DDX50_MOUSE ATP-dependent RNA helicase DDX50 OS=Mus musculus OX=10090 GN=Ddx50 PE=2 SV=1	82.12	3	6	12.9606	13.2009	13.3612	13.6636	12.9811	13.2972	12.7758	13.5531	13.4615	13.5592	12.0774	11.8563	13.1834	13.5795	13.0643	12.0238	11.7526	12.4522	12.86	12.8399	13.6155	13.0629	14.0207	13.0876	12.9736	11.6646	11.9108	12.0596	12.3687	11.6818	12.0015	11.4853	12.2654	12.1705	12.2726	10.7996	10.601	11.8994	12.2829	11.7811	10.7575	10.4763
Q64373	Q64373	Bcl2l1	Bcl-2-like protein 1	sp|Q64373|B2CL1_MOUSE Bcl-2-like protein 1 OS=Mus musculus OX=10090 GN=Bcl2l1 PE=1 SV=1	26.12	2	15	13.1998	13.4816	13.4222	14.0603	13.8893	13.4093	13.4467	13.6781	13.6822	13.7095		13.0664	13.1623	13.9318	13.7543	13.2306	13.2733	13.6421	12.8203	12.2785	13.007	13.3155	13.8336	14.3183	13.4709	13.8297	14.1175	14.0467	14.6914	14.516	14.0395	14.0822	14.3164	14.3172	14.3489		13.7371	13.8043	14.5613	14.397	13.8903	13.9229
Q9JI13	Q9JI13	Utp3	Something about silencing protein 10	sp|Q9JI13|SAS10_MOUSE Something about silencing protein 10 OS=Mus musculus OX=10090 GN=Utp3 PE=1 SV=1	53.37	2	6.2	13.0085	13.0899	13.1212	13.2735	12.9306	12.9128	12.8566	13.4473	13.3442	13.1886	12.4777	12.0345	13.1397	12.794	13.1185	12.7266		12.6922	13.0218	12.9289	13.2762	12.7976	13.4727	13.0471	12.9734	12.9604	13.0477	13.0676	13.2266	12.8792	12.865	12.814	13.4076	13.3011	13.1499	12.4478	12.0272	13.1037	12.7454	13.0832	12.7082
Q9DAT5	Q9DAT5	Trmu	Mitochondrial tRNA-specific 2-thiouridylase 1	sp|Q9DAT5|MTU1_MOUSE Mitochondrial tRNA-specific 2-thiouridylase 1 OS=Mus musculus OX=10090 GN=Trmu PE=1 SV=1	47.21	3	8.6	13.7385	13.5887	13.8966	13.9435	13.9003	13.5993	13.8099	13.9868	13.5299	13.8429		13.4362	13.6868	13.5481	13.9468	13.5219	13.8804	13.7125	13.7102	12.9802	13.5268	13.7712	13.699	13.8344	13.6197	12.9355	12.7916	13.0882	13.1417	13.0941	12.7966	13.0124	13.1922	12.7319	13.0493		12.674	12.8959	12.7446	13.1566	12.7487	13.097
Q91WZ8	Q91WZ8	Dtnbp1	Dysbindin	sp|Q91WZ8|DTBP1_MOUSE Dysbindin OS=Mus musculus OX=10090 GN=Dtnbp1 PE=1 SV=1	39.63	3	12.8	13.2952	13.1281	13.2398	13.5311	13.422	13.2014	13.1172	13.3405	13.2997	13.9433	12.8074	12.9318	13.237	13.1649		13.061	12.8767	13.0101	12.5339	13.187	12.9706	13.2488	13.0582	12.883	12.7364	14.0772	13.916	14.0163	14.3142	14.2007	13.9837	13.9047	14.1308	14.0867	14.7346	13.6076	13.7546	14.0311	13.9463		13.8727	13.6783
Q8BR86	Q8BR86	Kirrel3	Kin of IRRE-like protein 3	sp|Q8BR86|KIRR3_MOUSE Kin of IRRE-like protein 3 OS=Mus musculus OX=10090 GN=Kirrel3 PE=1 SV=1	85.35	5	9.5	13.6342	13.9984	13.7309	13.9755	13.7403	14.0343	13.7066	13.9412	13.5109	14.2905		13.5598	13.4113	13.7455	13.7943	13.3486	13.7351	13.5588	13.8897	12.5424	13.8485	13.8058	13.8185	13.4054	13.8337	12.6319	13.002	12.7231	12.9744	12.7348	13.0323	12.7098	12.9473	12.5136	13.2976		12.5983	12.4211	12.7427	12.8048	12.3761	12.7524
Q8BXG3	Q8BXG3	Ift57	Intraflagellar transport protein 57 homolog	sp|Q8BXG3|IFT57_MOUSE Intraflagellar transport protein 57 homolog OS=Mus musculus OX=10090 GN=Ift57 PE=1 SV=1	48.74	4	12.4	11.6425	11.592	11.7696	11.7774	11.6328	11.2137	11.4588	11.4009	11.7034	11.5759	10.7461		11.429	11.6603	11.6655	11.603	11.2524		11.3203	11.3193	11.8814	11.695	11.6163	11.564	11.7104	11.0094	10.9649	11.131	11.1456	10.9965	10.581	10.8312	10.7762	11.0754	10.9522	10.1313		10.808	11.0267	11.0452	10.9996	10.639
P70279	P70279	Surf6	Surfeit locus protein 6	sp|P70279|SURF6_MOUSE Surfeit locus protein 6 OS=Mus musculus OX=10090 GN=Surf6 PE=1 SV=1	41.21	3	8.5		11.7748	12.4004	12.5458	12.5828	13.3741	12.179	11.7233	12.5605	12.1624			12.2555	12.6015	12.1905		11.3887	11.2578	12.421	11.8925	12.8031	12.2759	12.6607	12.4111	11.5669		11.4847	12.0989	12.251	12.2835	13.0784	11.8884	11.4356	12.2695	11.8758			11.9715	12.305	11.9073		11.1123
Q8K4T5	Q8K4T5	Dusp19	Dual specificity protein phosphatase 19	sp|Q8K4T5|DUS19_MOUSE Dual specificity protein phosphatase 19 OS=Mus musculus OX=10090 GN=Dusp19 PE=2 SV=1	24.17	2	8.6	13.0938	13.3435	13.6159	13.6057	13.1113	13.0875	12.6335	13.4068	13.6007	13.8076	12.7148	12.3541	13.2693	13.1125	12.9212	12.7052	11.7338	13.2682	12.1428	12.1718	12.3595	11.952	12.7393	12.5961	12.7899	13.7238	13.9794	14.2404	14.2368	13.738	13.7177	13.2689	14.0451	14.2357	14.4469	13.363	13.0249	13.9114	13.7419	13.564	13.3649	12.3835
Q68FF7	Q68FF7	Slain1	SLAIN motif-containing protein 1	sp|Q68FF7|SLAI1_MOUSE SLAIN motif-containing protein 1 OS=Mus musculus OX=10090 GN=Slain1 PE=1 SV=1	61.27	2	7.1	12.4515	12.3138	12.2493	12.1936	12.1443	12.2461	12.2188	12.1754	13.9276	11.9959	11.1487	11.1463	12.0934	11.7054	11.8102	12.4265	12.4715	12.1069	11.1507	10.9526	12.506	12.3092	11.6753	12.3679	12.2549	11.8799	11.748	11.6721	11.6232	11.5694	11.6748	11.6527	11.6121	13.361	11.4336	10.5952	10.6155	11.5338	11.1332	11.2513	11.8846	11.9196
Q2WF71	Q2WF71	Lrfn1	Leucine-rich repeat and fibronectin type III domain-containing protein 1	sp|Q2WF71|LRFN1_MOUSE Leucine-rich repeat and fibronectin type III domain-containing protein 1 OS=Mus musculus OX=10090 GN=Lrfn1 PE=1 SV=1	81.89	4	6.1	14.6206	14.5132	14.4494	14.5685	14.305	14.4424	14.3666	15.0189	14.5586	14.9699		14.1065	14.7623	14.5411	14.2238	14.4137	14.4892	14.7154	14.0092	14.2015	14.5919	14.6739	14.9153	14.6909	14.7829	13.4432	13.3417	13.2665	13.3924	13.1244	13.2654	13.1947	13.8498	13.3863	13.8019		12.9699	13.5969	13.3632	13.0593	13.2661	13.3315
O70145	O70145	Ncf2	Neutrophil cytosol factor 2	sp|O70145|NCF2_MOUSE Neutrophil cytosol factor 2 OS=Mus musculus OX=10090 GN=Ncf2 PE=1 SV=1	59.45	2	3.8	12.7761	12.9384	13.1226	13.0875	12.9021	12.9119	12.7387	12.6865	13.0731	13.0594	12.3899	12.237	13.0785	12.9289	13.1825	12.9493	12.4731		12.9277							11.7738	11.942	12.1148	12.0864	11.8966	11.91	11.7419	11.6926	12.0759	12.0665	11.4058	11.2755	12.0882	11.926	12.1931	11.9767	11.4905
Q08122	Q08122	Tle3	Transducin-like enhancer protein 3	sp|Q08122|TLE3_MOUSE Transducin-like enhancer protein 3 OS=Mus musculus OX=10090 GN=Tle3 PE=1 SV=3	83.39	2	3	13.6889	14.1301	13.9697	13.9602	13.9609	13.927	13.7079	13.9185	14.1588	13.9286		13.637	14.0627	13.8871	13.9996	13.7309	13.7809	13.6125	13.711	13.79	14.1065	14.2161	14.0811	13.9523	14.2756	12.4709	12.918	12.7462	12.7433	12.7396	12.7092	12.4953	12.7088	12.9458	12.72		12.4598	12.8567	12.6686	12.7944	12.5426	12.5826
Q8R3C0	Q8R3C0	Mcmbp	Mini-chromosome maintenance complex-binding protein	sp|Q8R3C0|MCMBP_MOUSE Mini-chromosome maintenance complex-binding protein OS=Mus musculus OX=10090 GN=Mcmbp PE=1 SV=1	72.84	2	3	12.5542	12.346	12.7989		12.5771	12.2473	12.1909	12.3867	12.5949	11.7844	11.7721		12.1952		12.3745	12.4385	12.615	12.0159		12.111	12.3514	12.3145	12.0414	12.4112	12.8546	11.5992	11.3969	11.8384		11.6189	11.2927	11.2414	11.4401	11.645	10.8388	10.8353		11.2523		11.4323	11.5133	11.6797
Q8BGR8	Q8BGR8	Gskip	GSK3B-interacting protein	sp|Q8BGR8|GSKIP_MOUSE GSK3B-interacting protein OS=Mus musculus OX=10090 GN=Gskip PE=2 SV=1	15.63	2	30.9	17.8999	17.8033	16.9918	17.0569	17.5319	16.8167	16.4639	17.3053	16.7157	17.4156	16.1651	16.2022	16.7341	16.9828	17.143	16.8874	16.7359	16.4545	16.3473	15.5515	16.7079	16.8543	15.8021	16.8451	16.8374	19.8518	19.7611	18.9382	19.01	19.4806	18.7689	18.4213	19.2655	18.6727	19.3769	18.1352	18.1949	18.698	18.9342	19.1077	18.869	18.7075
P01887	P01887	B2m	Beta-2-microglobulin	sp|P01887|B2MG_MOUSE Beta-2-microglobulin OS=Mus musculus OX=10090 GN=B2m PE=1 SV=2	13.77	3	22.7	16.101	15.1713	16.9736	15.9579	16.1397	14.7681	15.0793	14.8081	16.4631	15.2576	12.07	14.4286	15.4159	15.8388	16.5334	14.9152	13.6564	15.2872	15.6997	16.085	14.0149	14.2942	13.6978	13.6564	13.9885	17.2456	16.3218	18.1126	17.1037	17.281	15.913	16.2294	15.961	17.6126	16.4116	13.2328	15.614	16.5725	16.9828	17.6907	16.0895	14.8207
A0A075B5V1	A0A075B5V1	Ighv1-31	Immunoglobulin heavy variable 1-31	tr|A0A075B5V1|A0A075B5V1_MOUSE Immunoglobulin heavy variable 1-31 OS=Mus musculus OX=10090 GN=Ighv1-31 PE=4 SV=1	10.96	2	23.5	16.0394	16.3113	16.674	15.5669	15.3254	13.5313	15.2948	13.1298	14.2452	16.5732	16.5375	16.2571	14.5274	12.1737	12.3802	15.0583	14.1455	14.8437	14.2032	15.8157	13.091	13.4001	13.7907		12.0797	17.4064	17.6842	18.0355	16.9351	16.6891	14.8985	16.6673	14.5051	15.6172	17.9495	17.9227	17.6648	15.9064	13.5402	13.76	16.455	15.5321
P14847	P14847	Crp	C-reactive protein	sp|P14847|CRP_MOUSE C-reactive protein OS=Mus musculus OX=10090 GN=Crp PE=1 SV=2	25.34	2	9.8	13.1643	14.3316	13.9259	12.9551	12.9918	13.7581	13.5794	12.0589	13.2507	13.1585	13.6583		12.6775	13.0153	12.3336	12.3176	14.1648	12.217	13.7209	13.2247						13.9463	15.1195	14.7024	13.7383	13.7705	14.5404	14.3669	12.8492	14.0377	13.9498	14.4585		13.4715	13.7968	13.1284	13.1293	14.9665
Q8JZW5	Q8JZW5	Sh2d5	SH2 domain-containing protein 5	sp|Q8JZW5|SH2D5_MOUSE SH2 domain-containing protein 5 OS=Mus musculus OX=10090 GN=Sh2d5 PE=1 SV=3	47.35	3	7.9	15.4574	15.2384	15.3263	15.7022	15.5056	15.3919	14.9704	15.6384	15.3169	15.7804	15.1866	14.9518	15.4425	15.3514	15.3297	15.5931	15.3335	15.5099	15.2671		15.5171	14.0499	15.4164	15.3996	15.4936	14.9499	14.7368	14.8133	15.1959	14.9948	14.8847	14.4683	15.1393	14.8144	15.2822	14.6973	14.4851	14.947	14.8434	14.835	15.1153	14.8456
Q91W61	Q91W61	Fbxl15	F-box/LRR-repeat protein 15	sp|Q91W61|FXL15_MOUSE F-box/LRR-repeat protein 15 OS=Mus musculus OX=10090 GN=Fbxl15 PE=1 SV=2	33.1	2	6.3	16.2871	16.4959	16.3848	16.5746	16.4319	16.2846	16.3729	16.4703	16.6597	16.5975	16.2073		16.5224	16.4543	16.5126	16.4184	16.5043	16.5816	16.5102	16.5431	16.2676	16.5648	16.7341	16.7433	16.7753	16.3321	16.5469	16.4243	16.6209	16.4736	16.3299	16.4234	16.5236	16.7097	16.6519	16.2705		16.5794	16.4988	16.5704	16.4932	16.569
Q9D3S3	Q9D3S3	Snx29	Sorting nexin-29	sp|Q9D3S3|SNX29_MOUSE Sorting nexin-29 OS=Mus musculus OX=10090 GN=Snx29 PE=1 SV=2	91.33	2	2.6	12.7347	12.5512	12.928		12.7363	12.7526		12.9758		13.1844			12.8806	13.0462	13.1396					12.7476	12.8066		13.3637			11.163	10.9855	11.3509		11.1614	11.1812		11.4124		11.6221			11.321	11.474	11.5808
P62700	P62700	Ypel5	Protein yippee-like 5	sp|P62700|YPEL5_MOUSE Protein yippee-like 5 OS=Mus musculus OX=10090 GN=Ypel5 PE=1 SV=1	13.83	2	21.5	13.2465	13.1508	12.7393	12.225	12.0713	12.7328	12.9943	12.9469	12.8215	12.2609	12.609	12.8519	12.3571	11.5951	11.5968	12.3763	12.4757	11.4253	11.7444	11.538	12.4637	12.3791	11.7286	11.1453	12.7863	14.3911	14.3013	13.8783	13.3708	13.2126	13.8777	14.1443	14.0998	13.9711	13.4149	13.7718	14.0372	13.5137	12.7391	12.7542	13.5505	13.6399
Q3TH73	Q3TH73	Ttyh2	Protein tweety homolog 2	sp|Q3TH73|TTYH2_MOUSE Protein tweety homolog 2 OS=Mus musculus OX=10090 GN=Ttyh2 PE=1 SV=1	58.97	3	8.8	15.0822	15.3161	15.266	15.3221	15.0486	15.3073	15.2372	15.2582	15.5614	15.3471	15.0204	14.6921	14.916	15.1569	15.2744	15.088		15.1215	14.9052	14.8105	14.4027	14.2749	14.4796	14.798	14.5654	14.9467	15.1865	15.125	15.1877	14.9098	15.172	15.1071	15.1309	15.4308	15.2209	14.9031	14.5974	14.7925	15.0208	15.1516	14.9822
Q6DFW5	Q6DFW5	Atp11b	Phospholipid-transporting ATPase IF	sp|Q6DFW5|AT11B_MOUSE Phospholipid-transporting ATPase IF OS=Mus musculus OX=10090 GN=Atp11b PE=1 SV=1	133.45	2	1.8	13.0518		13.5147	13.0646	12.8151		13.071	13.3018				13.4153		13.0091	13.1973			12.9063	13.1603		13.4448	13.0009	13.7026		13.5192	11.2488		11.7063	11.2628	11.0088		11.2735	11.5072				11.6531		11.2056	11.4071
Q8BLR9	Q8BLR9	Hif1an	Hypoxia-inducible factor 1-alpha inhibitor	sp|Q8BLR9|HIF1N_MOUSE Hypoxia-inducible factor 1-alpha inhibitor OS=Mus musculus OX=10090 GN=Hif1an PE=1 SV=2	40.22	2	5.7	13.3147	12.2953		13.0072	13.0054	13.5444	13.1201	13.1694	12.9008				12.8094	12.41	12.9409	12.4007		13.2203	13.158		13.2117	12.9767	12.6882	13.2773		13.3597	12.3462		13.0534	13.0472	13.5897	13.1706	13.2228	12.9508				12.8665	12.4545	12.9988	12.4755
Q07646	Q07646	Mest	Mesoderm-specific transcript protein	sp|Q07646|MEST_MOUSE Mesoderm-specific transcript protein OS=Mus musculus OX=10090 GN=Mest PE=2 SV=1	38.88	2	9	13.1897	13.0513	14.0819	13.5258	13.6029	13.322	12.9416	13.2499	13.4171	13.5774	12.4742		12.808	14.0263	13.6984	12.1628	13.1261	13.021	13.4362	12.5596	13.6493	13.5095	13.797	13.4584	13.459	13.6822	13.5497	14.5689	14.0195	14.0921	13.8148	13.4396	13.7508	13.9145	14.0793	12.9849		13.3125	14.5183	14.2036	12.685	13.6383
Q8BWW4	Q8BWW4	Larp4	La-related protein 4	sp|Q8BWW4|LARP4_MOUSE La-related protein 4 OS=Mus musculus OX=10090 GN=Larp4 PE=1 SV=2	79.71	2	4.9	14.0237	13.8373	14.5382			13.6951	13.4428	14.3695		14.4079				14.2931	14.1625		13.9998	13.9624	14.0888	13.8464	13.9589	14.0242	13.8842	14.2501	14.2562	13.2752	13.0947	13.7842			12.9469	12.6998	13.6293		13.6687				13.544	13.4268		13.271
O35516	O35516	Notch2	Neurogenic locus notch homolog protein 2	sp|O35516|NOTC2_MOUSE Neurogenic locus notch homolog protein 2 OS=Mus musculus OX=10090 GN=Notch2 PE=1 SV=2	265.45	2	0.8	12.2611	12.6727	13.5503	12.8645	11.9979	12.6991	12.2425	12.9079	13.3837	12.8514	11.5952	11.8854	12.6434	13.12	13.1991	12.4174	11.988	12.5604	12.5025		12.7593	12.9537	13.0539	13.2005	12.619	9.85542	10.273	11.1391	10.4601	9.589	10.2937	9.84236	10.5106	10.9831	10.4551	9.20779	9.5205	10.2498	10.7138	10.8063	10.0415	9.60199
Q9WVL3	Q9WVL3	Slc12a7	Solute carrier family 12 member 7	sp|Q9WVL3|S12A7_MOUSE Solute carrier family 12 member 7 OS=Mus musculus OX=10090 GN=Slc12a7 PE=1 SV=1	119.4	2	2.1	14.3607	14.1468	14.3246	14.4877	14.4408	14.1736	14.4061	14.6139	14.4755	14.687	13.6463	13.6164	14.3481	14.3321	14.599		13.9136	14.6275	13.5784	13.8548	14.2506	14.064	14.4107	14.5408	14.4429	12.8207	12.6128	12.7791	12.9489	12.8976	12.6339	12.8717	13.0824	12.9405	13.1565	12.1246	12.1172	12.8202	12.7917	13.0719		12.3933
Q810D6	Q810D6	Grwd1	Glutamate-rich WD repeat-containing protein 1	sp|Q810D6|GRWD1_MOUSE Glutamate-rich WD repeat-containing protein 1 OS=Mus musculus OX=10090 GN=Grwd1 PE=1 SV=2	49.19	2	7	12.3699	12.9009	13.4191	13.4351	12.9802	12.6264	12.5717	13.2552	13.2005	13.4242	10.899	11.764	12.9747	12.9707	13.172	12.8303	12.3236	13.0384	11.7223	12.0003	12.3877	12.6552	12.733	12.8223	12.9948	11.9998	12.5368	13.0436	13.0663	12.6069	12.2566	12.2071	12.8936	12.8355	13.0635	10.5472	11.4348	12.6167	12.6002	12.8148	12.49	11.9733
Q8K409	Q8K409	Polb	DNA polymerase beta	sp|Q8K409|DPOLB_MOUSE DNA polymerase beta OS=Mus musculus OX=10090 GN=Polb PE=1 SV=3	38.26	3	11.3		13.3454	13.4758	13.6389	13.7505	13.244	13.2483	13.6655	13.5759	13.8731		13.0311	13.3838	13.6099	13.632	13.102	12.5042	13.4595	13.787			13.4601	13.6269	13.5453	13.4536		13.1333	13.2523	13.4221	13.5292	13.0263	13.0357	13.4558	13.3629	13.6645		12.8539	13.1778	13.3914	13.4268	12.9137	12.3059
P62257	P62257	Ube2h	Ubiquitin-conjugating enzyme E2 H	sp|P62257|UBE2H_MOUSE Ubiquitin-conjugating enzyme E2 H OS=Mus musculus OX=10090 GN=Ube2h PE=1 SV=1	20.64	4	25.7	14.1421	14.1877	14.1777	14.114	13.9927	14.1776	14.0102	14.1798	14.3436	14.3272	13.6962	13.3785	13.8832	14.2263		13.6906	14.1071	14.2015	13.955	13.3184	13.9383	13.9201	14.2182	14.1465	13.671	15.2866	15.3382	15.3168	15.2598	15.134	15.3224	15.1602	15.3327	15.4932	15.4811	14.8589	14.5638	15.0398	15.3703		14.8649	15.2713
Q99N92	Q99N92	Mrpl27	Large ribosomal subunit protein bL27m	sp|Q99N92|RM27_MOUSE Large ribosomal subunit protein bL27m OS=Mus musculus OX=10090 GN=Mrpl27 PE=1 SV=1	15.93	3	23.6	13.8829	13.6722	14.4849	13.9125	14.15	13.8525	13.8069	14.6136	14.3387	14.6527	13.7915	13.5915	14.1259	14.1214	14.2787	13.9177		13.8688	13.8674	13.8174	13.9461	14.1199		14.1813	14.3081	14.8349	14.63	15.4313	14.8656	15.0987	14.8047	14.7643	15.5738	15.2956	15.6139	14.7616	14.5842	15.0898	15.0728	15.2434	14.8994
Q6DFV5	Q6DFV5	Helz	Probable helicase with zinc finger domain	sp|Q6DFV5|HELZ_MOUSE Probable helicase with zinc finger domain OS=Mus musculus OX=10090 GN=Helz PE=1 SV=2	219.74	2	0.9	12.9348	12.8711	12.8306	13.1253	12.8529	12.5525	12.6281		13.2387	13.0466	12.2611	12.3993		13.1351	12.9725	12.7026	12.6518	12.9014		12.4586	12.8174	12.9828	13.0219	12.8516	13.2733	10.411	10.3532	10.3013	10.6027	10.3258	10.0289	10.1098		10.7199	10.5322	9.75551	9.91622		10.6108	10.4614	10.2085	10.1476
Q9D142	Q9D142	Nudt14	Uridine diphosphate glucose pyrophosphatase NUDT14	sp|Q9D142|NUD14_MOUSE Uridine diphosphate glucose pyrophosphatase NUDT14 OS=Mus musculus OX=10090 GN=Nudt14 PE=1 SV=1	24.43	2	12.2	14.1731	14.811	14.2305	13.3114	13.6543	14.3548	14.3908	13.5509	13.9436	13.5035	13.7079	14.0097	13.5857		13.9195	13.809	14.1393	13.4477	13.8391	12.5433	13.769	14.1638	13.5372	13.217	12.2596	14.9551	15.5989	15.0069	14.0946	14.4331	15.1371	15.1782	14.3412	14.7306	14.2949	14.5081	14.8325	14.3798		14.7143	14.6207	14.9409
Q80YN3	Q80YN3	Bcas1	Breast carcinoma-amplified sequence 1 homolog	sp|Q80YN3|BCAS1_MOUSE Breast carcinoma-amplified sequence 1 homolog OS=Mus musculus OX=10090 GN=Bcas1 PE=1 SV=3	67.34	6	16.9	17.8248	18.2868	18.3924	18.846	18.8156	18.3981	18.0011	17.9116	18.6209	18.5461	17.5869	16.6213	17.9692	18.5679	18.423	17.5035	17.6867	17.011	17.9827	17.9266	18.1755	17.7049	18.5638	18.1989	17.0378	16.6892	17.1572	17.2513	17.7116	17.6768	17.2628	16.871	16.7844	17.4904	17.42	16.4696	15.5265	16.8456	17.4318	17.3003	16.3977	16.5708
Q8QZV7	Q8QZV7	IntS13	Integrator complex subunit 13	sp|Q8QZV7|INT13_MOUSE Integrator complex subunit 13 OS=Mus musculus OX=10090 GN=IntS13 PE=1 SV=2	82.73	5	7.4	13.4851	13.709	13.9306	13.9992	13.8204	13.5785	13.6	13.7801	14.0358	14.0443	13.1374		13.8274	13.738	13.9159	13.8347	13.5452	13.9699	13.5646	13.5812	13.7155	13.8073	14.0676	13.9415	13.9829	11.9134	12.1433	12.3534	12.4287	12.2455	12.0072	12.0338	12.2168	12.4692	12.4821	11.5839		12.2678	12.1658	12.3571	12.2928	11.9932
Q9CXF7	Q9CXF7	Chd1l	Chromodomain-helicase-DNA-binding protein 1-like	sp|Q9CXF7|CHD1L_MOUSE Chromodomain-helicase-DNA-binding protein 1-like OS=Mus musculus OX=10090 GN=Chd1l PE=1 SV=1	101.37	2	2.6	11.6403	11.8433	12.2717	11.96	12.2204	11.9611	11.7945	12.3355	12.4994	12.4849			11.9829	12.2484	12.6037	11.9177	11.9219	11.8096		11.9605	11.9543	11.866	12.3547	12.3615	12.1406	10.1659	10.3749	10.7918	10.4868	10.7428	10.487	10.3256	10.8695	11.0301	11.0199			10.5206	10.7736	11.1421	10.473	10.4672
Q05AA6	Q05AA6	Drp2	Dystrophin-related protein 2	sp|Q05AA6|DRP2_MOUSE Dystrophin-related protein 2 OS=Mus musculus OX=10090 GN=Drp2 PE=1 SV=1	107.98	3	4.3	12.7962	13.132	12.397	12.6943	12.4033		11.8784	12.4368	13.0491	12.9732	12.2386	12.2807	12.3053	11.9785	12.9137	13.1161				11.237	11.8612	12.2995	12.4658	11.9709	12.8981	11.1935	11.5352	10.7888	11.0928	10.7974		10.2812	10.8424	11.4514	11.3799	10.6541	10.7188	10.7147	10.3753	11.3238	11.5432
Q9JIZ9	Q9JIZ9	Plscr3	Phospholipid scramblase 3	sp|Q9JIZ9|PLS3_MOUSE Phospholipid scramblase 3 OS=Mus musculus OX=10090 GN=Plscr3 PE=1 SV=1	31.78	3	10.1	15.27	15.4054	15.4384	15.5341	15.3289	15.2363	15.1683	15.585	15.7717	15.8816	14.3075	14.2079	15.3861	14.779	15.0936	15.0594	15.2417	15.4747	14.3426	14.4662	15.3694	14.9092	14.9834	15.0621	15.5207	15.9	16.0413	16.0628	16.1653	15.9556	15.8666	15.8038	16.2234	16.4067	16.5209	14.9557	14.8787	16.0281	15.4085	15.7364	15.7191	15.8913
A2ABV5	A2ABV5	Med14	Mediator of RNA polymerase II transcription subunit 14	sp|A2ABV5|MED14_MOUSE Mediator of RNA polymerase II transcription subunit 14 OS=Mus musculus OX=10090 GN=Med14 PE=1 SV=1	160.86	2	2.3	12.4423	12.4647	12.4617	12.8896		12.4596	12.656	12.8338	12.8336	12.9143			12.64	12.7357	12.6775	12.5399	12.6412	12.6839	11.7046	11.1895	12.6382	12.9625	13.0642	12.9417	12.9119	10.3068	10.3351	10.3207	10.7552		10.3243	10.5259	10.7066	10.7031	10.7882			10.5165	10.5997	10.5547	10.4341	10.5253
Q8BSQ9	Q8BSQ9	Pbrm1	Protein polybromo-1	sp|Q8BSQ9|PB1_MOUSE Protein polybromo-1 OS=Mus musculus OX=10090 GN=Pbrm1 PE=1 SV=4	187.07	4	3	13.6026	13.6884	13.7684	13.8794	13.7627	13.8524	13.7203	13.7544	14.0992	13.7969	13.1959	12.8768	13.6502	13.9911	13.6933		13.3895	13.7593	13.783	13.3877	13.6869	13.5699	13.9941	13.8636	13.6922	11.197	11.2887	11.3573	11.475	11.3538	11.447	11.3201	11.3571	11.6986	11.4006	10.8085	10.5119	11.2566	11.585	11.3004		11.0035
Q9CPW2	Q9CPW2	Fdx2	Ferredoxin-2, mitochondrial	sp|Q9CPW2|FDX2_MOUSE Ferredoxin-2, mitochondrial OS=Mus musculus OX=10090 GN=Fdx2 PE=1 SV=1	18.75	3	19.5	17.434	17.0431	17.4703	17.8514	17.256	17.2313	17.4426	17.6748	17.3945	18.0516	16.4734	16.0405	16.9555	17.2417	17.5939	17.1052	17.0442	17.3981	15.8531	16.9645	16.1547	17.1699	17.2075	16.9104	17.1144	18.0639	17.679	18.0948	18.4826	17.8827	17.8616	18.0781	18.3131	18.0295	18.6909	17.1216	16.7113	17.5976	17.8711	18.2367	17.7649	17.6939
Q9EQW7	Q9EQW7	Kif13a	Kinesin-like protein KIF13A	sp|Q9EQW7|KI13A_MOUSE Kinesin-like protein KIF13A OS=Mus musculus OX=10090 GN=Kif13a PE=1 SV=1	195.69	4	2.5	13.4974	13.8018	13.9833	13.8272	13.7724	13.7302	13.6122	13.5486	13.9637	13.953		13.5249	13.419	13.8469	14.0385	13.7276	13.4533	13.7524	13.7529	13.6792	13.6207	13.6162	13.7926	13.6529		11.1094	11.4198	11.5899	11.4405	11.3812	11.3425	11.2297	11.169	11.5807	11.5745		11.1778	11.0431	11.4585	11.6633	11.3694	11.0851
Q9JLM9	Q9JLM9	Grb14	Growth factor receptor-bound protein 14	sp|Q9JLM9|GRB14_MOUSE Growth factor receptor-bound protein 14 OS=Mus musculus OX=10090 GN=Grb14 PE=1 SV=1	60.53	3	8.9	13.4866	13.5581	13.3471	13.6295	13.5899	13.5518	13.5572	13.5365	13.8543	13.5777	13.4322	13.4134	13.2289	13.5712	13.3097		13.5869	13.496	13.4503	13.2046	13.3378	13.1723	13.5316	13.2537	13.4515	12.6312	12.7086	12.4861	12.7753	12.7312	12.6966	12.7072	12.6894	13.0039	12.7316	12.5949	12.5987	12.3855	12.7152	12.4671		12.7511
Q9CWB7	Q9CWB7		Glutaredoxin-like protein C5orf63 homolog	sp|Q9CWB7|YD286_MOUSE Glutaredoxin-like protein C5orf63 homolog OS=Mus musculus OX=10090 PE=1 SV=1	13.42	3	33.9	13.6767	14.0563	14.0432	13.8919	14.0133	13.8042	14.2196	14.1174	14.1479	14.0339	12.7388	12.8095	13.5221	13.5032	13.7984	13.9181	13.6252	13.6896	13.5548	12.6857	13.2194	12.8509	13.4776	12.8607	13.4047	14.4587	14.8442	14.8197	14.6751	14.792	14.5865	15.007	14.9077	14.9349	14.8252	13.539	13.6323	14.3161	14.2846	14.5931	14.7298	14.4269
Q8CII2	Q8CII2	Cdc123	Translation initiation factor eIF2 assembly protein	sp|Q8CII2|CD123_MOUSE Translation initiation factor eIF2 assembly protein OS=Mus musculus OX=10090 GN=Cdc123 PE=1 SV=2	38.79	7	24.4	14.7259	14.7798	14.5978	14.5803	14.5849	14.5437	14.5223	14.7841	14.7176	14.9942		14.6004	14.5961	14.4316	14.62	14.717	14.6327	14.6708	14.5599	14.5128	14.7504	14.5995	14.7624	14.5935	14.8089	14.7709	14.8308	14.6373	14.6266	14.6267	14.589	14.5728	14.8375	14.7676	15.0486		14.6862	14.6532	14.4761	14.6778	14.7917	14.6974
Q8K2A8	Q8K2A8	Alg3	Dol-P-Man:Man(5)GlcNAc(2)-PP-Dol alpha-1,3-mannosyltransferase	sp|Q8K2A8|ALG3_MOUSE Dol-P-Man:Man(5)GlcNAc(2)-PP-Dol alpha-1,3-mannosyltransferase OS=Mus musculus OX=10090 GN=Alg3 PE=1 SV=2	50.15	2	5.5	11.7441	12.1558	12.4571	11.8928	11.995		11.697	12.3986	12.2266	12.2565			11.9852	12.5071	12.3564	11.3119	11.9564	12.1254	10.5992	10.7708	12.2017	11.6605	12.3433	12.2465	12.0139	11.8886	12.3063	12.5961	12.0385	12.1363		11.847	12.5515	12.3762	12.4104			12.1418	12.6511	12.5137	11.4862	12.1206
A2A4P0	A2A4P0	Dhx8	ATP-dependent RNA helicase DHX8	sp|A2A4P0|DHX8_MOUSE ATP-dependent RNA helicase DHX8 OS=Mus musculus OX=10090 GN=Dhx8 PE=2 SV=1	142.48	3	3.7	11.4568	11.6369	11.5954	11.4967	11.1129	11.4851	11.4101	11.7316	11.8137	11.7066	10.7392		11.6215	11.471	11.4103	11.4093	11.367	11.503	10.5377	10.4217	11.7378	11.5696	11.8026	11.6465	11.6681	9.43144	9.61746	9.56454	9.47256	9.08427	9.46007	9.39024	9.71454	9.79333	9.69064	8.73201		9.60821	9.44507	9.39772	9.41367	9.36131
O35709	O35709	Enc1	Ectoderm-neural cortex protein 1	sp|O35709|ENC1_MOUSE Ectoderm-neural cortex protein 1 OS=Mus musculus OX=10090 GN=Enc1 PE=2 SV=2	66.07	2	4.1		12.0248	11.898			11.5224	11.7748	11.8297	12.5387	12.2311		11.9533					12.241	12.217	12.1057		12.0038	11.6941		11.8787	12.2134		10.6972	10.5591			10.1892	10.4468	10.5046	11.2102	10.907		10.6606					10.9272
P70196	P70196	Traf6	TNF receptor-associated factor 6	sp|P70196|TRAF6_MOUSE TNF receptor-associated factor 6 OS=Mus musculus OX=10090 GN=Traf6 PE=1 SV=2	60.03	2	4.5	12.4311	11.9736	13.74	12.705		13.8513	12.9575	13.1356	13.4258	13.148			13.3283	12.8784		13.1109	13.3309	12.9909	12.207	13.5062		13.2354	12.8877	13.3118		11.7392	11.2875	13.0425	12.0143		13.1597	12.271	12.452	12.7389	12.4655			12.6484	12.1859		12.4486	12.6586
Q8BIV3	Q8BIV3	Ranbp6	Ran-binding protein 6	sp|Q8BIV3|RNBP6_MOUSE Ran-binding protein 6 OS=Mus musculus OX=10090 GN=Ranbp6 PE=1 SV=3	124.51	2	1.4	14.6824	14.9708	15.1867	14.8587	14.9926	14.6044	14.8565	14.9481	15.0257	15.2007	14.5197	14.6118	14.9997	14.9055	15.0444	14.5451		14.9059	14.9852	14.6674	14.535	14.6096	14.8943	14.8277	15.0719	12.9064	13.2007	13.4052	13.0838	13.2134	12.8287	13.0859	13.1804	13.2547	13.4341	12.7619	12.8766	13.2358	13.129	13.2812	12.7988
Q61646	Q61646	Hp	Haptoglobin	sp|Q61646|HPT_MOUSE Haptoglobin OS=Mus musculus OX=10090 GN=Hp PE=1 SV=1	38.73	7	22.8	15.6649	13.4329					14.6031	14.3284	12.4747	11.1601			11.0869	16.0615	14.8469		13.6349									15.2949	13.0688					14.2385	13.9667	12.1097	10.7995			10.729	15.691	14.4897		13.2846
Q8C2L6	Q8C2L6	Tmem161b	Transmembrane protein 161B	sp|Q8C2L6|T161B_MOUSE Transmembrane protein 161B OS=Mus musculus OX=10090 GN=Tmem161b PE=2 SV=1	55.43	2	3.7	12.7472	13.0022	13.17	12.9421	12.9558	12.808	12.8573	13.1969	13.3369	13.4114		12.0886	12.9032	12.95	13.063	12.7781	13.002	13.0544	12.5168	12.5047	12.5592	12.8236	12.9381	12.6488	12.9502	12.2397	12.5006	12.657	12.4358	12.445	12.3008	12.3553	12.6977	12.8344	12.9133		11.6219	12.4077	12.4419	12.5683	12.3003	12.5141
Q2HXL6	Q2HXL6	Edem3	ER degradation-enhancing alpha-mannosidase-like protein 3	sp|Q2HXL6|EDEM3_MOUSE ER degradation-enhancing alpha-mannosidase-like protein 3 OS=Mus musculus OX=10090 GN=Edem3 PE=1 SV=2	104.13	2	2.3	11.7994	12.1189	12.4955	12.3276	12.3166	11.8791	11.8344	12.5044	12.5342	12.8729	11.6317		12.2489	12.4398	12.2626		11.5781	12.8056	12.1004	12.4143	12.2096	12.0551	12.7107	12.3498	12.6243	10.359	10.6844	11.0496	10.8884	10.8729	10.439	10.3995	11.0724	11.0988	11.4418	10.2095		10.8205	10.9988	10.835		10.1573
Q8VE18	Q8VE18	Smg8	Nonsense-mediated mRNA decay factor SMG8	sp|Q8VE18|SMG8_MOUSE Nonsense-mediated mRNA decay factor SMG8 OS=Mus musculus OX=10090 GN=Smg8 PE=1 SV=1	109.6	7	8.4	13.4454	13.2875	13.1679	13.2458	12.7039	13.2687	13.3127	13.267	13.5421	13.3705	12.7366		12.9675	13.2221	13.2996	13.1295	12.564	13.1651	12.7244	12.9081	13.1758	13.3236	13.1752	13.3471	13.1542	11.8427	11.6907	11.5597	11.6443	11.0979	11.6664	11.7155	11.6726	11.9444	11.7772	11.1521		11.3769	11.6189	11.7097	11.5566	10.981
Q9CZQ9	Q9CZQ9	Bbs5	Bardet-Biedl syndrome 5 protein homolog	sp|Q9CZQ9|BBS5_MOUSE Bardet-Biedl syndrome 5 protein homolog OS=Mus musculus OX=10090 GN=Bbs5 PE=1 SV=1	38.84	2	5.6	12.3232	12.1129	12.5309	12.3021	11.6421	12.1264	11.4153	11.2531		12.3884	11.3906	10.9998	11.3775	11.4616	11.3462	11.6528	11.3418	11.9657		10.1608	11.9821	11.6671	11.5961	10.9185	10.7468	12.1052	11.9008	12.3073	12.0853	11.4208	11.9087	11.2027	11.0434		12.1797	11.1908	10.8226	11.1716	11.2431	11.141	11.4645	11.1434
Q3TWW8	Q3TWW8	Srsf6	Serine/arginine-rich splicing factor 6	sp|Q3TWW8|SRSF6_MOUSE Serine/arginine-rich splicing factor 6 OS=Mus musculus OX=10090 GN=Srsf6 PE=1 SV=1	39	4	11.5	15.0549	15.1679	14.9763	15.1899	14.808	14.8658	15.0672	15.1889	15.4274	15.1661	13.7341	13.8338	14.7444	15.068	15.182	14.9576	14.9902	15.1307	13.4423	13.8656	14.9192	15.0697	15.2341	15.1981	14.9604	15.0999	15.2188	15.0158	15.2361	14.8498	14.9111	15.1177	15.2423	15.4774	15.2205	13.7973	13.9196	14.8015	15.1125	15.2398	15.0323	15.0549
Q91XB7	Q91XB7	Yif1a	Protein YIF1A	sp|Q91XB7|YIF1A_MOUSE Protein YIF1A OS=Mus musculus OX=10090 GN=Yif1a PE=1 SV=1	32.11	2	9.2	11.0137	11.6308	11.4438	11.094	11.3129	11.4089	11.4703		10.5534	11.0158		11.1564		10.973			10.6802		11.3079	10.6855	11.3	11.8253		11.4089	11.1489	11.9656	12.5886	12.3903	12.0471	12.2616	12.3611	12.4277		11.5103	11.9771		12.1491		11.9244			11.6518
Q7TPV4	Q7TPV4	Mybbp1a	Myb-binding protein 1A	sp|Q7TPV4|MBB1A_MOUSE Myb-binding protein 1A OS=Mus musculus OX=10090 GN=Mybbp1a PE=1 SV=2	151.94	13	10.4	13.3685	13.1505	13.8616	13.9775	13.5772	13.73	12.9473	13.3908	14.0021	13.7942	12.2868	12.6662	13.3699	14.2887	13.8627	12.1342	12.3485	12.5071	13.4643	12.9145	13.816	12.9432	13.8707	13.3125	13.2386	11.1706	10.9586	11.6582	11.7809	11.3761	11.5324	10.7549	11.2013	11.8093	11.6058	10.1072	10.5091	11.1841	12.0904	11.6776	9.96607	10.1703
A2A472	A2A472	Tox2	TOX high mobility group box family member 2	tr|A2A472|A2A472_MOUSE TOX high mobility group box family member 2 OS=Mus musculus OX=10090 GN=Tox2 PE=1 SV=1	57.76	2	6	13.9741	13.5135	13.6583	13.8059	13.801	13.751	13.1684	14.2522	13.9023	14.1194		13.5912	13.8862	13.7226	13.7334	13.2498	13.8889	13.6929	13.9626	13.7959	13.3837	12.9197	12.7868	14.2205	13.6327	13.6781	13.2234	13.3568	13.5111	13.5017	13.4553	12.8778	13.9645	13.6113	13.8327		13.336	13.6022	13.426	13.4502	12.9835	13.6126
Q8C6B0	Q8C6B0	Tmt1a	Methyltransferase like 7A1	tr|Q8C6B0|Q8C6B0_MOUSE Methyltransferase like 7A1 OS=Mus musculus OX=10090 GN=Tmt1a PE=1 SV=1	28.08	2	11.5	15.204	15.4064	15.0391	14.627	14.5019	15.0744	15.2757	14.7949	14.5933	14.4483	14.5367	14.4802	14.4155	14.0282	14.3494	15.0553	15.045	13.7916	13.5578	13.753	14.5754	14.715	13.8403	14.0836	13.1927	15.3486	15.5569	15.1781	14.7728	14.6432	15.2193	15.4257	14.9478	14.7429	14.6022	14.6995	14.6656	14.5721	14.1722	14.5067	15.2296	15.2092
Q9QXN3	Q9QXN3	Trip4	Activating signal cointegrator 1	sp|Q9QXN3|TRIP4_MOUSE Activating signal cointegrator 1 OS=Mus musculus OX=10090 GN=Trip4 PE=1 SV=2	66.16	3	7.1	13.2763	13.2946	13.5308	13.436	13.478	13.5584	13.1964	13.4838	13.5981	13.6811		13.1736	13.4512	13.3582	13.5329	13.4319	13.2512	13.3823	13.4076	13.1946	13.4562	13.3074	13.6045	13.4724	13.3217	12.3213	12.3455	12.5703	12.4823	12.5197	12.6038	12.2469	12.5372	12.6481	12.7355		12.2594	12.5083	12.4027	12.5907	12.5066	12.3159
Q9QXT8	Q9QXT8	Kcnip3	Calsenilin	sp|Q9QXT8|CSEN_MOUSE Calsenilin OS=Mus musculus OX=10090 GN=Kcnip3 PE=1 SV=2	29.44	4	15.2	14.3324	13.9674	14.1002	14.3294	13.938	14.1089	14.1402	14.8176	14.4066	14.7662	12.8592	13.1776	14.2098	14.4808	14.2028	13.9538	13.7466	14.3568	12.8536	13.1297	14.3523	14.3719	14.1873	14.3799	14.3763	14.6994	14.3402	14.4616	14.6976	14.3017	14.4762	14.5126	15.1928	14.7785	15.1425	13.2443	13.5853	14.5888	14.8472	14.5825	14.3505	14.1332
Q8CJF7	Q8CJF7	Ahctf1	Protein ELYS	sp|Q8CJF7|ELYS_MOUSE Protein ELYS OS=Mus musculus OX=10090 GN=Ahctf1 PE=1 SV=1	247.49	9	5.4	12.6856	12.8613	13.2347	13.1053	13.0036	12.9725	12.6564	12.8138	13.0297	13.1678		11.8011	12.6469	12.9329	13.1238	12.3864	12.6103	12.365	13.0084	12.7759	13.065	13.1225	13.2723	13.1191	12.8303	9.8173	9.99894	10.361	10.2382	10.1321	10.1045	9.79363	9.95383	10.1664	10.3089		8.97356	9.79068	10.0641	10.2683	9.54788	9.76173
Q9CQL4	Q9CQL4	Mrpl20	Large ribosomal subunit protein bL20m	sp|Q9CQL4|RM20_MOUSE Large ribosomal subunit protein bL20m OS=Mus musculus OX=10090 GN=Mrpl20 PE=1 SV=1	17.58	2	14.1	12.1335	12.549	12.4736	12.0431	12.4684	12.141	12.3139	12.7288	12.1705	12.5509	11.4635	11.957	11.9898	12.1325	11.7001	11.5746	12.0976	12.2151	12.1066	10.4306	12.0541	12.3083	11.9235	11.9164	12.3724	13.0854	13.5069	13.4201	12.9962	13.417	13.0932	13.2712	13.6891	13.1274	13.5121	12.4336	12.9497	12.9538	13.0839	12.6648	12.5563	13.0692
B1AUH1	B1AUH1	Ptpru	Receptor-type tyrosine-protein phosphatase U	sp|B1AUH1|PTPRU_MOUSE Receptor-type tyrosine-protein phosphatase U OS=Mus musculus OX=10090 GN=Ptpru PE=1 SV=1	162.39	2	1.6	12.5387	12.1334	12.1519	12.4877	12.1568	11.9763	11.9052	12.4787	12.255	12.6725	11.4905	11.993	11.864	12.3749	12.3439	12.0768		12.1193	11.7295	11.8522	12.2156	11.7976	11.8602	12.2589	12.1863	10.4906	10.0912	10.0983	10.4408	10.1054	9.92852	9.86257	10.439	10.2119	10.6338	9.46059	9.98565	9.82793	10.3263	10.3086	10.0584
Q5U4C3	Q5U4C3	Scaf1	Splicing factor, arginine/serine-rich 19	sp|Q5U4C3|SFR19_MOUSE Splicing factor, arginine/serine-rich 19 OS=Mus musculus OX=10090 GN=Scaf1 PE=1 SV=1	133.76	3	3.2	10.9781	10.6514	11.2988	11.7919	11.4439	11.5555	11.0927	11.4	11.5137	12.0235	10.4112	10.0846	10.8695	11.7191	11.6909		10.7183	10.5519	10.9427	10.7197	11.7009	11.4572	11.5872	11.4698	11.2024	9.50374	9.18298	9.81896	10.3188	9.96625	10.0815	9.62381	9.93395	10.0443	10.5586	8.95511	8.65106	9.40716	10.2442	10.2293		9.26366
Q9QY15	Q9QY15	Ddx25	ATP-dependent RNA helicase DDX25	sp|Q9QY15|DDX25_MOUSE ATP-dependent RNA helicase DDX25 OS=Mus musculus OX=10090 GN=Ddx25 PE=1 SV=2	54.84	2	3.9	11.578	12.1869	11.684	11.4318	11.5023	11.8342	11.5372	11.9421	11.946	11.7262	10.459	10.874	11.3338	11.5477	11.3853	11.3805	11.6725	11.0798	11.6311	10.1738		11.4478	11.6248	11.5477	11.5855	11.0705	11.6853	11.171	10.9255	10.9916	11.327	11.0351	11.4429	11.4435	11.228	9.96973	10.4073	10.8383	11.0396	10.8906	10.9027	11.1846
Q9JLJ1	Q9JLJ1	Selenok	Selenoprotein K	sp|Q9JLJ1|SELK_MOUSE Selenoprotein K OS=Mus musculus OX=10090 GN=Selenok PE=1 SV=3	10.64	2	21.3	13.0555	13.272	13.5205	13.8362	13.1802	13.4917	13.1877	13.3376	12.8362	13.4732	12.3207	12.5497	12.8865	13.2774	13.593	12.8526	12.9961		12.4036	12.6404	13.3069	13.1112	13.3144	13.25	13.1476	14.4224	14.6449	14.882	15.2044	14.5438	14.8589	14.5601	14.7129	14.2082	14.8495	13.7058	13.9574	14.2655	14.6438	14.9727	14.2492	14.3827
Q7TSK2	Q7TSK2	Sez6	Seizure protein 6	sp|Q7TSK2|SEZ6_MOUSE Seizure protein 6 OS=Mus musculus OX=10090 GN=Sez6 PE=1 SV=1	107.36	3	5.4	14.116	14.3358	14.3691	14.4353	14.1721	14.2441		14.8284	14.6445	14.6462	13.9268	14.0209	14.2154	14.4573	14.3943	14.0499	14.0921			13.8195	14.5879	14.734	14.712	14.4224	14.8594	12.9386	13.1643	13.1862	13.2592	12.9914	13.0671		13.6593	13.4722	13.4782	12.7677	12.8843	13.05	13.2794	13.2297	12.9023	12.9344
P17047	P17047	Lamp2	Lysosome-associated membrane glycoprotein 2	sp|P17047|LAMP2_MOUSE Lysosome-associated membrane glycoprotein 2 OS=Mus musculus OX=10090 GN=Lamp2 PE=1 SV=2	45.65	2	4.3	17.1617	17.0849	18.8618	17.2064	16.2112	17.2243	16.9839	16.8836	17.3946	17.2327	16.0096	15.6433	16.9453	17.3505	17.3456	17.0769	16.6932	16.8585	16.1349	16.3999	16.6904	16.9609	17.0607	14.6942	16.1002	16.7917	16.7207	18.4863	16.8376	15.8379	16.8546	16.6193	16.5219	17.0296	16.8721	15.6578	15.3141	16.5874	16.98	16.9883	16.7366	16.3429
E9QAP7	E9QAP7	Taf4	TATA-box binding protein associated factor 4	tr|E9QAP7|E9QAP7_MOUSE TATA-box binding protein associated factor 4 OS=Mus musculus OX=10090 GN=Taf4 PE=1 SV=1	105.24	6	6.2	13.9938	13.8717	14.2985	14.2859	14.3266	13.97	13.9804	14.3271	14.4782	14.4208	13.5356		14.4375	14.1558	14.4115	13.8284	14.0545	14.2194	14.1328	13.9809	14.1888	14.2173	14.4664	14.3561	14.3145	12.6603	12.5441	12.9596	12.9536	12.9898	12.6368	12.6523	13.002	13.1497	13.0967	12.2204		13.1161	12.8217	13.0908	12.5247	12.7407
Q9DBX1	Q9DBX1	Rgcc	Regulator of cell cycle RGCC	sp|Q9DBX1|RGCC_MOUSE Regulator of cell cycle RGCC OS=Mus musculus OX=10090 GN=Rgcc PE=1 SV=1	14.71	2	14.6	13.6473	13.325	14.3238	14.5302	13.837	13.4145	13.1688	13.9941	13.9266	14.4066		13.4108	14.1683	13.8035	13.8752	13.4857	13.5981	13.9143	12.8264	12.9072	13.7193	13.4243	14.1963	13.9247		15.2772	14.9609	15.9483	16.1614	15.4637	15.0448	14.8042	15.6324	15.5616	16.0459		15.0816	15.8103	15.433	15.518	15.1454	15.2478
Q9D1N9	Q9D1N9	Mrpl21	Large ribosomal subunit protein bL21m	sp|Q9D1N9|RM21_MOUSE Large ribosomal subunit protein bL21m OS=Mus musculus OX=10090 GN=Mrpl21 PE=1 SV=1	23.35	4	23	14.4864	14.5523	14.4741	14.2498	14.1887	14.4359	14.5845	14.8373	14.4314	14.5587	14.2985		14.304	14.5117	14.2157	14.6116	14.5468	14.5734	14.2938	13.8655	14.4611	14.5117	14.3292	14.3255	14.4999	14.7379	14.8096	14.7201	14.5025	14.4369	14.6876	14.8414	15.0971	14.6878	14.8195	14.5682		14.5675	14.7626	14.48	14.8928	14.818
Q8R418	Q8R418	Dicer1	Endoribonuclease Dicer	sp|Q8R418|DICER_MOUSE Endoribonuclease Dicer OS=Mus musculus OX=10090 GN=Dicer1 PE=1 SV=3	216.68	2	1.1	11.6926	11.8385	12.227	11.3762	12.6751	12.016	11.7807	11.9817	12.1338	11.7326	11.2532		11.6088	12.2695	11.7834	12.0572	12.5669		11.5868		12.4918		11.8252	11.8776	12.3375	8.90302	9.05481	9.43191	8.58786	9.88228	9.22672	8.99659	9.20049	9.3493	8.95244	8.48191		8.83129	9.47944	9.00659	9.29738	9.79697
Q9JIK5	Q9JIK5	Ddx21	Nucleolar RNA helicase 2	sp|Q9JIK5|DDX21_MOUSE Nucleolar RNA helicase 2 OS=Mus musculus OX=10090 GN=Ddx21 PE=1 SV=3	93.49	10	16.1	13.5615	13.9182	14.1742	14.1714	14.2672	13.8743	13.7441	13.8217	14.3812	14.2062	13.2386		13.7764	14.0026	14.3141	13.6251	13.8802	13.4093	14.2176	13.8587	14.0673	13.8014	14.4719	14.0249	13.5658	11.8987	12.2613	12.5059	12.5098	12.6011	12.2118	12.0867	12.1672	12.7234	12.5528	11.594		12.1257	12.3392	12.6641	11.992	12.2371
A0A087WRT4	A0A087WRT4	Fat1	FAT atypical cadherin 1	tr|A0A087WRT4|A0A087WRT4_MOUSE FAT atypical cadherin 1 OS=Mus musculus OX=10090 GN=Fat1 PE=1 SV=2	507.22	9	2.4	14.4305	14.7323	14.9631	14.8437	14.4358	14.7261	14.4123	14.8955	15.1259	14.9582		14.2877	14.7022	14.7682	14.8587	14.9028	14.5533	14.7408	14.5577	14.795	14.7317	14.9431	14.7393	15.0643	14.514	10.6889	10.9966	11.216	11.1033	10.6909	10.9848	10.6762	11.1623	11.3893	11.226		10.5869	10.9727	11.0261	11.1299	11.191	10.8314
Q91X51	Q91X51	Gorasp1	Golgi reassembly-stacking protein 1	sp|Q91X51|GORS1_MOUSE Golgi reassembly-stacking protein 1 OS=Mus musculus OX=10090 GN=Gorasp1 PE=1 SV=3	46.85	3	8.5	12.6304		13.0281	12.8634	12.865	12.6848	12.745	13.0105	13.5106	13.1147	12.7628		12.3461	13.2318	12.6481	12.3197	12.5398	12.8472	12.5737		12.7238	12.2665	13.1863	13.153	13.0323	13.5823		13.9745	13.8165	13.8136	13.637	13.7024	13.9707	14.4675	14.076	13.7329		13.3101	14.1832	13.6128	13.3013	13.5114
Q9ET43	Q9ET43	Cldn12	Claudin-12	sp|Q9ET43|CLD12_MOUSE Claudin-12 OS=Mus musculus OX=10090 GN=Cldn12 PE=1 SV=2	26.98	2	11.1	14.9646	15.068	14.8546	14.7035	14.4802	14.9789	14.6885	14.8601	14.9133	14.5341	13.9632	14.7966	14.6565	14.4054	14.3767	13.9516	14.6411	14.5004	13.5302	13.5414	14.9033	14.5847	14.516	14.2641	13.01	16.3316	16.4408	16.216	16.0716	15.8439	16.3461	16.061	16.2354	16.2853	15.9105	15.3483	16.2043	16.0355	15.7718	15.7564	15.3482	16.0277
Q03311	Q03311	Bche	Cholinesterase	sp|Q03311|CHLE_MOUSE Cholinesterase OS=Mus musculus OX=10090 GN=Bche PE=1 SV=2	68.42	2	4	13.8498	13.4471	13.6746	13.9878	14.048	13.1745	13.786	13.4011	14.1962	14.1302	13.2175		13.7176	13.6079	13.8601	13.6578	13.3624	13.5069	13.1813	13.6511	13.0704	12.4392	13.133	12.7917	12.2189	13.1012	12.7045	12.9206	13.2405	13.2962	12.4263	13.0429	12.6609	13.4527	13.391	12.4872		12.9811	12.8588	13.1244	12.939	12.6335
O88662	O88662	Emp2	Epithelial membrane protein 2	sp|O88662|EMP2_MOUSE Epithelial membrane protein 2 OS=Mus musculus OX=10090 GN=Emp2 PE=1 SV=1	19.73	2	5.2	11.2512	10.7373	11.2467	10.9679	10.8857	10.2806	10.5236	10.8062	11.2971	11.4169	10.1894		10.2928	10.8756	11.1028	10.8129	10.0066	10.5519		10.0524	10.9197	10.8814	11.6149	11.317	11.2328	14.2031	13.6951	14.1931	13.921	13.8343	13.2328	13.481	13.7664	14.2541	14.3782	13.1596		13.2567	13.827	14.0675	13.7945	12.9782
Q5SS00	Q5SS00	Zdbf2	DBF4-type zinc finger-containing protein 2 homolog	sp|Q5SS00|ZDBF2_MOUSE DBF4-type zinc finger-containing protein 2 homolog OS=Mus musculus OX=10090 GN=Zdbf2 PE=2 SV=1	273.58	3	1.6	14.2523	14.3204	14.7617	14.443	13.6329	14.1843	14.1908	14.0477	14.5126	14.3534	13.8634		14.2328	14.5434	14.3882	14.29	14.6324	13.8376	14.3794	13.5235	14.5692	14.2634	14.5875	14.5479	14.2777	11.7448	11.8187	12.2487	11.9367	11.1221	11.6771	11.6888	11.5485	12.0101	11.8553	11.3741		11.7374	12.0354	11.8935	11.8122	12.1446
Q8VCX6	Q8VCX6	Kptn	KICSTOR complex protein kaptin	sp|Q8VCX6|KPTN_MOUSE KICSTOR complex protein kaptin OS=Mus musculus OX=10090 GN=Kptn PE=2 SV=1	47.52	3	10.9	14.168	14.6033	14.4722	14.5656	14.2644	14.1795	14.2904	14.4012	14.3892	14.8162	12.6748	13.098	14.4717	14.4543	14.4235	14.2721	14.2308	14.5723	13.1966	13.1593	14.2658	13.7996	14.3914	14.4437	14.2474	14.3126	14.7537	14.6113	14.7114	14.4057	14.3244	14.4404	14.5541	14.5388	14.9701	12.8376	13.2833	14.6283	14.5983	14.5809	14.4464	14.395
Q91VY5	Q91VY5	Kdm4b	Lysine-specific demethylase 4B	sp|Q91VY5|KDM4B_MOUSE Lysine-specific demethylase 4B OS=Mus musculus OX=10090 GN=Kdm4b PE=2 SV=1	121.53	2	2.6	12.2019	12.6461	11.9648	12.3042	12.2057	12.0753	12.2952	10.9955	11.7835	12.0939	11.2984	11.1036	12.303	12.1131	11.572	12.042	11.9695	11.8705	10.3092	10.4175	11.5618	11.8347	11.9194	11.9332	11.9766	10.7614	11.2116	10.5189	10.865	10.762	10.6352	10.8603	9.5634	10.3481	10.6629	9.87626	9.70398	10.8747	10.6722	10.1444	10.6313	10.5487
Q80Y83	Q80Y83	Dixdc1	Dixin	sp|Q80Y83|DIXC1_MOUSE Dixin OS=Mus musculus OX=10090 GN=Dixdc1 PE=1 SV=1	80.17	4	5.6	11.6174	12.2616	11.5937	11.8407	11.8714	12.2348	12.1938	12.5731	12.6566	12.1851			11.909	12.1184	12.0453	12.2151	12.4028	12.2945	10.9877		12.3809	12.6227	11.9693	12.2049	12.3328	10.3213	10.9715	10.2922	10.5459	10.5721	10.9391	10.9033	11.2855	11.3656	10.8985			10.625	10.8218	10.7621	10.9488	11.1265
Q3U3R4	Q3U3R4	Lmf1	Lipase maturation factor 1	sp|Q3U3R4|LMF1_MOUSE Lipase maturation factor 1 OS=Mus musculus OX=10090 GN=Lmf1 PE=1 SV=1	65.84	3	6.8	14.0122	14.1617	14.2151	13.9439	13.9111	14.166	13.773	14.1097	14.4366	14.3327	13.275	13.2937	13.7081	13.7899	13.6514	13.789	13.594	13.8686	13.3097	13.2553	13.6453	13.8877	13.8659	13.8954	13.8022	13.5718	13.7272	13.7692	13.5047	13.4675	13.7259	13.3381	13.6776	14.0012	13.9017	12.8528	12.8941	13.2797	13.3489	13.2238	13.3784	13.1733
Q9DCR2	Q9DCR2	Ap3s1	AP-3 complex subunit sigma-1	sp|Q9DCR2|AP3S1_MOUSE AP-3 complex subunit sigma-1 OS=Mus musculus OX=10090 GN=Ap3s1 PE=1 SV=2	21.72	2	13	15.2434	15.6037	15.2582	14.9354	14.8595	15.4461	15.3241	15.3919	15.1963	14.9545	14.7183	15.0196	15.1455	14.5025	14.6926	14.9165	15.0802	14.8249	14.4864	13.3322	14.9798	15.2197	15.038	14.7873	14.1594	16.0254	16.3916	16.0346	15.7186	15.6383	16.2284	16.1115	16.1822	15.9833	15.7459	15.5185	15.8423	15.9395	15.2839	15.4874	15.7282	15.8818
E9Q784	E9Q784	Zc3h13	Zinc finger CCCH domain-containing protein 13	sp|E9Q784|ZC3HD_MOUSE Zinc finger CCCH domain-containing protein 13 OS=Mus musculus OX=10090 GN=Zc3h13 PE=1 SV=1	203.64	4	2.1	12.2908	12.3657	12.5441	12.8688	12.3616	12.0566	11.9788	12.4654	12.677	12.6519		11.3717	12.1686	12.6032	12.534	11.9362	11.6134	12.0192	12.3646	12.258	12.2259	12.408	12.7425	12.8266	12.3087	10.1983	10.2791	10.4462	10.7776	10.2659	9.9644	9.89176	10.3812	10.5896	10.5688		9.32001	10.0882	10.5102	10.4543	9.87346	9.54053
Q5XJE5	Q5XJE5	Leo1	RNA polymerase-associated protein LEO1	sp|Q5XJE5|LEO1_MOUSE RNA polymerase-associated protein LEO1 OS=Mus musculus OX=10090 GN=Leo1 PE=1 SV=2	75.55	2	3.9	13.0287	13.116	13.4998	12.9954	13.169	12.8161	13.4943	13.5352	13.6083	14.1048	12.0103	12.1525	12.8933	13.6508	13.7467	13.0716		13.0012	13.3861	13.4212	13.6743	13.4398	13.7795	13.5183	13.5174	11.7327	11.8259	12.1983	11.7006	11.8697	11.5204	12.2037	12.2475	12.3173	12.8182	10.7325	10.8973	11.6093	12.3543	12.4635	11.8053
Q91V16	Q91V16	Etfrf1	Electron transfer flavoprotein regulatory factor 1	sp|Q91V16|ETFR1_MOUSE Electron transfer flavoprotein regulatory factor 1 OS=Mus musculus OX=10090 GN=Etfrf1 PE=1 SV=1	10.38	2	19.8	12.7867	12.899	13.9351	13.3179	13.3624	12.8039	12.5856	13.0782	13.3057	13.5723		11.8793	13.0609	13.4971	13.6303	12.8493	12.7282	13.1845	12.9951	12.1795	12.9444	12.9569	13.4436	13.1117	12.8363	14.7386	14.8568	15.8815	15.271	15.311	14.7561	14.543	15.0384	15.2627	15.5336		13.872	15.0249	15.4485	15.595	14.8309	14.6998
Q9JII1	Q9JII1	Inpp5e	Phosphatidylinositol polyphosphate 5-phosphatase type IV	sp|Q9JII1|INP5E_MOUSE Phosphatidylinositol polyphosphate 5-phosphatase type IV OS=Mus musculus OX=10090 GN=Inpp5e PE=1 SV=1	71.87	3	7.1	12.0432	12.0133	12.1565		12.3452	11.892	12.0019	12.312	12.6714	12.5924	11.3065		12.0884	12.3244	12.0247	12.0935	11.5003	12.249	12.018			11.6233	12.0045	12.0509	12.2634	10.8252	10.8012	10.933		11.1239	10.6743	10.7894	11.1023	11.4584	11.3838	10.1067		10.8824	11.1058	10.8195	10.9052	10.3019
Q8CHI8	Q8CHI8	Ep400	E1A-binding protein p400	sp|Q8CHI8|EP400_MOUSE E1A-binding protein p400 OS=Mus musculus OX=10090 GN=Ep400 PE=1 SV=3	336.97	2	0.7		11.6262	12.3087	11.8871	11.3801	11.7355		11.7527	12.032	12.3446	10.508	11.3199	11.8113	12.1423	11.8051		11.3635		12.1925				12.3227	12.327			8.67713	9.3482	8.93329	8.42186	8.78079		8.80609	9.08202	9.39898	7.57121	8.40571	8.8684	9.18677	8.86294		8.42816
Q3TEA8	Q3TEA8	Hp1bp3	Heterochromatin protein 1-binding protein 3	sp|Q3TEA8|HP1B3_MOUSE Heterochromatin protein 1-binding protein 3 OS=Mus musculus OX=10090 GN=Hp1bp3 PE=1 SV=1	60.83	14	30.1	17.1275	17.3591	17.8375	17.9599	17.8986	17.5629	17.5238	17.6632	17.948	18.0664	16.6321	16.2524	17.4361	17.973	18.0532	16.7334	16.7974	16.6466	17.7968	17.267	18.27	17.7881	18.8326	18.2095	17.602	16.4356	16.6731	17.14	17.2691	17.2034	16.8712	16.8373	16.9796	17.2611	17.3839	15.9583	15.6013	16.7562	17.2805	17.374	16.0712	16.1251
Q9CXV1	Q9CXV1	Sdhd	Succinate dehydrogenase [ubiquinone] cytochrome b small subunit, mitochondrial	sp|Q9CXV1|DHSD_MOUSE Succinate dehydrogenase [ubiquinone] cytochrome b small subunit, mitochondrial OS=Mus musculus OX=10090 GN=Sdhd PE=1 SV=2	17	2	11.3	16.9611	17.0514	17.2427	16.9574	17.1676	16.7201	16.9349	17.602	17.3336	17.3148	15.881	15.9375	17.089	17.0219	16.9638	17.2516	16.7639	17.1915	16.0859	15.7407	17.0064	17.2719	17.1775	17.3438	17.6518	18.328	18.4243	18.6042	18.3256	18.5313	18.0873	18.3073	18.9773	18.7056	18.6911	17.2662	17.3452	18.468	18.3883	18.3435	18.6483	18.1505
D3Z3L3	D3Z3L3;Q99PQ1	Trim12c	Tripartite motif-containing protein 5	tr|D3Z3L3|D3Z3L3_MOUSE Tripartite motif-containing protein 5 OS=Mus musculus OX=10090 GN=Trim12c PE=1 SV=2	57.76	2	4.2	13.8307	13.7444	14.3532	13.7528	13.7725	13.8979	13.6189	13.6551	14.1288	13.9965	13.4939	13.7513	13.8957	10.5573	13.928	13.4831	13.6946	13.5374	13.4463	13.6101	13.0034	13.3087	13.1569	13.339	12.9671	12.9246	12.8442	13.4416	12.8479	12.8631	12.9922	12.7183	12.7574	13.2277	13.0998	12.606	12.886	13.0016	9.65076	13.0348	12.6068	12.8082
Q5S006	Q5S006	Lrrk2	Leucine-rich repeat serine/threonine-protein kinase 2	sp|Q5S006|LRRK2_MOUSE Leucine-rich repeat serine/threonine-protein kinase 2 OS=Mus musculus OX=10090 GN=Lrrk2 PE=1 SV=2	284.55	4	1.9		11.9299	11.9679	11.6688	12.3583	11.676	12.2284	12.1217	12.1013	12.1904			11.89	11.7426	11.5704	12.0781	11.9172	12.2212	11.4077	11.4482	11.8346	12.1064	11.8257	12.0431	11.3292		8.82158	8.84824	8.55585	9.24087	8.56216	9.11967	9.01587	8.99216	9.08563			8.78788	8.62793	8.46905	8.99364	8.82268
O70546	O70546	Kdm6a	Lysine-specific demethylase 6A	sp|O70546|KDM6A_MOUSE Lysine-specific demethylase 6A OS=Mus musculus OX=10090 GN=Kdm6a PE=1 SV=2	154.26	2	1.6		12.9537	13.0691				13.0296	12.9996	13.0732	13.5496	12.8162	12.8385	13.1867	12.7052		12.9018					12.945	13.1618					10.9342	11.0382				11.0097	10.9825	11.0529	11.5336	10.8091	10.8539	11.1733	10.6793		10.9061
Q8R2E9	Q8R2E9	Ero1b	ERO1-like protein beta	sp|Q8R2E9|ERO1B_MOUSE ERO1-like protein beta OS=Mus musculus OX=10090 GN=Ero1b PE=1 SV=1	53.48	2	4.3		11.4092		11.7631		11.2469	11.1232	12.1328	11.8819	11.9712						11.8556	11.6597	11.9052			12.1209	12.1638	12.1847	11.8371	12.1943		10.6666		11.0158		10.4986	10.3802	11.3926	11.1384	11.2321						11.1367	10.9308
Q640M1	Q640M1	Utp14a	U3 small nucleolar RNA-associated protein 14 homolog A	sp|Q640M1|UT14A_MOUSE U3 small nucleolar RNA-associated protein 14 homolog A OS=Mus musculus OX=10090 GN=Utp14a PE=1 SV=1	87.21	3	4.7	12.3853	12.5558	12.5493	12.8333	12.7144	12.6778	12.2712	12.5385	12.4951	12.9357	11.8006	11.6373	11.8845	12.6735	12.832	12.4905	12.3788		12.4208	12.33	12.6494	12.3372	12.6513	12.5972	12.2435	11.0518	11.2282	11.2103	11.501	11.3776	11.3446	10.9432	11.2133	11.1666	11.6116	10.4854	10.3446	10.563	11.3395	11.5113	11.1867	11.0649
Q8CIP5	Q8CIP5	Disp2	Protein dispatched homolog 2	sp|Q8CIP5|DISP2_MOUSE Protein dispatched homolog 2 OS=Mus musculus OX=10090 GN=Disp2 PE=1 SV=1	147.85	2	1.6	11.5158	11.6719	11.5883	12.0834	12.3515	10.8895		11.9482	11.8514	12.3295			11.2559	11.7226	11.6483	11.479	11.6186	11.6953	11.4215	11.6101	11.2274	11.5385	11.9775	11.6459	12.0131	9.73974	9.90177	9.80679	10.3086	10.5722	9.11379		10.1805	10.0804	10.5629			9.49196	9.94611	9.88511	9.73272	9.86225
Q8BRG8	Q8BRG8	Tmem209	Transmembrane protein 209	sp|Q8BRG8|TM209_MOUSE Transmembrane protein 209 OS=Mus musculus OX=10090 GN=Tmem209 PE=2 SV=1	62.94	3	8	13.4187	13.5806	13.9991	13.7142	16.0184	13.7298	13.5033	13.5725	13.8595	14.2398	13.2338	13.3552	13.16	14.9792	12.7887	13.7356	12.8682	13.7161	13.2925	13.2326	13.0769	14.0434	12.9601	13.6444	13.8817	12.5632	12.7311	13.1382	12.86	15.1597	12.8746	12.6534	12.7254	13.0091	13.3938	12.3966	12.5405	12.3166	14.1232	11.9461	12.9099	12.0324
Q78YY6	Q78YY6	Dnajc15	DnaJ homolog subfamily C member 15	sp|Q78YY6|DJC15_MOUSE DnaJ homolog subfamily C member 15 OS=Mus musculus OX=10090 GN=Dnajc15 PE=1 SV=1	15.94	2	13.4	14.6646	14.8662	14.8141	15.0992	15.0901	14.4804	14.5511	14.8179	14.9761	13.8525	14.5053	14.085	14.3298	14.4573	14.6003	13.321	13.5006	14.1401	14.4262	14.5733	13.9997	14.415	14.5805	14.7713	14.2382	15.157	15.3646	15.3011	15.5929	15.5793	14.9732	15.0491	15.3187	15.4736	14.3544	15.016	14.6183	14.8343	14.9492	15.1056	13.8432	14.0128
Q9ERI5	Q9ERI5	Jmjd6	Bifunctional arginine demethylase and lysyl-hydroxylase JMJD6	sp|Q9ERI5|JMJD6_MOUSE Bifunctional arginine demethylase and lysyl-hydroxylase JMJD6 OS=Mus musculus OX=10090 GN=Jmjd6 PE=1 SV=2	46.54	2	5.5	13.0032	13.398	13.3373	13.0488	12.906	12.2217	13.343	13.1417	12.9701	13.2119		13.1983		13.0202	13.3103	12.8369	12.9798	13.3537	13.0344	12.4542	12.8759	13.6716	13.3767	13.3149	13.3373	13.0482	13.449	13.3768	13.095	12.9477	12.267	13.3935	13.1951	13.0201	13.2663		13.2841		13.0647	13.3681	12.9116	13.0445
Q9CQZ5	Q9CQZ5	Ndufa6	NADH dehydrogenase [ubiquinone] 1 alpha subcomplex subunit 6	sp|Q9CQZ5|NDUA6_MOUSE NADH dehydrogenase [ubiquinone] 1 alpha subcomplex subunit 6 OS=Mus musculus OX=10090 GN=Ndufa6 PE=1 SV=1	15.27	2	17.6	12.789	13.0943	11.7286	10.5928	10.5223	12.6369	13.0784	12.1424	11.3237	11.3083	12.8774	12.5563	11.8479		10.4211	12.54	11.9531	11.2124	10.3452	10.4313	12.278	13.082	10.2243	10.6301	10.1314	13.7409	14.0522	12.675	11.5459	11.4709	13.5891	14.0358	13.1026	12.2806	12.2696	13.8475	13.549	12.8119		11.3858	13.5217	12.9247
Q9WTU0	Q9WTU0	Phf2	Lysine-specific demethylase PHF2	sp|Q9WTU0|PHF2_MOUSE Lysine-specific demethylase PHF2 OS=Mus musculus OX=10090 GN=Phf2 PE=1 SV=2	120.74	3	2.9	10.7997	11.7822	11.0344	11.3707	10.8899	10.8375		10.6287	11.4647	11.1416	10.5251		10.6353	11.098			10.4357	10.2127	11.2709	10.6707	10.6894	11.172	11.6065	11.7505	10.4703	9.19697	10.1855	9.42622	9.76925	9.284	9.23512		9.03432	9.86708	9.54834	8.94066		9.04471	9.49475			8.85266
Q8BW45	Q8BW45	Ube2q2l	RIKEN cDNA E330021D16 gene	tr|Q8BW45|Q8BW45_MOUSE RIKEN cDNA E330021D16 gene OS=Mus musculus OX=10090 GN=Ube2q2l PE=2 SV=1	42.21	2	8.6	12.7582	12.8706	12.7449	12.9406	12.5371		12.6625	12.9018	13.0129	11.9467	12.1376	12.5985	12.5178	12.1937	12.5089	13.1027	11.9734	12.8223			12.4305	11.9409	12.1475	12.3828	12.4027	12.8032	12.9215	12.7844	12.9868	12.5789		12.7129	12.9551	13.0629	12.0011	12.2008	12.6843	12.5749	12.2382	12.5667	13.1775	12.0381
Q8BPA8	Q8BPA8	Dpcd	Protein DPCD	sp|Q8BPA8|DPCD_MOUSE Protein DPCD OS=Mus musculus OX=10090 GN=Dpcd PE=1 SV=1	23.02	3	14.8	12.7178	13.3064	13.4594		12.9632	12.8913	13.0295	13.2004	13.376	13.3458	12.6426	12.9749	12.8594	13.3317	13.0334	12.8678	12.7526	12.8713			12.7296	12.6798	13.1346	13.335	13.2685	13.0847	13.6793	13.8209		13.3269	13.2585	13.402	13.5757	13.7479	13.7221	13.0278	13.3827	13.2384	13.6981	13.4131	13.2644	13.1392
Q62101	Q62101	Prkd1	Serine/threonine-protein kinase D1	sp|Q62101|KPCD1_MOUSE Serine/threonine-protein kinase D1 OS=Mus musculus OX=10090 GN=Prkd1 PE=1 SV=2	101.97	3	4.9	14.2565	14.3173	14.5921	14.6959	14.6068	14.3216	13.9617	14.3506	14.7643	14.5959	13.3559	13.6038	14.6484	14.2505	14.3691	14.0526	14.2478	14.467	13.136	13.1465	14.247	13.6914	14.3889	14.6773	14.304	13.1209	13.1877	13.451	13.5616	13.468	13.1863	12.8316	13.2234	13.6338	13.4698	12.2385	12.509	13.5248	13.1144	13.2464	12.9468	13.1319
Q923Z3	Q923Z3	Mto1	Protein MTO1 homolog, mitochondrial	sp|Q923Z3|MTO1_MOUSE Protein MTO1 homolog, mitochondrial OS=Mus musculus OX=10090 GN=Mto1 PE=2 SV=1	74.29	4	6.6	13.4962	13.5212	13.6453	13.6348	13.6989	13.5363	13.2599	13.7592	13.505	13.8391	13.2404	13.2784	13.3695	13.7781		13.5975	13.5812	13.466	13.4612	13.4677	13.3745	13.4525	13.7086	13.6494	13.9732	12.4037	12.4346	12.5474	12.5435	12.6032	12.4441	12.1729	12.675	12.4175	12.756	12.1661	12.2267	12.289	12.6851		12.5347	12.5084
Q9WTV7	Q9WTV7	Rlim	E3 ubiquitin-protein ligase RLIM	sp|Q9WTV7|RNF12_MOUSE E3 ubiquitin-protein ligase RLIM OS=Mus musculus OX=10090 GN=Rlim PE=1 SV=2	66.34	3	11	11.715	11.4599	11.6615	11.9614	11.7924	11.4125	11.4579	11.5743	11.9202	11.952	10.7237	11.1539	11.6827	11.9924	12.0221		11.0047	10.81	11.4093	11.4134	11.7328	11.5694	12.1128	11.6922	11.3701	10.809	10.5598	10.75	11.0565	10.8831	10.5067	10.5573	10.6766	11.0191	11.0554	9.83588	10.2886	10.7887	11.0858	11.1288		10.1183
Q8VEJ4	Q8VEJ4	Nle1	Notchless protein homolog 1	sp|Q8VEJ4|NLE1_MOUSE Notchless protein homolog 1 OS=Mus musculus OX=10090 GN=Nle1 PE=1 SV=4	53.1	4	10.7	11.9406	11.6757	11.765	12.2892	12.0734	11.7299	11.7177	11.8068	12.1646	12.2185	11.4576		11.6659	11.9832	12.4021	11.6211	11.5175	11.9956	11.8713	11.3408	11.2601	11.7194	11.9554	10.9144	11.7359	11.3075	11.0486	11.1264	11.6574	11.4371	11.0971	11.0902	11.1821	11.5366	11.5948	10.8428		11.0449	11.3497	11.7818	11.0178	10.9041
O89116	O89116	Vti1a	Vesicle transport through interaction with t-SNAREs homolog 1A	sp|O89116|VTI1A_MOUSE Vesicle transport through interaction with t-SNAREs homolog 1A OS=Mus musculus OX=10090 GN=Vti1a PE=1 SV=1	24.97	3	24.4	15.9638	16.0132	15.9435	15.9387	15.6657	15.8104	16.1069	16.233	16.1913	16.1775	15.0142	15.3737	15.8797	15.7427	15.9416	16.2964	15.7968	16.0744	14.0239	14.7483	16.0366	16.0999	16.0869	16.0175	16.0207	16.4563	16.5116	16.4305	16.4324	16.1549	16.3032	16.6048	16.7338	16.6888	16.6793	15.5249	15.907	16.3842	16.2347	16.4469	16.8186	16.3089
Q8R1N0	Q8R1N0	Znf830	Zinc finger protein 830	sp|Q8R1N0|ZN830_MOUSE Zinc finger protein 830 OS=Mus musculus OX=10090 GN=Znf830 PE=1 SV=1	40.63	2	10.2	12.8405	13.0372	13.2496	12.9363	12.9972	12.7518	12.8423	13.1659	13.2507	13.2507	12.7882	12.9452	12.9476	12.9314	12.9014	13.0283	12.9957	12.9984		12.6551	13.144	12.962	13.242	13.0944	13.2191	12.6224	12.8251	13.0261	12.7195	12.7759	12.5341	12.6298	12.9563	13.0377	13.042	12.5884	12.768	12.7417	12.7128	12.6962	12.84	12.7973
Q9CQ19	Q9CQ19	Myl9	Myosin regulatory light polypeptide 9	sp|Q9CQ19|MYL9_MOUSE Myosin regulatory light polypeptide 9 OS=Mus musculus OX=10090 GN=Myl9 PE=1 SV=3	19.84	4	41.3	14.9995	15.0765	16.5843	15.2121	15.2482	15.3389	15.1008	15.206	15.7524	15.1583	13.6628	13.8737	15.0412	15.7209	15.9294	14.8015	14.6544	14.825	15.2546	14.7988	15.7088	15.5407	15.4538	15.8988	15.4146	15.7815	15.8644	17.3608	15.9952	16.0269	16.1212	15.8883	15.9963	16.5394	15.9497	14.463	14.6964	15.8353	16.5023	16.7242	15.6132	15.4561
Q61469	Q61469	Plpp1	Phospholipid phosphatase 1	sp|Q61469|PLPP1_MOUSE Phospholipid phosphatase 1 OS=Mus musculus OX=10090 GN=Plpp1 PE=1 SV=1	31.87	2	5.7	13.2951	13.582	13.6971	13.0829	12.5772	13.4783	13.3745	13.6882	13.1505	13.0395	12.7133	12.3734	12.8902	12.7633	13.2824	13.1496	12.8976	12.9911	12.3196	12.4716	13.0076	12.985	12.7914	12.9459	12.2737	13.7876	14.0804	14.1841	13.5766	13.0664	13.971	13.8724	14.1891	13.648	13.5414	13.224	12.9066	13.3947	13.2552	13.7876	13.6718	13.4098
Q925J9	Q925J9	Med1	Mediator of RNA polymerase II transcription subunit 1	sp|Q925J9|MED1_MOUSE Mediator of RNA polymerase II transcription subunit 1 OS=Mus musculus OX=10090 GN=Med1 PE=1 SV=2	167.04	3	2.2	12.3937	13.0488	12.5763	12.4195	11.8462	12.7131	12.7657	12.5557	12.5474	12.9251	12.29	12.0336	12.4849	12.4041	12.3041	12.4102	12.1796	11.9963		11.8265	12.508	12.1125	12.5313	12.4963	12.3698	10.0788	10.7399	10.2559	10.1058	9.52805	10.3986	10.4563	10.2492	10.2375	10.6196	9.99336	9.75951	10.182	10.0887	10.002	10.1251	9.88438
P07091	P07091	S100a4	Protein S100-A4	sp|P07091|S10A4_MOUSE Protein S100-A4 OS=Mus musculus OX=10090 GN=S100a4 PE=1 SV=1	11.71	3	25.7	13.4676	13.945	13.7988	13.6033	13.6958	13.9349	13.5072	12.5193	14.1889	13.1682	12.5769	12.9553	13.5964	13.2774	13.5811	14.0565	13.32	13.4834	12.027	11.8579	10.2034	11.2694	11.2779	11.1361	11.7085	15.0976	15.5809	15.4233	15.2345	15.3225	15.5652	15.1426	14.1577	15.8239	14.8076	14.2251	14.626	15.2384	14.9068	15.2239	15.7161	14.9696
P35762	P35762	Cd81	CD81 antigen	sp|P35762|CD81_MOUSE CD81 antigen OS=Mus musculus OX=10090 GN=Cd81 PE=1 SV=2	25.8	3	18.6	20.073	20.3292	20.6735	20.3803	20.5763	20.2313	20.4186	20.4173	20.4303	20.6298	19.529	19.7374	20.1119	20.0703	20.1471	19.9867	20.2572	20.1433	19.7766	19.317	20.153	20.265	20.0095	20.0185	19.9042	21.0249	21.287	21.6199	21.3334	21.525	21.1835	21.376	21.3775	21.3872	21.591	20.4992	20.7301	21.0759	21.0217	21.1118	20.9683	21.2288
Q8BXA1	Q8BXA1	Golim4	Golgi integral membrane protein 4	sp|Q8BXA1|GOLI4_MOUSE Golgi integral membrane protein 4 OS=Mus musculus OX=10090 GN=Golim4 PE=1 SV=1	76.74	2	2.7	11.6823	10.641	11.6134	11.3654	11.3171		10.9706	11.8168		11.8323	11.097				11.5427			11.0161	11.5562	11.6203	11.8073	11.6775	11.4208			10.5899	9.55443	10.5154	10.2741	10.2214		9.88362	10.7327		10.7492	10.0227				10.463
Q8C1Q6	Q8C1Q6	Uqcc5	Ubiquinol-cytochrome c reductase complex assembly factor 5	sp|Q8C1Q6|UQCC5_MOUSE Ubiquinol-cytochrome c reductase complex assembly factor 5 OS=Mus musculus OX=10090 GN=Uqcc5 PE=1 SV=2	9.74	3	28.7	12.1999	12.064	12.7106	11.9723	11.7936	12.1028	11.9203	12.2409	12.2	12.1817	11.4252		11.8391	11.8148	12.1087	12.3143	11.8663	12.2153	11.809	11.3241	12.2386	12.0351	11.8221	12.2841	12.18	14.5669	14.4368	15.072	14.3405	14.1572	14.47	14.2927	14.6162	14.572	14.558	13.8104		14.2181	14.1813	14.4885	14.7109	14.2529
Q09143	Q09143	Slc7a1	High affinity cationic amino acid transporter 1	sp|Q09143|CTR1_MOUSE High affinity cationic amino acid transporter 1 OS=Mus musculus OX=10090 GN=Slc7a1 PE=1 SV=1	67.05	2	3.4	13.3383	13.5752	13.3122	13.2232	12.9583	13.2918	12.8162	12.8126	13.0735	13.1498	13.3636	13.4436	12.9914	13.0633		12.9555	13.4169	12.2378	13.0375	13.0808	13.2559	12.6966	12.9706	13.0275	13.1784	12.9683	13.2111	12.9367	12.8544	12.5851	12.9221	12.4517	12.451	12.7085	12.7892	13.0118	13.1144	12.6334	12.6928		12.6152	13.0665
Q80U70	Q80U70	Suz12	Polycomb protein Suz12	sp|Q80U70|SUZ12_MOUSE Polycomb protein Suz12 OS=Mus musculus OX=10090 GN=Suz12 PE=1 SV=2	82.97	2	3	12.9398	12.9564	12.8089	12.718	12.6781	12.9447	12.8023	12.5205	12.6561	12.8677	12.6073	11.9301	12.5811	12.2988	12.6964	12.3669	12.4562	12.3091	12.1929	11.3907	12.9885	12.6458	12.5867	12.2658		11.6823	11.7047	11.5459	11.4617	11.4173	11.6874	11.5502	11.2713	11.4035	11.6195	11.368	10.7133	11.3356	11.0408	11.4517	11.1391	11.2183
P16015	P16015	Ca3	Carbonic anhydrase 3	sp|P16015|CAH3_MOUSE Carbonic anhydrase 3 OS=Mus musculus OX=10090 GN=Ca3 PE=1 SV=3	29.35	2	8.1		12.4211	13.4069		12.4283	12.9395		12.0978	12.2644					12.87	12.4495				12.5946	12.0842	12.8357		12.6895	13.5847	12.8311		12.4721	13.4465		12.4701	12.9849		12.1512	12.3144					12.9145	12.5073
Q8VHK1	Q8VHK1	Caskin2	Caskin-2	sp|Q8VHK1|CSKI2_MOUSE Caskin-2 OS=Mus musculus OX=10090 GN=Caskin2 PE=1 SV=3	126.7	3	2.8	12.5618	12.8041	12.3367	12.8997	12.3538	12.7668	12.395	12.4622	13.0739				11.6462	12.8898	12.5419	11.9636	11.5094	12.5667	12.9485	11.6525	12.1669	12.4436	12.8122	12.9648	12.2251	10.9591	11.2073	10.7285	11.2982	10.7478	11.1644	10.7978	10.8678	11.4762				10.0555	11.2866	10.952	10.3906	9.92636
P51860	P51860	Nap1l2	Nucleosome assembly protein 1-like 2	sp|P51860|NP1L2_MOUSE Nucleosome assembly protein 1-like 2 OS=Mus musculus OX=10090 GN=Nap1l2 PE=1 SV=2	52.13	3	7.8	10.3862	10.1827	10.7282		11.1675			10.6504	10.8973	11.0078				10.3162	10.7055		10.301	10.6489					9.9778	10.0006	10.5638	9.87864	9.68113	10.2151		10.6567			10.1512	10.3948	10.5097				9.80812	10.2108		9.81311
P11930	P11930	Nudt19	Acyl-coenzyme A diphosphatase NUDT19	sp|P11930|NUD19_MOUSE Acyl-coenzyme A diphosphatase NUDT19 OS=Mus musculus OX=10090 GN=Nudt19 PE=1 SV=2	40.29	3	9.8	13.4188	13.6985	13.7841	14.1086	13.5385	13.2775	13.4163	13.6439	13.9068	13.9418	12.5218	12.6049	13.275	13.7169	13.6867	13.5533	13.0255	13.8949	12.6439	12.772	13.4053	13.3927	13.7346	13.9694	13.7814	13.3707	13.6563	13.7305	14.0617	13.4871	13.2297	13.3737	13.6042	13.8638	13.9031	12.492	12.5976	13.2389	13.6683	13.6514	13.535	12.9971
Q8CEI3	Q8CEI3	Ccdc28a	Coiled-coil domain containing 28A	tr|Q8CEI3|Q8CEI3_MOUSE Coiled-coil domain containing 28A OS=Mus musculus OX=10090 GN=Ccdc28a PE=1 SV=1	21.07	2	18.8	12.583	12.367	12.0051	12.2085	12.0325	12.1017	12.3591	12.2263	12.3059	12.2717	12.0215	11.7797	12.0767	11.5706	11.9741	11.9476	11.5703	11.4169	11.4074	11.6594	12.283	11.8702	12.2177	12.0287	10.7354	13.0754	12.8654	12.4921	12.7022	12.5217	12.5945	12.857	12.7272	12.8034	12.7736	12.5322	12.3129	12.5812	12.0625	12.4794	12.4698	12.0824
P02301	P02301;P84244	H3-5	Histone H3.3C	sp|P02301|H3C_MOUSE Histone H3.3C OS=Mus musculus OX=10090 GN=H3-5 PE=3 SV=3	15.31	4	36.8	13.7021	13.9303	14.0488	13.689	13.6685	12.9138	13.6142	13.5765	13.2951	13.2887	13.2008	14.0429	13.0979	13.5408	13.7104	12.3424	11.7398	12.1744	13.5557	13.3021	13.0388	13.1607	13.4788	13.7034	13.227	15.654	15.8881	15.9952	15.6421	15.6172	14.866	15.5716	15.5368	15.252	15.25	15.1709	16.0356	15.0618	15.4922	15.6751	14.324	13.7114
Q9JMG3	Q9JMG3	Tmub1	Transmembrane and ubiquitin-like domain-containing protein 1	sp|Q9JMG3|TMUB1_MOUSE Transmembrane and ubiquitin-like domain-containing protein 1 OS=Mus musculus OX=10090 GN=Tmub1 PE=1 SV=1	26.3	4	26.1	14.2817	14.2445	14.032	14.33	14.1902	14.2133	14.1751	14.472	14.5278	14.7467	12.9738	12.8014	14.0469	14.3478	14.4538	14.3462	14.514	14.2506	13.182	13.2782	14.6963	14.5171	14.5932	14.6396	14.2569	15.6486	15.6174	15.3934	15.6981	15.5539	15.5805	15.5476	15.8473	15.8998	16.123	14.359	14.2092	15.4259	15.7142	15.8335	15.7428	15.9006
Q9D7M8	Q9D7M8	Polr2d	DNA-directed RNA polymerase II subunit RPB4	sp|Q9D7M8|RPB4_MOUSE DNA-directed RNA polymerase II subunit RPB4 OS=Mus musculus OX=10090 GN=Polr2d PE=1 SV=2	16.3	2	31.7	12.5845	12.9116	12.8966	12.2861	13.1135	12.4427	12.411	12.3287	13.0206	12.7376	11.2743	11.3478	12.6657	12.5771	12.8549	12.8912	12.058	13.1328	11.4765	11.4557	12.4957	12.9898	12.3271	12.9783	12.943	13.3665	13.6995	13.6731	13.0693	13.8922	13.225	13.1985	13.119	13.8076	13.5289	12.0745	12.1706	13.4598	13.3586	13.6497	13.7028	12.8597
Q6ZWQ0	Q6ZWQ0	Syne2	Nesprin-2	sp|Q6ZWQ0|SYNE2_MOUSE Nesprin-2 OS=Mus musculus OX=10090 GN=Syne2 PE=1 SV=2	782.24	9	1.7	13.7316	13.3162	14.0451	13.5758	13.5311	13.5905	13.5015	13.6559	13.9147	14.0219	12.0563	12.9873	13.6323	13.7412	13.677	13.4904	13.4987	13.4187	13.0528	12.3598	13.3699	14.0311	13.9174	13.8727	13.3306	9.05046	8.64107	9.35853	8.8959	8.84676	8.90974	8.82587	8.98321	9.23861	9.35016	7.39343	8.34703	8.96321	9.05957	9.00869	8.83903	8.83732
Q9QWV9	Q9QWV9	Ccnt1	Cyclin-T1	sp|Q9QWV9|CCNT1_MOUSE Cyclin-T1 OS=Mus musculus OX=10090 GN=Ccnt1 PE=1 SV=3	80.55	2	2.6	11.1254	11.0869	10.786	11.1773	11.2257	10.9373	11.1122	11.4327	10.5538	11.6229	10.6541	10.2114	10.4877	10.5376	11.3744	10.8242		11.1693	10.3609	10.3894	10.9179	10.805	10.9894	11.0099	10.7799	10.3224	10.2898	9.97757	10.3755	10.4195	10.1346	10.3147	10.6381	9.75587	10.8293	9.86938	9.44918	9.6968	9.73415	10.5842	10.0509
Q7TPW1	Q7TPW1	Nexn	Nexilin	sp|Q7TPW1|NEXN_MOUSE Nexilin OS=Mus musculus OX=10090 GN=Nexn PE=1 SV=3	72.06	2	3.8			12.4664			11.6649		11.5856	11.4337	12.1042					11.9239			11.5492	11.9482	11.7905			11.6386					11.5059			10.7103		10.639	10.4838	11.1586					10.9817
P70288	P70288	Hdac2	Histone deacetylase 2	sp|P70288|HDAC2_MOUSE Histone deacetylase 2 OS=Mus musculus OX=10090 GN=Hdac2 PE=1 SV=1	55.27	5	10.7	14.3069	14.4274	14.327	14.6857	14.2045	14.3605	14.0958	14.3236	14.7553	14.1225	13.0342	12.9178	14.1425	14.2883	14.4176	14.4007	13.5014	14.3548	13.8436	13.7609	14.3206	14.5531	14.7073	14.7462	14.6202	13.9369	14.0633	13.9515	14.3168	13.8313	13.9908	13.7312	13.962	14.3903	13.7618	12.6824	12.5886	13.7845	13.9178	14.0604	14.0604	13.151
Q9D9V7	Q9D9V7	Dennd6b	Protein DENND6B	sp|Q9D9V7|DEN6B_MOUSE Protein DENND6B OS=Mus musculus OX=10090 GN=Dennd6b PE=2 SV=3	66.54	3	6	12.947	12.8268	11.9579	12.6635	12.9903	12.5975	12.8134	13.5672	12.9237	13.004	12.8738	11.5704	12.9359	12.5778	13.3382	12.8481	12.5062	12.5645		12.5765	12.5205	12.4034	11.8106	12.5176	12.67	12.0916	11.9773	11.0969	11.8093	12.1316	11.7423	11.9634	12.7201	12.0733	12.1579	12.0366	10.7557	12.0925	11.7218	12.4956	12.0223	11.6704
Q9DBY5	Q9DBY5	Cbx6	Chromobox protein homolog 6	sp|Q9DBY5|CBX6_MOUSE Chromobox protein homolog 6 OS=Mus musculus OX=10090 GN=Cbx6 PE=1 SV=2	44.43	2	8.5	11.1602	11.3402	10.8402	10.8658	10.7577	10.9254	10.8133	11.1719	10.8856	10.9876		10.9113	10.8061	10.6209	10.7685	10.9205	10.5582	10.4167			11.0915	10.4666	10.9447	10.4631	10.7098	10.8641	11.05	10.5387	10.571	10.4584	10.6296	10.5228	10.8842	10.5946	10.701		10.656	10.5221	10.3243	10.4853	10.6542	10.2819
Q566J8	Q566J8	Coq8b	Atypical kinase COQ8B, mitochondrial	sp|Q566J8|COQ8B_MOUSE Atypical kinase COQ8B, mitochondrial OS=Mus musculus OX=10090 GN=Coq8b PE=1 SV=1	59.19	2	4.5	12.0765	12.4258	13.0688	13.0736	12.8913	12.4362	12.2813	12.7991	12.8455	13.0116	12.1708	11.3656	12.4514	12.9016	12.749	12.3815	11.7029	12.6962	11.9295	11.6392	12.5806	12.3554	12.8683	12.9787	13.1725	11.0742	11.4294	12.061	12.0725	11.8858	11.4342	11.2845	11.8052	11.8482	12.0187	11.1867	10.4041	11.4612	11.8988	11.7595	11.409	10.7202
P97295	P97295	Npy2r	Neuropeptide Y receptor type 2	sp|P97295|NPY2R_MOUSE Neuropeptide Y receptor type 2 OS=Mus musculus OX=10090 GN=Npy2r PE=2 SV=2	42.6	2	7.1	11.4298	11.8917	11.2336	10.8494	11.3961	11.0811	11.5253	11.2259	12.0353	11.9204	11.4307	11.0636	11.5549		11.369	11.1283	10.1781	11.3417	10.9102	10.3312	10.7024	10.733	11.1513	10.9697	11.2435	11.7967	12.2646	11.595	11.2175	11.7598	11.4484	11.8977	11.6012	12.4073	12.2967	11.8159	11.4714	11.9338		11.7487	11.5249	10.5647
P59823	P59823	Il1rapl1	Interleukin-1 receptor accessory protein-like 1	sp|P59823|IRPL1_MOUSE Interleukin-1 receptor accessory protein-like 1 OS=Mus musculus OX=10090 GN=Il1rapl1 PE=1 SV=1	79.58	8	13.8	13.7619	13.6263	13.685	13.6386	13.6014	13.5158	13.7112	14.1908	13.9795	14.1852	12.3948	12.9187	13.6935	13.7733	13.8119	13.8261	13.5479	14.0171	12.2737	12.7275	13.9647	13.609	13.9617	13.9851	13.9338	12.5043	12.3747	12.4219	12.3822	12.3406	12.2586	12.4591	12.9416	12.727	12.9371	11.1555	11.7019	12.448	12.5152	12.5671	12.5983	12.31
Q3UGF1	Q3UGF1	Wdr19	WD repeat-containing protein 19	sp|Q3UGF1|WDR19_MOUSE WD repeat-containing protein 19 OS=Mus musculus OX=10090 GN=Wdr19 PE=1 SV=1	151.36	2	2	12.6118	12.8473	13.3236	12.6072	12.7839	12.4618	12.7024	12.5751	12.5085	13.557	12.1067	11.7943	12.6197	12.2096	12.4436	12.1181	12.7341	12.0015	12.928	12.1236	12.5316		12.3212	11.799	12.598	10.3349	10.5763	11.0411	10.3315	10.5038	10.1852	10.431	10.3066	10.2366	11.2895	9.84803	9.55812	10.3549	9.9322	10.1795	9.8709	10.4768
Q9CQL5	Q9CQL5	Mrpl18	Large ribosomal subunit protein uL18m	sp|Q9CQL5|RM18_MOUSE Large ribosomal subunit protein uL18m OS=Mus musculus OX=10090 GN=Mrpl18 PE=1 SV=1	20.66	4	20.6	15.5485	15.622	15.778	15.752	15.5387	15.3892	15.57	15.9921	15.8491	16.0024	14.2568	14.4369	15.6398	15.8363	15.8054	15.846	15.6649	15.7909	14.3492	14.5212	15.7189	15.8128	15.817	15.9905	15.9783	16.5004	16.5798	16.7244	16.7051	16.4874	16.3414	16.5274	16.9524	16.806	16.9637	15.2269	15.4296	16.6038	16.7877	16.7701	16.8276	16.6365
Q91WC9	Q91WC9	Daglb	Diacylglycerol lipase-beta	sp|Q91WC9|DGLB_MOUSE Diacylglycerol lipase-beta OS=Mus musculus OX=10090 GN=Daglb PE=1 SV=2	73.86	2	3.4	14.3458	14.6654	14.6472	14.4306	14.3211	14.4411	14.4942	14.7577	14.5182	14.666	13.5489	14.0174	14.4233	14.2315	14.0176	14.462	14.382	14.6363	13.6247	13.0489	14.2819	14.211	13.9973	14.2302	14.3122	13.4904	13.8158	13.7863	13.5764	13.4624	13.586	13.6442	13.9106	13.6678	13.8199	12.7116	13.2028	13.5799	13.3755	13.175	13.6363	13.5463
Q8BMC3	Q8BMC3	Shc2	SHC-transforming protein 2	sp|Q8BMC3|SHC2_MOUSE SHC-transforming protein 2 OS=Mus musculus OX=10090 GN=Shc2 PE=1 SV=3	61.73	3	6.1	13.3457	13.0275	12.9625	12.8903	13.2767	12.7718	12.7923	13.3761	13.2525	13.4791	12.4406	11.9933	13.011	12.9	13.341	12.6961	12.4732	13.1223	12.0684	12.2376	12.8411		12.9231	12.8083	12.8954	12.3907	12.0785	12.002	11.9366	12.3185	11.8171	11.8428	12.4295	12.3025	12.5335	11.5038	11.0791	12.0681	11.9445	12.3988	11.7708	11.5379
Q8BIV7	Q8BIV7	Slc45a1	Proton-associated sugar transporter A	sp|Q8BIV7|S45A1_MOUSE Proton-associated sugar transporter A OS=Mus musculus OX=10090 GN=Slc45a1 PE=1 SV=3	81.42	2	2.9	14.6329	14.2951	14.1582	14.3505	14.6923	14.2765	14.088	14.5452	14.5022	14.5794	14.4054		14.0067	14.4624	14.4349	14.5245	14.3814	14.34	14.431	14.1326	14.2737	14.2167	14.378		14.2668	14.0612	13.7294	13.581	13.78	14.1174	13.7051	13.5218	13.9819	13.9356	14.0172	13.8519		13.4471	13.8903	13.8761	13.9826	13.8294
Q8R2N2	Q8R2N2	Utp4	U3 small nucleolar RNA-associated protein 4 homolog	sp|Q8R2N2|UTP4_MOUSE U3 small nucleolar RNA-associated protein 4 homolog OS=Mus musculus OX=10090 GN=Utp4 PE=2 SV=3	76.86	2	6.7	13.3154	13.5073	12.948		12.6533	12.6585	13.1049	13.1817	12.6011		12.9326	12.3222	12.7251	12.8469	12.7375			12.5275	10.5275	12.7736			12.7901	12.1989	12.8695	12.2673	12.4651	11.8944		11.6019	11.6107	12.0623	12.142	11.5581		11.9027	11.3149	11.6891	11.7983	11.7022
Q9CPV2	Q9CPV2	Anapc16	Anaphase-promoting complex subunit 16	sp|Q9CPV2|APC16_MOUSE Anaphase-promoting complex subunit 16 OS=Mus musculus OX=10090 GN=Anapc16 PE=3 SV=1	11.66	3	53.6	13.2273	14.3988	14.273	13.1929	12.6928	12.5745	12.4867	12.8205	12.955	13.0711	14.7869	10.7626	12.7741	12.5924	12.6042	13.4858	12.3969	10.9433	13.5172	12.9625	12.8193	10.3598	12.8942	12.9728	14.3366	14.5943	15.7716	15.6345	14.5611	14.0565	13.9417	13.8591	14.1958	14.327	14.4474	16.1721	12.1703	14.1531	13.9589	13.9839	14.8825	13.7835
Q9CZA6	Q9CZA6	Nde1	Nuclear distribution protein nudE homolog 1	sp|Q9CZA6|NDE1_MOUSE Nuclear distribution protein nudE homolog 1 OS=Mus musculus OX=10090 GN=Nde1 PE=1 SV=1	38.5	3	11	13.6235	13.952	13.7993	14.009	13.6894	13.88	13.3827	13.7316	14.2008	13.9883		13.2675	13.7924	13.9882	14.1507	13.8005	13.8514	13.6564	13.7325	13.7621	13.6627	13.3606	13.9421	13.7774	13.6044	12.9316	13.266	13.1018	13.3183	12.9942	13.1884	12.6962	13.048	13.5139	13.3058		12.6163	13.1125	13.2957	13.4716	13.1383	13.1792
Q5NCR9	Q5NCR9	Nsrp1	Nuclear speckle splicing regulatory protein 1	sp|Q5NCR9|NSRP1_MOUSE Nuclear speckle splicing regulatory protein 1 OS=Mus musculus OX=10090 GN=Nsrp1 PE=1 SV=1	63.76	3	6.3		10.6897	10.4055	10.4287	10.2671	10.518	10.1078	10.0332		10.6112		10.1327	10.4528	10.5324	10.3005	10.0001		10.4599	9.96745	10.1587	9.99477	10.4183	10.4728	10.3006	10.2162		10.2552	9.9596	9.98945	9.82342	10.0779	9.67282	9.60118		10.1801		9.73308	10.0244	10.0915	9.87291	9.58945
Q80TE0	Q80TE0	Rpap1	RNA polymerase II-associated protein 1	sp|Q80TE0|RPAP1_MOUSE RNA polymerase II-associated protein 1 OS=Mus musculus OX=10090 GN=Rpap1 PE=1 SV=2	155.17	4	3.9	10.9854	11.5909	11.3843	11.6954	11.5048	11.4126	11.5926	11.5059	11.7681	12.0778	10.7828	10.513	11.2884	11.6929	11.5101		11.923	11.5334	11.2039	10.8248		11.3927	11.5515	11.5874	11.5896	8.80802	9.41949	9.20141	9.51925	9.32421	9.2355	9.42073	9.33691	9.5957	9.90979	8.6236	8.37637	9.12308	9.51499	9.34548		9.76533
Q60695	Q60695	Rgl1	Ral guanine nucleotide dissociation stimulator-like 1	sp|Q60695|RGL1_MOUSE Ral guanine nucleotide dissociation stimulator-like 1 OS=Mus musculus OX=10090 GN=Rgl1 PE=1 SV=2	86.27	2	2.5	12.1064	12.584	12.9121	12.4175	12.8703	12.5466	12.1653	11.8856	12.7718	12.9679	11.3758	11.2304	12.7165	12.4713	12.7999	11.5487	12.388	12.3096	11.5891	11.967	12.234	11.063	11.457	10.9616	12.6528	11.0139	11.4974	11.8141	11.3262	11.7745	11.4544	11.0782	10.8015	11.6843	11.8848	10.3016	10.1787	11.636	11.3783	11.7202	10.486	11.3151
E9Q9Q6	E9Q9Q6	Cdh18	Cadherin 18	tr|E9Q9Q6|E9Q9Q6_MOUSE Cadherin 18 OS=Mus musculus OX=10090 GN=Cdh18 PE=1 SV=1	87.88	4	5.9	12.4211	12.1234	12.0399	12.4447	12.4744	12.3719	11.9062	12.8415	12.4835	13.1103	11.4733	11.8081	12.2599	12.4386	12.4155	11.8839	11.0242	12.1313	11.6828	12.2963	12.9411	12.5502	12.4134	12.6095	12.0782	11.203	10.9113	10.8164	11.2279	11.2532	11.1541	10.6936	11.6319	11.2705	11.9017	10.2735	10.6309	11.054	11.2201	11.2102	10.6956	9.82585
Q80X41	Q80X41	Vrk1	Serine/threonine-protein kinase VRK1	sp|Q80X41|VRK1_MOUSE Serine/threonine-protein kinase VRK1 OS=Mus musculus OX=10090 GN=Vrk1 PE=1 SV=2	49.71	4	7.3	13.6399	14.0305	14.3644	14.2959	14.19	13.9646	14.1542	14.114	14.4763	14.4916	12.981	12.9741	13.947	14.096	14.3719	14.1154	13.9026	14.0654	13.4227	13.0574	14.1385	14.1783	14.3708	14.3052	14.2176	13.1324	13.5289	13.8514	13.7895	13.6792	13.4574	13.6522	13.6149	13.9737	13.9935	12.4917	12.5074	13.4515	13.588	13.8772	13.6376	13.4148
O35188	O35188	Cx3cl1	Fractalkine	sp|O35188|X3CL1_MOUSE Fractalkine OS=Mus musculus OX=10090 GN=Cx3cl1 PE=1 SV=3	42.07	2	4.8	13.0314	13.0905	12.9249	12.9305	12.5264	13.175	13.3615	13.2209	13.1621	13.1234	10.9746	12.2476	12.8323	13.2345	12.8766	13.403	12.9051	13.3205	12.1545	11.819	13.6728	13.7751	13.4176	13.7206	13.4809	12.8958	12.9609	12.7839	12.7962	12.3876	13.0398	13.2314	13.0936	13.0316	12.9973	10.8573	12.1528	12.7088	13.0984	12.7539	13.2972	12.7892
Q5SUC9	Q5SUC9	Sco1	Protein SCO1 homolog, mitochondrial	sp|Q5SUC9|SCO1_MOUSE Protein SCO1 homolog, mitochondrial OS=Mus musculus OX=10090 GN=Sco1 PE=1 SV=1	31.6	2	7	14.4744	14.4842	15.1335	14.9664	15.4749	15.2958	15.2413	14.7254	14.5242	15.2951	13.9803	14.4655	14.4349	14.6989	14.9843	13.7586	14.8226	14.8252	14.6659	14.2013	14.4017	14.4061	14.677	14.8228	15.0814	14.7258	14.7416	15.3795	15.2191	15.7231	15.5476	15.4983	14.9852	14.7807	15.5559	14.25	14.7578	14.6984	14.9499	15.2486	14.0398	15.0937
P16390	P16390	Kcna3	Potassium voltage-gated channel subfamily A member 3	sp|P16390|KCNA3_MOUSE Potassium voltage-gated channel subfamily A member 3 OS=Mus musculus OX=10090 GN=Kcna3 PE=1 SV=3	58.53	2	3.8	14.6333	14.8176	14.8067	15.1457	14.7608	14.908	14.7443	15.0511	14.9377	15.1068	14.3015	13.9938	14.4651	14.7523	14.987	14.5636	14.3157	14.7393	13.8594	14.1595	14.5074	14.4274	14.735	14.6318	14.5121	14.4152	14.6055	14.5832	14.9289	14.5395	14.6903	14.5318	14.8415	14.7247	14.8981	14.1017	13.8166	14.2592	14.5338	14.7818	14.3753	14.1174
Q3UW53	Q3UW53	Niban1	Protein Niban 1	sp|Q3UW53|NIBA1_MOUSE Protein Niban 1 OS=Mus musculus OX=10090 GN=Niban1 PE=1 SV=2	102.58	3	4.8	13.6966	13.3534	13.8384	13.5217	13.6388	13.3048	12.6839	13.3319	13.8183	13.1298	12.3119		13.2233	13.3288	13.5799	13.3364	12.7548	13.1015	13.4562	12.9547		12.5594	12.6045	13.2374		12.2909	11.9536	12.4273	12.1172	12.2299	11.8995	11.2837	11.9346	12.4177	11.7336	10.9245		11.8297	11.9226	12.187	11.9604	11.3689
Q8BXA7	Q8BXA7	Phlpp2	PH domain leucine-rich repeat-containing protein phosphatase 2	sp|Q8BXA7|PHLP2_MOUSE PH domain leucine-rich repeat-containing protein phosphatase 2 OS=Mus musculus OX=10090 GN=Phlpp2 PE=1 SV=3	145.85	2	2	11.9155	12.3586	12.2303	12.1805	12.0158	12.0974	11.9113	12.2849	12.0897	12.3012	11.8927	11.9657	12.0301	11.5385		12.2048		12.2231	12.2001	11.8226	12.2034	11.7283	11.7916		12.2551	10.1394	10.5885	10.4488	10.4057	10.2366	10.3217	10.1407	10.5173	10.3187	10.5345	10.1349	10.2304	10.2661	9.76198		10.4585
P63242	P63242	Eif5a	Eukaryotic translation initiation factor 5A-1	sp|P63242|IF5A1_MOUSE Eukaryotic translation initiation factor 5A-1 OS=Mus musculus OX=10090 GN=Eif5a PE=1 SV=2	16.82	4	23.4	19.3471	19.2233	19.5086	19.4408	19.4107	19.1176	18.9674	19.2863	19.5805	19.679	18.2715	18.5137	19.1819	19.1653	19.4804	19.3757	18.694	19.4207	18.3911	18.3001	19.0939	19.2289	19.264	19.3292	19.3405	20.299	20.1811	20.455	20.3939	20.3593	20.0698	19.9248	20.2466	20.5374	20.6403	19.2416	19.5064	20.1459	20.1167	20.4451	20.3573	19.6656
Q0VE29	Q0VE29	Samd12	Sterile alpha motif domain-containing protein 12	sp|Q0VE29|SAM12_MOUSE Sterile alpha motif domain-containing protein 12 OS=Mus musculus OX=10090 GN=Samd12 PE=2 SV=1	18.23	2	16.1		11.7385	11.8021		11.4252	11.8162	11.7464	11.7883	12.2799	12.14	11.3547		11.9967	11.8264			11.8285	11.8281			12.031	11.2603	11.9965	11.6418	11.764		12.3744	12.4266		12.052	12.4465	12.3818	12.4266	12.9149	12.7794	12.0029		12.6388	12.4559			12.4782
Q9CQ43	Q9CQ43	Dut	Deoxyuridine 5'-triphosphate nucleotidohydrolase	sp|Q9CQ43|DUT_MOUSE Deoxyuridine 5'-triphosphate nucleotidohydrolase OS=Mus musculus OX=10090 GN=Dut PE=1 SV=1	17.37	4	29	13.5735	13.8914	13.9061	13.7876	13.6733	13.5894	13.7494	13.8808	13.862	13.8015	12.6819	12.6899	13.6621	13.7687	13.7796	13.8247	13.74	13.7491	12.5116	12.5666	13.9294	14.0152	14.0352	14.0171	13.9739	14.2034	14.5273	14.5306	14.4188	14.3	14.2197	14.3848	14.5192	14.497	14.4408	13.3301	13.3607	14.3041	14.3981	14.4224	14.4844	14.3897
A2A8U2	A2A8U2	Tmem201	Transmembrane protein 201	sp|A2A8U2|TM201_MOUSE Transmembrane protein 201 OS=Mus musculus OX=10090 GN=Tmem201 PE=1 SV=1	72.45	3	6.8	11.4841	12.2541	12.1549	11.7088	11.7152	11.7535	11.4166	11.9241	12.1384	11.9683	11.2501	11.404	11.5884	12.0282	12.0865	11.5695	11.7092	11.7571	11.8086			12.0272	12.2693	12.0278	12.1417	11.0437	11.8196	11.709	11.2696	11.2716	11.3134	10.9817	11.492	11.703	11.5373	10.828	11.0044	11.16	11.5873	11.6589	11.1588	11.2884
P10107	P10107	Anxa1	Annexin A1	sp|P10107|ANXA1_MOUSE Annexin A1 OS=Mus musculus OX=10090 GN=Anxa1 PE=1 SV=2	38.71	5	16.8	11.308	10.98	12.9257		11.6179	12.3559	11.75	11.7642	12.1005			11.341	11.5146	12.1039	12.3766				12.0815	11.7622	11.565		12.1834	12.0386		10.8005	10.4784	12.4127		11.1071	11.8487	11.2479	11.265	11.598			10.8742	11.0191	11.5958	11.8819
P62858	P62858	Rps28	Small ribosomal subunit protein eS28	sp|P62858|RS28_MOUSE Small ribosomal subunit protein eS28 OS=Mus musculus OX=10090 GN=Rps28 PE=1 SV=1	7.84	4	50.7	20.5557	20.4901	20.5271	21.0192	20.2479	20.2617	20.383	20.9101	20.8197	20.7315	19.2354	19.6218	20.2203	20.8112	20.6648	20.1329	20.0634	20.6965	19.9224	19.8665	20.2614	20.0988	20.5482	20.6031	20.8887	22.9226	22.8629	22.8886	23.3874	22.6116	22.629	22.7554	23.2854	23.1917	23.1079	21.6206	22.0295	22.5993	23.1776	23.0445	22.5295	22.45
Q9CXI3	Q9CXI3	Moxd1	DBH-like monooxygenase protein 1	sp|Q9CXI3|MOXD1_MOUSE DBH-like monooxygenase protein 1 OS=Mus musculus OX=10090 GN=Moxd1 PE=1 SV=1	69.63	2	3.1	13.3581	13.4214	13.9447	13.5802	13.8678	13.5403	13.1254	13.8952	13.394	14.237	13.0542		13.3576	14.2006	13.7557	13.0687	13.3651	13.6981	13.9107	13.8115	14.1964	13.8625	14.2206	13.9504		12.4031	12.4723	12.9842	12.6264	12.9096	12.5856	12.1759	12.9486	12.4441	13.2914	12.1174		12.4147	13.2451	12.8135	12.1434	12.4297
Q60611	Q60611	Satb1	DNA-binding protein SATB1	sp|Q60611|SATB1_MOUSE DNA-binding protein SATB1 OS=Mus musculus OX=10090 GN=Satb1 PE=1 SV=2	85.83	3	4.8	13.0883	12.3772		13.0816	13.3394	12.6764		14.0554	13.0685	13.7771		12.5406	12.6892	13.496	12.7805	12.9076		13.2599	12.7698	12.7978	13.5188	13.2733	12.7622	13.4267	13.0557	11.9527	11.2476		11.9473	12.2006	11.5412		12.9282	11.9379	12.651		11.4458	11.5657	12.3599	11.6577	11.8018
P09541	P09541	Myl4	Myosin light chain 4	sp|P09541|MYL4_MOUSE Myosin light chain 4 OS=Mus musculus OX=10090 GN=Myl4 PE=1 SV=3	21.15	2	15.5		13.4886		13.1583	13.2316	13.247	13.218	13.3698		12.7577				13.2368	13.1549	13.2318	12.9825		13.079	12.8439	13.4238	13.2797	13.5895	13.7253	13.4373		13.746		13.411	13.4798	13.4988	13.4749	13.6296		13.0186				13.4878	13.4191	13.5129	13.2536
E9Q9B3	E9Q9B3	Spryd3	SPRY domain containing 3	tr|E9Q9B3|E9Q9B3_MOUSE SPRY domain containing 3 OS=Mus musculus OX=10090 GN=Spryd3 PE=1 SV=1	49.67	3	6.8	14.0732	14.3883	14.6955	14.6418	14.307	14.3895	14.2139	14.1684	14.7024	14.8961	13.7521	13.7823	14.376	14.2074	14.5918	14.2787	13.4369	14.0864	13.267	14.013	14.027	13.8625	14.4262	14.3503	14.1149	13.8551	14.1762	14.472	14.425	14.0857	14.1718	14.0013	13.9588	14.4894	14.6875	13.5523	13.6051	14.1701	13.9889	14.3866	14.0904	13.2386
Q9DBT3	Q9DBT3	Ccdc97	Coiled-coil domain-containing protein 97	sp|Q9DBT3|CCD97_MOUSE Coiled-coil domain-containing protein 97 OS=Mus musculus OX=10090 GN=Ccdc97 PE=1 SV=1	38.7	3	13.2	13.3904	13.5626	13.4457	13.5114	13.2544	13.312	12.9648	13.3893	13.3337	13.6251	13.0574	13.0872	13.296	13.4085	13.6108	13.1868	13.0778	13.3629		13.1483	13.4571	13.1773	13.4367	13.2196	13.3083	13.4354	13.6135	13.4853	13.5576	13.2962	13.3574	13.0153	13.4427	13.3837	13.6795	13.1207	13.173	13.353	13.453	13.6686	13.2615	13.1425
Q8CFG0	Q8CFG0	Sulf2	Extracellular sulfatase Sulf-2	sp|Q8CFG0|SULF2_MOUSE Extracellular sulfatase Sulf-2 OS=Mus musculus OX=10090 GN=Sulf2 PE=1 SV=2	100.43	2	2.1	11.6227	11.9465	12.2934	12.028	11.6707	11.7367	11.9597	11.7574	11.7075	11.9979	11.6732	11.5109	11.2683	11.2312	12.5007	12.0207	10.7756	11.5431	12.1665		11.9864	11.7969	11.8272	12.0713	11.0252	10.5303	10.8599	11.1954	10.9367	10.5749	10.6445	10.8726	10.6732	10.62	10.9148	10.5989	10.4592	10.1878	10.1382	11.421	10.9579	9.70275
Q8BGF0	Q8BGF0	AW551984	Expressed sequence AW551984	tr|Q8BGF0|Q8BGF0_MOUSE Expressed sequence AW551984 OS=Mus musculus OX=10090 GN=AW551984 PE=1 SV=1	89.41	3	4.6	14.0532	14.2786	14.2411	14.2983	14.1065	14.1827	13.8696	14.1256	14.2186	14.4053	13.8473		13.92	14.2601	14.3788	13.9033	14.3014	14.1241	13.9884	14.1202	14.2598	14.2692	14.3711		14.2306	12.6128	12.8441	12.7952	12.8591	12.6628	12.7426	12.4347	12.6935	12.7832	12.9743	12.4252		12.4916	12.8191	12.9512	12.4926	12.8807
Q8R3G1	Q8R3G1	Ppp1r8	Nuclear inhibitor of protein phosphatase 1	sp|Q8R3G1|PP1R8_MOUSE Nuclear inhibitor of protein phosphatase 1 OS=Mus musculus OX=10090 GN=Ppp1r8 PE=1 SV=1	38.5	4	21.1	14.8027	15.103	15.0016	15.0935	14.7585	14.7701	14.8225	15.0912	15.1096	15.2632	14.1447	13.5131	14.6996	14.9648	15.0785	15.1177	14.8124	14.9733	14.1417	13.7421	15.2976	15.1822	15.2568	15.2758	15.2331	14.9472	15.2534	15.1407	15.2392	14.8998	14.915	14.9726	15.2441	15.2592	15.4172	14.3075	13.6985	14.8562	15.1088	15.2358	15.292	14.9766
Q8VDV7	Q8VDV7	Tbc1d19	TBC1 domain family, member 19	tr|Q8VDV7|Q8VDV7_MOUSE TBC1 domain family, member 19 OS=Mus musculus OX=10090 GN=Tbc1d19 PE=1 SV=1	60.37	2	4.4	14.1626	14.2366	14.0965	14.1241	14.1483	13.8277	13.9839	14.3456	14.4099	14.6004	13.3776	13.3771	14.0538	14.2076	14.0786	13.9299	13.9222	13.2824	13.6118	13.4768	13.8571	13.8475	14.04	14.1307	14.048	13.655	13.735	13.5835	13.6177	13.6375	13.3205	13.4819	13.8464	13.9073	14.1023	12.8883	12.9104	13.5584	13.6995	13.5838	13.4521	13.4344
Q8CB77	Q8CB77	Eloa	Elongin-A	sp|Q8CB77|ELOA1_MOUSE Elongin-A OS=Mus musculus OX=10090 GN=Eloa PE=1 SV=3	87.11	2	2.8	11.2584	11.5982	11.327	10.9124	11.2784	11.1348	10.8967	11.5153	11.8261	11.5548	10.8107	10.8433	10.8196	11.6858	10.738			11.4015	10.8612	11.4573	11.4207	11.4106	11.9769	11.5879	10.5644	10.0009	10.3466	10.0639	9.65607	10.0176	9.87751	9.64461	10.2661	10.5736	10.3067	9.57141	9.6265	9.57407	10.4278	9.49326
Q3UMG5	Q3UMG5	Lrch2	Leucine-rich repeat and calponin homology domain-containing protein 2	sp|Q3UMG5|LRCH2_MOUSE Leucine-rich repeat and calponin homology domain-containing protein 2 OS=Mus musculus OX=10090 GN=Lrch2 PE=2 SV=2	84.94	4	6.7	12.4674	13.0961	12.904	12.8469	12.9418	12.5625	12.5635	12.3994	13.3206	13.011	11.9914	12.4789	12.4156	12.6962	12.9126	12.5157	12.713	12.8705	12.6459		12.9628	12.9019	12.9283	12.9644	12.9491	11.2099	11.8445	11.6409	11.5906	11.681	11.3053	11.3114	11.1502	12.0681	11.7628	10.752	11.2622	11.1701	11.4381	11.6679	11.2879	11.4752
O88492	O88492	Plin4	Perilipin-4	sp|O88492|PLIN4_MOUSE Perilipin-4 OS=Mus musculus OX=10090 GN=Plin4 PE=1 SV=2	139.33	10	7.9	12.9882	13.5738	14.1186	13.9678	13.593	14.1941	13.0985	12.9512	14.4225	13.5142	12.528	12.3488	13.2145	14.7627	14.7285	12.8778	12.7056	12.4123	13.3333	12.9362	12.0864	11.7592	11.7733	12.5572	11.3521	10.2962	10.8878	11.4212	11.2771	10.8978	11.5025	10.412	10.2676	11.7356	10.8316	9.85423	9.69766	10.5346	12.0703	12.0493	10.2156	10.0333
Q60847	Q60847	Col12a1	Collagen alpha-1(XII) chain	sp|Q60847|COCA1_MOUSE Collagen alpha-1(XII) chain OS=Mus musculus OX=10090 GN=Col12a1 PE=2 SV=3	340	5	1.9	11.8074		14.7421	12.272		13.3578		12.4484	13.4297	11.9398		11.2389		14.195	14.0888		12.0153		13.5981	12.8508	13.5297	13.4091	13.0737	13.7521	12.8804	8.5499		11.479	9.01565		10.1006		9.19923	10.1772	8.69165		8.02212		10.9369	10.8441		8.77742
P39749	P39749	Fen1	Flap endonuclease 1	sp|P39749|FEN1_MOUSE Flap endonuclease 1 OS=Mus musculus OX=10090 GN=Fen1 PE=1 SV=1	42.29	2	6.3	11.269	11.3096	11.4671	11.0772	11.1295	11.0496	11.3243	11.191	11.7724	11.6756	10.7501	10.0921	11.0219	11.4144	11.7717	10.7153	11.156	10.1296	10.8249	10.8177	10.5996	10.181		10.8859		10.973	11.0195	11.1656	10.7823	10.8303	10.7539	11.0338	10.9033	11.4814	11.389	10.4723	9.83686	10.7379	11.1179	11.4884	10.449	10.8797
Q3UGP8	Q3UGP8	Alg10b	Putative Dol-P-Glc:Glc(2)Man(9)GlcNAc(2)-PP-Dol alpha-1,2-glucosyltransferase	sp|Q3UGP8|AG10B_MOUSE Putative Dol-P-Glc:Glc(2)Man(9)GlcNAc(2)-PP-Dol alpha-1,2-glucosyltransferase OS=Mus musculus OX=10090 GN=Alg10b PE=1 SV=1	55.43	2	5.9	14.2875	14.3667	14.509	14.5729	14.4401	14.2304	14.146	14.6517	14.5037	14.9194	13.6989	13.908	14.2385	14.3403	14.5765	14.1433	13.7288	14.2743	13.769	13.3815	14.1515	13.9187	14.4008	14.3328	14.5009	13.9175	14.0026	14.1334	14.2041	14.0669	13.8607	13.7815	14.2901	14.1387	14.5588	13.3471	13.5787	13.8805	13.9698	14.2192	13.803	13.3785
P97865	P97865	Pex7	Peroxisomal targeting signal 2 receptor	sp|P97865|PEX7_MOUSE Peroxisomal targeting signal 2 receptor OS=Mus musculus OX=10090 GN=Pex7 PE=1 SV=1	35.48	3	11.6	12.7851	12.7807	12.8414	12.8022	12.6092	12.7411	12.5131	12.6962	13.1539	12.9751	12.4109	12.2463	12.48	12.2223	12.0767	12.1966	12.6846	12.7956	12.1675	12.0636	12.3885	12.103	12.4639	12.2728	12.507	13.2776	13.2791	13.3284	13.2958	13.0984	13.2339	13.0111	13.197	13.6514	13.477	12.9216	12.7795	12.9845	12.7142	12.582	12.7187	13.1967
Q8BYW1	Q8BYW1	Arhgap25	Rho GTPase-activating protein 25	sp|Q8BYW1|RHG25_MOUSE Rho GTPase-activating protein 25 OS=Mus musculus OX=10090 GN=Arhgap25 PE=1 SV=2	73.34	6	9.4	12.6114	12.5301	12.1909	12.543	12.6269	12.7732	12.3627	13.0894	12.791	13.1828	12.1738	12.2023	12.7073	12.9647	12.9229	12.4957	12.4149	12.8565		12.4104	12.8438	12.4037	12.3988	12.6651	12.6019	11.2057	11.1304	10.7798	11.1385	11.218	11.3679	10.9625	11.6921	11.3904	11.7866	10.7863	10.8374	11.3137	11.5585	11.53	11.1198	11.0289
Q8BG26	Q8BG26	Rusc1	AP-4 complex accessory subunit RUSC1	sp|Q8BG26|RUSC1_MOUSE AP-4 complex accessory subunit RUSC1 OS=Mus musculus OX=10090 GN=Rusc1 PE=1 SV=2	95.14	3	4	14.3325	14.5265	14.3519	14.7215	14.575	14.0684	14.3898	14.5636	14.677	14.9332	14.4499	14.2902	14.6141	14.6204	14.6785	14.4468		14.413	14.4973	14.3977	14.4003	14.5159	14.6268	14.4717	14.6516	13.075	13.2748	13.0889	13.4652	13.3142	12.8111	13.1377	13.3144	13.4245	13.6851	13.2106	13.0734	13.3686	13.3623	13.4337	13.2189
O70551	O70551	Srpk1	SRSF protein kinase 1	sp|O70551|SRPK1_MOUSE SRSF protein kinase 1 OS=Mus musculus OX=10090 GN=Srpk1 PE=1 SV=2	73.04	4	7.4	14.2697	14.0837	14.2286	14.1846	14.2602	14.152	14.0637	14.3297	14.3889	14.6768	13.0291	13.6207	14.1145	14.1528	14.1622	13.7794	13.8804	14.363	13.5624	13.4308	14.1684	14.0802	14.2493	14.2318	14.4125	13.3147	13.1346	13.2681	13.2309	13.3019	13.1974	13.1142	13.3831	13.4389	13.7313	12.0923	12.7065	13.1716	13.1973	13.22	12.8541	12.945
P45377	P45377	Akr1b8	Aldose reductase-related protein 2	sp|P45377|ALD2_MOUSE Aldose reductase-related protein 2 OS=Mus musculus OX=10090 GN=Akr1b8 PE=1 SV=2	36.1	4	27.5	12.6839	12.3933	12.9971			12.9138		12.6114	12.4014	12.5802			12.6218	12.5646	12.7406		13.0443					12.4572	12.3202	12.6909		12.4659	12.1812	12.7736			12.6961		12.4018	12.1884	12.3716			12.4159	12.3461	12.5354		12.846
P55194	P55194	Sh3bp1	SH3 domain-binding protein 1	sp|P55194|3BP1_MOUSE SH3 domain-binding protein 1 OS=Mus musculus OX=10090 GN=Sh3bp1 PE=1 SV=3	74.13	7	11	13.8422	14.1024	14.0122	14.4327	14.0623	14.0061	13.7418	14.1367	14.3478	14.2626	12.8658	12.6362	13.9319	14.1115	14.154	13.8242	13.913	13.9863	13.7176	13.2689	13.6973	13.8921	14.2822	13.8864	13.8283	12.6242	12.8903	12.7887	13.2159	12.841	12.7884	12.5293	12.927	13.1348	13.054	11.666	11.4589	12.7259	12.893	12.9488	12.6359	12.7147
Q9QUG2	Q9QUG2	Polk	DNA polymerase kappa	sp|Q9QUG2|POLK_MOUSE DNA polymerase kappa OS=Mus musculus OX=10090 GN=Polk PE=1 SV=1	95.94	2	5	13.6721	13.5617			14.9404	13.7774	13.7099	14.1568	14.1143	14.61	13.0918	13.7247	13.3547	13.761		13.6691	13.7863		13.1028	13.1881	13.836	13.7559	13.9235	13.5689	14.0628	12.1978	12.0932			13.4628	12.3033	12.241	12.6908	12.645	13.1451	11.6356	12.2911	11.8924	12.2862		12.2244	12.3316
Q60960	Q60960	Kpna1	Importin subunit alpha-5	sp|Q60960|IMA5_MOUSE Importin subunit alpha-5 OS=Mus musculus OX=10090 GN=Kpna1 PE=1 SV=2	60.14	2	3	15.4587	15.7204	15.4975	15.4142	15.7175	15.5878	15.4063	15.6325	15.6318	15.8885	14.767	14.7685	15.647	15.1244	15.6707	15.3744	15.5338	14.9656	14.7893	14.8329	15.5535	15.4357	15.4222	15.4482	15.7234	15.1627	15.4303	15.196	15.1193	15.4182	15.2921	15.1157	15.3448	15.3408	15.6018	14.4892	14.5133	15.363	14.8279	15.3874	15.1081	15.2574
E9PUR0	E9PUR0	Ankhd1	Ankyrin repeat and KH domain containing 1	tr|E9PUR0|E9PUR0_MOUSE Ankyrin repeat and KH domain containing 1 OS=Mus musculus OX=10090 GN=Ankhd1 PE=1 SV=1	269.51	5	1.8	12.8471	12.9003	12.4409	12.6709	12.2713	12.6646	11.8756	12.7788	12.6246	12.7171	11.8844	12.2554	11.8979	12.1702	12.3077	12.2759	12.4442	12.6973	11.992	11.3867	11.8818	12.4396	12.3859	12.2966	11.8578	10.4591	10.5182	10.0475	10.2841	9.8801	10.277	9.49311	10.3992	10.2417	10.3385	9.51465	9.90827	9.522	9.78172	9.93259	9.91768	10.076
P49117	P49117	Nr2c2	Nuclear receptor subfamily 2 group C member 2	sp|P49117|NR2C2_MOUSE Nuclear receptor subfamily 2 group C member 2 OS=Mus musculus OX=10090 GN=Nr2c2 PE=1 SV=1	65.2	4	8.1	14.1836	14.1314	14.3465	14.3814	14.4608	14.4203	14.1032	14.3058	14.53	14.4802	13.4856	13.6761	14.0896	14.2411	14.0556	13.9236	14.0439	14.215	13.6966	13.4387	14.1924	14.2519	14.157	14.1252	14.094	13.1355	13.0892	13.293	13.3345	13.4094	13.3725	13.0606	13.2661	13.4869	13.4415	12.4558	12.6688	13.0535	13.1925	13.0203	12.9052	13.0155
Q9CQG1	Q9CQG1	Chac2	Putative glutathione-specific gamma-glutamylcyclotransferase 2	sp|Q9CQG1|CHAC2_MOUSE Putative glutathione-specific gamma-glutamylcyclotransferase 2 OS=Mus musculus OX=10090 GN=Chac2 PE=1 SV=1	20.14	5	30.3	12.913	13.0133	13.2566	13.3641	13.2365	13.1087	12.8144	13.4347	13.5527	13.4851	12.9046	12.9989	13.2858	13.3738	13.7311	12.94		12.4899	13.1226	13.0756	12.9176	13.0639	13.4156	13.2667	13.4317	13.8649	13.9712	14.203	14.3172	14.1852	14.0609	13.7718	14.395	14.5097	14.4464	13.8748	13.9916	14.2498	14.3252	14.6958	13.9216
P15388	P15388	Kcnc1	Potassium voltage-gated channel subfamily C member 1	sp|P15388|KCNC1_MOUSE Potassium voltage-gated channel subfamily C member 1 OS=Mus musculus OX=10090 GN=Kcnc1 PE=1 SV=1	57.89	3	7.2	15.179	15.2564	15.2056	15.6964	15.1116	15.0122	15.2344	15.7051	15.6244	15.6001	14.5214	14.408	15.2637	15.3107	15.2409	15.394	15.1768	15.7078	13.7454	14.4178	15.3028	15.4243	15.5291	15.6037	15.8124	14.883	14.9663	14.904	15.4016	14.8123	14.7165	14.9438	15.4174	15.3334	15.3135	14.2436	14.1528	14.9797	15.0142	14.9577	15.1276	14.9004
Q99J56	Q99J56	Derl1	Derlin-1	sp|Q99J56|DERL1_MOUSE Derlin-1 OS=Mus musculus OX=10090 GN=Derl1 PE=1 SV=1	28.82	2	7.6	16.6369	16.7294	16.8553	16.6985	16.3183	16.5425	16.475	16.7278	16.7886	16.6793	15.8851	15.2208	16.4856	16.3667	16.5911	16.5611	16.3349	16.6286	16.2057	15.7487	16.4526	16.5232	16.601	16.5121	16.5294	17.1293	17.2278	17.3423	17.1922	16.8076	17.0353	16.973	17.2286	17.2861	17.1811	16.3958	15.754	16.9901	16.8586	17.0963	17.0833	16.847
Q3V0J1	Q3V0J1	Tmem237	Transmembrane protein 237	sp|Q3V0J1|TM237_MOUSE Transmembrane protein 237 OS=Mus musculus OX=10090 GN=Tmem237 PE=1 SV=1	47.31	2	4.9	12.6655	12.8671	13.0535	12.6263	12.9097	12.7573	12.9365	12.8427	12.9495	13.0405	12.6053	12.5227		12.791	13.11	12.6963	12.9049	12.3756	12.6985	12.6951	12.7147		12.7974	12.8485	13.0184	12.7105	12.918	13.0931	12.6725	12.9514	12.8026	12.987	12.8961	12.9996	13.0949	12.6685	12.6085		12.8355	13.1678	12.7711	12.9696
Q8R367	Q8R367	Rerg	Ras-related and estrogen-regulated growth inhibitor	sp|Q8R367|RERG_MOUSE Ras-related and estrogen-regulated growth inhibitor OS=Mus musculus OX=10090 GN=Rerg PE=2 SV=1	22.57	2	10.1	13.5698	13.8473	13.6711	13.5023	13.586	13.5498	13.3363	13.5898	13.6935	13.7039	13.0738		13.6414	13.2282	13.7605	13.398	13.7235	13.5148	13.4196	13.0918	13.2657	12.9763	13.844	13.3715	13.6455	14.1998	14.4832	14.2956	14.1335	14.2127	14.1801	13.9718	14.2281	14.3285	14.3433	13.722		14.2835	13.8576	14.4032	14.0577	14.3731
Q99K30	Q99K30	Eps8l2	Epidermal growth factor receptor kinase substrate 8-like protein 2	sp|Q99K30|ES8L2_MOUSE Epidermal growth factor receptor kinase substrate 8-like protein 2 OS=Mus musculus OX=10090 GN=Eps8l2 PE=1 SV=1	82.18	3	4.8	14.0644	13.3695	14.9174	14.0111	14.5757		13.9519	14.4087	14.55			11.8791	13.9065	14.3864	14.5017	13.5592	13.6167	13.3847	14.8134		14.4607	14.7487	14.3769	14.6627	14.7724	12.887	12.1981	13.7346	12.8349	13.3951		12.78	13.2397	13.3776			10.7425	12.7412	13.2085	13.3371	12.4115	12.459
Q02788	Q02788	Col6a2	Collagen alpha-2(VI) chain	sp|Q02788|CO6A2_MOUSE Collagen alpha-2(VI) chain OS=Mus musculus OX=10090 GN=Col6a2 PE=1 SV=3	110.27	4	3.7	12.1642	12.5368	14.5421	12.8015	12.0517	13.4222	12.3588	12.1589	13.3727	12.2431	11.7207	11.3923	12.6765	14.4963	14.0746	11.896		12.0451	13.851	12.2407	13.3393	12.4177	12.3009	13.5594	12.867	10.5014	10.8799	12.8739	11.1399	10.3857	11.7597	10.7014	10.5044	11.7149	10.5897	10.0761	9.77032	11.0257	12.833	12.4246	10.2629
P56379	P56379	Atp5mpl	ATP synthase subunit ATP5MPL, mitochondrial	sp|P56379|ATP68_MOUSE ATP synthase subunit ATP5MPL, mitochondrial OS=Mus musculus OX=10090 GN=Atp5mpl PE=1 SV=1	6.69	2	29.3	12.8281	12.6951	13.2092	13.1625	13.2733	13.3129	12.5823	12.9084	13.2956	13.3234	11.9758	12.3773	12.5594	13.0475	13.4186	12.3805	12.5155	12.6115	12.7454	12.5829	12.5813	12.45	12.7624	13.0184	12.8393	15.1951	15.0679	15.5707	15.5306	15.637	15.6802	14.9547	15.2837	15.6676	15.6997	14.361	14.785	14.9384	15.414	15.7983	14.7772	14.9021
Q9D8Y7	Q9D8Y7	Tnfaip8l2	Tumor necrosis factor alpha-induced protein 8-like protein 2	sp|Q9D8Y7|TP8L2_MOUSE Tumor necrosis factor alpha-induced protein 8-like protein 2 OS=Mus musculus OX=10090 GN=Tnfaip8l2 PE=1 SV=1	20.6	3	22.8	12.349	12.1271	12.0552	12.0756	11.6649		11.7906	11.7871	12.5914	12.3048		11.5464	11.8623	11.4329	12.1167	12.0201		11.8945	12.0725	12.0308	11.3627		11.0165			13.4935	13.2775	13.1942	13.2213	12.8061		12.9407	12.94	13.741	13.4588		12.7318	13.0189	12.5769	13.2741	13.1944
P62077	P62077	Timm8b	Mitochondrial import inner membrane translocase subunit Tim8 B	sp|P62077|TIM8B_MOUSE Mitochondrial import inner membrane translocase subunit Tim8 B OS=Mus musculus OX=10090 GN=Timm8b PE=1 SV=1	9.28	2	22.9	17.7418	17.6809	17.9317	17.9186	17.9222	17.6473	17.5538	18.0606	18.0343	18.2839	16.9571	17.059	17.8102	17.7171	17.8184	17.7281	17.6714	17.8259	16.8241	16.9918	17.5684	17.5739	17.6886	17.7375	17.9937	19.1087	19.0538	19.2932	19.2868	19.2859	19.0146	18.9262	19.4359	19.4063	19.6602	18.3422	18.4668	19.1892	19.0835	19.1981	19.1248	19.058
O88572	O88572	Lrp6	Low-density lipoprotein receptor-related protein 6	sp|O88572|LRP6_MOUSE Low-density lipoprotein receptor-related protein 6 OS=Mus musculus OX=10090 GN=Lrp6 PE=1 SV=1	180.14	2	1.6		11.2273	11.6245	10.5711	10.8429	11.0034	10.6347	11.1759	11.3497	11.1174	10.3645	10.5577	10.9166		10.245	10.6942	10.3972	10.6803	10.4663	10.9258	10.8269	10.8425	11.4471	10.8654	11.2392		8.97569	9.36149	8.31471	8.58208	8.74619	8.38263	8.9267	9.09718	8.86928	8.1252	8.34092	8.67115		8.00027	8.46639	8.15928
Q8VDG5	Q8VDG5	Ppcs	Phosphopantothenate--cysteine ligase	sp|Q8VDG5|PPCS_MOUSE Phosphopantothenate--cysteine ligase OS=Mus musculus OX=10090 GN=Ppcs PE=1 SV=1	33.77	4	11.6	15.2829	15.3663	15.6912	15.4547	15.6337	15.1206	15.132	15.4299	15.7211		15.0028	15.0372	15.4171	15.5497			15.3665	15.5078	15.5271	15.4157	15.0963	15.2267	15.4962		15.4804	15.1474	15.2367	15.5502	15.3204	15.4949	14.9853	15.0019	15.3027	15.5906		14.8855	14.9424	15.2936	15.4136			15.2507
O08811	O08811	Ercc2	General transcription and DNA repair factor IIH helicase subunit XPD	sp|O08811|ERCC2_MOUSE General transcription and DNA repair factor IIH helicase subunit XPD OS=Mus musculus OX=10090 GN=Ercc2 PE=1 SV=2	86.79	4	5.1	12.4516	12.4392	12.7433	12.5136	12.4591	12.3388	12.7488	12.5748	12.2931	12.6628	12.2986	12.0041	11.9974	11.8151	12.3259	12.3971	12.2364	12.3932	11.5047	11.9059	12.5064	12.3954	12.3544	12.4039	12.6107	11.1181	11.1116	11.4043	11.1813	11.1223	11.0056	11.4208	11.2496	10.9646	11.3387	10.9833	10.7114	10.6759	10.4811	11.0052	11.0933	10.9226
Q6NZF1	Q6NZF1	Zc3h11a	Zinc finger CCCH domain-containing protein 11A	sp|Q6NZF1|ZC11A_MOUSE Zinc finger CCCH domain-containing protein 11A OS=Mus musculus OX=10090 GN=Zc3h11a PE=1 SV=1	86.44	7	12.2	12.2485	12.3232	12.4825	12.4874	12.1278	12.3222	12.223	12.5344	12.5856	12.7023	11.7937	11.0025	12.2593	12.4063	12.4282	12.1143	12.2494	11.7418	12.017	11.6809	12.5116	12.412	12.6644	12.6825	12.4475	10.741	10.8216	10.9695	10.9811	10.6171	10.815	10.7209	11.0352	11.0831	11.2042	10.3044	9.53579	10.7638	10.8983	10.9334	10.6365	10.7616
Q3UWE6	Q3UWE6	Wdr20	WD repeat domain 20	tr|Q3UWE6|Q3UWE6_MOUSE WD repeat domain 20 OS=Mus musculus OX=10090 GN=Wdr20 PE=1 SV=1	62.85	5	12.8	13.4554	13.7044	13.4935	13.8621	13.4376	13.5336	13.6807	13.8788	13.8582	13.8595	13.03	12.2078	13.5373	13.2445	13.7549	13.7357	13.6165	13.8528	12.6727	12.7698	13.7925	13.946	13.8491	13.8929	13.8901	12.9479	13.2028	12.9805	13.3558	12.9268	13.0264	13.1786	13.3797	13.3557	13.3613	12.5407	11.741	13.0418	12.7365	13.2602	13.2579	13.1287
A2A863	A2A863	Itgb4	Integrin beta-4	sp|A2A863|ITB4_MOUSE Integrin beta-4 OS=Mus musculus OX=10090 GN=Itgb4 PE=1 SV=1	201.52	3	2.7	13.2974	12.162	13.3631	12.5222		12.0749		11.4545	12.2824	11.9668	11.0172		12.7358	12.8433	12.4271		12.3539		12.6474	12.1361	11.4027		12.4432		9.99181	10.6054	9.47598	10.6657	9.83143		9.38324		8.7709	9.59543	9.28428	8.34344		10.0558	10.1508	9.7479		9.68165
P48455	P48455	Ppp3cc	Serine/threonine-protein phosphatase 2B catalytic subunit gamma isoform	sp|P48455|PP2BC_MOUSE Serine/threonine-protein phosphatase 2B catalytic subunit gamma isoform OS=Mus musculus OX=10090 GN=Ppp3cc PE=1 SV=1	58.66	4	10.9	15.0563	15.2556	15.2087	15.1985	15.2954	15.3003	15.4056	15.4141	15.3375	15.6229	14.6735	14.5961	14.8102	14.9656	15.2247	15.0631	14.8611	15.2351	14.5903	14.739	15.0995	15.0133	14.3808	15.0931	15.1574	14.3643	14.5696	14.5112	14.5078	14.6002	14.6086	14.7191	14.7305	14.6506	14.9403	13.9998	13.945	14.1303	14.2732	14.5455	14.4009	14.1888
Q99N85	Q99N85	Mrps18a	Large ribosomal subunit protein mL66	sp|Q99N85|RT18A_MOUSE Large ribosomal subunit protein mL66 OS=Mus musculus OX=10090 GN=Mrps18a PE=2 SV=1	22.31	2	16.8	14.2474	13.9524	13.4798	14.1161	13.8702	13.9249	13.6982	14.1167	13.9423	14.2894	13.2639	14.0943	14.109	13.962	13.9987	12.5393	13.7964		13.8203	13.8529	13.6048	13.6198	12.9093	13.7964	13.6309	14.8774	14.5883	14.1043	14.7473	14.4969	14.5552	14.3337	14.7551	14.5773	14.9288	13.9121	14.7651	14.751	14.5914	14.6415	13.199	14.446
Q61609	Q61609	Slc20a1	Sodium-dependent phosphate transporter 1	sp|Q61609|S20A1_MOUSE Sodium-dependent phosphate transporter 1 OS=Mus musculus OX=10090 GN=Slc20a1 PE=1 SV=1	74.11	3	4.7	13.5221	13.4186	13.7448	13.5882	13.4312	13.5719	13.3332	13.9833	13.5654	13.8788	12.9388	12.5748	13.5156	13.5808	13.5257	13.42	13.3137	13.6258	12.8469	12.363	13.5692	13.7645	13.6999	13.6665	13.4109	13.0146	12.9169	13.2318	13.0819	12.9204	13.0647	12.8311	13.4842	13.0629	13.3807	12.4495	12.1081	13.0202	13.0728	13.0309	12.9422	12.8259
Q91ZH7	Q91ZH7	Abhd3	Phospholipase ABHD3	sp|Q91ZH7|ABHD3_MOUSE Phospholipase ABHD3 OS=Mus musculus OX=10090 GN=Abhd3 PE=1 SV=1	46.2	2	4.4	15.3566	15.4444	15.5468	15.4333	15.2074	15.3276	15.1134	15.4854		15.7339	14.8059		15.2888	15.2021	15.1805	15.092	15.0054	15.267	14.9524	14.7766	14.9504	14.7173	15.0688	14.9758		15.1386	15.2323	15.3233	15.2165	14.9861	15.1099	14.9008	15.2757		15.5253	14.6061		15.0828	14.9836	14.9752	14.9037	14.8071
O35242	O35242	Nsmaf	Protein FAN	sp|O35242|FAN_MOUSE Protein FAN OS=Mus musculus OX=10090 GN=Nsmaf PE=1 SV=2	104.48	3	6.7	18.0956	18.2868	18.0879	17.8048		17.6792		17.7928		18.03	16.8172		17.8276	18.3742	17.4173			17.7836	16.6233	16.5548		17.8874	16.3871	17.4333	17.4866	16.8776	17.0747	16.8644	16.5879		16.4615		16.5831		16.8214	15.6174		16.6216	17.1557	16.2121
A3KGV1	A3KGV1	Odf2	Outer dense fiber protein 2	sp|A3KGV1|ODFP2_MOUSE Outer dense fiber protein 2 OS=Mus musculus OX=10090 GN=Odf2 PE=1 SV=1	95.48	5	6.1	12.4457	12.6014	13.4089	12.6351		12.4093			12.8592	12.6182	11.9624	11.9083	12.243	12.9012	12.7721		12.4389		12.5179	11.5057	13.0196	13.0164	13.2323	12.8578	12.5532	11.0053	11.1669	11.963	11.1959		10.9692			11.4238	11.1871	10.5402	10.5087	10.8147	11.4603	11.3445		11.0182
Q60771	Q60771	Cldn11	Claudin-11	sp|Q60771|CLD11_MOUSE Claudin-11 OS=Mus musculus OX=10090 GN=Cldn11 PE=1 SV=1	22.1	3	18.8	15.489	15.7709	15.8547	16.3075	15.8722	15.7834	15.6212	15.2735	16.3445	15.1581	15.0834	14.3508	15.1674	16.2192	15.7226	15.6485	15.5518	15.1482	15.1793	15.0763	15.4542	15.4119	15.5315	15.9659	15.2954	16.6335	16.9214	16.9938	17.4532	17.0135	16.9282	16.7712	16.4264	17.494	16.3121	16.2461	15.5361	16.3239	17.3632	16.88	16.8227	16.716
Q3UDP0	Q3UDP0	Wdr41	WD repeat-containing protein 41	sp|Q3UDP0|WDR41_MOUSE WD repeat-containing protein 41 OS=Mus musculus OX=10090 GN=Wdr41 PE=1 SV=1	51.48	3	10.2	13.6229	14.0051	14.141	13.7409	13.9705	13.7991	13.6187	14.2778	13.8302	14.0727	13.4949	13.2953	13.6206	13.9426	13.5157	13.5656	13.9621	13.7931	13.1534	12.4169	13.7205	13.3509	13.4239	13.7905	14.0787	13.3268	13.7149	13.8395	13.4461	13.6712	13.5033	13.3281	13.9901	13.5392	13.7861	13.2171	13.0401	13.3367	13.646	13.2325	13.2993	13.6858
Q922M3	Q922M3	Kctd10	BTB/POZ domain-containing adapter for CUL3-mediated RhoA degradation protein 3	sp|Q922M3|BACD3_MOUSE BTB/POZ domain-containing adapter for CUL3-mediated RhoA degradation protein 3 OS=Mus musculus OX=10090 GN=Kctd10 PE=1 SV=1	35.68	3	13	12.3718	12.2261	12.3303	12.2647	11.6635	12.6004	12.2503	12.5738	12.3451	12.6395	11.2556	12.147	12.3478	12.073	11.9487	12.3117	12.4057	12.4165	11.8819	10.1624	12.1351	12.4037	12.2427	12.2388	12.3979	12.0758	11.936	12.0288	11.9699	11.3642	12.3047	11.9598	12.2862	12.0541	12.3528	10.9778	11.8917	12.0638	11.7764	11.6655	12.0453	12.1293
Q99LB0	Q99LB0	Dnttip1	Deoxynucleotidyltransferase terminal-interacting protein 1	sp|Q99LB0|TDIF1_MOUSE Deoxynucleotidyltransferase terminal-interacting protein 1 OS=Mus musculus OX=10090 GN=Dnttip1 PE=1 SV=1	36.83	2	5.8			13.1535	12.6041		12.2409		12.9056	12.6786	12.8166				12.7439			12.2142	12.719	12.6873	12.4538		12.3586	11.0693	12.2133				12.778	12.2353		11.8712		12.544	12.3136	12.4559				12.3734			11.8639
Q62276	Q62276	Med22	Mediator of RNA polymerase II transcription subunit 22	sp|Q62276|MED22_MOUSE Mediator of RNA polymerase II transcription subunit 22 OS=Mus musculus OX=10090 GN=Med22 PE=1 SV=2	22.27	2	10	13.2149	12.8678	13.0058	13.3476	13.0553	13.0819	12.4375	13.5171	13.3042	13.5607	12.0331	12.3788	12.7419	12.7381	13.0406	12.8172	12.4418	12.946	12.9775	12.9701	12.6351	12.8172	13.2151	12.8401	12.8433	14.3594	14.0183	14.1449	14.4933	14.1966	14.2267	13.5875	14.67	14.4537	14.7146	13.1959	13.5641	13.8985	13.8821	14.198	13.9915	13.606
Q9D1X9	Q9D1X9	Tmem50b	Transmembrane protein 50B	sp|Q9D1X9|TM50B_MOUSE Transmembrane protein 50B OS=Mus musculus OX=10090 GN=Tmem50b PE=1 SV=1	17.94	3	17.7	15.6258	15.5902	15.5947	15.7476	15.3923	15.6066	15.4642	16.0311	15.9168	15.85	14.5363	14.6481	15.5847	15.661	15.5807	15.5435	15.7095	15.8987	14.6899	14.6736	15.0334	15.8495	15.5808	15.8678	15.6841	17.5777	17.548	17.5411	17.7007	17.341	17.5588	17.4216	17.9914	17.8737	17.8113	16.5064	16.6407	17.5486	17.6124	17.5454	17.5251	17.6811
Q8BYI8	Q8BYI8	Fam234b	Protein FAM234B	sp|Q8BYI8|F234B_MOUSE Protein FAM234B OS=Mus musculus OX=10090 GN=Fam234b PE=1 SV=1	66.99	5	9.5	15.0628	15.046	15.155	15.2003	15.1678	15.0516	15.0486	15.5332	15.3771	15.5186	14.2847	14.2872	15.1071	15.1762	15.1764	15.1193	14.9986	15.3778	14.1507	14.1949	15.1894	15.2824	15.3592	15.3886	15.5962	14.2598	14.2489	14.3465	14.3985	14.3616	14.249	14.2511	14.7386	14.5792	14.725	13.5	13.525	14.3161	14.3727	14.3862	14.3461	14.2153
Q8VCM5	Q8VCM5	Mul1	Mitochondrial ubiquitin ligase activator of NFKB 1	sp|Q8VCM5|MUL1_MOUSE Mitochondrial ubiquitin ligase activator of NFKB 1 OS=Mus musculus OX=10090 GN=Mul1 PE=1 SV=2	39.81	3	9.7	13.1205	13.2173	13.2282	13.3239	13.2976	13.1086	12.878	13.4765	13.4465	13.7106		13.1099	13.1349	13.2869	13.4305	13.1753	13.1426	13.2415	13.1076	13.1038	13.1256	13.1488	13.176	13.1292	13.3479	12.7505	12.8532	12.8527	12.955	12.9243	12.7388	12.5134	13.1148	13.0815	13.35		12.7806	12.777	12.9163	13.0732	12.835	12.7922
P62307	P62307	Snrpf	Small nuclear ribonucleoprotein F	sp|P62307|RUXF_MOUSE Small nuclear ribonucleoprotein F OS=Mus musculus OX=10090 GN=Snrpf PE=1 SV=1	9.72	2	24.4	16.3715	16.0834	16.6471	16.4915	16.4316	15.835	15.9178	16.5984	16.544	16.833	15.4908	15.597	16.1791	16.0755	16.3641	15.6706	15.8434	16.3919	15.8202	16.0488	14.7981	15.6072	16.069	16.2303	16.2111	18.3234	18.0412	18.5935	18.4447	18.3802	17.7873	17.8752	18.5587	18.5009	18.7943	17.4609	17.5897	18.1431	18.0268	18.3288	17.6522	17.8149
Q9CR27	Q9CR27	Washc3	WASH complex subunit 3	sp|Q9CR27|WASC3_MOUSE WASH complex subunit 3 OS=Mus musculus OX=10090 GN=Washc3 PE=1 SV=1	21.08	2	17	12.1683	12.096	11.8069	12.9404	11.2103	11.6034	12.1477	12.6805	12.3048	12.1634			11.3324	12.8127	12.1396	12.247	11.6329	12.6322	11.949	12.088		11.4692	12.1965	12.4882	12.4067	12.7983	12.7319	12.4314	13.5716	11.837	12.2337	12.7832	13.3188	12.9398	12.8028			11.9744	13.4422	12.7823	12.9067	12.2826
Q8BUY9	Q8BUY9	Pggt1b	Geranylgeranyl transferase type-1 subunit beta	sp|Q8BUY9|PGTB1_MOUSE Geranylgeranyl transferase type-1 subunit beta OS=Mus musculus OX=10090 GN=Pggt1b PE=1 SV=1	42.33	2	6.6	14.5612	14.7075	14.1408	14.2063	13.9448	14.1502	14.4506	14.6279	14.4604	14.3283	13.6752	13.845	14.3171	13.6256	13.9537	14.1246	14.2746	14.2237	14.1283	13.1447	14.0444	14.3178	13.7434	13.9482	13.5779	14.1911	14.3434	13.7653	13.8374	13.5716	13.7805	14.086	14.2662	14.0954	13.9677	13.3234	13.5157	13.9591	13.255	13.5965	13.7843	13.9243
Q80V03	Q80V03	Adck5	Uncharacterized aarF domain-containing protein kinase 5	sp|Q80V03|ADCK5_MOUSE Uncharacterized aarF domain-containing protein kinase 5 OS=Mus musculus OX=10090 GN=Adck5 PE=2 SV=2	66.61	2	5.2	13.0172	13.6835	13.9019		12.6942	13.2677	12.7137	13.8123	13.8782	13.9016	12.1216	11.7828		13.3183	13.6984	13.3703	14.0094	13.0058	13.5455	12.499		12.6544	12.6647	13.828		11.8817	12.5538	12.7608		11.5554	12.1324	11.5836	12.6851	12.7476	12.7754	11.0043	10.6881		12.1822	12.5757	12.2645	12.8935
E9PYL2	E9PYL2	Prr12	Proline-rich protein 12	sp|E9PYL2|PRR12_MOUSE Proline-rich protein 12 OS=Mus musculus OX=10090 GN=Prr12 PE=1 SV=1	211.75	5	2.9		12.1325	12.1471	12.4996	12.347		11.4757	12.4055	12.1986	13.2311			12.0054		12.4664	11.872	11.2009	12.238	11.9715	11.8345	12.2665	11.9785	12.3616	11.5423			10.0903	10.0935	10.4527	10.2956		9.4331	10.3658	10.1555	11.1924			9.96935		10.4311	9.85363	9.17249
Q8BGT6	Q8BGT6	Micall1	MICAL-like protein 1	sp|Q8BGT6|MILK1_MOUSE MICAL-like protein 1 OS=Mus musculus OX=10090 GN=Micall1 PE=1 SV=3	94.02	2	1.8	14.1254	14.2571	14.4903	14.4724	14.4682	14.287	14.1705	14.2742	14.3571	14.3203		13.6628	14.3921	14.3744	14.3463	14.0859	14.5135	14.1819	14.0714	14.302	13.9043	14.0031	14.167	14.2587	13.9988	12.8679	13.0055	13.2273	13.2161	13.2074	13.0298	12.9184	13.025	13.1046	13.0721		12.446	13.1466	13.1163	13.1016	12.8581	13.2756
Q60612	Q60612	Adora1	Adenosine receptor A1	sp|Q60612|AA1R_MOUSE Adenosine receptor A1 OS=Mus musculus OX=10090 GN=Adora1 PE=2 SV=4	36.61	2	5.2	12.7539	12.7636	12.8282	12.9371	13.0156	12.1975	12.5359	12.8522	13.1085	13.1548	11.7281	12.3778	12.6573	12.8424	12.5468	12.2864	12.4376	12.5331	12.1025	12.3899	11.8665	12.1707	12.5128	12.5479	13.1953	14.7058	14.7214	14.7746	14.8903	14.9643	14.1497	14.4933	14.8125	15.0654	15.1161	13.6983	14.3705	14.6213	14.7938	14.5115	14.268	14.4092
A0A1L1STD6	A0A1L1STD6	Inafm2	InaF motif containing 2	tr|A0A1L1STD6|A0A1L1STD6_MOUSE InaF motif containing 2 OS=Mus musculus OX=10090 GN=Inafm2 PE=1 SV=1	15.64	2	19.7	14.7792	15.5089	15.2235	15.5879	14.8484	15.4672	15.535	15.2722	15.766	15.3755	14.824	14.0994	15.2917	15.1214	15.4049	15.3637	15.1354	15.5311	14.3016	14.0485	15.232	15.3239	15.5981	14.7875	14.9104	16.4091	17.1448	16.848	17.2191	16.4752	17.0975	17.1705	16.9105	17.401	17.0149	16.4722	15.7702	16.9337	16.7509	17.0476	17.0234	16.785
Q9CQV4	Q9CQV4	Retreg3	Reticulophagy regulator 3	sp|Q9CQV4|RETR3_MOUSE Reticulophagy regulator 3 OS=Mus musculus OX=10090 GN=Retreg3 PE=1 SV=1	51.6	3	15	14.9202	15.2165	14.9948	14.9795	15.1016	14.9097	14.7934	14.9306	15.3049	15.2754	14.3898	14.0023	14.5817	14.9524	14.9853	14.9309	14.6272	14.9068	14.5699	14.2384	14.9652	15.1408	14.985	14.9418	15.2019	14.8721	15.1743	14.9412	14.9326	15.0502	14.8619	14.7508	14.8909	15.2618	15.2367	14.3599	13.995	14.5457	14.9038	14.95	14.9125	14.5988
Q69Z89	Q69Z89	Radil	Ras-associating and dilute domain-containing protein	sp|Q69Z89|RADIL_MOUSE Ras-associating and dilute domain-containing protein OS=Mus musculus OX=10090 GN=Radil PE=1 SV=2	120.28	2	2.1	12.497	12.7762	12.7774	12.6767	12.8539	12.4707	12.5002	13.1489	12.9284	13.2359	12.1041	11.9472	12.5749	12.8398	13.1003	12.0719	12.1756	12.1368	12.3291	12.367	12.3887	12.3008	12.3157	12.5273	12.6661	11.0226	11.3077	11.2976	11.2036	11.3763	10.9967	11.0313	11.6829	11.459	11.7709	10.648	10.5137	11.1126	11.3649	11.6387	10.6272	10.7209
O35231	O35231	Kifc3	Kinesin-like protein KIFC3	sp|O35231|KIFC3_MOUSE Kinesin-like protein KIFC3 OS=Mus musculus OX=10090 GN=Kifc3 PE=1 SV=4	92.5	2	2.4			12.879	12.5032		12.8622		13.043	12.825	12.8756					12.7758			12.8093	12.0738	12.5362	13.1303	12.6946	12.5389	12.7867				11.153	10.7839		11.142		11.3309	11.1095	11.1644					11.0681
P52430	P52430	Pon1	Serum paraoxonase/arylesterase 1	sp|P52430|PON1_MOUSE Serum paraoxonase/arylesterase 1 OS=Mus musculus OX=10090 GN=Pon1 PE=1 SV=2	39.54	3	12.7	13.7266	13.6012	14.6568	13.5227	13.7031	13.5259	13.3556	14.0671	13.7792	14.0634	13.6729	13.4429	13.601	14.1757	13.4347		13.4966	13.3579	15.0724	14.1696	14.1401	13.5452	13.9174	13.4786	13.28	13.9781	13.8585	14.9028	13.7753	13.9513	13.7777	13.6125	14.3269	14.0357	14.3242	13.9426	13.7352	13.8645	14.4266	13.699		13.7677
A2A5Z6	A2A5Z6	Smurf2	E3 ubiquitin-protein ligase SMURF2	sp|A2A5Z6|SMUF2_MOUSE E3 ubiquitin-protein ligase SMURF2 OS=Mus musculus OX=10090 GN=Smurf2 PE=1 SV=1	86.12	3	4	11.2202	12.0485	12.1888		11.7446	11.5137	11.9558	11.8667	12.389	12.1285	11.3246	11.5445	11.5693	11.9187	12.2103		11.4072	11.6843	11.5969	11.0373	11.4495	11.3996	11.6205	11.7106	11.8272	9.77976	10.614	10.7429		10.3009	10.0736	10.5209	10.4346	10.9536	10.6975	9.9024	10.1449	10.1409	10.4778	10.7827		9.98649
Q9WUU9	Q9WUU9	Mcm3ap	Germinal-center associated nuclear protein	sp|Q9WUU9|GANP_MOUSE Germinal-center associated nuclear protein OS=Mus musculus OX=10090 GN=Mcm3ap PE=1 SV=2	217.23	4	3.1	11.9736	12.1344	12.1307	12.0689	12.0044	12.1432	11.9117	12.4211	12.1873	12.4511	11.7964		11.9272	12.1412	12.3187	11.8643	11.8478	11.6739	12.0097	11.9841	12.0316	12.0867	12.1817	12	12.0627	9.73564	9.90235	9.88728	9.83216	9.76318	9.90563	9.6793	10.1915	9.9544	10.2226	9.57671		9.7013	9.90274	10.0936	9.65607	9.62957
P70208	P70208	Plxna3	Plexin-A3	sp|P70208|PLXA3_MOUSE Plexin-A3 OS=Mus musculus OX=10090 GN=Plxna3 PE=1 SV=2	207.83	4	3.1	12.3081	12.489	12.2914	12.6645	12.6817	12.473	11.9671	12.8538	12.2943	13.0511	12.138		12.2307	12.5874	12.8375	11.9174	12.4302	12.7574	12.0773	12.2426	12.6226	12.2184	12.4654	12.4839	12.536	9.76812	9.95494	9.74599	10.1258	10.1385	9.93339	9.43264	10.3222	9.75942	10.5205	9.61629		9.7028	10.0469	10.3103	9.4072	9.90995
P62889	P62889	Rpl30	Large ribosomal subunit protein eL30	sp|P62889|RL30_MOUSE Large ribosomal subunit protein eL30 OS=Mus musculus OX=10090 GN=Rpl30 PE=1 SV=2	12.78	2	20	15.7738	15.8216	15.9154	16.3915	14.9746	15.2056	15.6629	16.1947	15.6756	15.5777	15.5606	15.3923	14.9756	16.0557	15.2364	15.4797	14.8782	15.8313	14.8624	14.7485	15.2725	14.8423	15.1811	15.4081	15.7182	17.1408	17.1945	17.2769	17.7596	16.3383	16.5729	17.0353	17.57	17.0476	16.9541	16.9458	16.8	16.3546	17.4221	16.6161	16.8764	16.2649
Q9ESC8	Q9ESC8	Aff4	AF4/FMR2 family member 4	sp|Q9ESC8|AFF4_MOUSE AF4/FMR2 family member 4 OS=Mus musculus OX=10090 GN=Aff4 PE=1 SV=1	126.56	7	6.7	13.082	13.1622	13.5007	13.3963	13.0793	13.1357	12.7015	13.3776	13.5371	13.4964	12.7538		13.265	13.3755	13.5459	13.0625	13.0436	13.061	13.3152	13.2129	13.4402	13.3668	13.4783	13.5611	13.6159	11.2265	11.3127	11.6397	11.542	11.2206	11.2806	10.8515	11.5305	11.6867	11.6504	10.9166		11.4216	11.5196	11.7033	11.2368	11.2078
Q7TPM9	Q7TPM9	Mtmr10	Myotubularin-related protein 10	sp|Q7TPM9|MTMRA_MOUSE Myotubularin-related protein 10 OS=Mus musculus OX=10090 GN=Mtmr10 PE=1 SV=2	88.14	4	6.5	12.5834	12.783	12.9665	13.0408		12.726				12.9385				12.4235	12.5148	13.0334	12.9	12.8935		12.7275		12.7427	12.7932			11.0759	11.2813	11.4534	11.5345		11.2188				11.4403				10.9154	11.0201	11.5556	11.4122
D3YUJ3	D3YUJ3	Ccnyl1	Cyclin Y-like 1	tr|D3YUJ3|D3YUJ3_MOUSE Cyclin Y-like 1 OS=Mus musculus OX=10090 GN=Ccnyl1 PE=1 SV=1	41.57	2	6.8	14.8702	14.7603	15.0828	15.3155	15.2974	14.9946	14.6267	15.2774	15.2347	15.707	14.2145	14.0366	15.135	14.9999	15.0616	15.1773	14.8004	15.0845	14.3467	14.1579	15.1303	14.8102	15.0755	15.2333	15.2131	14.8221	14.7181	15.0292	15.2686	15.246	14.9468	14.5841	15.2376	15.1916	15.6683	14.1846	14.0293	15.0989	14.9513	15.0263	15.1589	14.772
Q61626	Q61626	Grik5	Glutamate receptor ionotropic, kainate 5	sp|Q61626|GRIK5_MOUSE Glutamate receptor ionotropic, kainate 5 OS=Mus musculus OX=10090 GN=Grik5 PE=2 SV=2	109.21	3	3.5	14.2439	14.2895	14.1353	14.0914	14.0075	14.291	14.1847	14.5311	13.7121	14.319	13.3271	13.7161	14.204	14.13	13.9747	13.8759	14.0128	14.0365	13.086	13.2962	13.6785	14.1172	13.8763	14.1038	14.0437	12.7695	12.8211	12.6554	12.6182	12.5299	12.8169	12.7158	13.0651	12.2428	12.854	11.871	12.2826	12.7417	12.6551	12.5132	12.4313	12.5581
O55042	O55042	Snca	Alpha-synuclein	sp|O55042|SYUA_MOUSE Alpha-synuclein OS=Mus musculus OX=10090 GN=Snca PE=1 SV=2	14.48	6	50.7	22.0568	22.3198	22.414	22.6293	22.5958	22.4637	22.2534	22.4623	22.6156	22.8007	21.8634	21.2914	22.2815	22.5468	22.5004	21.7637	21.9753	21.5803	22.3878	22.2767	22.8401	22.3997	23.1569	22.5083	22.0538	23.4238	23.6926	23.7755	23.9974	23.9595	23.8309	23.6259	23.8376	23.9875	24.177	23.2486	22.6991	23.6605	23.9132	23.8802	23.1604	23.3619
P61514	P61514	Rpl37a	Large ribosomal subunit protein eL43	sp|P61514|RL37A_MOUSE Large ribosomal subunit protein eL43 OS=Mus musculus OX=10090 GN=Rpl37a PE=1 SV=2	10.27	2	29.3	13.7753	14.2413	13.7835	13.8469	13.2525	13.1647	13.6385	14.4846	13.8291	14.0524	13.2832	13.0454	13.2054	13.9875	13.3318	13.3272	13.4253	13.7108	13.5056	13.1083	13.8333	13.7361	13.9201	13.799	13.8251	15.7272	16.1991	15.73	15.8	15.2011	15.117	15.5959	16.4448	15.786	16.0137	15.2534	15.0381	15.1693	15.9389	15.2965	15.3088	15.3968
Q9D3D9	Q9D3D9	Atp5f1d	ATP synthase subunit delta, mitochondrial	sp|Q9D3D9|ATPD_MOUSE ATP synthase subunit delta, mitochondrial OS=Mus musculus OX=10090 GN=Atp5f1d PE=1 SV=1	17.59	3	32.1	22.0586	21.9846	22.1018	22.0994	21.4784	21.9865	21.3999	21.7811	22.1437	22.1852	21.7814	21.2807	21.6113	21.5927	21.7573	21.6364	20.8383	21.963	21.2359	21.3846	21.7299	21.0926	21.4682	21.533	21.328	23.6886	23.6205	23.7262	23.7305	23.1051	23.6168	23.0353	23.4194	23.7787	23.8245	23.4296	22.9515	23.2533	23.2221	23.4	23.2961	22.4879
Q8BGH4	Q8BGH4	Reep1	Receptor expression-enhancing protein 1	sp|Q8BGH4|REEP1_MOUSE Receptor expression-enhancing protein 1 OS=Mus musculus OX=10090 GN=Reep1 PE=1 SV=1	22.27	4	22.9	15.6579	15.542	15.4746	15.7411	15.491	15.5276	15.5265	15.9851	15.6742	16.0107	14.578	14.7134	15.5127	15.7635	15.5891	15.5134	15.5876	15.6385	14.8795	14.7308	15.9149	15.7657	15.8285	15.7839	16.0547	16.0249	15.9148	15.836	16.1092	15.8547	15.8948	15.8989	16.3604	16.0461	16.387	14.9632	15.1211	15.8917	16.13	15.9688	15.9101	15.9742
Q07456	Q07456	Ambp	Protein AMBP	sp|Q07456|AMBP_MOUSE Protein AMBP OS=Mus musculus OX=10090 GN=Ambp PE=1 SV=2	39	2	5.2	14.0604	13.2433	14.374	13.0705	13.6005	13.4012	13.8271	13.1469	13.5064	13.4391		13.0932	13.4338	15.0875	14.5834	13.4774		13.0847	14.0423	13.8489			13.2124		11.9614	13.7644	12.9532	14.0725	12.7757	13.3012	13.1055	13.5365	12.8593	13.2154	13.1525		12.838	13.1498	14.791	14.3001	13.2111
O35345	O35345	Kpna6	Importin subunit alpha-7	sp|O35345|IMA7_MOUSE Importin subunit alpha-7 OS=Mus musculus OX=10090 GN=Kpna6 PE=1 SV=2	59.93	5	9.7	13.804	13.8079	13.9948	14.0405	13.6332	13.5766	13.8099	14.2884	14.0776	13.8212	13.0405	13.3333	13.5719	13.7334	13.8246	13.9048	13.5547	13.71	12.9994	13.069	14.0014	14.1475	13.9057	14.104	14.2083	13.2323	13.2421	13.4177	13.4701	13.0583	13.0053	13.2437	13.7251	13.511	13.2589	12.4871	12.8024	13.0123	13.1612	13.2657	13.3628	13.0027
P01837	P01837	Igkc	Immunoglobulin kappa constant	sp|P01837|IGKC_MOUSE Immunoglobulin kappa constant OS=Mus musculus OX=10090 GN=Igkc PE=1 SV=2	11.93	2	26.2	18.5636	17.5858	17.8038	17.176	17.5902	17.0457	18.7488	16.5286	17.5743	17.7187	17.1409	16.8907	18.1127	16.6697	14.5012	16.95	18.892	17.2099	17.5216	18.3345	15.1389	14.7137	14.3037	13.8215	13.6166	20.5155	19.5436	19.7502	19.1291	19.5389	18.9979	20.7062	18.4889	19.5312	19.68	19.1111	18.8834	20.0767	18.6211	16.4659	18.9317	20.8636
P70313	P70313	Nos3	Nitric oxide synthase 3	sp|P70313|NOS3_MOUSE Nitric oxide synthase 3 OS=Mus musculus OX=10090 GN=Nos3 PE=1 SV=4	132.83	2	2.6	12.3767	12.5131	12.8723	12.0277		12.234		12.2811	12.514	12.7572				12.6216	12.991		12.5049	12.263	12.3792	12.3229	12.2785	12.5436	12.1965	12.427		10.4217	10.564	10.9118	10.0739		10.2794		10.3345	10.564	10.8116				10.6661	11.0488		10.5696
Q8BGU5	Q8BGU5	Ccny	Cyclin-Y	sp|Q8BGU5|CCNY_MOUSE Cyclin-Y OS=Mus musculus OX=10090 GN=Ccny PE=1 SV=1	39.37	4	14.7	16.1511	16.2266	16.2487	16.2808	16.0171	16.2592	16.3273	16.5762	16.5775	16.6629	15.3449	15.3957	16.3111	16.0933	16.3631	16.3226	16.3764	16.4583	15.3389	15.2292	16.3212	16.3083	16.5194	16.3873	16.6314	15.8551	15.9365	15.9472	15.986	15.7179	15.9635	16.0368	16.2885	16.2865	16.3763	15.0671	15.1405	16.0272	15.7967	16.0799	16.0563	16.1001
Q8R2U0	Q8R2U0	Seh1l	Nucleoporin SEH1	sp|Q8R2U0|SEH1_MOUSE Nucleoporin SEH1 OS=Mus musculus OX=10090 GN=Seh1l PE=2 SV=1	39.75	4	13.1	15.732	15.9785	16.0551	16.1315	16.0466	16.0054	15.6696	16.2235	16.0566	16.1285	15.1371	15.3988	15.9957	15.8512	15.9076	15.8702	15.5661	15.76	15.3391	15.1251	15.826	15.2921	15.8097	15.3717	15.9488	15.2916	15.544	15.6092	15.6923	15.603	15.5653	15.2347	15.7914	15.6212	15.6974	14.7149	14.9992	15.5673	15.4103	15.48	15.4595	15.1454
O35682	O35682	Myadm	Myeloid-associated differentiation marker	sp|O35682|MYADM_MOUSE Myeloid-associated differentiation marker OS=Mus musculus OX=10090 GN=Myadm PE=1 SV=2	35.26	2	8.4	16.9307	16.769	16.6694	16.58	16.4713	16.6737	16.6047	16.6922	16.6169	16.7364	16.3079	16.4173	16.532	15.9982	16.5049	16.7707	16.3434	16.3244	15.7236	15.747	15.7624	15.4905	15.462	14.9257	15.1488	17.7127	17.5569	17.4459	17.3632	17.2501	17.4559	17.3921	17.4826	17.4039	17.5278	17.1082	17.2401	17.326	16.7796	17.2997	17.5824	17.1451
Q9EPC1	Q9EPC1	Parva	Alpha-parvin	sp|Q9EPC1|PARVA_MOUSE Alpha-parvin OS=Mus musculus OX=10090 GN=Parva PE=1 SV=1	42.3	4	14	14.809	15.2228	15.4792	14.9829	14.8392	14.9804	14.941	14.6971	15.1198	14.7978	14.5347	13.8908	14.8522	15.0887	14.9027	14.3445	14.6499	14.1097	14.9146	14.5182	15.1808	14.9744	14.9351	15.116	13.6327	14.591	15.0107	15.2557	14.7661	14.618	14.7626	14.7284	14.4874	14.9068	14.5892	14.3349	13.7136	14.6462	14.8702	14.6975	14.1562	14.4516
Q8BGN2	Q8BGN2	D3Ertd751e	UPF0462 protein C4orf33 homolog	sp|Q8BGN2|CD033_MOUSE UPF0462 protein C4orf33 homolog OS=Mus musculus OX=10090 GN=D3Ertd751e PE=2 SV=1	22.45	3	24.5	15.23	15.2691	14.9209	15.1737	15.0373	15.1944	14.8091	15.3256	15.2529	15.1113	14.5616	14.0635	14.9279	14.5364	15.2421	15.4093	15.0396	15.2688	14.0635	14.1487	13.9179	14.7137	14.3603	14.3849	13.917	15.597	15.642	15.2823	15.5418	15.401	15.5616	15.1815	15.7009	15.6248	15.4876	14.9468	14.4712	15.3068	14.9028	15.6218	15.8059	15.4263
P48725	P48725	Pcnt	Pericentrin	sp|P48725|PCNT_MOUSE Pericentrin OS=Mus musculus OX=10090 GN=Pcnt PE=1 SV=2	329.26	2	0.9	10.8976	11.682	10.8739	11.2565	10.6905	11.2915	11.0913	11.5903	11.4561	11.5085		11.2784	10.9993	11.3088	10.9288	10.8783	10.6858	10.9967	10.9152	10.2293				10.9626	11.1712	7.55485	8.34521	7.52571	7.91503	7.34456	7.94907	7.75404	8.25598	8.11839	8.1752		7.9765	7.66865	7.96558	7.59887	7.56531	7.36278
P48759	P48759	Ptx3	Pentraxin-related protein PTX3	sp|P48759|PTX3_MOUSE Pentraxin-related protein PTX3 OS=Mus musculus OX=10090 GN=Ptx3 PE=1 SV=2	41.78	4	11.5	14.6101	14.9942	14.8526	14.1416	14.4067	15.17	13.727		14.6191	13.698	14.5247	13.2091	14.3527	13.5718	14.9161	13.8197	14.2214		13.5436	14.3847						14.1026	14.4926	14.3396	13.6352	13.8959	14.6628	13.2249		14.1166	13.1999	14.0354	12.7423	13.8572	13.0638	14.4214	13.3418	13.7336
Q61120	Q61120	Shc3	SHC-transforming protein 3	sp|Q61120|SHC3_MOUSE SHC-transforming protein 3 OS=Mus musculus OX=10090 GN=Shc3 PE=1 SV=2	52.09	3	7.4	13.1244	13.4231		13.8313	13.5739	13.4612	13.0972	13.9953	13.6655	13.8712	12.7261	12.5826	13.3784	13.7526	13.5668	13.0195		13.031	13.1192	13.1475	14.0646	13.5382	13.5765	13.933	13.4644	12.3759	12.6805		13.084	12.8221	12.713	12.3541	13.2551	12.922	13.1321	11.9958	11.8749	12.6419	13.0036	12.8311	12.3007
Q3SXD3	Q3SXD3	Hddc2	5'-deoxynucleotidase HDDC2	sp|Q3SXD3|HDDC2_MOUSE 5'-deoxynucleotidase HDDC2 OS=Mus musculus OX=10090 GN=Hddc2 PE=1 SV=1	22.74	5	30.7	13.4519	13.43	13.6589	13.5219	13.6322	13.9518	13.4725	14.0213	13.8267	13.9414	13.4834	13.6447	13.506	13.646	13.3302	14.0673	13.6211	13.4339	13.6584		13.1084	13.6363	13.9728	13.5874	13.6775	14.0818	14.0659	14.2834	14.1531	14.2589	14.582	14.108	14.6596	14.4617	14.5808	14.1316	14.3155	14.148	14.2754	13.973	14.727	14.2707
Q9D8M7	Q9D8M7	Phf10	PHD finger protein 10	sp|Q9D8M7|PHF10_MOUSE PHD finger protein 10 OS=Mus musculus OX=10090 GN=Phf10 PE=1 SV=4	55.8	3	6.4	11.631	11.7865	12.0254	11.7855	11.7725	11.8272	11.1966	12.2501	12.2415	12.2426	10.9114	11.1954	11.5213	12.0336	11.6977	11.5873	11.4628	11.4092	11.5476	11.3526	12.2453	11.9593	12.3357	12.1313	11.9963	11.1906	11.352	11.5795	11.3463	11.3288	11.3871	10.7617	11.818	11.8061	11.8116	10.4892	10.7957	11.0929	11.5927	11.2701	11.1766	11.0421
Q8C5P7	Q8C5P7	Tdrp	Testis development-related protein	sp|Q8C5P7|TDRP_MOUSE Testis development-related protein OS=Mus musculus OX=10090 GN=Tdrp PE=1 SV=1	20.17	2	12.6	13.2471	13.3413	13.5147	13.559	13.2536	13.2706	13.6705	13.8334	13.9586	13.7611	12.6933	12.9335	13.0051	13.2935	13.5503	13.22	12.7573	13.4455	13.294	13.1927	13.1546	13.4879	13.5738	13.4525	13.6271	13.8771	13.9772	14.1392	14.1901	13.8803	13.9009	14.3059	14.4717	14.5936	14.4005	13.3415	13.6043	13.6471	13.923	14.1931	13.8797	13.407
Q8BKF1	Q8BKF1	Polrmt	DNA-directed RNA polymerase, mitochondrial	sp|Q8BKF1|RPOM_MOUSE DNA-directed RNA polymerase, mitochondrial OS=Mus musculus OX=10090 GN=Polrmt PE=1 SV=1	136.62	4	3.4	12.0752	12.2543	12.3775	12.2745	12.3037	11.835	11.898	12.6832	12.5252	12.4037		11.1173	12.3744	12.066	12.3194	12.2882	11.9815	12.3671	12.1082	11.8195	12.2139	12.449	12.2111	12.3938	12.0912	10.2992	10.4842	10.596	10.4997	10.5244	10.0593	10.1274	10.9155	10.7542	10.6371		9.38202	10.6105	10.2894	10.5562	10.5419	10.2252
Q60767	Q60767	Ly75	Lymphocyte antigen 75	sp|Q60767|LY75_MOUSE Lymphocyte antigen 75 OS=Mus musculus OX=10090 GN=Ly75 PE=1 SV=2	197.23	3	3.5	13.3522	13.4317	13.8593	13.351		13.0962	13.4595	13.5078	13.5076	13.4933		12.3481	13.5385	13.5643	13.8706	13.4325	12.8037	13.0262	12.4839	11.6524	13.3714	13.4055	13.3922	13.4291	12.2489	10.9466	11.032	11.4482	10.9465		10.6909	11.0594	11.1105	11.1069	11.097		9.98328	11.1449	11.1581	11.4777	11.0565	10.4177
Q5DU02	Q5DU02	Usp22	Ubiquitin carboxyl-terminal hydrolase 22	sp|Q5DU02|UBP22_MOUSE Ubiquitin carboxyl-terminal hydrolase 22 OS=Mus musculus OX=10090 GN=Usp22 PE=2 SV=2	59.91	2	4	10.9714	11.2755	11.4774			11.3678	11.3828		11.8134	11.8245		10.9761			10.9885			12.2514	11.1816	12.0297	11.5096	11.2616	12.0548	11.3719	11.8562	10.3383	10.6483	10.8389			10.735	10.7552		11.1853	11.2009		10.3838			10.3683
Q5ND52	Q5ND52	Mrm3	rRNA methyltransferase 3, mitochondrial	sp|Q5ND52|MRM3_MOUSE rRNA methyltransferase 3, mitochondrial OS=Mus musculus OX=10090 GN=Mrm3 PE=2 SV=1	46.77	3	9.3	13.6367	13.9198	13.9605	13.9716	14.0191	13.8031	13.8219	14.1958	14.2587	14.1709	13.3732	13.2389	13.8984	13.9534	13.987	13.2987	13.6223	13.4777	13.5665	13.3362	13.6871	13.7829	13.7362	13.6691	13.6279	13.5886	13.8777	13.9069	13.9247	13.9678	13.7553	13.7793	14.1561	14.2157	14.1322	13.3434	13.2315	13.8623	13.9048	13.9517	13.2803	13.5939
E9Q512	E9Q512	Trip11	Thyroid hormone receptor interactor 11	tr|E9Q512|E9Q512_MOUSE Thyroid hormone receptor interactor 11 OS=Mus musculus OX=10090 GN=Trip11 PE=1 SV=1	226.32	22	14.3	13.8346	13.8485	13.9082	14.0756	14.0432	13.8347	13.739	14.0784	14.0082	14.256	13.374	13.0512	13.7071	13.9966	14.022	13.2146	13.2066	13.372	13.9332	13.7602	13.9435	13.7585	14.5421	13.9592	13.6614	10.9411	10.9609	11.0091	11.1832	11.1463	10.9414	10.8509	11.1932	11.1196	11.3718	10.4987	10.1984	10.8256	11.1025	11.1412	10.3508	10.3327
Q8R4S0	Q8R4S0	Ppp1r14c	Protein phosphatase 1 regulatory subunit 14C	sp|Q8R4S0|PP14C_MOUSE Protein phosphatase 1 regulatory subunit 14C OS=Mus musculus OX=10090 GN=Ppp1r14c PE=1 SV=1	17.74	6	49.4	14.9133	14.9118	14.5491	15.1206	14.5325	14.7796	14.3086	14.7594	14.9299	15.0259	13.7985	14.0534	14.3317	14.5107	14.5886	14.5728	14.6937	14.8724	14.234	14.1881	15.026	14.9356	15.1843	15.1838	15.5616	16.2803	16.2846	15.9105	16.4888	15.8962	16.1469	15.681	16.1347	16.3018	16.4023	15.1837	15.4611	15.7107	15.8771	15.9683	15.9695	16.0803
Q8K3Z9	Q8K3Z9	Pom121	Nuclear envelope pore membrane protein POM 121	sp|Q8K3Z9|PO121_MOUSE Nuclear envelope pore membrane protein POM 121 OS=Mus musculus OX=10090 GN=Pom121 PE=1 SV=2	120.95	2	1.5	11.1435		11.8031	12.1988				11.1334	12.1385	12.127			11.4057	12.0577	12.0884	11.5545	11.1881	11.2043	11.2046		11.7251	10.9529	12.3251	12.2975	11.9223	9.96613		10.6202	11.0227				9.96434	10.9661	10.959			10.2404	10.8798	10.9239	10.4069	10.0304
Q8BVY0	Q8BVY0	Rsl1d1	Ribosomal L1 domain-containing protein 1	sp|Q8BVY0|RL1D1_MOUSE Ribosomal L1 domain-containing protein 1 OS=Mus musculus OX=10090 GN=Rsl1d1 PE=1 SV=1	50.39	4	11.3	13.2653	13.3461	13.7274	13.6545	13.4694	13.5918	13.1061	13.2494	13.9647	13.8319	12.4734	12.2702	13.2186	14.0172	13.721	12.7952	12.9138	12.8828	13.6927	13.242	13.975	13.6775	14.1094	13.6803	13.1893	13.0473	13.1339	13.5039	13.4377	13.2481	13.3741	12.8936	13.0397	13.7517	13.6233	12.2736	12.0929	13.0127	13.7986	13.5158	12.6069	12.7154
Q6NZA9	Q6NZA9	Taf9b	Transcription initiation factor TFIID subunit 9B	sp|Q6NZA9|TAF9B_MOUSE Transcription initiation factor TFIID subunit 9B OS=Mus musculus OX=10090 GN=Taf9b PE=1 SV=2	27.16	4	15.7	13.8057	13.8835	14.0502	14.2113	14.0362	13.91	13.7579	14.2229	14.2361	14.3641	13.1306	13.207	13.9965	14.0428	14.0917	13.7162	13.6947	13.5056	13.4972	13.6228	13.7929	13.8627	14.0646	13.993	13.8196	13.6702	13.7538	13.9092	14.0769	13.8973	13.7747	13.6278	14.0957	14.1056	14.238	13.0132	13.1122	13.8729	13.9067	13.969	13.6104	13.5788
P32648	P32648	Vip	VIP peptides	sp|P32648|VIP_MOUSE VIP peptides OS=Mus musculus OX=10090 GN=Vip PE=1 SV=1	19.04	3	22.9	13.4959	13.6117	13.5185	13.8231	13.9262	13.4702	13.5802	14.2404	13.7965	14.3837	12.8808	13.225	13.4905	13.9301	13.8727	13.6181	12.6637	13.6623	13.1509	13.3831	13.8145	13.7128	13.5985	13.9873	13.958	14.1259	14.2476	14.143	14.4543	14.5529	14.1005	14.2157	14.8787	14.4315	15.023	13.529	13.8957	14.1325	14.5596	14.5155	14.2777	13.3133
A2AK42	A2AK42;A2AK44;Q8C5N3	Cwc22rt5	Pre-mRNA-splicing factor CWC22 homolog	tr|A2AK42|A2AK42_MOUSE Pre-mRNA-splicing factor CWC22 homolog OS=Mus musculus OX=10090 GN=Cwc22rt5 PE=3 SV=1	95.61	4	4.2	12.1814	12.2601	12.5146	12.6012	12.3813	12.1992	12.3066	12.2814	12.4731	12.6218	12.1616	11.5468	12.3339	12.2767	12.4097	11.9189	11.6749	12.0165	12.0673	11.4458	12.0073	12.3991	12.5827	12.3535	11.9008	10.8854	10.97	11.2131	11.3064	11.082	10.9035	11.016	10.9937	11.1821	11.3352	10.8838	10.2916	11.0499	10.9802	11.1265	10.6526	10.3985
Q6PIP5	Q6PIP5	Nudcd1	NudC domain-containing protein 1	sp|Q6PIP5|NUDC1_MOUSE NudC domain-containing protein 1 OS=Mus musculus OX=10090 GN=Nudcd1 PE=1 SV=2	66.66	5	11.5	15.8818	16.0383	15.9522	15.9872	15.9685	15.881	15.9298	16.2517	16.1309	16.2994	14.7833	14.9415	15.9769	16.1551	15.9909	16.0244	16.0555	16.3715	14.9212	15.1349	16.0925	16.1622	16.1718	16.2577	16.4286	14.9268	15.0892	14.9917	15.0334	15.0102	14.9263	14.9803	15.305	15.1809	15.3538	13.8466	14.0273	15.034	15.1996	15.0487	15.0991	15.1202
Q8VD24	Q8VD24	Zcchc18	Zinc finger CCHC domain-containing protein 18	sp|Q8VD24|ZCC18_MOUSE Zinc finger CCHC domain-containing protein 18 OS=Mus musculus OX=10090 GN=Zcchc18 PE=2 SV=1	43.95	2	5.9	12.8322	13.3351	13.1185	13.5228	13.446	13.1366	12.7121	13.5143	13.4391	13.6143	12.6713	12.5582	12.8119	13.1042	13.1992	12.409	13.1163	12.9401	13.1571	12.748	13.2523	13.3613	13.3988	13.4535	13.4002	12.6967	13.2055	12.9775	13.3885	13.3072	13.0014	12.582	13.3871	13.3086	13.4881	12.554	12.4634	12.6883	12.9682	13.0765	12.3032	13.0004
Q923G2	Q923G2	Polr2h	DNA-directed RNA polymerases I, II, and III subunit RPABC3	sp|Q923G2|RPAB3_MOUSE DNA-directed RNA polymerases I, II, and III subunit RPABC3 OS=Mus musculus OX=10090 GN=Polr2h PE=1 SV=3	17.13	3	26.7	14.8593	14.9395	15.0273	15.0243	14.9761	14.9032	15.002	15.2655	15.1789	15.2603	14.0736	14.3751	14.8789	14.8069	15.0152	14.9629	15.0247	15.2424	14.1684	13.9412	14.8319	15.1243	15.1753	15.0585	15.1419	15.6413	15.7274	15.8038	15.8075	15.7549	15.6855	15.7894	16.0558	15.9659	16.0516	14.8738	15.1978	15.6729	15.5883	15.81	15.7746	15.8264
Q9QZQ8	Q9QZQ8	Macroh2a1	Core histone macro-H2A.1	sp|Q9QZQ8|H2AY_MOUSE Core histone macro-H2A.1 OS=Mus musculus OX=10090 GN=Macroh2a1 PE=1 SV=4	39.27	9	32.5	17.7076	17.8226	18.4121	18.3712	18.2548	18.1259	17.8698	17.7634	18.2598	18.2972	17.2464	17.1458	18.0504	18.546	18.3751	17.4	17.5456	17.195	17.9883	17.4482	18.1662	17.9444	18.6093	18.2359	17.597	17.6595	17.7804	18.3585	18.3243	18.2034	18.0781	17.8272	17.7236	18.2167	18.2585	17.2165	17.1385	18.0143	18.4974	18.3398	17.3816	17.5172
P00158	P00158	Mt-Cyb	Cytochrome b	sp|P00158|CYB_MOUSE Cytochrome b OS=Mus musculus OX=10090 GN=Mt-Cyb PE=1 SV=1	43.18	3	8.1	17.8587	18.1157	18.4771	18.158	18.4746	18.0488	18.2274	18.4962	18.6457	18.9757	17.4966	17.9794	18.1492	17.8834	17.9797	18.1972	18.0928	18.0683	17.9781	17.7139	17.3101	18.1231	18.0628	17.7036	18.3289	19.4887	19.7516	20.1016	19.7892	20.1013	19.6791	19.8629	20.1345	20.2807	20.615	19.1448	19.6502	19.7912	19.5128	19.6225	19.8569	19.7425
Q8BM13	Q8BM13	Olfm2	Noelin-2	sp|Q8BM13|NOE2_MOUSE Noelin-2 OS=Mus musculus OX=10090 GN=Olfm2 PE=1 SV=2	50.69	5	9.6	13.5401	13.2101	13.568	13.8134	14.0275	13.6132	13.4201	14.4427	13.7936	14.3344	12.6129	13.0454	13.5154	14.1665	13.7358	13.628	13.0374	14.0781	12.7659	13.2391	14.1453	13.6043	13.4403	14.1275	14.0115	13.3221	12.998	13.3445	13.5966	13.8062	13.3955	13.2076	14.2331	13.5806	14.1258	12.4131	12.8682	13.3094	13.948	13.5306	13.4397	12.8391
O88888	O88888	Apba3	Amyloid-beta A4 precursor protein-binding family A member 3	sp|O88888|APBA3_MOUSE Amyloid-beta A4 precursor protein-binding family A member 3 OS=Mus musculus OX=10090 GN=Apba3 PE=1 SV=1	60.68	2	3.3	12.9768	12.8323	13.0675	12.5572	12.9001	12.7132	12.511	13.1279	13.2107	13.1274	12.8315	12.7971	12.8408	12.8426	13.1034	12.7492	12.9548	13.0994	12.831		12.807	12.2063	12.7524	12.756	12.711	12.8412	12.7027	12.9265	12.4229	12.7613	12.578	12.381	13.0007	13.0801	13.0013	12.7142	12.7023	12.7173	12.7065	12.9806	12.6434	12.8389
Q9CYS6	Q9CYS6		Uncharacterized protein C2orf72 homolog	sp|Q9CYS6|CB072_MOUSE Uncharacterized protein C2orf72 homolog OS=Mus musculus OX=10090 PE=1 SV=2	30.3	3	16.8	16.8054	16.8386	16.9944	16.9802	16.6811	16.8671	16.6788	16.8807	17.0253	16.9864	16.2735	16.2571	16.9819	16.5868	16.7411	16.9071	16.6981	16.6305	15.7178	16.0193	16.6089	16.4459	16.5141	16.4845	16.553	16.8505	16.8896	17.0339	17.0264	16.7228	16.9125	16.7293	16.9341	17.0753	17.0408	16.3368	16.3429	17.0389	16.6313	16.7989	16.9819	16.7628
Q60952	Q60952	Cep250	Centrosome-associated protein CEP250	sp|Q60952|CP250_MOUSE Centrosome-associated protein CEP250 OS=Mus musculus OX=10090 GN=Cep250 PE=1 SV=4	276.65	4	2.9	11.5194	11.2197	12.1439	11.6115	11.9374	11.9326	10.9288	11.4656	11.8625	11.9596		10.9873	11.3344	11.6259	11.8361	12.0858	11.3307	11.6382	11.1107	10.8459	11.8627	10.5687	11.7884	11.5504	11.4302	8.31147	8.01768	8.9304	8.40476	8.72617	8.72496	7.72633	8.26594	8.65952	8.761		7.82016	8.13846	8.41737	8.64091	8.90753	8.14245
G3X942	G3X942	Galnt9	Polypeptide N-acetylgalactosaminyltransferase	tr|G3X942|G3X942_MOUSE Polypeptide N-acetylgalactosaminyltransferase OS=Mus musculus OX=10090 GN=Galnt9 PE=1 SV=1	68.66	3	4.6	12.8761	12.5396	12.6836			12.8218		12.473	12.8645	13.0043	12.5398	12.2022	11.9667	12.4415			12.5267	12.756	12.3567			12.3391	12.4772	12.5313	12.8276	12.0206	11.69	11.8226			11.9667		11.6259	12.0141	12.1582	11.7025	11.3875	11.1233	11.5856			11.6909
Q3UFS4	Q3UFS4	Gpatch11	G patch domain-containing protein 11	sp|Q3UFS4|GPT11_MOUSE G patch domain-containing protein 11 OS=Mus musculus OX=10090 GN=Gpatch11 PE=1 SV=2	30.59	2	8.8	13.3796	13.2413	13.4834	13.5832	13.4632	13.5305	13.0803	13.6665	13.7121	13.8597	12.7405	12.6378	13.4738	13.5335	13.3756	13.0883	13.1943	13.4024	12.9822	12.6669	13.5757	13.529	13.4794	13.3926	13.5186	13.4246	13.2923	13.5229	13.6294	13.5049	13.5758	13.1308	13.7198	13.7622	13.9141	12.8038	12.7235	13.5308	13.578	13.4335	13.163	13.259
Q9R1K9	Q9R1K9	Cetn2	Centrin-2	sp|Q9R1K9|CETN2_MOUSE Centrin-2 OS=Mus musculus OX=10090 GN=Cetn2 PE=1 SV=1	19.78	4	25	13.4963	13.3835	13.1178	13.2406	12.7079	13.3263	13.5241	12.9091	13.1511	13.1772	12.7073	12.2649	12.9623	13.6035	12.9043	13.2239	12.8868	13.3747	12.0994	12.1037	13.1878	13.1271	12.9104	13.2566	13.4082	14.2783	14.1714	13.8943	14.0237	13.4866	14.1086	14.3115	13.6995	13.9381	13.9685	13.5075	13.0876	13.7564	14.385	13.6991	14.0356	13.6885
Q9D2P8	Q9D2P8	Mobp	Myelin-associated oligodendrocyte basic protein	sp|Q9D2P8|MOBP_MOUSE Myelin-associated oligodendrocyte basic protein OS=Mus musculus OX=10090 GN=Mobp PE=1 SV=1	19.19	6	30	16	15.6953	15.979	16.5447	15.8391	15.7102	15.2115	15.5274	15.7308	15.483	16.0154	14.4575	14.7743	15.3129	15.5183	16.0985	15.4138	15.1242	15.5831	15.5225	14.2303	14.9816	14.3858	14.784	14.7659	17.63	17.3312	17.6035	18.1759	17.4658	17.3405	16.847	17.1657	17.3658	17.1224	17.6636	16.1283	16.4163	16.9424	17.1611	17.7582	17.0634
Q80X32	Q80X32		UPF0461 protein C5orf24 homolog	sp|Q80X32|CE024_MOUSE UPF0461 protein C5orf24 homolog OS=Mus musculus OX=10090 PE=2 SV=1	20.13	2	13.3	12.8262	13.0798	13.1053	13.4857	12.9724	12.7439	13.0422	13.2745	13.3308	13.1711	12.2816	12.5416	12.9594	12.8948	12.4197	12.8951	12.4221	12.7565	13.0137	12.9695	12.9838	13	13.0678	12.0125	13.2658	13.9707	14.2303	14.2444	14.6315	14.1137	13.8887	14.1922	14.4274	14.4804	14.325	13.4444	13.7269	14.116	14.0389	13.577	14.0694	13.5863
Q9JJV0	Q9JJV0	Cryba4	Beta-crystallin A4	sp|Q9JJV0|CRBA4_MOUSE Beta-crystallin A4 OS=Mus musculus OX=10090 GN=Cryba4 PE=2 SV=3	22.45	2	12.2	15.3047	15.4907	15.0962	15.1677	15.3605	15.1596	14.9744	15.5134	15.5238	15.3258	14.5512	14.6864	14.8449	15.0652	15.3	14.9541	15.0831	15.2392	14.7087	14.6083	14.7862	15.2745	14.9828	15.0877	15.1182	16.0867	16.2786	15.8727	15.9509	16.1392	15.9419	15.7618	16.3037	16.3108	16.1171	15.3514	15.5092	15.6389	15.8467	16.0948	15.7658	15.8847
Q8R3B7	Q8R3B7	Brd8	Bromodomain-containing protein 8	sp|Q8R3B7|BRD8_MOUSE Bromodomain-containing protein 8 OS=Mus musculus OX=10090 GN=Brd8 PE=1 SV=2	102.55	2	3	13.6943	13.5353	13.9008	13.9456	13.736	13.7443	13.613	13.9975	14.0551	14.0688	12.9887	13.0713	13.8364	13.607	13.9437	13.7178	13.4533	13.501	13.2909	13.0083	13.9203	13.7216	13.9523	13.8893	13.6653	12.3608	12.2077	12.5618	12.6133	12.3993	12.4111	12.285	12.6724	12.7266	12.7447	11.6734	11.7786	12.5149	12.273	12.623	12.414	12.1395
Q922G2	Q922G2	Fam76a	Protein FAM76A	sp|Q922G2|FA76A_MOUSE Protein FAM76A OS=Mus musculus OX=10090 GN=Fam76a PE=2 SV=1	35.07	2	7.2	12.6001	12.5021	12.8442	13.1873	13.0167	12.3995	12.5335	12.8439	12.772	13.3388	12.3576	12.7459	12.6716	12.8422	12.8593		12.3964	12.7258	12.9067	12.7352	11.5673	12.683	12.8841	13.0357	12.7681	12.3821	12.29	12.6207	12.9704	12.7954	12.1818	12.3209	12.6342	12.559	13.1301	12.1578	12.5687	12.4656	12.6236	12.6541		12.198
P70274	P70274	Selenop	Selenoprotein P	sp|P70274|SEPP1_MOUSE Selenoprotein P OS=Mus musculus OX=10090 GN=Selenop PE=1 SV=3	42.69	5	16.3	13.9774	14.2612	14.6834	14.0056	14.0055	13.9262	13.9365	14.2342	14.3405	14.187	13.0397	13.2612	14.012	14.3563	14.2643	14.2253	13.8836	13.971	13.5096	13.175	13.4953	13.7475	13.8617	13.7417	13.7026	13.6074	13.8971	14.3079	13.6368	13.6322	13.5565	13.572	13.8726	13.9755	13.8264	12.6879	12.9319	13.6541	13.9857	13.9071	13.885	13.5333
Q4QQM5	Q4QQM5	Miga1	Mitoguardin 1	sp|Q4QQM5|MIGA1_MOUSE Mitoguardin 1 OS=Mus musculus OX=10090 GN=Miga1 PE=1 SV=1	67.49	5	13.8	14.9658	14.8559	14.6813		14.7545	14.5665	14.5635	14.8229	14.6359	15.2425	14.3953	14.6125		14.5967	14.667	14.6422	14.7194	14.5271	14.4408	14.0916	14.9449	14.8616	14.2596	14.6468	14.8452	13.9177	13.8137	13.6277		13.7032	13.5187	13.5209	13.7832	13.5928	14.2038	13.3654	13.6052		13.5481	13.6317	13.6239	13.691
Q8BG30	Q8BG30	Nelfa	Negative elongation factor A	sp|Q8BG30|NELFA_MOUSE Negative elongation factor A OS=Mus musculus OX=10090 GN=Nelfa PE=1 SV=1	57.55	4	8.9	13.1571	13.6011	13.5579	13.5604	13.3399	13.505	13.5763	13.4624	13.6628	13.7306	13.0772	12.4497	13.2459	13.6005	13.503	12.8148	13.2136	12.9859	13.365	13.0417	13.4291	13.5241	13.5198	13.4207	13.0572	12.7167	13.1666	13.112	13.1212	12.8962	13.0649	13.1413	13.0303	13.2274	13.2996	12.655	12.0501	12.8175	13.1596	13.0754	12.4041	12.7929
P0C673	P0C673	Igsf11	Immunoglobulin superfamily member 11	sp|P0C673|IGS11_MOUSE Immunoglobulin superfamily member 11 OS=Mus musculus OX=10090 GN=Igsf11 PE=1 SV=1	46.04	2	4.7	15.468	15.6814	15.5937	15.7988	15.704	15.3613	15.1303	15.7776	15.9563	15.8238	15.389	14.6027	15.3081	15.6067	15.4102	14.7313	15.4068	15.1466	15.5531	15.2927	14.2573	15.1328	15.163	15.1026	15.1326	15.7195	15.9387	15.8397	16.0515	15.9522	15.6131	15.3873	16.0374	16.2128	16.0846	15.6586	14.8949	15.5716	15.8576	15.6745	15.0125	15.678
Q64511	Q64511	Top2b	DNA topoisomerase 2-beta	sp|Q64511|TOP2B_MOUSE DNA topoisomerase 2-beta OS=Mus musculus OX=10090 GN=Top2b PE=1 SV=2	181.8	20	13.6	16.0976	16.4066	16.7012	16.7059	16.5548	16.4985	16.2745	16.422	16.7659	16.6305	15.6627	15.1577	16.3107	16.7822	16.6302	16.0345	15.9342	16.057	16.5289	16.114	16.7624	16.4689	16.9084	16.7302	16.2642	13.6066	13.9215	14.2047	14.2161	14.0605	14.0078	13.7889	13.9393	14.2799	14.1489	13.1899	12.7074	13.8317	14.2907	14.1519	13.5732	13.4629
Q9DCI9	Q9DCI9	Mrpl32	Large ribosomal subunit protein bL32m	sp|Q9DCI9|RM32_MOUSE Large ribosomal subunit protein bL32m OS=Mus musculus OX=10090 GN=Mrpl32 PE=1 SV=1	21.72	2	13.9	14.8728	14.7638	14.6216	14.5362	14.4168	14.6189	14.6525	14.7976	14.4054	14.5184	13.9712	14.0873	14.6294	14.4006	14.4613	14.5269	14.5437	14.1691	13.9217	13.6483	14.4041	14.6241	14.1748	14.2447	14.1019	15.3652	15.2622	15.1086	15.0299	14.906	15.1117	15.1505	15.2984	14.9029	15.0203	14.4819	14.6206	15.1339	14.8926	14.9666	15.0491	15.0559
Q64467	Q64467	Gapdhs	Glyceraldehyde-3-phosphate dehydrogenase, testis-specific	sp|Q64467|G3PT_MOUSE Glyceraldehyde-3-phosphate dehydrogenase, testis-specific OS=Mus musculus OX=10090 GN=Gapdhs PE=1 SV=1	47.63	2	5.7	20.9857	20.8693	21.055	22.0119	20.7729	20.6326	20.9724	21.4068	21.4071	21.0647	20.2143	20.7594	20.703	21.3594	21.1419	20.7943	20.4428	21.0888	20.2806	20.5535	20.2989	20.0091	20.4705	20.6946	20.7434	20.8501	20.7397	20.9139	21.8776	20.6341	20.4974	20.8423	21.2796	21.2766	20.9385	20.097	20.6646	20.5795	21.2233	21.0191	20.6884	20.3269
Q9D8I2	Q9D8I2	P2ry13	P2Y purinoceptor 13	sp|Q9D8I2|P2Y13_MOUSE P2Y purinoceptor 13 OS=Mus musculus OX=10090 GN=P2ry13 PE=2 SV=2	38.7	2	5.9			12.5728	12.2256	12.4513	12.215	11.9126	12.6067	12.123	12.8234	11.8404		12.4212		12.1807	12.1688	12.4609	12.2582	11.8176		12.1052	12.334	12.3687	12.3498	12.342			13.0598	12.7193	12.9405	12.7078	12.4105	13.1075	12.6205	13.3253	12.3511		12.9257		12.686	12.691	12.9731
Q9CXL3	Q9CXL3		Uncharacterized protein C7orf50 homolog	sp|Q9CXL3|CG050_MOUSE Uncharacterized protein C7orf50 homolog OS=Mus musculus OX=10090 PE=1 SV=3	22.15	2	11.3	13.0026	13.0494	13.1807	12.9835	12.9328	13.1858	12.9799	12.9475	13.3372	13.2502	12.7648	12.3458	13.1427	12.986	13.0406	13.0689	13.1212		12.8164	12.9389	13.0517	13.0431	13.2229	12.9373	12.7961	13.3695	13.4222	13.5422	13.3516	13.2965	13.553	13.3523	13.3228	13.7092	13.6265	13.1499	12.7535	13.5217	13.3525	13.4203	13.4656	13.5078
Q5SX79	Q5SX79	Shroom1	Protein Shroom1	sp|Q5SX79|SHRM1_MOUSE Protein Shroom1 OS=Mus musculus OX=10090 GN=Shroom1 PE=1 SV=2	89.9	2	2.2	11.565	11.8939	12.0136	12.1217		11.9613	11.4143	11.8656	12.3513	12.168			11.6266	11.5201	11.7176	11.889	11.7679	11.975	11.4252	11.1258		11.2972	11.5246			9.99334	10.3281	10.4364	10.5513		10.3899	9.84808	10.3023	10.7846	10.6057			10.067	9.9479	10.1588	10.3471	10.2159
Q9QXE0	Q9QXE0	Hacl1	2-hydroxyacyl-CoA lyase 1	sp|Q9QXE0|HACL1_MOUSE 2-hydroxyacyl-CoA lyase 1 OS=Mus musculus OX=10090 GN=Hacl1 PE=1 SV=2	63.62	2	5.7	12.7442	12.949	13.1515	12.8227	12.5724	13.0073	12.8917	13.0232	13.2107	13.0819	12.3625	12.0005	12.8766	12.8461	13.0078	12.8463	13.0124	12.9332	11.9328	11.8272	12.7528	12.788	12.5014	12.3573	12.9285	11.7892	11.9999	12.1911	11.8689	11.6142	12.0527	11.9422	12.0765	12.2607	12.1363	11.4257	11.0863	11.9336	11.8906	12.0656	11.921	12.0771
P97858	P97858	Slc35b1	Solute carrier family 35 member B1	sp|P97858|S35B1_MOUSE Solute carrier family 35 member B1 OS=Mus musculus OX=10090 GN=Slc35b1 PE=1 SV=1	35.86	2	7.1	13.3054	13.5274	14.1814	13.783	14.0215	12.965	13.1386	13.7536	13.8973	14.2553	12.7292	13.1748	13.6199	13.4556	13.4397	13.179	13.4485	13.7727	13.104	13.0968	12.8913	12.3684	13.7382	13.5777	13.9302	14.9354	15.1632	15.8059	15.4142	15.6482	14.5953	14.774	15.392	15.5323	15.8947	14.3774	14.8455	15.2619	15.085	15.0825	14.8387	15.0981
Q5DU31	Q5DU31	Ipcef1	Interactor protein for cytohesin exchange factors 1	sp|Q5DU31|ICEF1_MOUSE Interactor protein for cytohesin exchange factors 1 OS=Mus musculus OX=10090 GN=Ipcef1 PE=1 SV=2	45.78	2	6.7	16.6534	16.7372	16.2739	16.4444	16.3701	16.702	16.4926	16.8814	16.4744	16.8206	16.0041	16.2101	16.2918	16.5804	16.3088	16.4282	16.2805	16.1551	15.973	15.8182	16.7925	16.4404	16.274	16.3112	16.0205	16.6984	16.7882	16.3134	16.4906	16.4119	16.7473	16.543	16.9347	16.5244	16.875	16.0673	16.2959	16.3489	16.6249	16.3666	16.5029	16.3452
Q8CFE4	Q8CFE4	Scyl2	SCY1-like protein 2	sp|Q8CFE4|SCYL2_MOUSE SCY1-like protein 2 OS=Mus musculus OX=10090 GN=Scyl2 PE=1 SV=1	103.25	12	16.3	15.5454	15.7844	16.0442	15.9803	15.867	16.0248	15.8975	15.9418	16.1942	16.0882	15.2036	15.0914	15.848	16.2645	15.977	15.211	15.4181	15.4917	15.5755	15.4994	16.2355	15.6542	16.3094	16.091	15.8349	14.1397	14.3847	14.6331	14.5758	14.4581	14.6194	14.4973	14.5445	14.7936	14.692	13.8161	13.7266	14.4544	14.8583	14.5841	13.835	14.0321
Q91VX9	Q91VX9	Tmem168	Transmembrane protein 168	sp|Q91VX9|TM168_MOUSE Transmembrane protein 168 OS=Mus musculus OX=10090 GN=Tmem168 PE=1 SV=1	79.62	2	5.9	13.0739	13.0419	13.8486	13.5585	13.3275	13.2476	13.1691	13.6856	13.6686	13.7002	12.7955	12.0458	13.4222	13.0185	13.5618	13.5717	12.934	13.5733	12.9518	12.6672	13.4381	13.5797	13.9401	13.5377	13.705	12.4409	12.4147	13.2101	12.9267	12.6912	12.6149	12.5415	13.0609	13.0406	13.0765	12.1807	11.4535	12.8012	12.3849	12.9416	12.9684	12.3206
Q8CHP6	Q8CHP6	Phc3	Polyhomeotic-like protein 3	sp|Q8CHP6|PHC3_MOUSE Polyhomeotic-like protein 3 OS=Mus musculus OX=10090 GN=Phc3 PE=1 SV=2	105.29	3	3.5	13.6164	13.654	13.5807	13.8522	13.4052	13.3005	13.486	13.8494	13.8607	13.8474	12.6112	13.2761	13.5004	13.5065	13.6179	13.3598	13.3261	13.4562	13.2653	12.7547	13.5882	13.5687	13.6192	13.6084	13.4203	12.8134	12.8569	12.7722	13.0504	12.599	12.4978	12.6885	13.0547	13.0627	13.0538	11.8264	12.5139	12.7095	12.703	12.8277	12.5865	12.5428
Q9CZX9	Q9CZX9	Emc4	ER membrane protein complex subunit 4	sp|Q9CZX9|EMC4_MOUSE ER membrane protein complex subunit 4 OS=Mus musculus OX=10090 GN=Emc4 PE=1 SV=1	20.1	2	13.7	16.6767	16.4984	16.7469	16.9681	16.3874	16.4917	16.6353	17.1364	16.9683	16.9166	16.0862	16.3571	16.4104	16.8875	16.5819	16.5862	16.3644	16.1784	16.0576	16.1466	16.6081	16.6569	16.6038	16.8227	16.8977	17.1692	16.9968	17.2338	17.4618	16.8767	16.9844	17.1333	17.6373	17.4658	17.4185	16.5969	16.8904	16.9149	17.3795	17.0872	17.1084	16.8766
Q8BQ46	Q8BQ46	Taf15	TAF15 RNA polymerase II, TATA box binding protein (TBP)-associated factor	tr|Q8BQ46|Q8BQ46_MOUSE TAF15 RNA polymerase II, TATA box binding protein (TBP)-associated factor OS=Mus musculus OX=10090 GN=Taf15 PE=1 SV=1	58.57	3	6.1	14.2619	14.3536	14.6767	14.6407	14.4978	14.3486	14.1531	14.5817	14.6657	14.8287	13.6076	13.3944	14.4518	14.5639	14.2963	14.4854	14.1076	14.4905	14.0725	13.7712	14.482	14.5747	14.6936	14.6891	14.8313	13.4589	13.5565	13.8682	13.839	13.6916	13.546	13.3556	13.7871	13.8677	14.0351	12.8229	12.6322	13.6608	13.7604	13.5061	13.7121	13.3243
Q99KN2	Q99KN2	Ciao1	Probable cytosolic iron-sulfur protein assembly protein CIAO1	sp|Q99KN2|CIAO1_MOUSE Probable cytosolic iron-sulfur protein assembly protein CIAO1 OS=Mus musculus OX=10090 GN=Ciao1 PE=1 SV=1	37.61	2	8.8	15.8897	15.7885	15.9652	16.0544	15.8472	15.7102	15.512	16.0399	16.0138	16.1313	15.1131	15.3137	15.8667	15.9769	15.5964	15.4476	15.5005	15.6061	15.4473	15.3208	15.5035	15.6492	15.7591	15.9526	15.7208	15.7542	15.6589	15.8241	15.92	15.7084	15.5749	15.3819	15.9127	15.8833	16.0051	14.9958	15.2189	15.7432	15.8408	15.4736	15.3418	15.3846
Q6TYB5	Q6TYB5	Fez2	Fasciculation and elongation protein zeta-2	sp|Q6TYB5|FEZ2_MOUSE Fasciculation and elongation protein zeta-2 OS=Mus musculus OX=10090 GN=Fez2 PE=2 SV=1	39.08	2	7.2	12.928	13.0471	13.3548	13.3687	13.2732	12.7755	12.1408	13.0414	13.7319	13.4838	12.4025	11.8499	13.0816	13.0613	13.0463	12.5342	12.7492	12.3995	13.0688	13.1892	12.856	12.9858	13.2384	13.1844	12.5957	13.0725	13.1975	13.4938	13.5144	13.4145	12.9204	12.2908	13.1943	13.8815	13.6377	12.5653	12.0352	13.2382	13.2053	13.2036	12.7085	12.9134
Q922B6	Q922B6	Traf7	E3 ubiquitin-protein ligase TRAF7	sp|Q922B6|TRAF7_MOUSE E3 ubiquitin-protein ligase TRAF7 OS=Mus musculus OX=10090 GN=Traf7 PE=1 SV=1	66.44	3	4.5	12.5126	12.8374	13.4767	13.3202	13.089	12.5683	12.5319	13.2871	13.238	12.9163	11.7414	12.3668	13.108	12.9606	12.9594	12.3836	12.4655	12.9506	12.4194	12.66	12.7948	12.7467	13.1759	13.1189	13.2168	11.3353	11.6659	12.2938	12.144	11.9084	11.3913	11.36	12.1181	12.0657	11.7483	10.5823	11.2302	11.9427	11.7827	11.7948	11.2359	11.3078
Q8BLS7	Q8BLS7	Sowaha	Ankyrin repeat domain-containing protein SOWAHA	sp|Q8BLS7|SWAHA_MOUSE Ankyrin repeat domain-containing protein SOWAHA OS=Mus musculus OX=10090 GN=Sowaha PE=1 SV=2	57.71	5	14.6	13.0796	13.4939	13.4443	13.5358	13.4026	13.4058	13.4532	13.5992	13.5335	13.601	12.7458	12.6892	13.412	13.4295	13.5642	13.2132	12.91	13.016	13.0473	12.7708	13.4257	13.0913	13.3737	13.2942	13.3052	12.508	12.9282	12.8672	12.9654	12.8277	12.8344	12.887	13.0359	12.9669	13.0387	12.1924	12.1583	12.8524	12.8574	13.0053	12.6712	12.358
Q3TAS6	Q3TAS6	Emc10	ER membrane protein complex subunit 10	sp|Q3TAS6|EMC10_MOUSE ER membrane protein complex subunit 10 OS=Mus musculus OX=10090 GN=Emc10 PE=2 SV=2	27.04	4	16.3	13.5849	13.6227	13.5115	13.9191	13.6734	13.2047	13.3508	13.6219	13.8617	14.0069	12.6548	12.5378	13.3048	13.8512	13.8805	13.3933	13.3362	13.8347	12.9215	12.8996	13.3665	13.4596	13.8811	13.8275	13.8272	14.2149	14.2586	14.136	14.5502	14.3002	13.8349	13.9862	14.2602	14.4967	14.6463	13.303	13.2085	13.9468	14.4806	14.5233	14.053	13.9858
Q6X893	Q6X893	Slc44a1	Choline transporter-like protein 1	sp|Q6X893|CTL1_MOUSE Choline transporter-like protein 1 OS=Mus musculus OX=10090 GN=Slc44a1 PE=1 SV=3	73.02	8	13	17.9797	18.444	18.192	18.264	18.3245	18.3139	18.0933	17.9164	18.4698	18.0534	17.3987	17.1767	17.9601	18.0915	18.2	18.4383	18.1017	18.1246	17.3269	17.4903	17.314	17.5869	17.3699	17.7938	17.5506	17.0737	17.5438	17.2805	17.3592	17.4152	17.4081	17.1927	17.0187	17.5687	17.1567	16.5108	16.3114	17.0661	17.1849	17.3068	17.562	17.2153
Q3UDW8	Q3UDW8	Hgsnat	Heparan-alpha-glucosaminide N-acetyltransferase	sp|Q3UDW8|HGNAT_MOUSE Heparan-alpha-glucosaminide N-acetyltransferase OS=Mus musculus OX=10090 GN=Hgsnat PE=1 SV=2	72.46	3	4.7	13.3617	13.8073	14.3338	14.0313	13.4086	13.5313	13.7224	13.955	14.0654	14.1488	12.9886	12.9754	13.6352	13.9925	14.0818	13.4931	13.8005	13.3735	13.3286	12.9548	13.5517	14.0791	13.7686	13.9488	13.5484	12.9213	13.3728	13.8879	13.5921	12.9649	13.0912	13.2874	13.5229	13.63	13.7178	12.5664	12.5758	13.2068	13.5516	13.6542	13.0824	13.3798
O88559	O88559	Men1	Menin	sp|O88559|MEN1_MOUSE Menin OS=Mus musculus OX=10090 GN=Men1 PE=1 SV=2	67.46	4	7.7	12.8406	13.0534	13.2534	13.4456	13.2645	12.9344	12.7544	13.1913	13.0722	13.0465	12.3256	12.3334	12.8997	13.1644	13.0983	12.9562	12.7377	12.767	12.3054	12.5273	13.154	12.7899	13.5922	13.2277	12.9955	11.8856	12.1043	12.293	12.4919	12.3063	11.9797	11.8049	12.2447	12.1222	12.1009	11.3888	11.4192	11.9567	12.2089	12.1561	12.0309	11.8024
P59268	P59268	Zdhhc9	Palmitoyltransferase ZDHHC9	sp|P59268|ZDHC9_MOUSE Palmitoyltransferase ZDHHC9 OS=Mus musculus OX=10090 GN=Zdhhc9 PE=2 SV=1	40.91	2	6	11.1481	11.7793	11.4838	11.7	11.7212	11.7153	10.728	11.7595	11.416	11.7077	10.7952	10.404	11.3152	11.0992	11.283	11.4505	10.774	11.0922	11.566	11.6388	11.03	11.2566		11.688	11.5119	11.2927	11.9298	11.6228	11.8457	11.8625	11.8601	10.878	11.9124	11.5656	11.8616	10.958	10.5893	11.4718	11.2432	11.4404	11.6247	10.9382
P58021	P58021	Tm9sf2	Transmembrane 9 superfamily member 2	sp|P58021|TM9S2_MOUSE Transmembrane 9 superfamily member 2 OS=Mus musculus OX=10090 GN=Tm9sf2 PE=1 SV=1	75.28	3	7.1	17.2745	17.676	17.5368	17.4932	17.3918	17.4657	17.4426	17.7446	17.4818	17.7415	16.7428	16.4309	17.4118	17.3473	17.5501	17.4721	17.4649	17.5118	16.6615	16.9168	17.416	17.5475	17.6204	17.4054	17.6878	16.9045	17.3119	17.1612	17.1244	17.0186	17.096	17.078	17.383	17.1168	17.3809	16.391	16.1017	17.0538	16.9768	17.1929	17.1318	17.1145
Q9DBS8	Q9DBS8	Poc5	Centrosomal protein POC5	sp|Q9DBS8|POC5_MOUSE Centrosomal protein POC5 OS=Mus musculus OX=10090 GN=Poc5 PE=2 SV=1	60.92	4	7.7	12.8962	12.8767	13.345	12.8244	12.9501	12.8915	12.7775	12.9523	12.857	12.9431	12.7635	12.4003	12.6496	13.0006	13.0522	13.0609	12.5842		12.7497	12.7893	12.7601	12.6618	12.594	12.9629	12.7581	11.9901	11.9766	12.4335	11.9195	12.0407	11.9857	11.8769	12.0545	11.956	12.0464	11.8756	11.5351	11.7555	12.094	12.1589	12.1845	11.6978
Q62376	Q62376	Snrnp70	U1 small nuclear ribonucleoprotein 70 kDa	sp|Q62376|RU17_MOUSE U1 small nuclear ribonucleoprotein 70 kDa OS=Mus musculus OX=10090 GN=Snrnp70 PE=1 SV=2	51.96	4	11.6	15.8689	15.6983	15.973	16.0116	15.7301	15.7793	15.6799	16.0231	15.9757	16.1931	14.9263	14.8004	15.601	15.8715	16.1383	15.841	15.7126	15.8619	15.1305	15.314	15.9599	16.2006	16.1727	16.2348	16.2055	15.7333	15.5687	15.832	15.8773	15.5913	15.644	15.5499	15.8959	15.8451	16.0669	14.8089	14.7056	15.4775	15.7354	16.0156	15.7352	15.5967
O08785	O08785	Clock	Circadian locomoter output cycles protein kaput	sp|O08785|CLOCK_MOUSE Circadian locomoter output cycles protein kaput OS=Mus musculus OX=10090 GN=Clock PE=1 SV=1	96.33	4	4	12.789	12.9868	13.1796	13.0429	13.0463	12.9225	12.7816	13.2135	13.0001	13.1086	12.071	12.0257	13.0059	12.9105	13.014	13.131	13.0453	12.9751	12.1325	12.0267	13.1527	12.9243	13.0806	12.8148	13.2621	11.9861	12.1897	12.3711	12.2411	12.24	12.1198	11.9841	12.4189	12.2021	12.315	11.2863	11.2635	12.2149	12.107	12.2238	12.3577	12.262
Q6RUT7	Q6RUT7	Uqcc4	Ubiquinol-cytochrome c reductase complex assembly factor 4	sp|Q6RUT7|UQCC4_MOUSE Ubiquinol-cytochrome c reductase complex assembly factor 4 OS=Mus musculus OX=10090 GN=Uqcc4 PE=1 SV=1	15.34	2	25	14.8427	14.6815	14.8179	14.8438	14.6579	14.4906	14.4418	14.6925	15.0554	14.9993	14.2003	14.0214	14.6495	14.7254	14.6128	14.4119	14.1328	14.7315	14.2878	14.0197	14.3397	14.4112	14.5111	14.6313	14.6905	15.6247	15.4694	15.5944	15.627	15.4367	15.2729	15.2293	15.4828	15.8424	15.7907	15.0005	14.8441	15.4435	15.5069	15.4076	15.2236	14.9345
Q60700	Q60700	Map3k12	Mitogen-activated protein kinase kinase kinase 12	sp|Q60700|M3K12_MOUSE Mitogen-activated protein kinase kinase kinase 12 OS=Mus musculus OX=10090 GN=Map3k12 PE=1 SV=1	96.02	6	7.3	12.3808	12.3226	12.2	12.1382	12.3019	12.0396	12.4673	12.6149	12.4193	12.5066	11.8818	11.5764	12.1559	12.1848	12.1543	12.2604	11.9246	12.386	11.788	11.3574	12.0801	12.359	12.2084	12.7267	11.9891	11.2034	11.1511	11.0171	10.9621	11.1212	10.8625	11.2954	11.4459	11.247	11.3386	10.7226	10.4398	10.9906	11.007	10.9897	11.1128	10.7669
O55236	O55236	Rngtt	mRNA-capping enzyme	sp|O55236|MCE1_MOUSE mRNA-capping enzyme OS=Mus musculus OX=10090 GN=Rngtt PE=1 SV=1	68.64	3	5.9	12.6449	12.7106	12.7446	12.9964	12.7235	12.5253	12.6268	12.9359	13.0974	13.1754	10.8495	12.6271	12.6637	12.8183	12.8266	12.8327	12.9285	12.9563	12.1044	11.8535	12.5908	12.8016	13.0302	12.5893	12.9216	11.6899	11.7615	11.7841	12.0427	11.7653	11.5706	11.6773	11.9893	12.1475	12.2298	9.91277	11.7129	11.7208	11.8628	11.8844	11.9075	11.9932
Q91Z49	Q91Z49	Fyttd1	UAP56-interacting factor	sp|Q91Z49|UIF_MOUSE UAP56-interacting factor OS=Mus musculus OX=10090 GN=Fyttd1 PE=1 SV=1	35.87	2	8.2	14.0064	13.8365	14.1708	14.2604	13.7918	14.0013	13.95	14.3203	14.1101	14.0725	13.1966	13.5042	14.0271	14.1377	14.0182	13.4902	13.5918	13.3514	13.9019	13.5817	14.9153	14.8219	14.5119	14.4851	14.4638	14.0514	13.8874	14.2103	14.3066	13.8336	14.0466	14.0005	14.3736	14.1601	14.1269	13.2599	13.59	14.0841	14.1822	14.076	13.565	13.6565
Q3THK3	Q3THK3	Gtf2f1	General transcription factor IIF subunit 1	sp|Q3THK3|T2FA_MOUSE General transcription factor IIF subunit 1 OS=Mus musculus OX=10090 GN=Gtf2f1 PE=1 SV=2	57.21	4	9.3	12.3557	12.7261	13.0794	13.0839	12.6482	12.5571	12.4251	12.8705	13.1789	12.8115	11.2485	11.7934	12.8292	12.8756	12.9152	12.6915	12.1093	12.7961	12.008	12.7547	12.6822	12.9168	12.9635	13.159	13.0654	12.0597	12.436	12.7779	12.7891	12.349	12.2614	12.1346	12.5829	12.8879	12.5248	10.9707	11.5381	12.5452	12.5791	12.632	12.4252	11.8329
Q8CGC6	Q8CGC6	Rbm28	RNA-binding protein 28	sp|Q8CGC6|RBM28_MOUSE RNA-binding protein 28 OS=Mus musculus OX=10090 GN=Rbm28 PE=1 SV=4	84.16	4	5.2	15.9948	16.0982	16.4508	16.3713	16.2071	16.1577	15.9029	16.5937	16.3639	16.3224	15.6607	15.3202	16.1561	16.4916	16.2564	15.9548	15.5604	15.3021	16.0321	16.0206	16.5573	16.371	16.2515	16.4592	16.1915	14.8592	14.9686	15.3098	15.237	15.0682	15.0224	14.7728	15.4665	15.2334	15.1962	14.5433	14.2254	15.0326	15.3556	15.1336	14.8489	14.4445
Q9CXE2	Q9CXE2	Bcl7a	B-cell CLL/lymphoma 7 protein family member A	sp|Q9CXE2|BCL7A_MOUSE B-cell CLL/lymphoma 7 protein family member A OS=Mus musculus OX=10090 GN=Bcl7a PE=2 SV=1	22.77	2	17.6	13.217	13.4902	13.7144	13.9557	14.0631	13.1728	13.2121	13.5618	13.6918	13.8854	12.7913	12.7892	13.4733	13.4453	13.6591	13.1606	12.9759	13.4115	13.6391	12.9146	13.1355	13.0321	13.5298	13.3354	13.4942	14.1689	14.448	14.6608	14.9088	15.0118	14.1251	14.1695	14.5221	14.6487	14.8467	13.7614	13.7819	14.4373	14.3967	14.6239	14.1422	13.9475
Q8BK75	Q8BK75	Elp6	Elongator complex protein 6	sp|Q8BK75|ELP6_MOUSE Elongator complex protein 6 OS=Mus musculus OX=10090 GN=Elp6 PE=1 SV=1	29.31	2	7.1	13.9761	14.133	14.1454	14.0942	14.0094	13.8517	13.7046	14.3294	14.0146	14.0678	13.6082	13.4295	14.0241	13.9221	14.0747	13.4454	13.9252	13.376	13.4623	13.3605	13.8549	13.6753	13.5612	13.8237	13.6206	13.928	14.0908	14.0918	14.0473	13.9581	13.8039	13.6619	14.2897	13.9715	14.0291	13.5784	13.4222	13.9881	13.8735	14.0394	13.427	13.8968
Q6A051	Q6A051	Atrnl1	Attractin-like protein 1	sp|Q6A051|ATRN1_MOUSE Attractin-like protein 1 OS=Mus musculus OX=10090 GN=Atrnl1 PE=1 SV=2	152.37	4	4.1	13.7292	13.6813	13.7134	13.413		13.5068	13.6528	13.6703	13.7038	13.7526	13.0479	13.2746	13.3786	13.661	13.5866		13.7309	13.194	13.2214	13.2171	13.4912	13.4595	13.597	13.4732	13.526	11.9807	11.9387	11.9594	11.6656		11.7586	11.9098	11.9301	11.9603	12.0135	11.3176	11.5669	11.6421	11.912	11.8509		12.002
Q8R2K4	Q8R2K4	Taf6l	TAF6-like RNA polymerase II p300/CBP-associated factor-associated factor 65 kDa subunit 6L	sp|Q8R2K4|TAF6L_MOUSE TAF6-like RNA polymerase II p300/CBP-associated factor-associated factor 65 kDa subunit 6L OS=Mus musculus OX=10090 GN=Taf6l PE=1 SV=1	67.19	5	8.4	12.5905	12.8307		12.78	12.7511	12.4722	12.4495	12.7975	13.1437	12.9705	11.9048	12.449	12.6612		12.7384	12.3467	12.7868	12.5194	12.1856	11.6975	12.6051	12.5739	12.9091	12.9136	12.6887	11.7876	12.0336		11.9782	11.9449	11.6695	11.652	12.0029	12.3457	12.1769	11.12	11.6868	11.8702		11.9483	11.5735	12.0035
Q6PCN3	Q6PCN3	Ttbk1	Tau-tubulin kinase 1	sp|Q6PCN3|TTBK1_MOUSE Tau-tubulin kinase 1 OS=Mus musculus OX=10090 GN=Ttbk1 PE=1 SV=3	141.53	11	9.4	14.651	14.5768	14.7826	15.0576	14.8751	14.8318	14.7906	14.8499	15.0946	14.8568	14.2983	13.7372	14.5873	14.9712	14.7709	14.3	14.5369	14.3178	14.7046	14.4578	14.985	14.7671	15.0527	14.9868	14.4647	12.5806	12.5123	12.7067	12.9883	12.8014	12.7617	12.7256	12.7878	13.0291	12.7957	12.246	11.7076	12.5289	12.9002	12.7132	12.2592	12.4861
Q61211	Q61211	Eif2d	Eukaryotic translation initiation factor 2D	sp|Q61211|EIF2D_MOUSE Eukaryotic translation initiation factor 2D OS=Mus musculus OX=10090 GN=Eif2d PE=1 SV=3	62.79	5	10	12.1742	12.1141	12.3344	12.0879		12.0489	11.9327	12.1059	12.4183	12.5111	12.337		11.925	12.2451	12.1718	11.664	12.1446	12.3177	12.0678		11.8531	11.958	11.8068	12.018	11.9698	11.1719	11.1177	11.3266	11.0868		11.047	10.9359	11.112	11.4211	11.5182	11.353		10.9348	11.2423	11.1823	10.6914	11.1619
Q3UBX0	Q3UBX0	Tmem109	Voltage-gated monoatomic cation channel TMEM109	sp|Q3UBX0|TM109_MOUSE Voltage-gated monoatomic cation channel TMEM109 OS=Mus musculus OX=10090 GN=Tmem109 PE=1 SV=2	26.29	3	9.1	17.8423	17.8687	18.347	17.9741	17.7577	17.8045	17.7842	18.1652	18.4197	18.0873	17.2393	17.2404	17.754	17.9577	17.7937	17.7632	17.8715	18.0367	17.4256	17.2892	17.9391	18.0422	18.0858	17.8889	18.2388	18.7942	18.8266	19.2934	18.9272	18.7064	18.7567	18.7415	19.1254	19.3766	19.0486	18.2094	18.2331	18.7179	18.9091	18.7584	18.7448	18.8431
Q64707	Q64707	Zrsr2-ps1	U2 small nuclear ribonucleoprotein auxiliary factor 35 kDa subunit-related protein 2-like	sp|Q64707|U2AFL_MOUSE U2 small nuclear ribonucleoprotein auxiliary factor 35 kDa subunit-related protein 2-like OS=Mus musculus OX=10090 GN=Zrsr2-ps1 PE=1 SV=1	51.33	2	4	11.6542	12.1748	12.1427	12.2576	12.0609	11.4203	11.6201	12.2202	11.9117	12.4672	11.242	10.5866	11.8352	12.0831	12.4357	11.6117	11.5335	11.5025	11.7335	11.6878	11.7184	11.7834	11.9416	11.8535	11.9124	11.3582	11.8847	11.8412	11.9627	11.7616	11.1246	11.3295	11.9325	11.6207	12.1806	10.9642	10.3314	11.5512	11.7866	12.1524	11.3454	11.2572
Q9D198	Q9D198	Syf2	Pre-mRNA-splicing factor SYF2	sp|Q9D198|SYF2_MOUSE Pre-mRNA-splicing factor SYF2 OS=Mus musculus OX=10090 GN=Syf2 PE=2 SV=1	28.69	2	9.1	13.5661	13.8523	13.8194	13.8623	13.6389	13.7401	13.0065	13.7064	13.857	13.7802	12.7545	12.3222	13.6232	13.776	13.7498	13.7875	13.7776	13.3284	13.0786	12.9567	12.9535	13.5528	13.701	13.8145	13.5965	14.0586	14.3507	14.3064	14.3559	14.1281	14.2329	13.5045	14.2072	14.3544	14.282	13.2652	12.8555	14.1277	14.268	14.2551	14.3097	14.2897
Q6P5B0	Q6P5B0	Rrp12	RRP12-like protein	sp|Q6P5B0|RRP12_MOUSE RRP12-like protein OS=Mus musculus OX=10090 GN=Rrp12 PE=1 SV=1	143.04	5	4.2	12.6462	12.9324	13.474	13.6674	13.5258	13.3424	12.9904	13.4177	13.6921	13.7523	12.5604	12.2978	13.2227	13.7963	13.4795	12.6658	12.4079	12.8101	13.3566	13.1695	13.5416	13.4462	13.7751	13.6426	13.3141	10.5106	10.8028	11.333	11.533	11.387	11.2072	10.8604	11.2905	11.5615	11.6261	10.4431	10.2031	11.0992	11.6602	11.3567	10.5599	10.292
Q8WUR0	Q8WUR0		Protein C19orf12 homolog	sp|Q8WUR0|CS012_MOUSE Protein C19orf12 homolog OS=Mus musculus OX=10090 PE=1 SV=1	15.08	4	21.3	14.6506	14.8726	14.6146	14.8531	14.4207	14.6141	14.5103	14.7888	14.9451	14.8165	13.9717	13.7678	14.2646	14.7336	14.4951	14.4384	14.6941	14.6702	14.5657	13.8173	14.4701	14.5642	14.737	14.8387	14.8015	16.2805	16.5085	16.2391	16.4842	16.0475	16.2444	16.1457	16.4271	16.5801	16.4559	15.6199	15.4386	15.9066	16.3631	16.1379	16.098	16.3438
Q8JZM7	Q8JZM7	Cdc73	Parafibromin	sp|Q8JZM7|CDC73_MOUSE Parafibromin OS=Mus musculus OX=10090 GN=Cdc73 PE=1 SV=1	60.54	4	7.3	13.9072	13.8818	13.9261	13.9046	13.6683	13.5875	13.6644	14.1101	13.8719	14.1564	13.1972	13.2094	13.8536	13.7322	13.8409	13.9203	13.9371	13.6176	12.8047	12.9039	13.8217	13.9536	13.9048	13.8393	13.9129	12.8147	12.7952	12.8281	12.8133	12.5726	12.4954	12.5774	13.026	12.7844	13.0733	12.123	12.1577	12.7731	12.6392	12.7612	12.8576	12.8643
Q9WV76	Q9WV76	Ap4b1	AP-4 complex subunit beta-1	sp|Q9WV76|AP4B1_MOUSE AP-4 complex subunit beta-1 OS=Mus musculus OX=10090 GN=Ap4b1 PE=1 SV=2	82.92	3	4.5	12.138	12.2024	12.5314	12.3323	12.3216	12.1128	11.9766	12.4725	12.2415	12.6732	11.7191	12.1722	12.2115	12.2466	12.4649		12.1658	12.5658	12.4149	11.9626	12.386	11.5609	12.3309	12.2855	12.7349	10.5353	10.6056	10.9232	10.7308	10.7157	10.5104	10.3794	10.8782	10.6438	11.0799	10.1347	10.6103	10.6209	10.6434	10.875		10.5827
Q80U22	Q80U22	Rusc2	AP-4 complex accessory subunit RUSC2	sp|Q80U22|RUSC2_MOUSE AP-4 complex accessory subunit RUSC2 OS=Mus musculus OX=10090 GN=Rusc2 PE=1 SV=2	161.04	3	2.8	21.5768	21.376	21.6689	21.4938	21.661	21.3281	21.2666	21.6302	21.6973	21.9318	21.441	21.4151	20.9294	21.5786	21.4318	21.3936	21.4838	21.2956	21.4799	19.5284	21.5396	21.5697	21.5646	21.6369	21.5873	19.7213	19.5265	19.808	19.6395	19.8023	19.473	19.4166	19.7831	19.8469	20.0857	19.6038	19.6004	19.086	19.7227	19.5891	19.5679	19.648
Q8C4B4	Q8C4B4	Unc119b	Protein unc-119 homolog B	sp|Q8C4B4|U119B_MOUSE Protein unc-119 homolog B OS=Mus musculus OX=10090 GN=Unc119b PE=1 SV=1	28.29	3	16.7	15.067	15.1736	15.2081	15.2201	15.292	14.9009	14.9792	15.2267	15.4501	14.9839	15.0238	14.9271	14.8993	15.1539	14.3307	14.5997	14.9111	14.8556	14.2085	14.9422	14.7725	15.1024	15.0805	15.1104	15.2251	15.112	15.2246	15.2477	15.2663	15.3337	14.9463	15.0297	15.2801	15.5002	15.0383	15.0871	15.0128	14.9564	15.1984	14.3885	14.6744	14.9758
Q99N91	Q99N91	Mrpl34	Large ribosomal subunit protein bL34m	sp|Q99N91|RM34_MOUSE Large ribosomal subunit protein bL34m OS=Mus musculus OX=10090 GN=Mrpl34 PE=1 SV=1	10.52	2	23.9	14.5633	14.5045	14.4195	14.7189	14.6355	14.4747	14.3314	14.6457	14.6439	15.0451	13.872	13.7123	14.2316	14.6944	14.8383	14.5335	14.4723	14.1998	13.9411	13.8398	14.7458	14.4495	14.5614	14.6886	14.6567	16.1933	16.1404	16.044	16.3501	16.2623	16.105	15.9668	16.284	16.2789	16.6844	15.5202	15.3831	15.8736	16.3238	16.4811	16.1932	16.122
Q80X80	Q80X80	C2cd2l	Phospholipid transfer protein C2CD2L	sp|Q80X80|C2C2L_MOUSE Phospholipid transfer protein C2CD2L OS=Mus musculus OX=10090 GN=C2cd2l PE=1 SV=3	76.28	8	14.7	16.7719	17.0131	17.0073	17.0898	17.0004	17.0057	16.8128	17.1049	17.1903	17.4246	15.8713	16.2221	16.8084	17.1065	17.1746	16.8219	16.8972	16.9352	16.3412	16.596	17.2549	16.8888	17.304	17.1559	17.0734	15.9164	16.1635	16.1464	16.2356	16.1417	16.1506	15.9629	16.2578	16.3398	16.5785	15.034	15.4075	15.965	16.2506	16.332	15.9962	16.0614
Q923B1	Q923B1	Dbr1	Lariat debranching enzyme	sp|Q923B1|DBR1_MOUSE Lariat debranching enzyme OS=Mus musculus OX=10090 GN=Dbr1 PE=1 SV=2	62.25	4	8	13.7499	13.948	14.0543	14.0221	14.115	13.8099	13.9855	14.1297	14.3724	14.3432		13.8384	14.0125	14.111	14.3238	13.8835	13.8554	14.0819	13.8474	13.9287	13.6649	14.077	14.1048	14.1618	14.3116	13.3095	13.5135	13.6084	13.5829	13.6713	13.3698	13.5506	13.6976	13.937	13.9122		13.4387	13.5841	13.6701	13.8962	13.4729	13.4347
E9Q6Y8	E9Q6Y8	Usp31	ubiquitinyl hydrolase 1	tr|E9Q6Y8|E9Q6Y8_MOUSE ubiquitinyl hydrolase 1 OS=Mus musculus OX=10090 GN=Usp31 PE=1 SV=1	146.23	7	6.7	14.0199	14.3767	14.2899	14.5232	14.4155	14.3152	13.9423	14.2986	14.4939	14.5762	13.7763	13.3437	14.0286	14.2315	14.301	13.9694	13.9875	13.8253	14.1089	14.0362	14.3046	14.1028	14.4365	14.3644	14.0278	11.9057	12.2684	12.1703	12.4103	12.2981	12.2014	11.8336	12.1928	12.3847	12.4714	11.6803	11.2703	11.9265	12.1168	12.1996	11.885	11.893
Q9D938	Q9D938	Tmem160	Transmembrane protein 160	sp|Q9D938|TM160_MOUSE Transmembrane protein 160 OS=Mus musculus OX=10090 GN=Tmem160 PE=2 SV=1	19.57	3	18.1	15.9814	16.099	16.2213	16.0383	15.9433	16.1315	16.0877	16.3596	16.4077	16.0262	15.347	15.3379	15.9368	16.1098	16.1907	16.317	15.8007	16.0489	15.3377	15.2317	16.0047	15.9898	15.9944	15.9802	15.9593	16.9333	17.0568	17.1677	16.9914	16.892	17.0837	17.045	17.3199	17.3646	16.9875	16.3171	16.3306	16.9008	17.0612	17.1554	17.2986	16.7723
Q8CH02	Q8CH02	Sugp1	SURP and G-patch domain-containing protein 1	sp|Q8CH02|SUGP1_MOUSE SURP and G-patch domain-containing protein 1 OS=Mus musculus OX=10090 GN=Sugp1 PE=1 SV=1	72.6	4	11.5	13.8437	13.1242	13.456	13.1218	13.2699	13.1607	12.8271	13.5245	13.5581	13.2763	12.6278	12.782	13.1951	13.2815	13.7678	12.6627	12.8494	12.5546	13.136	12.6694	13.4858	13.3576	13.1317	13.1998	12.7074	12.7082	11.9946	12.3149	11.9874	12.131	12.0254	11.697	12.3973	12.4275	12.1501	11.5105	11.6872	12.0715	12.1454	12.6451	11.5568	11.7335
Q921I2	Q921I2	Klhdc4	Kelch domain-containing protein 4	sp|Q921I2|KLDC4_MOUSE Kelch domain-containing protein 4 OS=Mus musculus OX=10090 GN=Klhdc4 PE=2 SV=2	64.82	2	3.9	10.1765	10.2353	11.4383	10.9138	10.7136	10.1303	10.2326	11.07	10.9469	10.6432	10.5874	10.1153	10.9206	10.6553		10.3851		10.8634	10.5813	10.5424	10.9519		11.3669	10.9433	10.3571	9.17416	9.23893	10.4305	9.9127	9.7081	9.1283	9.23575	10.0761	9.94961	9.65034	9.6033	9.1538	9.93035	9.65254		9.4125
P97376	P97376	Frg1	Protein FRG1	sp|P97376|FRG1_MOUSE Protein FRG1 OS=Mus musculus OX=10090 GN=Frg1 PE=1 SV=2	29.11	4	19.8	14.0741	14.1973	14.4871	14.5788	14.0909	14.3552	13.8218	14.4721	14.4891	14.6565	13.4467	13.0337	14.2481	14.4482	14.3256	14.149	14.0465	14.0658	14.1344	13.7169	14.1889	14.1203	14.3263	14.6187	14.4123	14.3255	14.4547	14.7331	14.8315	14.3392	14.607	14.0788	14.7319	14.7456	14.9174	13.7164	13.326	14.5116	14.6992	14.5899	14.4302	14.3177
Q9D0M0	Q9D0M0	Exosc7	Exosome complex exonuclease RRP42	sp|Q9D0M0|EXOS7_MOUSE Exosome complex exonuclease RRP42 OS=Mus musculus OX=10090 GN=Exosc7 PE=1 SV=2	31.81	3	13.4	12.8261	12.9593	12.7109	13.0482	12.8275	12.769	12.8476	13.1729	12.8303	12.7831	12.3407	11.9539	12.2937	12.8653	12.8237	12.7018	12.3135	12.762	12.614	12.5018	12.6894	13.031	13.0324	12.789	12.5797	12.6081	12.7472	12.4874	12.8314	12.6062	12.5513	12.6351	12.9632	12.6173	12.5745	12.1409	11.7767	12.0877	12.6468	12.6185	12.5135	12.1152
A2A654	A2A654	Bptf	Bromodomain PHD finger transcription factor	tr|A2A654|A2A654_MOUSE Bromodomain PHD finger transcription factor OS=Mus musculus OX=10090 GN=Bptf PE=1 SV=1	333.02	11	5.1	14.576	14.9593	14.9969	15.1177	14.961	15.02	14.804	15.0158	15.3114	15.2539	14.3126	14.3541	14.9075	14.9586	15.1597	14.5138	14.5637	14.4991	14.8388	14.3043	15.044	15.0714	15.2794	14.9714	14.6413	11.3883	11.7776	11.8037	11.9312	11.7701	11.8327	11.6218	11.8365	12.1288	12.0757	11.1431	11.2072	11.7319	11.7704	11.9848	11.3559	11.3957
Q9JIN6	Q9JIN6	Kcnmb4	Calcium-activated potassium channel subunit beta-4	sp|Q9JIN6|KCMB4_MOUSE Calcium-activated potassium channel subunit beta-4 OS=Mus musculus OX=10090 GN=Kcnmb4 PE=1 SV=1	23.84	2	12.4	13.1572	13.6916	13.3541	12.6823	12.7594	13.6026	12.8387	13.4912	13.2264	13.4439	13.1091	12.9804	12.9372	12.454	13.5012	12.5366	13.1032	13.1435	12.6861	12.1966	13.24	11.6646	12.6349	12.0199	12.57	14.3017	14.8421	14.4931	13.828	13.9007	14.7475	13.9887	14.6441	14.376	14.5979	14.2719	14.1658	14.0938	13.598	14.6586	13.7109	14.2674
G3UW60	G3UW60	Susd5	Sushi domain containing 5	tr|G3UW60|G3UW60_MOUSE Sushi domain containing 5 OS=Mus musculus OX=10090 GN=Susd5 PE=1 SV=1	66.76	2	3.1	10.7577	10.7736	10.945	11.3558		11.0782	10.1313	11.2236	10.4057	11.594			10.6063		11.1293	11.262		10.8848	11.4914		11.5122	10.708		11.328		9.85167	9.87343	10.0334	10.4509		10.1724	9.23071	10.3259	9.50462	10.6973			9.71224		10.236	10.3856
Q91WE2	Q91WE2	Psme3ip1	PSME3-interacting protein	sp|Q91WE2|PIP30_MOUSE PSME3-interacting protein OS=Mus musculus OX=10090 GN=Psme3ip1 PE=1 SV=1	28.68	4	15.7	14.9185	14.8234	14.9428	14.9722	14.7722	15.0753	14.8051	15.2766	15.1504	15.3638	14.1555	14.15	14.843	14.8432	14.9626	14.8653	14.7737	14.9966	14.5345	14.3815	15.0331	14.9165	15.077	14.8561	15.1839	15.17	15.0808	15.1888	15.2249	15.0204	15.3271	15.0621	15.5364	15.4069	15.6246	14.4252	14.4422	15.1065	15.0941	15.2269	15.1465	15.0449
Q9CY97	Q9CY97	Ssu72	RNA polymerase II subunit A C-terminal domain phosphatase SSU72	sp|Q9CY97|SSU72_MOUSE RNA polymerase II subunit A C-terminal domain phosphatase SSU72 OS=Mus musculus OX=10090 GN=Ssu72 PE=1 SV=1	22.5	5	29.9	14.8826	14.9397	14.928	14.9334	14.7099	14.7635	14.9999	15.1694	15.0949	15.0095	14.1407	14.2194	14.8707	14.9882	15.1619	14.8388	14.4865	14.9156	14.1322	14.0824	14.9834	14.9132	14.868	14.992	14.7874	15.3751	15.4381	15.415	15.4271	15.1992	15.2563	15.4979	15.6703	15.5924	15.5113	14.6514	14.7527	15.3753	15.4801	15.6672	15.361	14.9987
Q3TMX7	Q3TMX7	Qsox2	Sulfhydryl oxidase 2	sp|Q3TMX7|QSOX2_MOUSE Sulfhydryl oxidase 2 OS=Mus musculus OX=10090 GN=Qsox2 PE=1 SV=1	77.73	2	2.9	13.0462	13.078	13.5542	13.1996	12.9778	12.7337	12.4942	13.2077	13.1859	13.673	12.2963	12.2281	12.7331	13.1718	13.1541	12.9362	12.195	12.9334	12.8376	13.0796	12.9974	12.0077	13.31	13.2198	13.3488	11.8688	11.9066	12.3713	12.0235	11.7972	11.5566	11.3223	12.0387	12.0135	12.505	11.1371	11.0915	11.5678	11.9939	11.9895	11.7885	11.0373
Q9QUN9	Q9QUN9	Dkk3	Dickkopf-related protein 3	sp|Q9QUN9|DKK3_MOUSE Dickkopf-related protein 3 OS=Mus musculus OX=10090 GN=Dkk3 PE=2 SV=1	38.36	2	7.4	12.9386	12.9216	12.7111	12.8457	13.0253	13.2217	12.6442	13.2754	13.1376	13.1587	12.2061	12.2912	13.0837	12.703	13.0015	12.9346	12.7434	12.832	12.1488	12.3506	12.409	12.5542	12.7217	12.9536	12.9271	12.803	12.7919	12.57	12.7114	12.8865	13.0864	12.5141	13.1482	13.007	13.0325	12.0888	12.1964	12.9602	12.5669	12.8787	12.8288	12.6275
Q5U680	Q5U680	Slc25a26	Mitochondrial S-adenosylmethionine carrier protein	sp|Q5U680|SAMC_MOUSE Mitochondrial S-adenosylmethionine carrier protein OS=Mus musculus OX=10090 GN=Slc25a26 PE=1 SV=2	29.01	2	15		14.4306	14.1409	14.22	13.7508	13.6075	13.5536	13.6205	13.5882	13.9019	13.5989		13.902	13.966	12.6727	13.7914	13.4604	13.9439	13.2334	12.7995	13.3816	13.1969	13.7623		13.838		14.8035	14.5024	14.5882	14.1145	13.9747	13.9261	13.9958	13.9602	14.2783	13.9841		14.281	14.3324	13.0524	14.188	13.847
Q9WU84	Q9WU84	Ccs	Copper chaperone for superoxide dismutase	sp|Q9WU84|CCS_MOUSE Copper chaperone for superoxide dismutase OS=Mus musculus OX=10090 GN=Ccs PE=1 SV=1	28.89	2	8	16.6617	16.8617	16.8343	16.7551	16.8888	16.5978	16.6453	17.0223	16.9171	17.0507	16.1701	16.2337	16.7135	16.8033	16.4701	16.6675	16.7588	16.7978	16.0505	16.0005	16.4665	16.4942	16.6403	16.7062	16.7088	16.9132	17.1191	17.0803	17.0077	17.137	16.8495	16.9022	17.2821	17.1736	17.3115	16.4398	16.526	16.977	17.0542	16.7344	16.9487	17.03
Q64523	Q64523;Q6GSS7	H2ac20	Histone H2A type 2-C	sp|Q64523|H2A2C_MOUSE Histone H2A type 2-C OS=Mus musculus OX=10090 GN=H2ac20 PE=1 SV=3	13.98	2	37.2	12.9367	12.8523	13.2309	13.2898	13.4776	13.449	12.9023	12.6947	13.7116	13.6773	12.495	12.1974	12.8317	13.445	13.3749	12.8994	12.7922	12.248	13.4806	12.8927	13.8859	13.0512	12.679	12.899	12.6249	14.5667	14.4882	14.8554	14.921	15.1044	15.0793	14.5377	14.333	15.3466	15.3167	14.1432	13.8681	14.4737	15.0744	15.0176	14.5591	14.4419
O88974	O88974	Setdb1	Histone-lysine N-methyltransferase SETDB1	sp|O88974|SETB1_MOUSE Histone-lysine N-methyltransferase SETDB1 OS=Mus musculus OX=10090 GN=Setdb1 PE=1 SV=1	144.46	3	2.2	14.3273	13.5032	13.7495	14.1217	13.2745	13.8135	13.1984	13.2708	13.4947	13.6411	12.5537	12.9554	12.8068	14.0571	13.3357	13.6606	13.2372	13.2593	13.9377	13.0319	13.7053	13.2964	13.3671	13.5359	12.9248	12.1918	11.3735	11.6085	11.9874	11.1356	11.6782	11.0683	11.1436	11.3642	11.5149	10.4364	10.8606	10.6833	11.921	11.213	11.5547	11.1213
Q61103	Q61103	Dpf2	Zinc finger protein ubi-d4	sp|Q61103|REQU_MOUSE Zinc finger protein ubi-d4 OS=Mus musculus OX=10090 GN=Dpf2 PE=1 SV=1	44.2	2	6.1	13.5546		14.4948	14.2493	14.0183	13.9313	13.4383	14.0631	14.4547	13.7999	13.227		14.0625	14.4623	14.1701		13.6979	13.7591	14.1592	13.8731	13.8635	13.9282	14.2892	14.1993	14.3629	13.0471		13.9817	13.743	13.5075	13.4241	12.9362	13.564	13.9522	13.3018	12.7377		13.567	13.9543	13.6754		13.2101
Q9CQ48	Q9CQ48	Nudcd2	NudC domain-containing protein 2	sp|Q9CQ48|NUDC2_MOUSE NudC domain-containing protein 2 OS=Mus musculus OX=10090 GN=Nudcd2 PE=1 SV=1	17.65	2	13.4	16.2583	16.0854	16.2648	16.754	16.1715	16.064	16.2682	16.9524	16.8591	16.4317	15.3797	15.9363	15.8499	16.318	16.4852	16.1883	15.9453	16.3915	15.8248	16.241	16.0073	15.764	15.8114	16.3947	16.4652	17.4029	17.2359	17.4039	17.8997	17.3128	17.2088	17.4182	18.1053	18.0087	17.5856	16.5425	17.1217	17.0065	17.4621	17.6426	17.3625	17.1095
E9Q9Q2	E9Q9Q2	R3hdm1	R3H domain containing 1	tr|E9Q9Q2|E9Q9Q2_MOUSE R3H domain containing 1 OS=Mus musculus OX=10090 GN=R3hdm1 PE=1 SV=1	124.31	3	3.6	14.3435	14.5469	14.4159	14.5518	14.2138	14.5694	14.3396	14.7102	14.6056	14.6169	13.4854	13.8295	14.4333	14.2698	14.5544	14.5053	14.5921	14.346	13.894	13.4546	14.4144	14.3487	14.6263	14.5218	14.6679	13.3412	13.5506	13.4082	13.5508	13.2083	13.5674	13.3428	13.7163	13.6083	13.624	12.5013	12.868	13.443	13.267	13.565	13.5327	13.6095
Q9CR59	Q9CR59	Gadd45gip1	Large ribosomal subunit protein mL64	sp|Q9CR59|G45IP_MOUSE Large ribosomal subunit protein mL64 OS=Mus musculus OX=10090 GN=Gadd45gip1 PE=1 SV=1	25.8	2	14	15.0488	15.1388	15.0473	14.7612	14.7915	14.9914	15.0123	15.203	15.1051	15.1428	14.5777	14.9594	14.9015	14.6836	14.9759	14.8343	14.4424	14.6019	14.3071	14.4091	15.0852	13.4657	14.5	14.5798	14.4257	15.4157	15.5117	15.4087	15.1294	15.1552	15.3586	15.3847	15.5783	15.477	15.5191	14.9628	15.3672	15.2805	15.0501	15.3556	15.2309	14.8291
Q61818	Q61818	Rai1	Retinoic acid-induced protein 1	sp|Q61818|RAI1_MOUSE Retinoic acid-induced protein 1 OS=Mus musculus OX=10090 GN=Rai1 PE=1 SV=3	201.45	2	1.1	11.4562	11.8763	11.6147	11.6579	11.2553	11.4145	11.0925	11.5324	11.4142	11.8556			11.5244	11.5031	11.5247	11.1056	11.4348	11.261	11.2459	11.0617	11.5023	11.6819	11.5168	11.2873	11.4741	9.05058	9.4766	9.20354	9.25343	8.84635	9.00921	8.69228	9.13505	9.01359	9.45931			9.13077	9.09699	9.13182	8.72962	9.04884
P97479	P97479	Myo7a	Unconventional myosin-VIIa	sp|P97479|MYO7A_MOUSE Unconventional myosin-VIIa OS=Mus musculus OX=10090 GN=Myo7a PE=1 SV=2	254.78	8	3.5		11.0832	13.1278			11.0021								12.4927	11.802				12.0913		12.4819	12.103	12.6396	11.7922			8.22086	10.254			8.1341								9.62395	8.94654
P58006	P58006	Sesn1	Sestrin-1	sp|P58006|SESN1_MOUSE Sestrin-1 OS=Mus musculus OX=10090 GN=Sesn1 PE=1 SV=3	56.6	3	8.3	12.9805	12.8809	13.1424		12.9827		12.6908	13.1508	12.91	13.4282	12.7328	12.694	12.7547		13.1613		12.6156	12.8431	12.8791	12.8432	12.3549	12.6332	12.6485	12.721	13.0789	12.2885	12.1949	12.445		12.2874		12.0043	12.4671	12.223	12.7456	12.0591	12.0428	12.0748		12.4821		11.9433
Q9CPU4	Q9CPU4	Mgst3	Glutathione S-transferase 3, mitochondrial	sp|Q9CPU4|MGST3_MOUSE Glutathione S-transferase 3, mitochondrial OS=Mus musculus OX=10090 GN=Mgst3 PE=1 SV=1	16.95	6	54.2	18.8229	19.0253	18.8364	18.655	18.6281	18.7855	19.0979	19.4594	18.9487	19.2022	18.0304	18.28	18.6397	18.8828	18.7988	19.2384	18.8387	19.2644	18.12	17.8294	19.3721	18.9994	18.9859	19.4006	19.4421	19.9674	20.1757	19.9754	19.8008	19.7694	19.9304	20.248	20.6123	20.0983	20.3562	19.1932	19.4653	19.7963	20.0268	19.9562	20.4126	20.0029
Q3U0L2	Q3U0L2	Ankrd33b	Ankyrin repeat domain-containing protein 33B	sp|Q3U0L2|AN33B_MOUSE Ankyrin repeat domain-containing protein 33B OS=Mus musculus OX=10090 GN=Ankrd33b PE=1 SV=1	53.17	2	7.8		10.3005	10.2732	10.961			10.4102	11.4573		11.3514			10.8151	10.683	10.8699	10.1985		10.3502	10.4647		11.1387	10.4735	10.8902	10.7259	10.4261		9.93641	9.8977	10.5922			10.0456	11.0956		10.9907			10.4571	10.3125	10.5127	9.85815
Q9D2P4	Q9D2P4	Urm1	Ubiquitin-related modifier 1	sp|Q9D2P4|URM1_MOUSE Ubiquitin-related modifier 1 OS=Mus musculus OX=10090 GN=Urm1 PE=1 SV=1	11.32	3	36.6	14.947	15.1632	14.9742	14.9358	14.985	14.9791	15.177	15.5496	15.547	15.2007	14.6472	14.1872	15.0124	14.8149	15.3126	15.2928	14.5268	15.0618	14.3015	14.7663	15.1868	15.6162	14.7358	15.3032	15.4102	16.5769	16.7991	16.5986	16.567	16.6117	16.6094	16.8124	17.1879	17.182	16.84	16.2954	15.858	16.6544	16.4444	16.9554	16.9525	16.1764
Q8R079	Q8R079	Bfar	Bifunctional apoptosis regulator	sp|Q8R079|BFAR_MOUSE Bifunctional apoptosis regulator OS=Mus musculus OX=10090 GN=Bfar PE=1 SV=1	52.93	2	5.1	12.8751	12.9322	12.8682	12.7017	12.8037	12.5549	12.4069	12.8136	13.0378	13.0378	11.7701	12.218	12.6588	12.6779	12.7491	12.6747	12.6708	12.5337	12.2606	12.2936	12.6328	13.0012	13.02	12.8565	12.7131	12.7395	12.8026	12.7271	12.5674	12.6649	12.4196	12.2768	12.6864	12.9073	12.9116	11.6528	12.1232	12.5353	12.5419	12.6263	12.5688	12.555
P16301	P16301	Lcat	Phosphatidylcholine-sterol acyltransferase	sp|P16301|LCAT_MOUSE Phosphatidylcholine-sterol acyltransferase OS=Mus musculus OX=10090 GN=Lcat PE=1 SV=2	49.72	2	6.8	11.9065	11.955	12.322	11.9888	11.5185	11.6708	11.2624	12.0759	12.2254	11.8512	11.7518	11.3752	12.0956	12.4279	11.6934		11.3823	11.4568	12.0018	12.0132	11.8547	11.7206	11.7244	11.5793	11.7488	11.2735	11.3278	11.6835	11.3569	10.8822	11.038	10.6348	11.4511	11.5973	11.2275	11.137	10.7829	11.4746	11.7943	11.0731		10.7689
Q9JKW0	Q9JKW0	Arl6ip1	ADP-ribosylation factor-like protein 6-interacting protein 1	sp|Q9JKW0|AR6P1_MOUSE ADP-ribosylation factor-like protein 6-interacting protein 1 OS=Mus musculus OX=10090 GN=Arl6ip1 PE=1 SV=1	23.42	2	8.9	16.1169	16.083	16.4151	17.1652	16.0622	15.7461	16.2361	17.1836	16.8824	16.6221	15.6311	15.92	16.0184	16.8228	16.528	16.3119	15.2043	16.682	15.6682	16.2018	15.916	15.8844	16.324	16.6861	16.691	18.0688	18.0408	18.3616	19.1183	18.0109	17.6983	18.1935	19.1439	18.8393	18.5834	17.6012	17.9127	17.9824	18.7742	18.4927	18.2935	17.1759
Q7TN79	Q7TN79	Akap7	A-kinase anchor protein 7 isoform gamma	sp|Q7TN79|AKA7G_MOUSE A-kinase anchor protein 7 isoform gamma OS=Mus musculus OX=10090 GN=Akap7 PE=1 SV=2	35.46	2	7	16.6287	16.829	17.1908	16.676	17.2953	16.7245	16.6565	17.1649	16.937	17.3682	16.0929	16.446	16.8048	16.6755	17.0203	16.7052	16.5327	16.7756	16.6411	16.2581	16.9029	16.9017	16.7462	17.2167	17.2359	16.5806	16.7868	17.1373	16.6291	17.2439	16.6767	16.6139	17.1252	16.8939	17.3295	16.0631	16.4387	16.7688	16.6269	16.985	16.6869	16.5042
Q8BUY5	Q8BUY5	Timmdc1	Complex I assembly factor TIMMDC1, mitochondrial	sp|Q8BUY5|TIDC1_MOUSE Complex I assembly factor TIMMDC1, mitochondrial OS=Mus musculus OX=10090 GN=Timmdc1 PE=1 SV=1	31.77	3	8.8	14.9053	14.8903	15.0188	15.1206	14.8406	14.8526	14.7031	15.1761	15.2327	15.1928	14.018	14.2644	14.9155	15.0964	15.029	14.9364	14.9693	15.104	14.1197	13.9688	14.7663	14.7506	15.0987	14.8685	15.0938	14.8572	14.8481	14.9652	15.0737	14.7893	14.8048	14.6604	15.1364	15.1896	15.1541	13.9881	14.2571	14.8795	15.0478	14.9937	14.918	14.9409
Q8BZM0	Q8BZM0	Klhl12	Kelch-like protein 12	sp|Q8BZM0|KLH12_MOUSE Kelch-like protein 12 OS=Mus musculus OX=10090 GN=Klhl12 PE=2 SV=1	63.21	3	5.6	11.6893	11.4882	11.8573	11.5837	11.7116	11.3647	11.3758	11.7784	11.6242	11.8131	11.1638	11.651	11.5845	11.4216		11.1792	11.2577	11.9229	11.4027	11.0608		11.7674	11.6817	11.681	11.6351	10.9408	10.7456	11.1033	10.8364	10.9598	10.6165	10.6328	11.0382	10.8806	11.074	10.4335	10.9432	10.848	10.6726		10.4604	10.5288
P34928	P34928	Apoc1	Apolipoprotein C-I	sp|P34928|APOC1_MOUSE Apolipoprotein C-I OS=Mus musculus OX=10090 GN=Apoc1 PE=1 SV=1	9.69	2	20.5		13.3891	14.8399	13.9575	14.2746	13.2409	13.4986	13.7183	14.0823	14.0211		12.3878	13.395	14.5663	13.3922		13.2629	13.9863	16.0908	15.3618	14.0586	13.5413	14.1079	13.8789	13.9269		15.762	17.2013	16.3257	16.6382	15.6082	15.871	16.0936	16.4542	16.3975		14.7956	15.774	16.9327	15.7719		15.6495
Q67BT3	Q67BT3	Slc13a5	Na(+)/citrate cotransporter	sp|Q67BT3|S13A5_MOUSE Na(+)/citrate cotransporter OS=Mus musculus OX=10090 GN=Slc13a5 PE=1 SV=1	63.78	3	5.4	15.8076	15.8201	15.6374	15.997	15.8905	15.8042	15.8314	16.2517	15.9121	16.1429	15.0459	15.235	15.7003	15.932	16.0504	15.6377	15.6428	15.7498	15.3208	15.284	15.7178	15.5703	15.3733	15.4637	15.5404	15.8526	15.8711	15.6769	16.0432	15.9323	15.8495	15.8818	16.3051	15.9621	16.1973	15.1092	15.3208	15.7574	15.9765	16.1082	15.7124	15.7075
Q9JKS5	Q9JKS5	Habp4	Intracellular hyaluronan-binding protein 4	sp|Q9JKS5|HABP4_MOUSE Intracellular hyaluronan-binding protein 4 OS=Mus musculus OX=10090 GN=Habp4 PE=1 SV=2	45.9	6	15.8	15.5365	15.5052	15.6421	15.6498	15.4471	15.5303	15.3833	15.8593	15.7817	15.9817	14.7448	14.6272	15.5697	15.6242	15.6911	15.5248	15.5197	15.793	14.8331	14.8957	15.7307	15.6375	15.7265	15.6709	15.665	15.4009	15.3755	15.501	15.5155	15.3083	15.395	15.2532	15.7321	15.6512	15.8555	14.6274	14.5324	15.4462	15.4881	15.5683	15.4189	15.4039
P69566	P69566	Ranbp9	Ran-binding protein 9	sp|P69566|RANB9_MOUSE Ran-binding protein 9 OS=Mus musculus OX=10090 GN=Ranbp9 PE=1 SV=1	70.97	6	10.4	15.4497	15.4842	15.2755	15.4818	15.2647	15.2283	15.3149	15.6361	15.553	15.7036	14.654	14.7551	15.1801	15.4506	15.3522	15.4097	15.2997	15.5078	14.4815	14.8077	15.4191	15.4798	15.5396	15.5716	15.7411	14.878	14.9184	14.6984	14.9114	14.6898	14.657	14.7487	15.0728	14.9864	15.1413	14.1006	14.2243	14.6205	14.8785	14.7934	14.8677	14.7477
Q3TAQ9	Q3TAQ9	Wdr36	WD repeat domain 36	tr|Q3TAQ9|Q3TAQ9_MOUSE WD repeat domain 36 OS=Mus musculus OX=10090 GN=Wdr36 PE=1 SV=1	99.66	6	7	12.447	12.5109	13.0482	12.9716	12.8243	12.771	12.6191	13.2134	13.0896	13.1145	12.0812	12.2664	12.6751	13.0735	12.7065	12.7705	11.5544	12.6733	12.7783	12.5459	12.7193	12.7406	13.129	13.0748	12.9962	10.8443	10.9141	11.44	11.3702	11.2183	11.1686	11.0219	11.6191	11.492	11.5212	10.4967	10.7045	11.0844	11.4703	11.1166	11.1975	9.97137
Q5HZI2	Q5HZI2	C2cd4c	C2 calcium-dependent domain-containing protein 4C	sp|Q5HZI2|C2C4C_MOUSE C2 calcium-dependent domain-containing protein 4C OS=Mus musculus OX=10090 GN=C2cd4c PE=1 SV=1	44.59	12	43.7	15.7362	16.0609	16.0785	16.2477	16.1435	16.2514	15.8817	16.37	15.9942	16.5473	15.6258	15.1417	15.7302	16.4051	16.209	15.4335	15.7438	15.7243	16.0231	15.7983	16.5539	16.1814	16.3862	16.3248	15.8465	15.5182	15.8488	15.855	16.0309	15.9222	16.0337	15.6692	16.1604	15.7812	16.3387	15.426	14.9645	15.5242	16.1866	16.0038	15.2452	15.5455
P11352	P11352	Gpx1	Glutathione peroxidase 1	sp|P11352|GPX1_MOUSE Glutathione peroxidase 1 OS=Mus musculus OX=10090 GN=Gpx1 PE=1 SV=2	22.32	8	51.7	17.7448	17.8269	18.0975	17.9153	17.9128	17.8946	17.6624	17.9692	18.0459	18.1873	17.1305	17.0147	17.8398	18.0309	17.9667	17.8038	17.8447	17.9998	17.0794	17.0749	17.864	17.749	18.024	17.952	18.0921	17.8893	17.9774	18.2366	18.0611	18.0541	18.0394	17.8125	18.1221	18.1955	18.3412	17.2933	17.2001	17.9964	18.175	18.1241	17.9781	18.0089
O35126	O35126	Atn1	Atrophin-1	sp|O35126|ATN1_MOUSE Atrophin-1 OS=Mus musculus OX=10090 GN=Atn1 PE=1 SV=1	123.65	3	4.1	12.9954	12.6762	12.9805	12.741	13.084	12.3256	11.9007	12.6983	13.1155	12.5735	11.8843	12.0216	12.5139	12.4115	12.6603	12.6217	12.6316	12.6017	12.2292	12.0465	12.3215	12.442	12.1235	11.6261	12.1743	11.7378	11.4246	11.7174	11.4847	11.8232	11.0684	10.6486	11.4491	11.8629	11.3253	10.6449	10.8048	11.2684	11.1535	11.4156	11.3939	11.3937
P58873	P58873	Rhbdl3	Rhomboid-related protein 3	sp|P58873|RHBL3_MOUSE Rhomboid-related protein 3 OS=Mus musculus OX=10090 GN=Rhbdl3 PE=2 SV=1	45.24	2	5.4	12.1764		12.1974		12.5251	12.1854	12.3519	12.3652	12.5932	12.6166	11.6863	12.1323	12.0032	12.3157	12.2635			12.1463	12.1905	11.968	11.928	12.3712	12.4474	12.3497	12.2018	12.6688		12.6844		13.0143	12.6782	12.8499	12.866	13.0907	13.1185	12.197	12.6656	12.5077	12.8076	12.7688
P47964	P47964	Rpl36	Large ribosomal subunit protein eL36	sp|P47964|RL36_MOUSE Large ribosomal subunit protein eL36 OS=Mus musculus OX=10090 GN=Rpl36 PE=1 SV=3	12.25	2	19	15.8345	15.8127	16.0452	15.8291	15.6449	15.6422	15.5982	16.1588	15.9802	16.2114	14.8482	15.3837	15.7316	15.9539	15.889	15.7273	15.3707	15.746	15.4174	15.2322	16.5689	16.6046	16.6164	16.4893	16.7479	18.2014	18.1856	18.4067	18.1972	18.0086	18.0095	17.9706	18.5341	18.3521	18.5877	17.2333	17.7915	18.1106	18.3203	18.2688	18.1239	17.7573
P62717	P62717	Rpl18a	Large ribosomal subunit protein eL20	sp|P62717|RL18A_MOUSE Large ribosomal subunit protein eL20 OS=Mus musculus OX=10090 GN=Rpl18a PE=1 SV=1	20.72	4	26.1	14.931	14.612	14.9514	15.4448	14.6975	14.6672	14.9502	15.6617	15.2125	15.2541	13.8368	14.267	14.7879	15.4501	15.0465	14.6459	14.543	15.267	14.4331	14.6607	15.2075	15.2406	15.2637	15.5841	15.8402	15.7129	15.3999	15.7279	16.228	15.4762	15.4495	15.7376	16.4521	15.9995	16.0454	14.637	15.0897	15.5819	16.2316	15.8413	15.4576	15.3446
P54818	P54818	Galc	Galactocerebrosidase	sp|P54818|GALC_MOUSE Galactocerebrosidase OS=Mus musculus OX=10090 GN=Galc PE=1 SV=2	77.21	6	10.7	15.1484	15.3117	15.4956	15.2174	15.4497	15.2758	15.1026	15.4376	15.5319	15.5638	14.7624	13.9873	15.2585	15.3133	15.3919	15.3916	15.3258	15.3588	14.7345	14.5693	15.2498	15.1616	15.0685	15.3397	15.4181	14.1934	14.3626	14.5351	14.2636	14.4914	14.3211	14.1531	14.491	14.5819	14.6182	13.8257	13.0731	14.3156	14.3578	14.4497	14.4664	14.3904
Q3TY60	Q3TY60	Fam131b	Protein FAM131B	sp|Q3TY60|F131B_MOUSE Protein FAM131B OS=Mus musculus OX=10090 GN=Fam131b PE=1 SV=1	35.94	6	25.6	16.094	16.1578	15.9991	16.2371	16.0284	16.0727	15.9614	16.4815	16.4466	16.4338	15.394	15.3887	16.034	16.1876	16.3167	16.1058	15.7993	16.2741	15.3959	15.5803	16.2309	16.2069	16.2133	16.3331	16.3442	16.2386	16.3083	16.1382	16.3828	16.1697	16.2175	16.1114	16.6344	16.5961	16.5878	15.5567	15.5741	16.1905	16.3317	16.474	16.2801	15.9635
Q8CIH9	Q8CIH9	Ppat	Amidophosphoribosyltransferase	sp|Q8CIH9|PUR1_MOUSE Amidophosphoribosyltransferase OS=Mus musculus OX=10090 GN=Ppat PE=1 SV=1	57.37	2	4.3	12.5264	13.0505	13.2459	13.1609	13.3164	12.8006	12.7236	12.914	12.9874	13.4392	12.0405	12.5501	12.8599	13.0271	12.8123	12.374	12.6048	13.1531	12.8103	12.4998	12.2157	12.2548	13.0407	12.3825	12.85	11.7779	12.3079	12.4919	12.4135	12.5646	12.0524	11.9805	12.1738	12.2439	12.7	11.3102	11.8423	12.1234	12.2781	12.0765	11.6551	11.8759
Q91WQ5	Q91WQ5	Taf5l	TAF5-like RNA polymerase II p300/CBP-associated factor-associated factor 65 kDa subunit 5L	sp|Q91WQ5|TAF5L_MOUSE TAF5-like RNA polymerase II p300/CBP-associated factor-associated factor 65 kDa subunit 5L OS=Mus musculus OX=10090 GN=Taf5l PE=2 SV=1	65.87	4	7.8	13.3492	12.8305	13.1953	13.2392	12.8832	13.0917	13.4572	13.383	13.3151	13.1571	12.3284	12.4662	13.1002	12.9733	13.1506	12.9675	13.1114	13.0969	12.8857	12.3916	13.23	12.9312	13.3267	13.2312	13.0007	12.7161	12.2034	12.5567	12.6074	12.2469	12.459	12.8296	12.7583	12.6871	12.5334	11.7136	11.8739	12.4792	12.3397	12.5304	12.3642	12.498
Q8CCJ4	Q8CCJ4	Amer2	APC membrane recruitment protein 2	sp|Q8CCJ4|AMER2_MOUSE APC membrane recruitment protein 2 OS=Mus musculus OX=10090 GN=Amer2 PE=1 SV=2	69.89	10	20.8	15.4499	15.715	15.7688	16.123	15.9668	15.7081	15.5816	15.8091	15.8599	16.3005	15.2497	14.8217	15.5538	15.8265	15.9499	15.3289	15.3909	15.2723	15.736	15.7327	15.8474	15.6165	16.277	15.9266	15.5309	14.4476	14.7186	14.761	15.1219	14.9612	14.7061	14.5848	14.8151	14.8626	15.3076	14.2657	13.8602	14.5636	14.8237	14.9604	14.3563	14.4083
Q3TYP4	Q3TYP4	Tmem88b	Transmembrane protein 88B	sp|Q3TYP4|TM88B_MOUSE Transmembrane protein 88B OS=Mus musculus OX=10090 GN=Tmem88b PE=1 SV=2	18.54	2	12.7	13.5289	13.7303	13.0684	13.3419	13.585	13.5948	13.5571	13.1655	13.6096	13.0714	13.3182	13.1304	13.536	12.6166	12.8988	13.4254	13.0923	12.9163	13.1649	12.7346	12.5612	13.0866	12.4985	12.6947	12.1167	14.6734	14.8807	14.2074	14.4876	14.7263	14.7396	14.7072	14.3184	14.7592	14.2254	14.481	14.3158	14.6926	13.7606	14.0562	14.5996	14.2565
Q9Z2D6	Q9Z2D6	Mecp2	Methyl-CpG-binding protein 2	sp|Q9Z2D6|MECP2_MOUSE Methyl-CpG-binding protein 2 OS=Mus musculus OX=10090 GN=Mecp2 PE=1 SV=1	52.28	14	30.2	17.9048	18.2175	18.6419	18.6868	18.5429	18.3234	18.0771	18.4392	18.624	18.7314	17.6048	16.9896	18.1496	18.5967	18.6852	18.0078	18.1224	17.7714	18.536	18.3117	18.3638	18.3325	18.5987	18.4801	18.0574	17.3972	17.7159	18.1288	18.1805	18.0321	17.8162	17.575	17.94	18.1215	18.2332	17.1155	16.5228	17.6541	18.0887	18.1904	17.53	17.6345
Q3UFQ8	Q3UFQ8	Carmil3	Capping protein, Arp2/3 and myosin-I linker protein 3	sp|Q3UFQ8|CARL3_MOUSE Capping protein, Arp2/3 and myosin-I linker protein 3 OS=Mus musculus OX=10090 GN=Carmil3 PE=1 SV=2	150.32	6	5.7	12.6998	12.9045	12.8882	12.869	12.9206	12.8974	12.9563	13.196	13.1138	13.1197	12.3341	12.572	12.8557	13.2218	13.0463	12.342	12.5375	12.6402	12.5927	12.0127	13.2082	12.777	13.2275	13.0892	12.7241	10.6517	10.8623	10.8346	10.8221	10.8692	10.8496	10.9137	11.1562	11.0707	11.081	10.3042	10.5647	10.8196	11.1732	11.011	10.3236	10.5091
Q3U214	Q3U214	Mast3	Microtubule-associated serine/threonine-protein kinase 3	sp|Q3U214|MAST3_MOUSE Microtubule-associated serine/threonine-protein kinase 3 OS=Mus musculus OX=10090 GN=Mast3 PE=1 SV=3	144.08	16	14.5	14.7953	15.3236	15.4487	15.4734	15.33	15.262	15.1455	15.3152	15.7053	15.4682	14.7214	14.4886	15.5021	15.2903	15.3826	15.0514	14.8592	14.9605	14.9585	14.6487	15.2995	15.2415	15.4876	15.4312	15.162	12.8892	13.4234	13.5371	13.5685	13.4207	13.3563	13.2449	13.4174	13.8042	13.5715	12.8335	12.6234	13.608	13.3837	13.4894	13.175	12.9728
Q9JMC8	Q9JMC8	Epb41l4b	Band 4.1-like protein 4B	sp|Q9JMC8|E41LB_MOUSE Band 4.1-like protein 4B OS=Mus musculus OX=10090 GN=Epb41l4b PE=1 SV=2	59.53	2	3.4	11.528	11.7638	11.356	11.5792	11.4771	11.7379	11.3884	11.8871	11.5948	12.1294	10.7366	10.759	11.3032	11.7455	11.7514	11.4131	11.1498	11.4075	11.7696	11.0048	11.6368	11.6195	11.6316	11.1648	11.3707	11.0876	11.3293	10.9101	11.14	11.0334	11.2978	10.9534	11.455	11.1594	11.6983	10.3144	10.3594	10.8748	11.3045	11.3238	11.0024	10.729
Q08481	Q08481	Pecam1	Platelet endothelial cell adhesion molecule	sp|Q08481|PECA1_MOUSE Platelet endothelial cell adhesion molecule OS=Mus musculus OX=10090 GN=Pecam1 PE=1 SV=1	81.21	4	5.9	12.8793	12.6784	13.2928	12.799	13.0649	12.8446	12.2888	13.2467	13.093	12.9111	12.1421	12.1485	12.4209	12.8144	13.4381	12.6972	12.0643	12.7258	12.8519	12.4024	12.8896	13.0172	12.7578	13.2155	12.9248	11.6218	11.4267	12.0298	11.5427	11.8041	11.5874	11.0368	11.9975	11.8404	11.6629	10.9028	10.9318	11.1754	11.5563	12.1934	11.4694	10.8265
Q9D023	Q9D023	Mpc2	Mitochondrial pyruvate carrier 2	sp|Q9D023|MPC2_MOUSE Mitochondrial pyruvate carrier 2 OS=Mus musculus OX=10090 GN=Mpc2 PE=1 SV=1	14.28	3	28.3	16.9049	17.0872	17.4718	17.0968	17.315	16.9659	16.9167	17.5842	17.0901	17.4987	16.441	16.3063	16.9897	17.24	17.0068	16.8689	16.8595	17.079	17.0582	16.6964	17.139	16.9522	17.3736	17.253	17.4169	17.8568	18.0451	18.4182	18.0499	18.2636	17.9181	17.874	18.5445	18.047	18.46	17.4111	17.2989	17.9536	18.1914	17.9715	17.8505	17.8311
O88455	O88455	Dhcr7	7-dehydrocholesterol reductase	sp|O88455|DHCR7_MOUSE 7-dehydrocholesterol reductase OS=Mus musculus OX=10090 GN=Dhcr7 PE=1 SV=1	53.88	2	7	14.9215	14.9248	14.8882	14.7873	14.7947	14.9871	14.6999	15.1846	14.992	15.1465	14.6795	14.0326	14.6328	14.4906	14.6188	14.934	14.8439	14.8373	13.9793	14.8964	14.8251	14.6579	14.7308	14.7417	14.7566	15.414	15.4231	15.3752	15.281	15.284	15.4798	15.1978	15.6854	15.4895	15.6483	15.1902	14.5658	15.1373	14.9825	15.124	15.4562	15.356
Q9DCU2	Q9DCU2	Pllp	Plasmolipin	sp|Q9DCU2|PLLP_MOUSE Plasmolipin OS=Mus musculus OX=10090 GN=Pllp PE=1 SV=1	19.79	2	21.4	15.5614	15.5708	15.5612	15.4061	14.7666	15.0083	15.3098	15.0027	15.479	15.1287	14.7907	13.9569	14.7756	15.3711	15.5603	15.7331	14.6552	15.3935	14.5556	14.6219	14.9712	15.3577	15.2711	15.7021	14.8862	17.1914	17.2067	17.1857	17.0373	16.3934	16.6385	16.9452	16.641	17.114	16.768	16.4389	15.6277	16.4176	17.0006	17.203	17.3928	16.3049
Q922R1	Q922R1	Phaf1	Phagosome assembly factor 1	sp|Q922R1|PHAF1_MOUSE Phagosome assembly factor 1 OS=Mus musculus OX=10090 GN=Phaf1 PE=1 SV=2	47.39	4	13.7	15.7235	15.8904	15.6811	15.9062	15.7326	15.7948	15.7541	16.0445	16.059	16.0575	15.2089	15.2379	15.7488	15.7582	15.8295	15.7051	15.5782	15.803	15.272	15.1274	15.6702	15.4578	15.7697	15.649	15.6261	15.588	15.7608	15.54	15.7718	15.5938	15.6596	15.624	15.9173	15.9285	15.9314	15.0916	15.1431	15.6253	15.6221	15.7067	15.5993	15.4623
P10922	P10922	H1-0	Histone H1.0	sp|P10922|H10_MOUSE Histone H1.0 OS=Mus musculus OX=10090 GN=H1-0 PE=2 SV=4	20.85	3	13.9	16.9141	16.8511	17.4263	17.5366	17.385	17.3532	16.8744	17.2213	17.4803	17.3201	16.5454	16.5236	17.0002	17.7229	17.4284	16.6704	16.7004	16.4908	17.2631	16.6467	18.2439	17.9053	18.2717	17.9666	17.958	18.544	18.487	19.0508	19.1678	19.0117	18.9835	18.5099	18.8596	19.1153	18.9594	18.1936	18.1944	18.6422	19.3524	19.0712	18.3301	18.35
Q9R1E0	Q9R1E0	Foxo1	Forkhead box protein O1	sp|Q9R1E0|FOXO1_MOUSE Forkhead box protein O1 OS=Mus musculus OX=10090 GN=Foxo1 PE=1 SV=2	69.47	5	8.4	12.4275	12.4581	12.9278	12.5236	12.1887	12.6715	12.1113	12.5016	12.849	13.0347	11.7509	12.1495	12.6703	12.3559	12.6005	12.2737	11.6681	12.0205	12.4259	12.4126	12.2142	12.583	12.6852	12.6227	12.5711	11.6245	11.661	12.1193	11.7218	11.3825	11.8688	11.3138	11.7069	12.051	12.2411	10.9661	11.3873	11.8793	11.5524	11.8103	11.5005	10.8848
Q6P5E6	Q6P5E6	Gga2	ADP-ribosylation factor-binding protein GGA2	sp|Q6P5E6|GGA2_MOUSE ADP-ribosylation factor-binding protein GGA2 OS=Mus musculus OX=10090 GN=Gga2 PE=1 SV=1	66.01	3	6.3	12.1493	11.9214	12.3875	12.0703	12.4262	12.129	11.7567	12.2705	12.4577	12.2986	11.285	11.7466	12.2822	11.7774	12.4368	11.9401	11.412	11.913	12.1237	11.5887	11.7897	11.8371	12.4043	12.0068	12.136	11.2939	11.0719	11.5266	11.216	11.5675	11.2738	10.9067	11.4234	11.6072	11.4525	10.4478	10.932	11.4388	10.9215	11.5941	11.1143	10.5762
Q8BZ81	Q8BZ81	Lrrtm3	Leucine-rich repeat transmembrane neuronal protein 3	sp|Q8BZ81|LRRT3_MOUSE Leucine-rich repeat transmembrane neuronal protein 3 OS=Mus musculus OX=10090 GN=Lrrtm3 PE=2 SV=2	66.05	3	6.9	13.6663	13.3933	13.4496	13.6355	13.3857	13.7391	13.297	14.009	13.3117	14.3359	12.8259	13.2555	13.41	13.8443	13.4613	13.2888	13.0913	13.5298	13.1461	13.0101	14.0726	13.6955	13.88	13.798	13.6671	12.8634	12.5962	12.6412	12.8337	12.5794	12.9365	12.4995	13.2144	12.5138	13.5423	12.0411	12.4933	12.619	13.0408	12.6711	12.5155	12.308
Q8R1X6	Q8R1X6	Spart	Spartin	sp|Q8R1X6|SPART_MOUSE Spartin OS=Mus musculus OX=10090 GN=Spart PE=1 SV=1	72.61	14	21.2	14.7961	15.0563	15.1276	15.2237	15.1911	15.1112	14.9553	14.9519	15.5336	15.2583	14.483	14.0008	14.9851	15.3326	15.2189	14.7338	14.9415	14.6901	14.7931	14.6807	14.759	14.4827	15.1503	14.8403	14.6394	13.7938	14.0599	14.1198	14.2226	14.1856	14.1092	13.9585	13.9579	14.5364	14.2654	13.4989	13.0393	13.9949	14.3298	14.2294	13.7612	13.9589
Q8BIG7	Q8BIG7	Comtd1	Catechol O-methyltransferase domain-containing protein 1	sp|Q8BIG7|CMTD1_MOUSE Catechol O-methyltransferase domain-containing protein 1 OS=Mus musculus OX=10090 GN=Comtd1 PE=1 SV=1	28.94	3	14.5	17.1807	16.3224	16.8737	17.3366	17.1753	16.9789	16.7515	17.468	17.3123	17.5438	16.6588	16.4331	16.8812	17.0443	17.4087	16.4053	16.3247	17.0649	16.588	16.7934	16.7983	16.5831	17.0213	17.0386	17.2573	17.4321	16.5798	17.1197	17.5893	17.4235	17.2307	17.0084	17.7278	17.5688	17.8046	16.9285	16.7253	17.1447	17.2953	17.673	16.6865	16.5958
P70340	P70340	Smad1	Mothers against decapentaplegic homolog 1	sp|P70340|SMAD1_MOUSE Mothers against decapentaplegic homolog 1 OS=Mus musculus OX=10090 GN=Smad1 PE=1 SV=2	52.12	2	5.6	11.7131	11.9759				11.465	11.5292				11.8289	11.4895		10.4284		11.4792			11.5076		12.1568	11.7117	11.0861	11.349	11.2563	11.1414	11.4101				10.8937	10.963				11.2754	10.9587		9.85625		10.9373
O54929	O54929	Wsb2	WD repeat and SOCS box-containing protein 2	sp|O54929|WSB2_MOUSE WD repeat and SOCS box-containing protein 2 OS=Mus musculus OX=10090 GN=Wsb2 PE=2 SV=2	45.23	2	8.2	13.9784	13.9859	14.0718	14.3625	13.8457	14.03	13.8644	14.2716	14.5573	14.5604	13.5356	13.7134	14.0785	14.0807	13.7027	13.8094	13.3438	14.1228	13.9118	13.8975	13.1053	13.884	14.2247	13.7053	14.0102	14.0234	14.0368	14.1113	14.4088	13.8875	14.0753	13.9149	14.3249	14.6073	14.6148	13.5989	13.7992	14.1356	14.1252	13.7606	13.8841	13.4085
P26350	P26350	Ptma	Prothymosin alpha	sp|P26350|PTMA_MOUSE Prothymosin alpha OS=Mus musculus OX=10090 GN=Ptma PE=1 SV=2	12.25	4	13.5	17.9723	18.0481	17.9626	17.9609	17.6738	17.8487	17.7602	17.9467	18.1468	17.8119	17.3459	17.3199	17.666	17.4694	17.9491	17.9223	17.5195	17.6577	17.9742	16.982	17.7695	17.9998	17.9268	18.0729	17.7206	20.3393	20.421	20.324	20.329	20.0375	20.2159	20.1326	20.322	20.5188	20.1882	19.731	19.7276	20.045	19.8358	20.3289	20.319	19.9061
Q60760	Q60760	Grb10	Growth factor receptor-bound protein 10	sp|Q60760|GRB10_MOUSE Growth factor receptor-bound protein 10 OS=Mus musculus OX=10090 GN=Grb10 PE=1 SV=2	70.54	3	6.1	13.1918	13.3047	13.2655	13.1993	13.4701	13.4932	13.0802	13.2155	13.1013	13.504	12.7601	12.3307	13.2039	13.3861	13.2413	12.65	12.9408	13.0782	13.1016	12.8073	13.0292	13.2185	12.9985	12.951	12.8517	12.3364	12.4551	12.4045	12.345	12.6114	12.638	12.2303	12.3684	12.2509	12.6579	11.9228	11.516	12.3605	12.5301	12.3986	11.8242	12.105
Q80X68	Q80X68	Csl	Citrate synthase	tr|Q80X68|Q80X68_MOUSE Citrate synthase OS=Mus musculus OX=10090 GN=Csl PE=1 SV=1	52.29	4	14.4	20.969	21.2008	20.9499	21.5262	21.1134	21.2585	21.0863	21.516	21.3775	21.0111	20.7547	20.77	21.1129	20.6366	21.0145	20.9515	20.7975	21.0569	20.8188	20.7727	20.588	20.5312	20.7749	20.2375	20.2091	20.336	20.5737	20.3114	20.8943	20.4771	20.6258	20.4587	20.8913	20.7494	20.3874	20.1399	20.1777	20.4919	20.003	20.3942	20.3481	20.1841
Q8BH24	Q8BH24	Tm9sf4	Transmembrane 9 superfamily member 4	sp|Q8BH24|TM9S4_MOUSE Transmembrane 9 superfamily member 4 OS=Mus musculus OX=10090 GN=Tm9sf4 PE=1 SV=1	74.64	7	9	15.4122	15.3392	15.7462	15.6389	15.4863	15.4775	15.2395	15.7136	15.7535	15.9586	14.5074	14.6649	15.4894	15.8082	15.5817	15.2104	15.1697	15.811	15.0656	15.1399	15.6826	15.6978	15.8357	15.8206	15.8923	14.7792	14.7121	15.1077	15.007	14.85	14.8447	14.6119	15.0889	15.1255	15.335	13.8925	14.0726	14.8684	15.1746	14.9614	14.6071	14.5563
O54951	O54951	Sema6b	Semaphorin-6B	sp|O54951|SEM6B_MOUSE Semaphorin-6B OS=Mus musculus OX=10090 GN=Sema6b PE=1 SV=1	95.41	2	4.6			13.8038	13.9761	14.0521		13.7851	13.9973	14.1523	14.2972			14.1209	13.7703	13.9373		13.8397	13.8481	13.621	13.7974		14.2245	14.0656	13.7366	14.1063			12.621	12.8	12.8715		12.6132	12.8283	12.9799	13.1292			12.9555	12.5924	12.7727		12.682
Q8CHH5	Q8CHH5	Bicral	BRD4-interacting chromatin-remodeling complex-associated protein-like	sp|Q8CHH5|BICRL_MOUSE BRD4-interacting chromatin-remodeling complex-associated protein-like OS=Mus musculus OX=10090 GN=Bicral PE=1 SV=2	114.28	2	1.6	11.5278	11.7993	11.7622	11.9676	12.1691		11.9324	12.0133	12.1549	12.3508	10.9971	11.234	11.5676	11.8672	12.1479	11.8179	11.1203		11.699	11.5278	11.7151		11.822	12.0105	12.0912	10.4353	10.7127	10.6642	10.8763	11.0734		10.8453	10.9291	11.0675	11.2677	9.92281	10.1823	10.4871	10.7742	11.0682	10.7551	10.0475
P62075	P62075	Timm13	Mitochondrial import inner membrane translocase subunit Tim13	sp|P62075|TIM13_MOUSE Mitochondrial import inner membrane translocase subunit Tim13 OS=Mus musculus OX=10090 GN=Timm13 PE=1 SV=1	10.45	3	33.7	18.4131	18.4362	18.7107	18.6323	18.719	18.3556	18.3611	18.8278	18.9021	19.1336	17.6862	17.8549	18.4853	18.5649	18.644	18.6894	18.3793	18.7871	17.898	18.1988	18.5341	18.587	18.6751	18.675	19.1536	19.78	19.809	20.0721	20.0004	20.0827	19.7228	19.7336	20.2031	20.274	20.51	19.0714	19.2627	19.8643	19.9313	20.0237	20.0861	19.7659
Q9DBU3	Q9DBU3	Riok3	Serine/threonine-protein kinase RIO3	sp|Q9DBU3|RIOK3_MOUSE Serine/threonine-protein kinase RIO3 OS=Mus musculus OX=10090 GN=Riok3 PE=1 SV=3	58.67	4	8.5	13.2606	13.4106	13.3109	13.4896	13.4914	13.3779	12.9211	13.3248	13.1265	13.5174	12.5217	12.7919	13.2195	13.2743	13.3668	13.3248	13.0341	13.0245	12.7509	12.6194	13.1189	12.9205	13.4029	13.3838	13.3082	12.6276	12.7835	12.6724	12.8577	12.8551	12.7451	12.2936	12.7001	12.4984	12.8937	11.9068	12.1996	12.5985	12.6407	12.7465	12.7215	12.4208
Q69ZL1	Q69ZL1	Fgd6	FYVE, RhoGEF and PH domain-containing protein 6	sp|Q69ZL1|FGD6_MOUSE FYVE, RhoGEF and PH domain-containing protein 6 OS=Mus musculus OX=10090 GN=Fgd6 PE=1 SV=2	155.07	4	3.9	11.7938		11.6595	11.9129	11.3774	11.9968	11.2444	11.7827	11.6216		11.6097		11.2417	11.4474	11.6599	11.5165			11.4629	11.0172	11.5154	11.3458				9.3028		9.16292	9.42304	8.88308	9.50607	8.7588	9.30001	9.13554		9.13689		8.76275	8.95589	9.18167	9.05516
Q9QZL6	Q9QZL6	Usp21	Ubiquitin carboxyl-terminal hydrolase 21	sp|Q9QZL6|UBP21_MOUSE Ubiquitin carboxyl-terminal hydrolase 21 OS=Mus musculus OX=10090 GN=Usp21 PE=1 SV=1	62.63	3	4.9	14.0873	14.3971	14.4784	14.4823	14.5174	14.4843	14.2299	14.5689	14.5282	14.9879	13.9455	13.9128	14.2342	14.3529	14.5045	14.0308	13.8481	14.1883	14.2825	14.1672	14.5973	14.1559	14.5946	14.5605	14.4333	13.085	13.4007	13.4706	13.4812	13.5119	13.4823	13.2331	13.575	13.5309	13.995	12.9614	12.9513	13.244	13.3501	13.515	13.0583	12.8654
Q499E5	Q499E5	Stox2	Storkhead-box protein 2	sp|Q499E5|STOX2_MOUSE Storkhead-box protein 2 OS=Mus musculus OX=10090 GN=Stox2 PE=2 SV=2	102.69	2	4	10.3124	10.8022	10.8937	10.7772	10.6889	10.7203	10.8622	10.9485	11.2733	11.2146			10.8928	10.9678	11.0484	10.883	10.6454	11.086	10.4051	10.3058	10.7312	10.532	10.8619	10.9843	10.9928	8.80484	9.30055	9.38072	9.2709	9.17813	9.21308	9.36011	9.44932	9.77075	9.71642			9.39729	9.45977	9.55364	9.40516	9.15751
O54799	O54799	Nmbr	Neuromedin-B receptor	sp|O54799|NMBR_MOUSE Neuromedin-B receptor OS=Mus musculus OX=10090 GN=Nmbr PE=1 SV=1	43.59	2	5.6	12.2617	12.5921	12.5657		12.3049	13.0983	12.7937	13.2266	12.761	13.5852	11.8554		12.5143	12.9775	12.6596	12.9639	12.2179	13.0262	12.5779	12.3122	13.3935	12.6927	13.0403	12.6026	12.3339	12.0437	12.38	12.3422		12.0837	12.8806	12.5811	13.0169	12.548	13.3766	11.6556		12.3084	12.759	12.4544	12.7756	12.0195
Q9QX66	Q9QX66	Dpf1	Zinc finger protein neuro-d4	sp|Q9QX66|DPF1_MOUSE Zinc finger protein neuro-d4 OS=Mus musculus OX=10090 GN=Dpf1 PE=1 SV=2	44.21	3	7.8	13.7469	13.7737	13.9863	13.9516	13.7947	13.7884	13.7894	14.0971	14.2843	14.4702	13.2089	13.0547	13.9345	13.9176	14.1502	13.6683	13.3494	14.0237	13.5842	13.5114	13.7247	13.9405	14.1573	14.1477	14.2344	13.2394	13.2721	13.4733	13.4453	13.2839	13.2812	13.2874	13.5979	13.7818	13.9721	12.7196	12.588	13.439	13.4096	13.6555	13.1905	12.8616
Q922E6	Q922E6	Fastkd2	FAST kinase domain-containing protein 2, mitochondrial	sp|Q922E6|FAKD2_MOUSE FAST kinase domain-containing protein 2, mitochondrial OS=Mus musculus OX=10090 GN=Fastkd2 PE=2 SV=2	78.9	3	4.4	12.6355	11.7159	12.6667	12.6704	12.6135	12.2393	11.9429	12.9532	13.0059	12.861	11.8462	12.0983	12.2515	12.4338	12.3558	12.126	12.407	11.9729	12.5491	11.9873	12.237	12.2452	12.2204	12.439	12.6721	11.128	10.2142	11.1537	11.1641	11.1027	10.732	10.4408	11.4541	11.5034	11.3629	10.3569	10.6315	10.756	10.9258	10.8611	10.6482	10.9191
Q60991	Q60991	Cyp7b1	Cytochrome P450 7B1	sp|Q60991|CP7B1_MOUSE Cytochrome P450 7B1 OS=Mus musculus OX=10090 GN=Cyp7b1 PE=1 SV=2	58.43	2	3.2	14.2619	14.2806	14.7263	14.3986	14.3562	14.075	14.1734	14.574	14.5566	14.8762	13.8199	14.0583	14.5269	14.1183	14.2625	14.5693	14.4216	14.6541	13.7066	12.8722	13.8797	14.1572	14.343	14.0255	14.6436	13.5134	13.5379	13.9723	13.6513	13.6044	13.3267	13.4304	13.8338	13.813	14.1371	13.0896	13.3505	13.7904	13.3692	13.5268	13.8505	13.6928
P0DN89	P0DN89	Tmem254	Transmembrane protein 254	sp|P0DN89|TM254_MOUSE Transmembrane protein 254 OS=Mus musculus OX=10090 GN=Tmem254 PE=1 SV=1	14.23	2	17.9	13.6185	13.9447	14.0937	13.6977	13.6548	13.6571	13.7763	13.8663	13.9928	14.0608	13.0226	12.6289	13.6309	14.057	13.8317	14.1068	13.5767	13.8679	13.4267	12.9461	14.0035	14.0988	14.0891	13.9382	14.3078	15.5704	15.9025	16.0401	15.6508	15.6035	15.6093	15.7337	15.8265	15.9497	16.0221	14.9927	14.6216	15.5948	16.0084	15.7964	16.0884	15.5483
Q5U4C1	Q5U4C1	Gprasp1	G-protein coupled receptor-associated sorting protein 1	sp|Q5U4C1|GASP1_MOUSE G-protein coupled receptor-associated sorting protein 1 OS=Mus musculus OX=10090 GN=Gprasp1 PE=1 SV=1	151.65	17	17	14.2705	14.415	14.4919	14.5515	14.4599	14.449	14.2004	14.5332	14.7043	14.7538	13.8447	13.6729	14.2661	14.3996	14.7619	14.2543	13.948	14.1283	14.2584	14.0319	14.5897	14.5524	14.6306	14.5557	14.5321	12.3398	12.4902	12.5557	12.622	12.526	12.5185	12.2752	12.6108	12.7786	12.8324	11.9322	11.7829	12.3474	12.4683	12.8439	12.3533	12.0369
Q99JY4	Q99JY4	Trabd	TraB domain-containing protein	sp|Q99JY4|TRABD_MOUSE TraB domain-containing protein OS=Mus musculus OX=10090 GN=Trabd PE=1 SV=1	42.16	2	5.6	14.2269	14.2262	14.4194	14.3609	14.3452	14.2756	14.038	14.4964	14.4367	14.2661	13.3834	13.3763	14.3629	14.0255	13.956	14.0692	14.0771	14.3173	14.4001	13.8619	14.1811	13.9267	14.5737	14.0954	14.2613	14.0913	14.0965	14.2784	14.2265	14.2064	14.1403	13.9079	14.3692	14.3061	14.14	13.2661	13.2815	14.2394	13.8894	13.8333	13.9633	13.9612
Q8BQM4	Q8BQM4	Heatr3	HEAT repeat-containing protein 3	sp|Q8BQM4|HEAT3_MOUSE HEAT repeat-containing protein 3 OS=Mus musculus OX=10090 GN=Heatr3 PE=1 SV=1	74.26	5	8.2	13.273	13.4972	13.8147	13.6958	13.6897	13.5296	13.2267	13.5339	13.8613	13.532	12.4947	12.5343	13.6773	13.7456	13.7386	13.4423	13.4451	13.6101	13.1388	12.5702	13.6447	13.4519	13.7794	13.7411	13.1902	12.2707	12.5008	12.807	12.6947	12.6842	12.5276	12.2299	12.5399	12.864	12.5391	11.5106	11.5728	12.6871	12.7428	12.7491	12.4697	12.4625
Q9D1F9	Q9D1F9	Slc37a4	Solute carrier family 37 (Glucose-6-phosphate transporter), member 4	tr|Q9D1F9|Q9D1F9_MOUSE Solute carrier family 37 (Glucose-6-phosphate transporter), member 4 OS=Mus musculus OX=10090 GN=Slc37a4 PE=1 SV=1	46.03	2	5.4	14.5636	14.6465	14.7013	14.6516	14.6153	14.5066	14.4914	14.8676	14.8152	14.9838	13.832	14.1269	14.4343	14.678	14.435	14.6035	14.4724	14.7877	14.0774	14.1456	14.5487		14.634	14.7528	15.0266	14.9305	15.0193	15.0628	15.0198	14.979	14.8738	14.8638	15.2429	15.1872	15.3602	14.2172	14.5346	14.8133	15.0444	14.8148	15.0001	14.859
P97291	P97291	Cdh8	Cadherin-8	sp|P97291|CADH8_MOUSE Cadherin-8 OS=Mus musculus OX=10090 GN=Cdh8 PE=1 SV=2	88.16	7	12.4	14.3575	14.2372	14.4987	14.5177	14.4045	14.3343	14.4498	14.8565	14.7916	14.9068	13.5244	13.8409	14.6549	14.2381	14.7515	14.3963	13.8304	14.5604	14.1532	14.1546	14.6653	14.6832	14.6561	14.662	14.8227	13.502	13.3876	13.6377	13.6635	13.5458	13.4791	13.5998	14.0094	13.9412	14.0608	12.6871	13.0262	13.8114	13.3821	13.9089	13.5706	12.9947
P19426	P19426	Nelfe	Negative elongation factor E	sp|P19426|NELFE_MOUSE Negative elongation factor E OS=Mus musculus OX=10090 GN=Nelfe PE=1 SV=2	42.53	3	9.3	12.3487	12.267	12.707	12.8673	12.0241	12.1987	12.2064	12.3958	12.7126	12.9158	11.85	12.3257	11.8673	12.8752	12.8603	11.9467	12.1208	11.4669	11.8909	12.1914		11.9238	11.8381	11.9642	12.641	12.1307	12.0549	12.4835	12.6505	11.8028	11.981	11.9938	12.1861	12.4996	12.7071	11.6502	12.1485	11.6613	12.6566	12.6551	11.7584	11.9225
P56528	P56528	Cd38	ADP-ribosyl cyclase/cyclic ADP-ribose hydrolase 1	sp|P56528|CD38_MOUSE ADP-ribosyl cyclase/cyclic ADP-ribose hydrolase 1 OS=Mus musculus OX=10090 GN=Cd38 PE=1 SV=2	34.39	3	10.5	16.2519	15.9815	16.0165	16.1783	15.7373	16.0999	16.1841	16.0332	16.2473	15.959	15.3899	15.5972	16.0932	15.7711	16.0628	15.633	16.0966	16.0773	15.4732	15.2536	15.7074	16.4212	16.2735	16.2731	16.5751	16.2038	15.9393	15.9629	16.1314	15.6859	16.0521	16.1414	15.9935	16.2042	15.9203	15.3601	15.5899	16.0572	15.7225	16.0275	15.6147	16.0682
Q99J31	Q99J31	Ophn1	Oligophrenin-1	sp|Q99J31|OPHN1_MOUSE Oligophrenin-1 OS=Mus musculus OX=10090 GN=Ophn1 PE=1 SV=1	91.93	15	18.5	14.7507	15.0267	15.1196	15.1993	14.9458	15.0824	14.9028	15.1579	15.3681	15.2915	14.3819	14.248	15.032	15.2842	15.0189	14.4573	14.6183	14.8171	14.9663	14.7815	15.2469	14.9581	15.2896	15.2554	14.9424	13.0021	13.284	13.3656	13.452	13.194	13.3342	13.1597	13.4177	13.6246	13.5523	12.6515	12.5402	13.2955	13.5351	13.2832	12.7385	12.8894
Q9WTR1	Q9WTR1	Trpv2	Transient receptor potential cation channel subfamily V member 2	sp|Q9WTR1|TRPV2_MOUSE Transient receptor potential cation channel subfamily V member 2 OS=Mus musculus OX=10090 GN=Trpv2 PE=1 SV=2	85.91	8	11.9	15.4426	15.4749	15.4707	15.5148	15.5349	15.4472	15.3097	15.737	15.6492	15.7997	14.7186	14.5067	15.6429	15.5582	15.481	15.5822	15.62	15.5667	14.7809	14.6873	15.7303	15.7116	15.6707	15.8074	15.6604	14.4403	14.4786	14.4629	14.5137	14.5293	14.4452	14.3129	14.7431	14.6519	14.8068	13.7346	13.5452	14.6527	14.5554	14.4915	14.6096	14.6373
Q8K2Y9	Q8K2Y9	Ccm2	Cerebral cavernous malformations protein 2 homolog	sp|Q8K2Y9|CCM2_MOUSE Cerebral cavernous malformations protein 2 homolog OS=Mus musculus OX=10090 GN=Ccm2 PE=1 SV=1	49.89	8	24.7	14.2277	14.3684	14.5408	14.5204	14.4038	14.3794	14.3397	14.5625	14.7686	14.7176	13.7651	13.7966	14.2781	14.2493	14.5833	14.3801	14.1266	14.5718	14.0415	13.8016	14.4899	14.716	14.7029	14.731	14.7401	13.5947	13.7412	13.9023	13.8885	13.7675	13.7466	13.7121	13.9378	14.1405	14.0939	13.1502	13.2043	13.657	13.6157	13.963	13.7767	13.5132
Q8CBX0	Q8CBX0	Tmem63c	Calcium permeable stress-gated cation channel 1	sp|Q8CBX0|CSC1_MOUSE Calcium permeable stress-gated cation channel 1 OS=Mus musculus OX=10090 GN=Tmem63c PE=1 SV=1	92.95	5	5.9	12.0074	12.1194	11.9862	12.1633	12.1778	12.1091	12.0612	12.4263	12.2115	12.6041	11.1997	11.9084	12.0549	12.0837	12.2576	12.0173	12.0477	12.2682	11.408	11.3927	12.253	12.1328	12.3644	12.3382	12.3858	11.3155	11.4334	11.2887	11.4726	11.4826	11.4175	11.3748	11.7427	11.5246	11.9216	10.526	11.2572	11.375	11.3912	11.5785	11.3551	11.3755
Q6ZWV7	Q6ZWV7	Rpl35	Large ribosomal subunit protein uL29	sp|Q6ZWV7|RL35_MOUSE Large ribosomal subunit protein uL29 OS=Mus musculus OX=10090 GN=Rpl35 PE=1 SV=1	14.54	2	13.8	17.3222	17.2395	17.7908	17.357	17.4206	17.2514	17.2893	17.7825	17.4121	17.9581	16.8944	16.9416	17.4385	17.3194	17.3	17.1983	16.9877	17.2442	17.2842	16.987	18.1028	18.0517	17.6893	17.8826	18.1872	19.6891	19.6123	20.1522	19.7251	19.7843	19.6187	19.6617	20.1578	19.7841	20.3344	19.2796	19.3494	19.8175	19.6858	19.6797	19.5949	19.3743
A0A0A6YW67	A0A0A6YW67;P0CG49;P0CG50;P62983;P62984	Gm8797	Predicted pseudogene 8797	tr|A0A0A6YW67|A0A0A6YW67_MOUSE Predicted pseudogene 8797 OS=Mus musculus OX=10090 GN=Gm8797 PE=4 SV=1	8.72	4	58.4	21.1681	21.2295	21.3693	21.3929	21.5705	21.4382	21.2566	21.441	21.4881	21.8222	20.9854	21.1667	21.3024	20.9902	21.3745	20.9298	21.0984	20.9237	21.1299	21.0489	20.7304	21.152	20.9985	20.8304	20.7577	23.12	23.1873	23.3157	23.3461	23.5191	23.3904	23.214	23.4013	23.4451	23.7835	22.9555	23.1594	23.2664	22.9416	23.3392	22.9114	23.0699
Q61263	Q61263	Soat1	Sterol O-acyltransferase 1	sp|Q61263|SOAT1_MOUSE Sterol O-acyltransferase 1 OS=Mus musculus OX=10090 GN=Soat1 PE=1 SV=2	63.76	3	9.1	16.6454	16.5667	17.1196	16.8194	16.7848	16.6733	16.2862	16.9292	16.9467	17.0805	15.2853	16.4939	16.5984	17	16.8222	16.5169	16.4289	16.5503	16.5921	16.3372	16.8697	16.6018	16.7171	16.5147	16.7149	16.1379	16.0651	16.6066	16.3131	16.2741	16.1661	15.7841	16.43	16.4442	16.5823	14.796	16.0272	16.1029	16.492	16.3275	16.0391	15.941
Q9QY06	Q9QY06	Myo9b	Unconventional myosin-IXb	sp|Q9QY06|MYO9B_MOUSE Unconventional myosin-IXb OS=Mus musculus OX=10090 GN=Myo9b PE=1 SV=2	238.69	2	0.8	12.9399	13.0692	13.0357	12.7753		12.8942		13.183	13.132	13.4928	12.8069	12.9783	13.1859		13.0475	13.1095	12.8723			12.8054			13.2578	13.1225		10.0845	10.2196	10.1748	9.92107		10.0391		10.3359	10.2815	10.6468	9.96972	10.1637	10.3425		10.2049	10.2838	10.0365
Q8C142	Q8C142	Ldlrap1	Low density lipoprotein receptor adapter protein 1	sp|Q8C142|ARH_MOUSE Low density lipoprotein receptor adapter protein 1 OS=Mus musculus OX=10090 GN=Ldlrap1 PE=1 SV=3	33.95	2	10.7	11.2625	12.233	12.6105	11.8595	11.8377	12.0481	11.6549	11.2045	12.3369	11.5568	11	10.7382	11.8358		11.8117	12.0424	12.2213	11.6063	11.6687	11.5172	11.6799	11.266	12.122	11.7793	10.7699	11.127	12.1033	12.4695	11.7252	11.6989	11.9129	11.5249	11.0773	12.2064	11.4306	10.8827	10.6434	11.7123		11.6889	11.9366	12.1054
Q8R5A0	Q8R5A0	Smyd2	N-lysine methyltransferase SMYD2	sp|Q8R5A0|SMYD2_MOUSE N-lysine methyltransferase SMYD2 OS=Mus musculus OX=10090 GN=Smyd2 PE=1 SV=1	49.53	2	4.4	12.9882	12.9151	12.9224	12.9001	13.2187	12.8892	13.0222	13.1212	13.3146	13.3247	12.4113	12.5809	13.0979	13.0302	13.1677	12.8138	12.6915	12.9051	12.4245	12.2801	12.8934	12.8424	12.9194	12.9222	13.0083	12.8526	12.7854	12.7813	12.7658	13.0799	12.754	12.8921	12.9939	13.184	13.1985	12.294	12.4862	12.9744	12.8941	13.045	12.708	12.5756
P62141	P62141	Ppp1cb	Serine/threonine-protein phosphatase PP1-beta catalytic subunit	sp|P62141|PP1B_MOUSE Serine/threonine-protein phosphatase PP1-beta catalytic subunit OS=Mus musculus OX=10090 GN=Ppp1cb PE=1 SV=3	37.16	7	28.4	17.6902	17.5729	17.7272	17.6844	17.6723	17.6626	17.8128	18.0351	17.7207	17.9647	16.7689	17.1459	17.5971	17.5966	17.7102	17.9072	17.5419	17.8285	17.1059	17.1351	17.6573	17.4853	17.6639	17.5486	17.8646	17.5546	17.4432	17.5862	17.55	17.5335	17.5274	17.6827	17.9079	17.5902	17.8386	16.6516	17.0511	17.4736	17.4605	17.5874	17.8014	17.426
Q6PFX7	Q6PFX7	Nyap1	Neuronal tyrosine-phosphorylated phosphoinositide-3-kinase adapter 1	sp|Q6PFX7|NYAP1_MOUSE Neuronal tyrosine-phosphorylated phosphoinositide-3-kinase adapter 1 OS=Mus musculus OX=10090 GN=Nyap1 PE=1 SV=1	87.61	2	2.9	13.7263	13.797	13.674	13.8321	13.7646	13.7565	13.6727	14.0057	13.951	14.0474	13.281	13.6246	13.8181	13.6431	13.8092	13.6384	13.4697	13.2598	13.3021	13.1764	13.7543	13.1894	13.8359	13.5692	13.5792	12.3928	12.4694	12.3351	12.4998	12.4279	12.4233	12.3446	12.6806	12.6226	12.7233	11.9657	12.3319	12.4967	12.309	12.4885	12.3347	12.1558
P35601	P35601	Rfc1	Replication factor C subunit 1	sp|P35601|RFC1_MOUSE Replication factor C subunit 1 OS=Mus musculus OX=10090 GN=Rfc1 PE=1 SV=2	125.91	2	2.1			11.9968	12.1719		12.0868	10.9627		11.9177	11.774				12.4388			10.5818		11.9652				12.038	11.9697				10.1103	10.2921		10.2061	9.08719		10.0417	9.90241				10.5573			8.72044
P56183	P56183	Rrp1	Ribosomal RNA processing protein 1 homolog A	sp|P56183|RRP1_MOUSE Ribosomal RNA processing protein 1 homolog A OS=Mus musculus OX=10090 GN=Rrp1 PE=1 SV=2	54.74	4	9.9	12.9245	12.8491	13.2974	13.4355	13.093	13.1763	12.8034	13.1445	13.4917	13.4873	12.4841	12.1817	13.0077	13.1804	13.3494	12.9737	12.7619	12.7801	12.9973	12.7837	13.1833	12.938	13.4651	13.3857	13.0683	12.3529	12.2833	12.7202	12.8651	12.5181	12.605	12.2372	12.5812	12.9251	12.925	11.9307	11.6508	12.4481	12.6082	12.7905	12.4318	12.21
Q9DC51	Q9DC51	Gnai3	Guanine nucleotide-binding protein G(i) subunit alpha-3	sp|Q9DC51|GNAI3_MOUSE Guanine nucleotide-binding protein G(i) subunit alpha-3 OS=Mus musculus OX=10090 GN=Gnai3 PE=1 SV=3	40.51	2	9.3	14.0897	14.2559	14.1039	14.2135	14.6694	14.29	14.0066	14.335	14.5136	14.4704	13.5874	13.7377	14.0148	14.2704	14.1116	14.0325	14.292	14.2279	13.8906	13.5846	14.3692	14.3193	14.4619	14.2572	14.3902	14.1347	14.3068	14.1434	14.2597	14.7112	14.3353	14.0571	14.3883	14.5637	14.5248	13.6507	13.8235	14.0718	14.3149	14.1694	14.1072	14.3567
Q08890	Q08890	Ids	Iduronate 2-sulfatase	sp|Q08890|IDS_MOUSE Iduronate 2-sulfatase OS=Mus musculus OX=10090 GN=Ids PE=2 SV=3	62.15	4	7.2	15.4948	15.207	15.3463	15.4342	15.5356	15.0651	15.2754	15.5284	15.3825	15.5599	14.8891	14.4427	15.0694	15.3402	15.3291	15.1643	15.1722	15.2911	14.6278	15.3087	15.4892	15.2814	15.3241	15.1275	15.4549	14.7462	14.4644	14.5922	14.6869	14.7838	14.3169	14.5323	14.7883	14.639	14.8207	14.1588	13.735	14.3329	14.5912	14.5934	14.4455	14.4433
Q689Z5	Q689Z5	Sbno1	Protein strawberry notch homolog 1	sp|Q689Z5|SBNO1_MOUSE Protein strawberry notch homolog 1 OS=Mus musculus OX=10090 GN=Sbno1 PE=1 SV=2	153.64	8	6.9	15.9751	16.0956	16.3324	16.3083	16.2773	16.1948	16.0871	16.3839	16.429	16.5677	15.28	15.647	16.1757	16.237	16.1512	16.1783	15.9224	16.3163	15.7708	15.7794	16.2966	16.3573	16.4217	16.4699	16.5389	13.9047	14.0311	14.2565	14.239	14.2035	14.1247	14.0221	14.3218	14.3636	14.5066	13.2278	13.6173	14.1172	14.166	14.0935	14.1375	13.8716
Q8VDH1	Q8VDH1	Fbxo21	F-box only protein 21	sp|Q8VDH1|FBX21_MOUSE F-box only protein 21 OS=Mus musculus OX=10090 GN=Fbxo21 PE=1 SV=1	72.13	6	14	15.1244	15.1798	15.3509	15.2515	15.1866	15.282	15.3499	15.3797	15.4139	15.566	14.5799	14.7348	15.2012	15.1706	15.1687	15.1256	15.0783	15.4765	14.7781	14.5798	15.2274	15.1815	15.3638	15.2895	15.54	14.5527	14.6141	14.7737	14.681	14.6117	14.7107	14.7837	14.8164	14.8473	15.0037	14.0265	14.2039	14.6416	14.5984	14.6098	14.5836	14.5264
Q8VBU8	Q8VBU8	Banp	Protein BANP	sp|Q8VBU8|BANP_MOUSE Protein BANP OS=Mus musculus OX=10090 GN=Banp PE=1 SV=1	59.62	2	4.6		11.6448	12.2384	12.1146	11.728	11.8194	11.2636	11.8316	12.1647	12.373	11.5299	11.4444	11.9095	12.0105	11.8283			11.9853	11.7338	11.8046	11.6608	11.7824	12.1202	12.2309	11.9473		11.5152	12.0973	11.9802	11.5892	11.6841	11.1335	11.7044	12.0342	12.2468	11.4126	11.3496	11.786	11.8744	11.7055
Q8CJ61	Q8CJ61	Cmtm4	CKLF-like MARVEL transmembrane domain-containing protein 4	sp|Q8CJ61|CKLF4_MOUSE CKLF-like MARVEL transmembrane domain-containing protein 4 OS=Mus musculus OX=10090 GN=Cmtm4 PE=1 SV=1	22.91	3	10.6	15.8137	15.9626	16.0067	16.0176	15.8838	15.9019	15.828	16.2261	16.1134	16.3982	15.0758	15.1056	15.9241	16.201	16.1625	15.8239	15.591	16.183	15.4032	15.4949	16.063	16.0521	16.1083	16.102	16.1464	18.1807	18.3355	18.3682	18.3857	18.2475	18.2691	18.2004	18.6014	18.4853	18.7745	17.4609	17.5133	18.3031	18.5674	18.5422	18.2206	17.9777
Q9QUR7	Q9QUR7	Pin1	Peptidyl-prolyl cis-trans isomerase NIMA-interacting 1	sp|Q9QUR7|PIN1_MOUSE Peptidyl-prolyl cis-trans isomerase NIMA-interacting 1 OS=Mus musculus OX=10090 GN=Pin1 PE=1 SV=1	18.36	2	12.7	17.8275	17.963	18.1024	18.1208	18.1293	17.768	17.974	18.2475	18.2483	18.516	17.4331	17.5777	17.9841	18.0069	18.0718	17.9287	17.9135	17.9073	17.4452	17.4475	17.8511	17.8099	17.8837	17.6552	18.1412	18.4574	18.5989	18.7269	18.752	18.756	18.3983	18.6094	18.8858	18.8833	19.1554	18.0813	18.2485	18.6261	18.6364	18.7145	18.5883	18.5631
Q8K358	Q8K358	Pigu	Phosphatidylinositol glycan anchor biosynthesis class U protein	sp|Q8K358|PIGU_MOUSE Phosphatidylinositol glycan anchor biosynthesis class U protein OS=Mus musculus OX=10090 GN=Pigu PE=1 SV=4	49.77	3	8.8	14.606	14.8232	14.8539	14.8616	14.705	14.6621	14.6202	15.1209	14.9649	14.9239	14.0402	14.1779	14.7991	14.6916	14.7992	14.945	14.5944	15.0675	13.8754	13.9767	14.6399	14.4244	14.7187	14.5007	14.7871	15.236	15.4591	15.4784	15.4928	15.3318	15.2924	15.2557	15.7592	15.5999	15.5632	14.6884	14.8487	15.4412	15.321	15.4419	15.6046	15.2441
Q8VDD9	Q8VDD9	Phip	PH-interacting protein	sp|Q8VDD9|PHIP_MOUSE PH-interacting protein OS=Mus musculus OX=10090 GN=Phip PE=1 SV=2	206.6	7	4.6	11.9276	12.4403	12.5444	12.5392	12.6177	12.372	12.1456	12.4335	12.7376	12.8552	11.4515	11.6736	12.4076	12.6593	12.6906	12.046	12.2211	11.9106	12.3452	12.0379	12.639	12.4054	12.8738	12.7784	12.3865	9.47007	9.98876	10.0815	10.0829	10.1569	9.91482	9.69356	9.98435	10.2851	10.4071	9.01222	9.25688	9.96212	10.2013	10.2459	9.61824	9.7833
Q9CR09	Q9CR09	Ufc1	Ubiquitin-fold modifier-conjugating enzyme 1	sp|Q9CR09|UFC1_MOUSE Ubiquitin-fold modifier-conjugating enzyme 1 OS=Mus musculus OX=10090 GN=Ufc1 PE=1 SV=1	19.47	4	28.7	15.1921	15.246	15.3815	15.6921	15.9059	14.3931	14.7906	15.0478	15.5921	15.9523	14.7145	14.0662	14.6572	15.2774	16.3208	14.9106	14.5752	15.1379	15.1249	15.2398	14.2505	14.5148	15.0848	15.1293	15.0922	16.144	16.2039	16.3279	16.6452	16.8546	15.3453	15.7479	16.008	16.549	16.9136	15.6846	15.0589	15.6212	16.2288	17.2855	15.8922	15.5468
P04370	P04370	Mbp	Myelin basic protein	sp|P04370|MBP_MOUSE Myelin basic protein OS=Mus musculus OX=10090 GN=Mbp PE=1 SV=2	27.15	11	46	25.0462	25.4606	25.1497	25.5167	25.4784	25.2789	25.0577	24.8579	25.3385	25.2911	25.2104	23.8544	24.6308	25.1835	25.2864	25.0785	24.9486	24.558	25.1228	25.4395	24.0913	24.3118	24.4716	24.7029	23.744	25.8281	26.2485	25.9262	26.2998	26.2571	26.0612	25.8451	25.6482	26.1255	26.0824	26.0106	24.6771	25.4248	25.965	26.0812	25.8902	25.7502
P0C1Q2	P0C1Q2	Pde11a	Dual 3',5'-cyclic-AMP and -GMP phosphodiesterase 11A	sp|P0C1Q2|PDE11_MOUSE Dual 3',5'-cyclic-AMP and -GMP phosphodiesterase 11A OS=Mus musculus OX=10090 GN=Pde11a PE=1 SV=1	104.5	4	4.9	13.7472	14.5653	14.3042	14.1504	14.2053	14.0106	13.744	13.8735	13.8715	14.2497	13.8719	13.494	14.1073	13.9653	14.2038	13.3502	13.4555	13.6943	13.9036	13.5138	13.6852	13.6352	14.0682	13.8189	14.0372	12.2396	13.0637	12.7912	12.6441	12.6945	12.5034	12.2419	12.3743	12.369	12.7515	12.3825	12.0273	12.6118	12.4573	12.7091	11.8724	11.9677
Q3TXX3	Q3TXX3	Zfyve27	Protrudin	sp|Q3TXX3|ZFY27_MOUSE Protrudin OS=Mus musculus OX=10090 GN=Zfyve27 PE=1 SV=2	46.17	2	5.3	13.8253	14.0019	14.0274	13.9353	13.8796	13.8471	13.6879	13.9972	14.0835	14.2461	13.4037	13.3559	13.8237	14.077	13.9304	13.5445	13.615	13.7245	13.3647	13.5401	14.1414	14.0041	13.9248	14.1007	14.0933	14.0768	14.2593	14.2733	14.188	14.1278	14.0989	13.9449	14.257	14.34	14.507	13.6734	13.6481	14.0872	14.3279	14.1947	13.8257	13.8861
Q91VJ5	Q91VJ5	Pqbp1	Polyglutamine-binding protein 1	sp|Q91VJ5|PQBP1_MOUSE Polyglutamine-binding protein 1 OS=Mus musculus OX=10090 GN=Pqbp1 PE=1 SV=1	30.58	6	28.1	16.0184	16.093	16.2172	16.116	16.1815	16.0776	16.0444	16.3148	16.3579	16.1889	15.4598	15.4571	16.0287	15.8849	15.9206	16.2832	15.8196	16.2357	15.4568	15.9169	16.2618	16.3891	16.3152	16.3181	16.2834	16.6483	16.7288	16.8417	16.7472	16.8082	16.7079	16.6798	16.9531	16.9929	16.8282	16.108	16.1278	16.6707	16.5143	16.5634	16.9429	16.4693
Q922P9	Q922P9	Glyr1	Cytokine-like nuclear factor N-PAC	sp|Q922P9|GLYR1_MOUSE Cytokine-like nuclear factor N-PAC OS=Mus musculus OX=10090 GN=Glyr1 PE=1 SV=1	59.68	7	19.6	14.7663	15.0677	15.2649	15.2929	15.1116	15.199	15.1239	15.1292	15.4303	15.3764	14.3569	14.1923	15.0388	15.4344	15.3725	14.8288	14.809	14.5976	15.0688	14.9187	15.4604	15.2183	15.5915	15.3865	15.0114	13.9633	14.2706	14.4565	14.4911	14.3053	14.3964	14.3264	14.3345	14.6323	14.5828	13.5722	13.4301	14.2478	14.6309	14.5823	14.0555	14.0257
Q61712	Q61712	Dnajc1	DnaJ homolog subfamily C member 1	sp|Q61712|DNJC1_MOUSE DnaJ homolog subfamily C member 1 OS=Mus musculus OX=10090 GN=Dnajc1 PE=1 SV=1	63.83	2	3.4	14.8988	15.3952	14.7083	14.5001	14.2446	14.2919		14.7901	14.3846	14.4531	15.0443	14.3313	14.7114	14.5393	14.2972		14.0397	14.0647	14.1399	13.8996	14.5984	14.6726	13.9763		13.7977	14.0958	14.5982	13.8998	13.6983	13.4384	13.4892		13.9955	13.5866	13.6595	14.2595	13.5691	13.9205	13.7358	13.5071		13.2564
Q6ZQ88	Q6ZQ88	Kdm1a	Lysine-specific histone demethylase 1A	sp|Q6ZQ88|KDM1A_MOUSE Lysine-specific histone demethylase 1A OS=Mus musculus OX=10090 GN=Kdm1a PE=1 SV=2	92.79	9	12.4	13.2641	13.1017	13.4357	13.2918	13.3153	13.4336	13.0628	13.7863	13.658	13.829	12.6385	12.856	13.4109	13.0821	13.375	13.2045	13.0612	13.4756	12.7399	13.2009	13.2236	13.4318	13.6705	13.4092	13.4816	12.0066	11.8501	12.1727	12.0354	12.0545	12.1763	11.8107	12.5371	12.4055	12.5809	11.3991	11.6392	12.1654	11.8241	12.1303	11.9766	11.8234
Q9QY30	Q9QY30	Abcb11	Bile salt export pump	sp|Q9QY30|ABCBB_MOUSE Bile salt export pump OS=Mus musculus OX=10090 GN=Abcb11 PE=1 SV=2	146.66	2	1.9	14.0981	13.8789	13.3914	13.7577	13.1633	13.9887		14.0463	13.9644	13.2584	13.021	13.2346	13.0735	13.8025	13.7888	13.7217	13.4987	13.6459		12.8771	13.4832	13.5679	13.607	13.7288	13.1705	12.05	11.8367	11.3379	11.7109	11.1119	11.9409		12.0066	11.9213	11.2197	10.9912	11.2272	11.0374	11.7539	11.7535	11.7033	11.4703
O88602	O88602	Cacng2	Voltage-dependent calcium channel gamma-2 subunit	sp|O88602|CCG2_MOUSE Voltage-dependent calcium channel gamma-2 subunit OS=Mus musculus OX=10090 GN=Cacng2 PE=1 SV=1	35.87	3	11.8	16.8063	16.5373	16.0369	16.5472	16.2107	16.235	16.4202	17.1085	16.8244	16.9978	15.4622	16.2811	16.386	16.4028	16.6012	16.5796	16.4315	16.7462	15.6137	16.0944	16.6293	16.6743	16.4293	16.7316	16.7618	17.1732	16.9101	16.3984	16.9154	16.5744	16.6022	16.7926	17.4838	17.1963	17.3741	15.8474	16.6888	16.765	16.7693	16.981	16.9762	16.8181
Q7TSH6	Q7TSH6	Scaf4	SR-related and CTD-associated factor 4	sp|Q7TSH6|SCAF4_MOUSE SR-related and CTD-associated factor 4 OS=Mus musculus OX=10090 GN=Scaf4 PE=1 SV=1	128.97	2	1.5	12.2237	11.9666	12.4172	11.9998	11.8634			12.301	12.2314	12.087			12.1852	12.0208	12.0844	12.7822		12.0188	12.0021	11.4048	12.1884	12.4182	12.0943	11.9752	12.4553	11.3177	11.0665	11.5056	11.0949	10.954			11.4032	11.3303	11.1903			11.2912	11.1142	11.1911	11.9058
Q7TNE1	Q7TNE1	Sugct	Succinate--hydroxymethylglutarate CoA-transferase	sp|Q7TNE1|SUCHY_MOUSE Succinate--hydroxymethylglutarate CoA-transferase OS=Mus musculus OX=10090 GN=Sugct PE=1 SV=2	47.66	2	7.6	13.5208	13.545	13.2103	13.3702	13.366	13.6384	13.225	13.3681	13.3252	13.0304	13.2389	13.3329	13.2497	13.326	12.5742	13.3642	13.4779	12.5855	12.3614	12.9673	12.6179	12.1031	11.8066	12.6317	12.5571	13.0133	13.0433	12.6973	12.8639	12.8553	13.1312	12.7229	12.8689	12.8227	12.5323	12.7496	12.8661	12.7542	12.818	12.0794	12.8864	12.99
Q8VCL2	Q8VCL2	Sco2	Protein SCO2 homolog, mitochondrial	sp|Q8VCL2|SCO2_MOUSE Protein SCO2 homolog, mitochondrial OS=Mus musculus OX=10090 GN=Sco2 PE=1 SV=1	28.93	2	14.9	15.1921	15.0968	15.0257	15.2744	14.9395	14.919	14.8153	15.1337	15.1667	14.8149	14.8291	14.8281	14.8335	14.9176	15.1526	15.0272	14.1128	14.6855	14.3389	14.5318	14.8226	15.0065	14.6337	14.8542	14.994	15.3367	15.2472	15.1647	15.4202	15.0807	15.0638	14.9653	15.2866	15.3163	14.9689	14.9919	15.0135	14.9901	15.0617	15.3099	15.2014	14.277
Q3V1N5	Q3V1N5	Heca	Hdc homolog, cell cycle regulator	tr|Q3V1N5|Q3V1N5_MOUSE Hdc homolog, cell cycle regulator OS=Mus musculus OX=10090 GN=Heca PE=1 SV=1	59.08	5	11.4	12.4125	12.185	12.1707	12.4111	12.3602	12.0407	12.0464	12.2125	12.361	12.6174	12.0843	11.7363	12.176	12.0681	12.2349	12.24	11.3342	12.0527	12.1339	11.6393	11.9595	12.1044	12.3715	12.1889	12.086	11.8408	11.6192	11.5935	11.8406	11.7853	11.4694	11.4802	11.6492	11.7943	12.0551	11.5309	11.2054	11.6164	11.4959	11.676	11.698	10.7822
Q9CR39	Q9CR39	Wdr45b	WD repeat domain phosphoinositide-interacting protein 3	sp|Q9CR39|WIPI3_MOUSE WD repeat domain phosphoinositide-interacting protein 3 OS=Mus musculus OX=10090 GN=Wdr45b PE=1 SV=2	38	3	11	12.7905	13.0302	13.1643	12.9436	12.975	13.0681	13.0105	13.2162	13.0967	13.3938	13.1173	12.9763	13.0786	13.0572		13.0406	13.0954	13.301	12.8013	12.6149	13.2283	12.9234	12.984	12.9586	13.3687	13.1574	13.4031	13.5257	13.3118	13.3387	13.4354	13.3829	13.5915	13.4686	13.7701	13.5025	13.384	13.4576	13.4237		13.4373	13.482
A0A140T8T4	A0A140T8T4;P51410	Rpl9-ps6	Large ribosomal subunit protein uL6	tr|A0A140T8T4|A0A140T8T4_MOUSE Large ribosomal subunit protein uL6 OS=Mus musculus OX=10090 GN=Rpl9-ps6 PE=3 SV=1	21.84	5	35.9	19.2012	19.3852	19.6236	19.8049	19.7546	19.1584	19.2311	19.7573	19.6494	19.8356	18.5584	19.0853	19.3925	19.7472	19.2649	19.2448	19.3096	19.6053	19.354	18.7303	19.1123	19.1536	19.6064	19.5398	19.7302	19.9832	20.1731	20.4001	20.5881	20.5333	19.9407	20.0186	20.5476	20.4364	20.6269	19.3586	19.9081	20.1865	20.5287	20.0596	20.0565	20.1112
Q9JJF9	Q9JJF9	Sppl2a	Signal peptide peptidase-like 2A	sp|Q9JJF9|SPP2A_MOUSE Signal peptide peptidase-like 2A OS=Mus musculus OX=10090 GN=Sppl2a PE=1 SV=2	58.09	2	8.4	11.2252	10.8749	11.2414	11.0712		10.8731	10.8893	11.0352	11.1993	11.3603	10.3228	10.5262	11.0324	10.7939	10.9306	11.0406	10.5814	10.7345	10.8708		11.3201		11.1304	10.7837	10.9646	11.2702	10.9258	11.2809	11.1174		10.9184	10.9398	11.0886	11.2493	11.4147	10.3861	10.612	11.0894	10.8384	10.9884	11.1153	10.6461
Q6NVE9	Q6NVE9	Pptc7	Protein phosphatase PTC7 homolog	sp|Q6NVE9|PPTC7_MOUSE Protein phosphatase PTC7 homolog OS=Mus musculus OX=10090 GN=Pptc7 PE=1 SV=1	33.03	5	18.4	15.1784	15.1674	15.2974	15.4221	15.5803	15.0573	15.0585	15.5801	15.6751	15.7102	14.718	14.4468	15.2741	15.3695	15.4494	15.4893	14.6523	15.4036	14.9364	14.888	15.3585	15.3759	15.5451	15.541	15.6138	15.5453	15.5403	15.6589	15.7902	15.944	15.4246	15.4309	15.9554	16.0471	16.0865	15.1031	14.8546	15.6531	15.736	15.8291	15.886	15.0389
Q9JKF6	Q9JKF6	Nectin1	Nectin-1	sp|Q9JKF6|NECT1_MOUSE Nectin-1 OS=Mus musculus OX=10090 GN=Nectin1 PE=1 SV=3	57	5	15.5	16.4329	16.7909	16.7723	16.6894	16.5367	16.597	16.4889	16.9189	17.0865	17.1035	16.0238	15.9287	16.5856	16.6878	16.7841	16.4823	16.7833	16.6058	16.1949	16.2423	16.8893	16.831	16.8565	16.9957	17.2573	15.7999	16.1638	16.1338	16.0576	15.9004	15.9643	15.8613	16.2942	16.4585	16.4798	15.4089	15.3364	15.9646	16.0543	16.1639	15.879	16.1699
Q4VA53	Q4VA53	Pds5b	Sister chromatid cohesion protein PDS5 homolog B	sp|Q4VA53|PDS5B_MOUSE Sister chromatid cohesion protein PDS5 homolog B OS=Mus musculus OX=10090 GN=Pds5b PE=1 SV=1	164.32	13	11.2	14.0525	14.3366	14.705	14.6611	14.5944	14.5242	14.1784	14.2693	14.6766	14.4966	13.6823	13.1113	14.2451	14.8644	14.687	13.8569	14.0167	13.9753	14.6795	14.2791	14.7423	14.4438	14.8263	14.651	14.0812	11.7949	12.0849	12.442	12.4047	12.3336	12.2669	11.9263	12.0201	12.4241	12.2485	11.443	10.8946	11.9996	12.6063	12.4423	11.6291	11.7788
Q8BGF3	Q8BGF3	Dnaaf10	Dynein axonemal assembly factor 10	sp|Q8BGF3|DAA10_MOUSE Dynein axonemal assembly factor 10 OS=Mus musculus OX=10090 GN=Dnaaf10 PE=1 SV=1	39.77	2	6.2	12.9886	12.981	13.1969	13.0776	12.9073	12.9465	12.7628	12.9908	12.5637	12.9363	12.4555	12.3305	12.5182	12.7974	12.5499	12.5959	12.9383	12.7616	12.6647	12.6472	12.4769	12.2779	12.6287	12.6015	12.5604	12.6925	12.6909	12.8954	12.7827	12.608	12.6508	12.4722	12.7032	12.2727	12.6497	12.1777	12.0753	12.2342	12.5009	12.2666	12.3296	12.6619
P63030	P63030	Mpc1	Mitochondrial pyruvate carrier 1	sp|P63030|MPC1_MOUSE Mitochondrial pyruvate carrier 1 OS=Mus musculus OX=10090 GN=Mpc1 PE=1 SV=1	12.45	2	26.6	14.4191	14.8182	14.2499	14.7268	14.4624	14.3764	14.5852	14.9804	14.4856	15.1095	14.6712	14.2576	14.5557	14.2013	14.6589	14.7205	12.7898	14.1133	14.5259	14.6273	14.7188	14.4715	14.4257	14.6869	14.5031	15.786	16.191	15.6114	16.0949	15.8261	15.7436	15.9576	16.3557	15.8576	16.4858	16.0563	15.6654	15.9347	15.5677	16.0386	16.1172	14.1764
Q9D0D5	Q9D0D5	Gtf2e1	General transcription factor IIE subunit 1	sp|Q9D0D5|T2EA_MOUSE General transcription factor IIE subunit 1 OS=Mus musculus OX=10090 GN=Gtf2e1 PE=1 SV=1	49.56	4	12	11.7008	11.9448	12.0377	11.9663	11.8115	11.9077	11.8191	12.1188	12.3717	12.4262	11.6138	10.8341	11.6843	11.8849	11.898	11.9537	11.949	12.0298	11.8409	11.3262	12.0376	12.3071	12.1826	11.9953	12.2499	11.2604	11.5103	11.5918	11.527	11.3678	11.4676	11.3842	11.6868	11.9363	11.9952	11.1916	10.4344	11.2559	11.444	11.4703	11.543	11.5282
Q9CPR7	Q9CPR7	Sike1	Suppressor of IKBKE 1	sp|Q9CPR7|SIKE1_MOUSE Suppressor of IKBKE 1 OS=Mus musculus OX=10090 GN=Sike1 PE=1 SV=1	23.51	2	14	13.8699	13.7344	13.7195	13.9501	13.5836	13.7803	13.474	13.4851	13.8261	14.1538	13.4944	13.1812	13.8377	13.783	13.7339	13.5366	13.0383	13.4668	13.2268	13.1893	13.3827	13.3085	13.4788	13.684	13.5056	14.0145	13.8849	13.8585	14.0959	13.7249	13.9252	13.6241	13.638	13.9757	14.3077	13.6571	13.3666	13.9943	13.927	13.8912	13.7108	13.2025
Q8K353	Q8K353	Cystm1	Cysteine-rich and transmembrane domain-containing protein 1	sp|Q8K353|CYTM1_MOUSE Cysteine-rich and transmembrane domain-containing protein 1 OS=Mus musculus OX=10090 GN=Cystm1 PE=1 SV=1	11.39	2	10.6	17.8884	18.0189	17.8749	18.059	17.8346	17.6866	17.7913	17.9354	18.1403	18.0153	17.5395	17.4904	17.6249	17.8255	18.0039	17.8039	17.487	17.7174	17.3074	17.3627	16.9696	17.039	17.0391	17.16	17.027	20.8403	20.9767	20.8213	21.0121	20.7832	20.6389	20.7487	20.8957	21.0973	20.9766	20.5096	20.4831	20.5889	20.7769	20.9686	20.7856	20.4585
Q3UN16	Q3UN16	Gpr162	Probable G-protein coupled receptor 162	sp|Q3UN16|GP162_MOUSE Probable G-protein coupled receptor 162 OS=Mus musculus OX=10090 GN=Gpr162 PE=1 SV=2	64.11	4	8.3	15.5798	15.5397	15.5979	15.8978	15.6335	15.4935	15.6284	15.9825	15.901	16.0759	15.1225	15.3523	15.4145	15.5785	15.7553	15.5036	15.4473	15.3976	15.3881	15.2904	15.509	15.7699	15.6759	15.7402	15.934	14.7243	14.6902	14.737	15.0436	14.7748	14.6383	14.7784	15.1354	15.0506	15.2299	14.2853	14.5376	14.5711	14.7226	14.9126	14.6779	14.6115
Q8C3X2	Q8C3X2	Ccdc90b	Coiled-coil domain-containing protein 90B, mitochondrial	sp|Q8C3X2|CC90B_MOUSE Coiled-coil domain-containing protein 90B, mitochondrial OS=Mus musculus OX=10090 GN=Ccdc90b PE=1 SV=1	29.58	4	19.1	13.8053	13.835	14.2134	14.0157	13.7542	13.6052	13.6873	14.0407	14.0837	14.2088	13.1612	13.2815	13.8323	13.7955	14.0864	13.8177	13.4264	13.944	13.4629	13.3649	13.5077	13.6769	13.795	13.8379	13.7216	13.5872	13.6229	13.9899	13.7989	13.5329	13.3875	13.4747	13.8311	13.8707	14.0002	12.9614	13.1043	13.6263	13.5769	13.8812	13.6294	13.228
Q9DAX9	Q9DAX9	Appbp2	Amyloid protein-binding protein 2	sp|Q9DAX9|APBP2_MOUSE Amyloid protein-binding protein 2 OS=Mus musculus OX=10090 GN=Appbp2 PE=2 SV=1	66.81	3	5	11.8294	11.8523	12.0218	12.1714	11.9849	11.6842	12.1243	12.3292	12.2078	12.3036	11.6031	11.6983	11.8369	11.6162	11.7871	11.6607	11.6298	12.1352	11.9304	11.5354	10.6444	11.6632	11.9284	11.6206	12.1362	10.8744	10.9032	11.0613	11.2176	11.0266	10.7295	11.1748	11.3826	11.2579	11.358	10.6663	10.7841	10.894	10.6607	10.8449	10.7354	10.6945
Q8VDP6	Q8VDP6	Cdipt	CDP-diacylglycerol--inositol 3-phosphatidyltransferase	sp|Q8VDP6|CDIPT_MOUSE CDP-diacylglycerol--inositol 3-phosphatidyltransferase OS=Mus musculus OX=10090 GN=Cdipt PE=1 SV=1	23.58	3	16.4	18.1916	18.4022	18.4151	18.4528	18.334	18.3766	18.1854	18.6151	18.3172	18.58	17.795	17.6295	18.2521	18.3223	18.1976	18.4221	18.2087	18.4955	17.7117	17.7609	18.4752	18.142	17.6779	18.3925	18.6827	18.9736	19.1901	19.1916	19.236	19.1128	19.1589	18.9728	19.4054	19.1042	19.3713	18.5952	18.4522	19.0462	19.1038	18.9923	19.2338	19.0103
E9PZM7	E9PZM7	Scaf11	SR-related CTD-associated factor 11	tr|E9PZM7|E9PZM7_MOUSE SR-related CTD-associated factor 11 OS=Mus musculus OX=10090 GN=Scaf11 PE=1 SV=1	162	3	2.8	12.2076	12.4482	12.6445	12.5285	12.4248	12.413	12.1441	12.7398	12.6212	12.6034	11.9453	11.5746	12.4648	12.3451	12.5639	12.0659	12.4178	11.6547	12.4519	12.2188	12.4682	12.44	12.3612	12.3359	12.2645	10.5157	10.7621	10.9471	10.8378	10.7296	10.7214	10.4576	11.0562	10.9343	10.9209	10.2715	9.92339	10.7849	10.6527	10.8847	10.4037	10.7455
Q921U8	Q921U8	Smtn	Smoothelin	sp|Q921U8|SMTN_MOUSE Smoothelin OS=Mus musculus OX=10090 GN=Smtn PE=1 SV=2	100.23	5	5.7			12.4106				10.1074						9.98295	10.7795	10.9954				11.641	10.7371	11.1918	11.2309	11.1523	11.6465	10.9236			10.8976				8.60533						8.48746	9.27142	9.50064
Q03963	Q03963	Eif2ak2	Interferon-induced, double-stranded RNA-activated protein kinase	sp|Q03963|E2AK2_MOUSE Interferon-induced, double-stranded RNA-activated protein kinase OS=Mus musculus OX=10090 GN=Eif2ak2 PE=1 SV=2	58.24	2	4.7	14.0148	13.6136	13.7343	13.4562	13.6086	13.8937	13.6926	13.5303	14.1384	13.5694	13.1411	13.189	13.6195	13.6346	13.5893	13.4859	13.4948	12.9421	13.7154	13.3701	13.5926	13.4799	13.481	13.5193	13.1482	13.7188	13.3235	13.4328	13.1613	13.3094	13.598	13.4021	13.2426	13.8474	13.2827	12.8633	12.9337	13.3355	13.3381	13.306	13.2196	13.2185
Q9CQV7	Q9CQV7	Dnajc19	Mitochondrial import inner membrane translocase subunit TIM14	sp|Q9CQV7|TIM14_MOUSE Mitochondrial import inner membrane translocase subunit TIM14 OS=Mus musculus OX=10090 GN=Dnajc19 PE=1 SV=3	12.43	5	32.8	14.9173	15.1812	14.8449	15.0536	15.0333	14.8434	14.882	14.9739	15.1059	14.6308	14.6724	14.1464	14.6922	14.6166	15.0226	14.2508	14.6137	14.796	14.8794	14.7066	14.8893	14.7707	14.4307	14.6363	14.9507	15.6992	15.969	15.6214	15.8368	15.812	15.6256	15.6695	15.7642	15.8928	15.4222	15.4727	14.9692	15.4862	15.398	15.8174	15.0625	15.4153
Q9WTL7	Q9WTL7	Lypla2	Acyl-protein thioesterase 2	sp|Q9WTL7|LYPA2_MOUSE Acyl-protein thioesterase 2 OS=Mus musculus OX=10090 GN=Lypla2 PE=1 SV=1	24.78	5	25.1	18.4537	18.3944	18.4336	18.3741	18.5798	18.5726	18.3795	18.7082	18.812	18.7135	17.867	17.8709	18.4469	18.3257	18.5932	18.6319	18.2617	18.5932	17.6875	18.0744	18.4962	18.3912	18.4619	18.5622	18.754	18.8207	18.7673	18.7951	18.7423	18.9435	18.9398	18.7519	19.0835	19.1839	19.0899	18.2521	18.2787	18.8259	18.6921	18.973	19.0286	18.6483
Q5RJG7	Q5RJG7	Crppa	D-ribitol-5-phosphate cytidylyltransferase	sp|Q5RJG7|ISPD_MOUSE D-ribitol-5-phosphate cytidylyltransferase OS=Mus musculus OX=10090 GN=Crppa PE=2 SV=1	49.1	3	7.6	13.6323	13.8242	13.8505	14.2342	13.9213	13.5608	13.5858	14.3869	13.9305	14.1113	13.6002	13.2668	13.659	13.7556	13.8227	13.6283	13.3238	13.7124	13.4682	13.7331	13.4145	13.3496	13.799	13.7295	14.0087	13.1919	13.3897	13.4046	13.7949	13.4776	13.1207	13.1509	13.9548	13.4951	13.6803	13.178	12.8672	13.2306	13.3147	13.3951	13.2176	12.903
Q8QZY2	Q8QZY2	Glyctk	Glycerate kinase	sp|Q8QZY2|GLCTK_MOUSE Glycerate kinase OS=Mus musculus OX=10090 GN=Glyctk PE=1 SV=1	55.26	2	4	13.4657	13.5163	13.9448	13.915	13.9281	13.5589	13.6368	14.0268	13.85	14.2588	12.9961	12.9253	13.7725	13.7662	13.8207	13.7017	13.4919	14.0289	12.9609	13.5755	13.5026	13.0566	13.7634	13.6539	13.9201	13.3301	13.3866	13.8037	13.7807	13.7893	13.4236	13.5067	13.8996	13.7195	14.1326	12.8788	12.8305	13.649	13.6301	13.698	13.5959	13.376
Q9CS42	Q9CS42	Prps2	Ribose-phosphate pyrophosphokinase 2	sp|Q9CS42|PRPS2_MOUSE Ribose-phosphate pyrophosphokinase 2 OS=Mus musculus OX=10090 GN=Prps2 PE=1 SV=4	34.76	3	14.5	15.9267	16.155	16.0316	15.8372	15.7489	16.0489	16.0049	16.1975	16.2011	15.9775	15.0419	15.5928	16.1869	15.8322	15.7328	16.0575	16.3395	16.0666	14.9301	15.2899	15.6064	15.7916	15.605	15.5815	15.451	15.8786	16.1128	15.9781	15.7903	15.6975	16.0012	15.9623	16.1578	16.1581	15.9388	15.012	15.5855	16.1509	15.7836	15.6975	16.0391	16.3111
Q3TX08	Q3TX08	Trmt1	tRNA (guanine(26)-N(2))-dimethyltransferase	sp|Q3TX08|TRM1_MOUSE tRNA (guanine(26)-N(2))-dimethyltransferase OS=Mus musculus OX=10090 GN=Trmt1 PE=1 SV=2	72.3	3	4.4	13.3875	13.4076	13.6793	13.5196	13.5981	13.2482	13.291	13.7917	13.5463	13.5787	12.6601	12.7543	13.3081	13.4219	13.3871	12.9422	13.4383	13.719	13.2103	13.1494	13.2209	13.3584	13.6424	13.4292	13.7191	12.2519	12.278	12.5382	12.3852	12.4592	12.113	12.1609	12.6645	12.4158	12.4525	11.5427	11.6596	12.1845	12.2859	12.2644	11.8363	12.3224
P52734	P52734	Fgd1	FYVE, RhoGEF and PH domain-containing protein 1	sp|P52734|FGD1_MOUSE FYVE, RhoGEF and PH domain-containing protein 1 OS=Mus musculus OX=10090 GN=Fgd1 PE=1 SV=2	106.3	5	5.3	13.5825	13.624	13.5215	13.7403	13.6242	13.4626	13.4407	13.6623	13.6919	13.9639	13.1051	13.269	13.4297	13.3869	13.5313	13.6255	13.125	13.632	13.5043	12.6486	13.6139	13.6517	13.8557	13.6386	13.7053	11.8906	11.938	11.8241	12.0495	11.9289	11.771	11.7543	11.9787	12.0049	12.2813	11.4314	11.6178	11.7498	11.6944	11.8522	11.9633	11.4527
Q924X6	Q924X6	Lrp8	Low-density lipoprotein receptor-related protein 8	sp|Q924X6|LRP8_MOUSE Low-density lipoprotein receptor-related protein 8 OS=Mus musculus OX=10090 GN=Lrp8 PE=1 SV=2	109.75	3	2.8	12.5782	12.7153	12.8491	12.4937	12.575	12.7557	12.4807	12.8741	12.9595	13.044	12.2949	12.2094	12.1972	12.8934	12.7504	12.404	12.4184	12.7692	12.3477	11.9882	12.4813	12.5074	12.7341	12.5935	12.6118	10.7488	10.8918	11.0141	10.6655	10.7423	10.9265	10.6568	11.053	11.1351	11.2239	10.4837	10.4207	10.3798	11.0634	10.9337	10.6043	10.6086
Q9Z0M3	Q9Z0M3	Cdh20	Cadherin-20	sp|Q9Z0M3|CAD20_MOUSE Cadherin-20 OS=Mus musculus OX=10090 GN=Cdh20 PE=2 SV=1	88.94	2	3	13.6276	13.7993	13.3628	14.2028	13.8967	13.9679	13.8663	13.9798	13.8118	13.8542	13.4533	13.5115	13.5575	13.6672	13.539	13.8219	13.2723	13.7707	13.124	13.5997	13.8196	13.6129	12.9305	13.7628	13.7362	12.8246	13.0022	12.5544	13.401	13.0904	13.1653	13.0688	13.1852	13.0139	13.0606	12.6686	12.7493	12.7666	12.8637	12.7488	13.0486	12.489
Q8BZB2	Q8BZB2	Ppcdc	Phosphopantothenoylcysteine decarboxylase	sp|Q8BZB2|COAC_MOUSE Phosphopantothenoylcysteine decarboxylase OS=Mus musculus OX=10090 GN=Ppcdc PE=1 SV=1	22.33	3	19.6	12.3992	12.8481	13.0251	13.3153	12.611	13.0056	12.6981	13.1957	13.1402	12.6503	12.2751	12.0369	12.727	12.7851	12.7605	12.7036	12.6878	13.2419	11.9545	12.6669	12.1103	12.4771	12.6543	12.7273	13.1405	12.7662	13.2209	13.3866	13.6835	12.9747	13.3729	13.0705	13.571	13.5122	13.0267	12.6602	12.4446	13.106	13.1515	13.1403	13.1002	13.0744
Q8K124	Q8K124	Plekho2	Pleckstrin homology domain-containing family O member 2	sp|Q8K124|PKHO2_MOUSE Pleckstrin homology domain-containing family O member 2 OS=Mus musculus OX=10090 GN=Plekho2 PE=1 SV=1	53.84	5	10.7	12.5119	12.6119	13.1525	13.0599	13.0182	12.8255	12.6142	12.6103	12.9437	13.1053	12.1704	11.7736	12.8797	12.9566	12.8325	12.5808	12.452	12.3877	12.8341	12.5389	12.7534	12.5987	12.6581	12.7325	12.4989	11.9403	12.0462	12.5754	12.4894	12.4433	12.2542	12.048	12.0469	12.3771	12.543	11.6169	11.2427	12.3201	12.3844	12.2736	12.0389	11.9
Q6GQT5	Q6GQT5	Tmem151a	Transmembrane protein 151A	sp|Q6GQT5|T151A_MOUSE Transmembrane protein 151A OS=Mus musculus OX=10090 GN=Tmem151a PE=1 SV=1	51.28	3	7.3	12.3552	12.1906	12.2976	12.4187	12.1891	12.2922	12.0996	12.1531	12.6131	12.4528		12.0404	12.2396	12.1989	12.2064	12.4454	12.2517	12.5838	12.2956	12.3084	12.2057	12.3295	12.5041	12.3174	12.6862	11.7222	11.5635	11.659	11.7869	11.5528	11.6595	11.472	11.5283	11.985	11.8292		11.4481	11.6186	11.5654	11.5861	11.842	11.6383
Q8BHL3	Q8BHL3	Tbc1d10b	TBC1 domain family member 10B	sp|Q8BHL3|TB10B_MOUSE TBC1 domain family member 10B OS=Mus musculus OX=10090 GN=Tbc1d10b PE=1 SV=2	87.22	16	27.4	16.5361	16.7515	16.7274	16.8665	16.7509	16.6051	16.6496	16.7376	17.0099	16.9556	16.2877	15.7942	16.6025	16.8916	16.822	16.3022	16.457	16.32	16.605	16.4744	16.7529	16.7302	16.9601	16.9443	16.4529	15.6807	15.902	15.8664	16.0122	15.8922	15.7499	15.7996	15.8905	16.1594	16.1095	15.4505	14.9796	15.7591	16.0356	15.9793	15.4765	15.6213
Q9JLV2	Q9JLV2	Trpc4ap	Short transient receptor potential channel 4-associated protein	sp|Q9JLV2|TP4AP_MOUSE Short transient receptor potential channel 4-associated protein OS=Mus musculus OX=10090 GN=Trpc4ap PE=1 SV=2	90.67	4	5.3	13.2866	13.3965	13.3489	13.6662	13.1865	13.4641	13.1352	13.5708	13.6451	13.3946	12.8997	12.779	13.4654	13.4519	13.2905	13.1929	13.117	13.2371	13.0576	12.5769	12.9688	13.0536	13.2477		13.4045	11.8122	11.928	11.869	12.1931	11.7089	11.9901	11.6663	12.1048	12.1758	11.9296	11.4436	11.3454	12.0031	11.977	11.8289	11.7482	11.6623
Q3UPL5	Q3UPL5	Ag2	Uncharacterized protein C11orf96 homolog	sp|Q3UPL5|CK096_MOUSE Uncharacterized protein C11orf96 homolog OS=Mus musculus OX=10090 GN=Ag2 PE=1 SV=2	27.06	2	14.1	16.214	16.3947	16.5192	16.4588	16.3954	16.1529	16.4025	16.6024	16.2745	16.5968	15.5993	15.7409	16.3725	16.3878	16.6408	15.6694	16.491	16.4334	15.9049	15.7449	16.5159	16.6592	16.6127	16.7125	15.8587	16.844	17.0306	17.1437	17.09	17.0222	16.7832	17.0379	17.2407	16.9095	17.2362	16.2475	16.4116	17.0145	17.0173	17.2835	16.3291	17.1407
Q9D753	Q9D753	Exosc8	Exosome complex component RRP43	sp|Q9D753|EXOS8_MOUSE Exosome complex component RRP43 OS=Mus musculus OX=10090 GN=Exosc8 PE=1 SV=1	29.93	3	11.6	13.3908	13.5811	13.7374	13.6124	13.6632	13.4902	13.2127	13.6907	13.8236	13.7692	12.868	12.7408	13.5532	13.7561	13.5408	13.3197	13.8398	13.283	13.0539	12.991	13.4345	13.4017		13.4647	13.4957	13.8833	14.0794	14.2244	14.106	14.1524	13.983	13.7106	14.1915	14.3211	14.271	13.3787	13.2741	14.0577	14.2481	14.0461	13.8419	14.3519
Q8C8U0	Q8C8U0	Ppfibp1	Liprin-beta-1	sp|Q8C8U0|LIPB1_MOUSE Liprin-beta-1 OS=Mus musculus OX=10090 GN=Ppfibp1 PE=1 SV=3	108.47	2	2.1	12.2958	12.2999	12.6457	11.9931	11.8355	12.1058	11.928	12.3958	12.2379	12.2694	11.5765		12.1464	12.4556	12.5585	11.9811	11.7772	11.9258	12.4011	12.1966	12.3434	12.4278	12.2133	12.2423	11.9465	10.6931	10.7031	11.0376	10.3916	10.2296	10.5034	10.3308	10.8015	10.6402	10.6761	9.99205		10.5558	10.8524	10.9686	10.4081	10.1942
Q9CQA9	Q9CQA9	Ntpcr	Cancer-related nucleoside-triphosphatase homolog	sp|Q9CQA9|NTPCR_MOUSE Cancer-related nucleoside-triphosphatase homolog OS=Mus musculus OX=10090 GN=Ntpcr PE=1 SV=1	20.65	4	34.7	13.3557	13.2174	13.0746	13.2769	13.1621	13.3547	12.9443	13.3012	13.2376	12.9856	12.6439	12.325	12.8772	13.2448	13.3334	12.9352	13.0765	12.6215	12.9036	12.9281	13.468	13.411	13.1781	13.1691	12.7656	13.8482	13.7158	13.5616	13.7706	13.6513	13.8475	13.4422	13.802	13.7351	13.4875	13.1546	12.8582	13.3818	13.7368	13.8387	13.4574	13.5886
Q8CCK0	Q8CCK0	Macroh2a2	Core histone macro-H2A.2	sp|Q8CCK0|H2AW_MOUSE Core histone macro-H2A.2 OS=Mus musculus OX=10090 GN=Macroh2a2 PE=1 SV=3	40.07	8	23.9	16.1545	16.4898	16.7812	16.5819	16.4907	16.6364	16.407	16.4916	16.7876	16.7096	15.6006	15.8257	16.3774	17.0362	16.8105	16.2578	16.1115	15.8181	16.6283	16.0449	17.1194	17.1587	17.0075	17.2939	16.6027	15.8585	16.1997	16.4797	16.287	16.1914	16.3407	16.1165	16.204	16.4966	16.4229	15.3228	15.5705	16.0935	16.7396	16.5273	15.9915	15.8351
Q6IFT4	Q6IFT4	Arhgap20	Rho GTPase-activating protein 20	sp|Q6IFT4|RHG20_MOUSE Rho GTPase-activating protein 20 OS=Mus musculus OX=10090 GN=Arhgap20 PE=1 SV=1	131.29	2	1.8	11.5467	11.5703	11.6066	11.4743	11.2485	11.6352	11.5836	11.138	11.8044	11.5648	11.3296	11.2568	11.222	11.7248	11.3998	11.1434	11.3358	11.0534	10.8757	10.8165	11.4942	11.5892	11.5208	11.6345	11.299	9.94397	9.97352	9.99847	9.87284	9.64256	10.0328	9.98639	9.54364	10.2067	9.97146	9.74519	9.69485	9.63133	10.1216	9.80992	9.57045	9.75281
Q9QYE9	Q9QYE9	Plekhb1	Pleckstrin homology domain-containing family B member 1	sp|Q9QYE9|PKHB1_MOUSE Pleckstrin homology domain-containing family B member 1 OS=Mus musculus OX=10090 GN=Plekhb1 PE=1 SV=1	27.32	2	13.2	17.3102	17.7822	17.5219	17.8153	17.8041	17.5373	17.4643	17.3568	17.7676	17.5127	16.9852	16.785	17.4041	17.4638	17.5829	17.3339	17.4757	17.5121	17.0546	17.2618	15.8751	16.2462	16.168	16.6085	16.3124	17.8026	18.2805	18.0089	18.3089	18.2934	18.0301	17.9622	17.8576	18.2651	18.0145	17.4959	17.3183	17.9087	17.9557	18.0882	17.856	17.9878
Q9D1E5	Q9D1E5	Lmbr1l	Protein LMBR1L	sp|Q9D1E5|LMBRL_MOUSE Protein LMBR1L OS=Mus musculus OX=10090 GN=Lmbr1l PE=1 SV=1	54.92	2	4.1	12.1057	12.3966	12.4388	12.6107	12.7601	12.4848	12.0821	12.8872	12.5069	12.9028	11.9322	12.4549	12.4651	12.7434	12.5709	12.3869		12.3846	12.2535	11.7475	12.3089	11.6787	11.9279	12.0408	12.283	12.1507	12.4476	12.4783	12.6569	12.8019	12.5301	12.1326	12.9406	12.5569	12.9572	11.9955	12.5407	12.5222	12.7879	12.6287	12.4616
D3Z3Y1	D3Z3Y1	Pigg	GPI ethanolamine phosphate transferase 2	tr|D3Z3Y1|D3Z3Y1_MOUSE GPI ethanolamine phosphate transferase 2 OS=Mus musculus OX=10090 GN=Pigg PE=1 SV=1	108.44	6	6.4	12.9474	12.8227	13.4072	13.0581	12.6393	12.8607	12.7948	13.0981	13.3764	13.3239	12.156	12.5277	12.7821	13.0342	13.0898	12.7391	12.7201	13.1769	12.8651	12.2312	13.0309	12.7711	13.219	12.9398	13.0449	11.5774	11.4586	12.0316	11.6892	11.266	11.491	11.4303	11.7365	12.0114	11.9632	10.8042	11.1985	11.4241	11.6637	11.7326	11.3988	11.3697
Q9D4H9	Q9D4H9	Phf14	PHD finger protein 14	sp|Q9D4H9|PHF14_MOUSE PHD finger protein 14 OS=Mus musculus OX=10090 GN=Phf14 PE=1 SV=2	105.88	4	4.7	11.5859	11.9905	11.6455	11.5862	11.2898	11.9355	11.925	11.975	11.7521	11.5131	11.5339	10.8631	11.7427	11.5655	12.0625	11.5262	11.1085	11.0863	11.5309	11.1742	12.1297	11.9206	12.1506	11.587	11.589	10.2524	10.6629	10.3065	10.2539	9.95305	10.6023	10.597	10.6498	10.4236	10.189	10.2187	9.57041	10.4212	10.2315	10.7418	10.2224	9.79472
P28574	P28574	Max	Protein max	sp|P28574|MAX_MOUSE Protein max OS=Mus musculus OX=10090 GN=Max PE=1 SV=2	18.23	2	11.9	12.1315	11.9187	12.1054	12.0767	11.8837	11.7643	11.977	12.0808	12.4206	12.0634	11.6869	11.7702	11.8763	11.8538	12.0263	11.817	11.4435	11.9184	11.6042	11.4216	11.6847	11.7978	12.1523	12.1069	12.2802	12.7615	12.5546	12.7299	12.7079	12.5104	12.3946	12.6124	12.7192	13.0556	12.7027	12.3351	12.441	12.5183	12.4833	12.669	12.4767	12.0932
Q03147	Q03147	Cdk7	Cyclin-dependent kinase 7	sp|Q03147|CDK7_MOUSE Cyclin-dependent kinase 7 OS=Mus musculus OX=10090 GN=Cdk7 PE=1 SV=2	38.94	5	17.6	13.8586	13.9078	13.9724	14.1314	14.028	14.3167	13.8687	14.5206	14.0693	14.4411	13.1922	13.5301	13.8955	14.1577	14.4964	13.9319	13.873	14.1747	13.1724	13.689	14.0596	13.7973	14.1203	14.2151	14.4659	13.5626	13.6177	13.6709	13.8366	13.7288	14.021	13.5781	14.2329	13.7783	14.1544	12.9144	13.2748	13.6115	13.8612	14.2132	13.6656	13.5966
Q8K387	Q8K387	Usp45	Ubiquitin carboxyl-terminal hydrolase 45	sp|Q8K387|UBP45_MOUSE Ubiquitin carboxyl-terminal hydrolase 45 OS=Mus musculus OX=10090 GN=Usp45 PE=1 SV=1	90.3	5	10	11.3233	11.8758	12.4421	12.1605	12.1231	12.3098	11.8972	11.5172	12.181	12.6179	11.3662	12.0267	12.2185	11.7976	12.0108	11.5301	11.8448	12.0611	10.9768	11.6137	11.6534	11.5886	11.5295	11.1459	10.6554	9.91766	10.476	11.031	10.7561	10.7142	10.9045	10.4971	10.1199	10.7804	11.2217	9.9788	10.6618	10.8249	10.3914	10.618	10.1542	10.4589
Q9QWH1	Q9QWH1	Phc2	Polyhomeotic-like protein 2	sp|Q9QWH1|PHC2_MOUSE Polyhomeotic-like protein 2 OS=Mus musculus OX=10090 GN=Phc2 PE=1 SV=1	89.74	2	2.8	14.1356	14.3491	14.5708	14.3252	14.2524	14.0249	13.862	14.2178	14.3039	14.3017	13.9326	13.4214	14.3448	14.3905	13.8265	14.054	14.1005	14.0421	13.765	13.465	14.1911	14.3594	14.3	14.114	13.9906	12.9176	13.137	13.3473	13.1084	13.0311	12.8072	12.6495	13.0081	13.0909	13.093	12.7328	12.2442	13.1388	13.172	12.6213	12.8657	12.9021
Q9JLC4	Q9JLC4	Sorcs1	VPS10 domain-containing receptor SorCS1	sp|Q9JLC4|SORC1_MOUSE VPS10 domain-containing receptor SorCS1 OS=Mus musculus OX=10090 GN=Sorcs1 PE=1 SV=1	129.55	2	2.2	13.0238	12.7035	12.2537	12.5327	12.6175	12.8764	12.819	13.1728	13.2299	13.1423	12.3193	12.1757	12.5253	12.8929	12.9072	12.8204	12.7344	12.7026	12.5872	11.7076	13.0356	12.6471	12.2645	12.5524	12.4488	11.3033	10.9889	10.5277	10.8134	10.8937	11.1562	11.104	11.4606	11.5144	11.4311	10.617	10.496	10.8168	11.1719	11.1995	11.1296	11.0336
P62281	P62281	Rps11	Small ribosomal subunit protein uS17	sp|P62281|RS11_MOUSE Small ribosomal subunit protein uS17 OS=Mus musculus OX=10090 GN=Rps11 PE=1 SV=3	18.42	3	11.4	15.5421	15.9232	16.2161	15.9484	16.009	15.5702	15.5119	16.0403	16.1156	16.2929	15.1461	15.155	15.6778	16.1739	15.9126	15.3082	15.5363	16.0946	15.7363	15.4319	15.7169	15.8335	16.2378	16.2072	16.3169	16.1721	16.559	16.8405	16.5796	16.6357	16.2005	16.1473	16.6787	16.7505	16.9322	15.7943	15.8258	16.3198	16.8034	16.5554	15.9679	16.186
Q8BSZ2	Q8BSZ2	Ap3s2	AP-3 complex subunit sigma-2	sp|Q8BSZ2|AP3S2_MOUSE AP-3 complex subunit sigma-2 OS=Mus musculus OX=10090 GN=Ap3s2 PE=1 SV=1	22	2	9.8	15.2746	15.4052	15.4357	15.36	15.3681	15.2454	15.2042	15.3397	15.3798	15.5911	14.9703	14.9188	15.0828	15.1576	15.1497	15.3412	15.1318	15.2751	14.7256	14.8551	15.3601	14.8331	15.1796	15.0005	15.1	16.0566	16.1931	16.2122	16.1432	16.1469	16.0277	15.9916	16.13	16.1668	16.3825	15.7705	15.7416	15.8768	15.939	15.9444	16.1529	15.9335
Q9CQV5	Q9CQV5	Mrps24	Small ribosomal subunit protein uS3m	sp|Q9CQV5|RT24_MOUSE Small ribosomal subunit protein uS3m OS=Mus musculus OX=10090 GN=Mrps24 PE=1 SV=1	18.89	3	26.3	12.8731	12.6102	13.0881	12.9137	12.8773	12.0541	12.1325	13.1827	13.2449	13.7329	12.3571	11.9461	12.8629	13.0897	13.1214	12.868	11.71	12.845	12.2295	12.6896	12.8942	13.1108	13.0161	13.0312	13.3342	13.5031	13.2461	13.7125	13.5449	13.504	12.6844	12.768	13.821	13.8799	14.3722	13.0053	12.6169	13.5049	13.7192	13.7641	13.5277	12.3597
Q6EDY6	Q6EDY6	Carmil1	F-actin-uncapping protein LRRC16A	sp|Q6EDY6|CARL1_MOUSE F-actin-uncapping protein LRRC16A OS=Mus musculus OX=10090 GN=Carmil1 PE=1 SV=2	151.76	10	10.2	15.5305	15.8099	16.0089	16.1578	15.9372	16.0549	15.7556	16.0088	16.1591	16.1788	15.2484	15.202	15.8724	16.2739	16.0999	15.5739	15.4814	15.6176	15.8667	15.3773	16.273	15.7525	16.4327	16.2719	15.8366	13.3125	13.5978	13.7854	13.941	13.7159	13.8372	13.5431	13.7992	13.9461	13.9702	13.0486	13.0248	13.6664	14.0554	13.8947	13.3856	13.2831
A2AIL4	A2AIL4	Ndufaf6	NADH dehydrogenase (ubiquinone) complex I, assembly factor 6	sp|A2AIL4|NDUF6_MOUSE NADH dehydrogenase (ubiquinone) complex I, assembly factor 6 OS=Mus musculus OX=10090 GN=Ndufaf6 PE=1 SV=1	38.34	2	5.4	13.5881	13.9947	13.7298	13.8253	13.5575	13.8613	14.0321	13.6667	13.4778	13.8802	13.3828	14.043	13.3361	13.4704	13.3877	13.2767	13.7144	13.4745	13.5302	13.0098	13.2833	12.9844	13.3094	12.9505	13.0898	13.54	13.9525	13.6763	13.7784	13.5062	13.8136	13.9895	13.6269	13.4347	13.8415	13.3529	14.0357	13.3001	13.4218	13.3524	13.2583	13.686
Q9DB72	Q9DB72	Btbd17	BTB/POZ domain-containing protein 17	sp|Q9DB72|BTBDH_MOUSE BTB/POZ domain-containing protein 17 OS=Mus musculus OX=10090 GN=Btbd17 PE=1 SV=1	52.57	6	19	14.879	14.6369	14.6888	14.9761	15.1383	14.8076	14.7675	15.1788	15.0417	15.3328	14.2711	14.6059	14.8366	14.9834	14.9846	14.2445	14.5946	14.8098	14.6823	14.4475	15.0994	15.1772	15.4824	15.5325	15.0872	14.1871	13.9509	13.9913	14.2853	14.4431	14.116	14.0811	14.4952	14.3548	14.6502	13.5974	13.9548	14.1567	14.291	14.3054	13.5823	13.9224
Q8BZ94	Q8BZ94	Zmat4	Zinc finger matrin-type protein 4	sp|Q8BZ94|ZMAT4_MOUSE Zinc finger matrin-type protein 4 OS=Mus musculus OX=10090 GN=Zmat4 PE=2 SV=1	25.65	2	13.1	13.7278	13.7196	13.7031	14.1849	14.0734	13.6631	13.753	13.9852	13.8468	14.2531	13.2153	13.7939	13.7575	13.6969	13.8254	13.3358	13.3373	13.7701	13.4061	13.785	13.7831	14.0728	13.5661	13.88	13.9609	14.0948	14.0925	14.0646	14.553	14.4371	14.0304	14.1254	14.3604	14.2188	14.6294	13.6005	14.2016	14.1364	14.0633	14.2051	13.7324	13.7239
Q69Z99	Q69Z99	Znf512	Zinc finger protein 512	sp|Q69Z99|ZN512_MOUSE Zinc finger protein 512 OS=Mus musculus OX=10090 GN=Znf512 PE=2 SV=2	63.87	9	16.2	13.9505	14.0716	14.0663	14.094	13.9229	14.092	14.0178	14.1943	14.2013	14.3596	13.5801	13.1036	13.6067	14.1225	14.1854	13.9865	13.811	13.772	13.9991	13.8192	14.2743	14.3004	14.2207	14.3588	13.8182	13.3174	13.4445	13.4278	13.4621	13.2866	13.4593	13.3902	13.5696	13.5733	13.7359	12.9653	12.5113	12.9857	13.4889	13.5651	13.3831	13.1976
Q91YI4	Q91YI4	Arrb2	Beta-arrestin-2	sp|Q91YI4|ARRB2_MOUSE Beta-arrestin-2 OS=Mus musculus OX=10090 GN=Arrb2 PE=1 SV=1	46.28	5	10.7	14.8635	14.9938	15.1003	15.0722	14.8743	15.0062	14.95	15.2581	15.1994	15.2881	14.2144	14.4287	15.1033	14.9357	15.0349	14.9593	15.0602	15.2522	14.2213	14.4116	14.8066	15.2218	15.2454	15.1867	15.3036	14.4231	14.5593	14.6544	14.633	14.4306	14.5661	14.5151	14.826	14.764	14.857	13.7922	14.0291	14.6749	14.4948	14.6073	14.5486	14.6395
P27038	P27038	Acvr2a	Activin receptor type-2A	sp|P27038|AVR2A_MOUSE Activin receptor type-2A OS=Mus musculus OX=10090 GN=Acvr2a PE=1 SV=1	57.85	2	4.9	10.3323	10.5581	11.1643		10.5818	10.4788	10.322	11.4335		11.4861	10.257		10.4127	11.1316	10.7112	10.2996	10.2456	10.7512		10.0826	11.0661	10.1492	11.1449	11.1933	10.9193	9.58378	9.81551	10.4103		9.83001	9.73053	9.57898	10.6933		10.7469	9.52669		9.67619	10.3826	9.97544	9.5808	9.51675
Q8R2R9	Q8R2R9	Ap3m2	AP-3 complex subunit mu-2	sp|Q8R2R9|AP3M2_MOUSE AP-3 complex subunit mu-2 OS=Mus musculus OX=10090 GN=Ap3m2 PE=1 SV=1	46.89	5	19.9	16.016	16.266	16.3951	16.3462	16.2796	16.2755	16.2886	16.4984	16.354	16.6018	15.8932	15.8015	16.1114	16.3031	16.1406	16.0478	16.0624	16.1849	16.2282	15.5661	16.3898	16.1424	16.3276	16.3344	16.2649	15.5084	15.7644	15.882	15.8399	15.7689	15.7683	15.7865	15.9992	15.8515	16.1037	15.4039	15.3348	15.6159	15.7951	15.6458	15.57	15.5746
Q3TYD4	Q3TYD4	Arsg	Arylsulfatase G	sp|Q3TYD4|ARSG_MOUSE Arylsulfatase G OS=Mus musculus OX=10090 GN=Arsg PE=1 SV=1	57.4	4	9.1	14.0105	14.2213	14.3824	14.2373	14.3663	13.9723	13.9963	13.8407	14.3906	14.1409	13.4952	12.9872	14.236	14.2008	14.3308	14.2826	13.8919	14.2013	13.5639	13.3933	13.096	13.4811	13.4823	13.2896	13.6346	13.3775	13.5942	13.7438	13.6054	13.73	13.3396	13.3687	13.216	13.7626	13.5172	12.8804	12.3949	13.615	13.5673	13.7106	13.6793	13.2785
Q6PEB6	Q6PEB6	Mob4	MOB-like protein phocein	sp|Q6PEB6|PHOCN_MOUSE MOB-like protein phocein OS=Mus musculus OX=10090 GN=Mob4 PE=1 SV=1	26.02	4	31.1	17.5854	17.2667	17.3049	16.9263	17.1071	17.1243	17.2235	17.7004	17.4095	17.5008	17.3798	16.7646	17.1236	16.8598	17.3318	17.254	17.0308	17.1606	16.7201	16.5526	17.4677	17.4046	17.041	16.908	16.9285	18.0779	17.7651	17.7919	17.42	17.5963	17.6171	17.7214	18.2012	17.907	18.0026	17.8905	17.2979	17.6281	17.3517	17.8371	17.7762	17.543
Q61624	Q61624	Znf148	Zinc finger protein 148	sp|Q61624|ZN148_MOUSE Zinc finger protein 148 OS=Mus musculus OX=10090 GN=Znf148 PE=1 SV=2	88.7	5	6.3	13.3042	13.4409	13.4429	13.6299	13.2461	13.2599	13.2808	13.6282	13.5852	13.7073	12.7515	12.7163	13.3816	13.5055	13.5308	13.206	12.7699	13.3812	13.1798	13.1319	13.61	13.6206	13.7084	13.6773	13.6989	12.1687	12.3113	12.3018	12.4955	12.1073	12.1247	12.1507	12.501	12.4547	12.5812	11.6341	11.6215	12.2581	12.3694	12.408	12.1002	11.654
Q99J25	Q99J25	Mrm1	rRNA methyltransferase 1, mitochondrial	sp|Q99J25|MRM1_MOUSE rRNA methyltransferase 1, mitochondrial OS=Mus musculus OX=10090 GN=Mrm1 PE=2 SV=2	34.82	2	5.6	13.9622	14.1725		14.5998		14.5056	14.2592	14.9645			13.7705	13.5986	14.3811	14.6227		14.5526		14.5717			14.6284	14.6412	14.3389	14.5594		13.6661	13.8824		14.305		14.2099	13.9687	14.6768			13.4927	13.3434	14.0971	14.3262		14.2863
Q8BQP8	Q8BQP8	Rab11fip4	Rab11 family-interacting protein 4	sp|Q8BQP8|RFIP4_MOUSE Rab11 family-interacting protein 4 OS=Mus musculus OX=10090 GN=Rab11fip4 PE=1 SV=1	71.86	4	8.5	13.2501	13.284	13.5141	13.4434	13.2277	13.1784	13.0949	13.5572	13.5919	13.7989	12.8108	12.8661	13.0079	13.24	13.3884	13.0742	13.1057	13.3816	13.1845	12.9124	13.447	12.8335	13.2975	13.3715	13.1364	12.202	12.2418	12.4605	12.3965	12.1764	12.1306	12.0523	12.5174	12.5488	12.7601	11.7809	11.8588	11.9718	12.1914	12.3531	12.0558	12.0773
Q99PM9	Q99PM9	Uck2	Uridine-cytidine kinase 2	sp|Q99PM9|UCK2_MOUSE Uridine-cytidine kinase 2 OS=Mus musculus OX=10090 GN=Uck2 PE=1 SV=1	29.39	3	13.8	13.3609	13.447	13.6843	13.6421	13.4972	13.3129	12.9516	13.7819	13.7223	13.8215	13.1654	13.5011		13.5607	13.5558	13.2031	13.4198	13.7384	13.6493	13.6612	13.2415	13.4812	13.7451	13.8418	14.2348	13.6123	13.7044	13.9303	13.8948	13.7455	13.5647	13.2085	14.0417	13.9788	14.0824	13.4351	13.7933		13.8116	13.8201	13.4843	13.6909
Q8CIA5	Q8CIA5	Slc35b4	Nucleotide sugar transporter SLC35B4	sp|Q8CIA5|S35B4_MOUSE Nucleotide sugar transporter SLC35B4 OS=Mus musculus OX=10090 GN=Slc35b4 PE=2 SV=2	37.49	2	6.3	16.0884	16.1305	16.201	15.9454	16.0395	15.733	15.7506	16.349	16.1125	16.4495	15.8401	15.9306	15.5333	16.0438	15.5943	15.7468	15.7793	16.0172	15.8982	15.4499	15.6137	15.7034	15.5852	15.7976	15.9785	16.7184	16.7664	16.8255	16.5766	16.6662	16.3633	16.386	16.9874	16.7475	17.0889	16.4883	16.6014	16.1753	16.6732	16.2371	16.4065	16.4289
Q91YY4	Q91YY4	Atpaf2	ATP synthase mitochondrial F1 complex assembly factor 2	sp|Q91YY4|ATPF2_MOUSE ATP synthase mitochondrial F1 complex assembly factor 2 OS=Mus musculus OX=10090 GN=Atpaf2 PE=1 SV=1	33.27	3	15.2	14.7789	14.7674	15.0893	14.6726	15.0952	14.4714	14.7814	15.0897	14.683	14.9588	14.6326	14.1496	14.7584	14.6612	14.8677	14.6797	14.3053	14.6461	14.3481	14.3774	14.2044	14.5116	14.3056	14.1176	14.1526	14.8239	14.8183	15.1288	14.7189	15.137	14.5168	14.8319	15.1431	14.733	15.0132	14.6959	14.2354	14.8154	14.7057	14.9255	14.7544	14.37
P10853	P10853;P10854;Q64475;Q64478;Q64525;Q6ZWY9;Q8CGP1;Q8CGP2	H2bc15	Histone H2B type 1-F/J/L	sp|P10853|H2B1F_MOUSE Histone H2B type 1-F/J/L OS=Mus musculus OX=10090 GN=H2bc15 PE=1 SV=2	13.93	5	38.1	18.8333	19.048	19.4688	19.4318	19.5272	19.353	19.24	19.0753	19.6297	19.6196	19.0223	18.1166	18.9713	19.5392	19.632	18.9304	18.6722	18.744	19.4586	19.1788	19.0687	19.0277	19.5443	19.6534	18.5198	19.9779	20.1985	20.6079	20.5776	20.6685	20.4978	20.39	20.2282	20.7793	20.7735	20.1851	19.302	20.1279	20.6832	20.7894	20.1047	19.8364
Q8R2S9	Q8R2S9	Actr8	Actin-related protein 8	sp|Q8R2S9|ARP8_MOUSE Actin-related protein 8 OS=Mus musculus OX=10090 GN=Actr8 PE=2 SV=1	70.5	2	3.4	12.1437	12.5058	12.6485	12.5579	12.8201	12.3617	12.0366	12.662	12.5405	12.6764	11.6862	12.148	12.1966	12.5525	12.7811	12.2006	11.8327	12.1598	12.0887	12.3544	12.1344	12.3834	12.5302	12.3679	12.7009	11.2376	11.6057	11.7369	11.653	11.9108	11.4559	11.136	11.7643	11.6394	11.7797	10.7984	11.2827	11.3026	11.6459	11.8879	11.3243	10.9463
Q61216	Q61216	Mre11	Double-strand break repair protein MRE11	sp|Q61216|MRE11_MOUSE Double-strand break repair protein MRE11 OS=Mus musculus OX=10090 GN=Mre11 PE=1 SV=1	80.17	4	5.9	13.1632	13.2736	13.2007	13.2852	13.3358	13.0464	13.0444	13.4873	13.0233	13.697	12.848	12.5427	13.1008	13.0082	13.1628	13.078	13.1669	12.9964	13.0864	12.6185	13.4788	12.8551	12.759	12.7598	13.2296	12.0707	12.1871	12.1027	12.194	12.24	11.9542	11.9574	12.4032	11.9358	12.6139	11.7738	11.491	12.0204	11.9152	12.0831	12.0152	12.0941
Q91XA2	Q91XA2	Golm1	Golgi membrane protein 1	sp|Q91XA2|GOLM1_MOUSE Golgi membrane protein 1 OS=Mus musculus OX=10090 GN=Golm1 PE=1 SV=2	44.3	2	5.3	11.6897	12.346	12.346	12.2081	12.0884	11.3076	11.4809	11.6542	12.4365	12.2971	11.7178	11.4906	11.5531	11.9912	12.3656	11.122	10.7635	12.1292	11.732	12.0427		11.4692	12.3054	12.1485	11.8912	11.1181	11.7803	11.7688	11.6376	11.5135	10.7363	10.9147	11.0909	11.8699	11.7348	11.1644	10.9597	10.9935	11.419	11.8068	10.5801	10.2115
A6H650	A6H650	Rasgef1a	RasGEF domain family, member 1A	tr|A6H650|A6H650_MOUSE RasGEF domain family, member 1A OS=Mus musculus OX=10090 GN=Rasgef1a PE=1 SV=1	54.84	4	8.3	13.9353	13.892	14.256	14.526	14.2433	13.94	14.1544	14.4242	14.2848	14.2708	13.6391	14.3398	13.879	14.2916	14.2965	13.9276	13.8021	13.9531	13.3342	13.5177	13.9754	13.7761	14.0536	14.07	14.3044	13.2433	13.2059	13.5586	13.8353	13.5481	13.2484	13.468	13.7406	13.5978	13.5882	12.9653	13.6886	13.1991	13.5991	13.6174	13.2654	13.1298
Q68EF8	Q68EF8	Rapgefl1	Rap guanine nucleotide exchange factor-like 1	sp|Q68EF8|RPGFL_MOUSE Rap guanine nucleotide exchange factor-like 1 OS=Mus musculus OX=10090 GN=Rapgefl1 PE=1 SV=2	73.65	8	14.5	14.5872	15.0243	15.0469	15.2929	15.287	15.0595	14.9887	15.0874	15.2409	15.4919	14.4634	14.3777	15.07	15.0472	15.037	14.8376	14.8396	14.9312	14.9447	14.6146	14.8863	14.7385	15.5345	15.0248	14.9315	13.4947	13.9377	13.949	14.2016	14.1913	13.9673	13.9017	14.0033	14.1534	14.4088	13.3891	13.326	13.9896	13.9542	13.9573	13.7748	13.7668
Q5SU73	Q5SU73	Coil	Coilin	sp|Q5SU73|COIL_MOUSE Coilin OS=Mus musculus OX=10090 GN=Coil PE=1 SV=1	61.88	6	12.8	13.3284	13.553	13.7379	14.0849	13.9431	13.7239	13.6043	14.0414	14.1395	14.173	12.9672	13.1938	13.7484	14.0663	14.2649	13.5138	13.4112	13.2467	13.627	13.3521	13.9943	13.5834	13.9927	14.0109	13.706	12.6364	12.867	13.0405	13.3942	13.2479	13.0323	12.9178	13.3578	13.4526	13.4905	12.2935	12.5426	13.0685	13.3738	13.5857	12.8516	12.7389
P19258	P19258	Mpv17	Protein Mpv17	sp|P19258|MPV17_MOUSE Protein Mpv17 OS=Mus musculus OX=10090 GN=Mpv17 PE=1 SV=1	19.67	4	29	14.6963	14.4455	14.614	14.6219	14.5371	14.3131	14.296	14.4556	14.6592	14.6518	14.0299	13.8172	14.2496	14.5845	14.6946	14.4826	14.1333	14.0749	14.3753	13.912	14.0799	14.2962	13.9957	14.1434	13.6986	15.8408	15.596	15.7531	15.7676	15.6784	15.4579	15.446	15.6085	15.8088	15.8057	15.1927	15.0025	15.4062	15.7286	15.852	15.6569	15.2975
Q8BHK2	Q8BHK2	Scn3b	Sodium channel subunit beta-3	sp|Q8BHK2|SCN3B_MOUSE Sodium channel subunit beta-3 OS=Mus musculus OX=10090 GN=Scn3b PE=1 SV=1	24.77	2	9.8	17.0448	16.9292	16.8323	17.0354	16.7118	17.0552	16.863	17.1088	17.3703	16.8846	16.2055	16.6329	16.9086	16.7298	16.8993	16.9616	16.9095	16.645	16.4705	16.5428	17.0604	17.0422	17.0644	17.1227	17.3612	17.6748	17.565	17.4568	17.6665	17.3386	17.6855	17.4985	17.7471	18.0053	17.524	16.8537	17.3037	17.5506	17.3592	17.542	17.6213	17.5591
P59108	P59108	Cpne2	Copine-2	sp|P59108|CPNE2_MOUSE Copine-2 OS=Mus musculus OX=10090 GN=Cpne2 PE=1 SV=1	61	4	8	14.9091	15.5444	16.0743	15.5695	15.6072	15.6883	15.2977	15.2886	15.5055	15.6848	15.095	14.566	15.3807	15.4904	15.7173	14.681	15.602	15.0996	15.7838	14.8238	15.5749	15.5968	15.6836	15.157	15.6874	14.3374	14.9786	15.4972	14.9991	15.0323	15.117	14.7316	14.7253	14.9389	15.1225	14.5416	14.0352	14.8211	14.9183	15.1584	14.1391	15.05
Q9EQJ0	Q9EQJ0	Tpcn1	Two pore calcium channel protein 1	sp|Q9EQJ0|TPC1_MOUSE Two pore calcium channel protein 1 OS=Mus musculus OX=10090 GN=Tpcn1 PE=1 SV=1	94.43	3	4.7	13.0583	13.2144	13.4458	13.022	13.1176	13.0927	12.9019	13.3271	13.3888	13.5549	12.5323	12.5689	13.0566	13.2627	13.0924	13.2127	13.1004	13.0838	12.7769	12.5116	13.0198	13.2403	13.2364	13.0739	12.9307	12.2554	12.4174	12.6373	12.2203	12.3114	12.29	12.1044	12.5325	12.5909	12.7613	11.7476	11.8067	12.2657	12.4592	12.3022	12.4394	12.317
Q9EPK6	Q9EPK6	Sil1	Nucleotide exchange factor SIL1	sp|Q9EPK6|SIL1_MOUSE Nucleotide exchange factor SIL1 OS=Mus musculus OX=10090 GN=Sil1 PE=1 SV=2	52.4	3	7.3	12.1928	12.0334	13.4379	12.2468	11.7336	11.6217	11.6247	11.7717	12.2969	11.853	11.4202	11.8444	11.542	12.0421	12.2865	11.8009	11.7251	11.6824	12.33	11.2188	12.3348	12.5898	12.2877	11.6479	11.1473	11.8228	11.6693	13.0624	11.878	11.3604	11.252	11.2602	11.4101	11.9319	11.4924	11.0684	11.5152	11.184	11.6716	11.9293	11.4606	11.3747
Q9CQX2	Q9CQX2	Cyb5b	Cytochrome b5 type B	sp|Q9CQX2|CYB5B_MOUSE Cytochrome b5 type B OS=Mus musculus OX=10090 GN=Cyb5b PE=1 SV=1	16.31	3	41.1	18.2568	18.3612	17.933	18.397	18.4108	18.2726	18.3368	18.251	18.0881	18.6946	18.1678	18.1172	17.9351	17.5543	18.3564	18.807	18.3482	18.2742	17.1761	17.3456	17.0346	17.4308	17.4932	17.3876	17.5726	19.6237	19.7341	19.2944	19.7652	19.7745	19.6399	19.7092	19.6263	19.4601	20.071	19.5529	19.5249	19.3141	18.9207	19.7361	20.2037	19.7348
Q8BUY8	Q8BUY8	Gprasp2	G-protein coupled receptor-associated sorting protein 2	sp|Q8BUY8|GASP2_MOUSE G-protein coupled receptor-associated sorting protein 2 OS=Mus musculus OX=10090 GN=Gprasp2 PE=1 SV=2	92.74	9	14.3	15.1142	15.208	15.1296	15.3633	15.056	15.0978	14.9982	15.4862	15.4197	15.4435	14.4477	14.4858	15.087	15.3627	15.2673	15.1146	15.0801	15.1566	14.7164	14.6787	15.379	15.3749	15.442	15.4583	15.294	14.0217	14.1214	14.0316	14.272	13.9602	14.0056	13.9112	14.4021	14.3323	14.3604	13.3734	13.434	14.0065	14.2697	14.1876	14.0519	14.0073
Q9Z2H2	Q9Z2H2	Rgs6	Regulator of G-protein signaling 6	sp|Q9Z2H2|RGS6_MOUSE Regulator of G-protein signaling 6 OS=Mus musculus OX=10090 GN=Rgs6 PE=1 SV=2	54.5	6	18.6	16.4694	16.3924	16.3326	16.6989	16.7383	16.3716	16.2895	17.0223	16.7756	17.0002	15.6542	15.8206	16.4467	16.854	16.6461	16.6515	16.4161	16.7173	15.9565	16.0097	16.8295	16.5156	16.535	16.9573	16.7913	16.029	15.9579	15.8867	16.2597	16.2946	15.9315	15.8546	16.5902	16.3402	16.5692	15.232	15.421	16.0183	16.4131	16.2185	16.2408	15.9954
P21761	P21761	Trhr	Thyrotropin-releasing hormone receptor	sp|P21761|TRHR_MOUSE Thyrotropin-releasing hormone receptor OS=Mus musculus OX=10090 GN=Trhr PE=2 SV=1	44.53	3	8.9			12.4146			12.9858		12.8173	12.0147	12.9714		12.1435		12.7051	12.3664						12.8824	12.8101	12.7002					12.5537			13.1307		12.9702	12.1642	13.1254		12.3288		12.8491	12.5237
Q5XJY4	Q5XJY4	Parl	Presenilin-associated rhomboid-like protein, mitochondrial	sp|Q5XJY4|PARL_MOUSE Presenilin-associated rhomboid-like protein, mitochondrial OS=Mus musculus OX=10090 GN=Parl PE=1 SV=1	41.94	3	11.1	12.6173	12.4792	12.4809	12.5546	11.8157	11.72	12.5734	12.5118	12.5477	11.9591	11.641	11.4232		12.2429	12.9003	12.417	11.556	12.38	11.76	11.7541	12.1501	12.4086	11.7438	12.4359	12.1955	12.5692	12.437	12.4273	12.5077	11.7643	11.6723	12.5308	12.472	12.5047	11.9204	11.6111	11.4159		12.1943	12.865	12.3987	11.5275
P45481	P45481	Crebbp	Histone lysine acetyltransferase CREBBP	sp|P45481|CBP_MOUSE Histone lysine acetyltransferase CREBBP OS=Mus musculus OX=10090 GN=Crebbp PE=1 SV=3	265.32	7	3.2	12.268	12.3596	12.5478	12.3249	12.2928	12.4944	12.3588	12.7236	12.3751	12.7843	11.4257	11.8544	12.4606	12.1796	12.5281	12.4954	12.3431	12.4593	12.1242	11.7592	12.6208	12.695	12.5527	12.4867	12.5463	9.91609	10.0136	10.1904	9.97428	9.93767	10.1428	10.0124	10.3801	10.0282	10.4418	9.09207	9.54328	10.1208	9.82722	10.1891	10.1732	10.0109
Q8K1H1	Q8K1H1	Tdrd7	Tudor domain-containing protein 7	sp|Q8K1H1|TDRD7_MOUSE Tudor domain-containing protein 7 OS=Mus musculus OX=10090 GN=Tdrd7 PE=1 SV=1	122.1	5	6.1	12.7968	13.7021	13.685	13.27	13.4799	13.2348				13.6287			13.4927	13.2511	13.734	13.3884		13.3572		13.1642	13.2161	12.7057		13.2945		10.6402	11.5514	11.5229	11.1146	11.32	11.0785				11.4815			11.3482	11.0939	11.5902	11.2615
Q5SYH2	Q5SYH2	Tmem199	Transmembrane protein 199	sp|Q5SYH2|TM199_MOUSE Transmembrane protein 199 OS=Mus musculus OX=10090 GN=Tmem199 PE=1 SV=1	23.08	4	23.1	14.0447	14.1755	14.2894	14.2217	14.2558	14.1389	13.9418	14.3409	14.3199	14.5538	13.5026	13.6928	14.1911	14.1715	14.3213	13.9535	13.9351	14.2909	13.6504	13.676	14.1858	14.1436	14.2681	14.1667	14.4714	14.5372	14.6739	14.7763	14.7154	14.7451	14.6317	14.4397	14.8417	14.8174	15.0557	14.0133	14.2261	14.6956	14.6635	14.8266	14.4757	14.4472
P63056	P63056	Olfm3	Noelin-3	sp|P63056|NOE3_MOUSE Noelin-3 OS=Mus musculus OX=10090 GN=Olfm3 PE=1 SV=1	54.85	4	9	13.5522	13.2018	13.2583	14.2959	14.1883	13.5845	13.5992	14.6772	14.0824	14.5711	12.861	13.7532	13.6353	13.9657	13.8636	13.4793	13.343	13.9856	13.7801	13.4487	14.0658	13.5726	13.6619	13.8667	14.1344	12.9806	12.636	12.6812	13.7254	13.6134	13.0132	13.033	14.1139	13.5158	14.0088	12.3076	13.2223	13.0756	13.3935	13.3047	12.9374	12.791
Q9CPS8	Q9CPS8		Small membrane A-kinase anchor protein	sp|Q9CPS8|SMAKA_MOUSE Small membrane A-kinase anchor protein OS=Mus musculus OX=10090 PE=1 SV=1	11.92	2	25.5	14.7509	15.3329	14.4772	14.6456	14.3402	14.4854	14.4927	14.8625	14.9185	14.3898	14.2451	14.267	14.2854	14.2459	14.8397	14.6309	14.8749	14.2312	13.9779	14.2022	12.6252	14.2822	11.4575	14.4112	11.9778	16.7028	17.2907	16.4236	16.5987	16.2888	16.4376	16.4501	16.8228	16.8754	16.3511	16.2153	16.2597	16.2493	16.1973	16.8044	16.6125	16.8465
Q6P8M1	Q6P8M1	Tatdn1	Deoxyribonuclease TATDN1	sp|Q6P8M1|TATD1_MOUSE Deoxyribonuclease TATDN1 OS=Mus musculus OX=10090 GN=Tatdn1 PE=1 SV=1	33.34	3	13.9	13.6303	13.8299	13.8135	13.7417	14.0388	13.751	13.5943	13.8299	13.996	14.1877	13.6339		13.6992	13.8132	14.131	13.5175	13.73	13.883	13.7858	13.7258	13.6711	13.6771	13.562	13.5716	13.5035	13.4123	13.6177	13.59	13.5249	13.8176	13.5333	13.3817	13.6202	13.783	13.9791	13.4341		13.4932	13.5947	13.9258	13.3292	13.5316
Q9WU22	Q9WU22	Ptpn4	Tyrosine-protein phosphatase non-receptor type 4	sp|Q9WU22|PTN4_MOUSE Tyrosine-protein phosphatase non-receptor type 4 OS=Mus musculus OX=10090 GN=Ptpn4 PE=1 SV=2	105.76	4	4.1	12.5739	12.3832	12.6405	12.7142	12.6003	12.1411	12.0015	12.7848	12.6618	12.9293	11.7797	12.0301	12.2607	12.6193	12.5643	12.3297	12.4737	12.3546	12.2533	11.8709	12.5463	12.5734	12.7294	12.6382	12.9364	11.0023	10.8175	11.0634	11.1438	11.0254	10.5698	10.4353	11.2215	11.0952	11.3671	10.2262	10.4992	10.7011	11.0471	11.0055	10.7877	10.9218
Q9CR25	Q9CR25	Dph2	2-(3-amino-3-carboxypropyl)histidine synthase subunit 2	sp|Q9CR25|DPH2_MOUSE 2-(3-amino-3-carboxypropyl)histidine synthase subunit 2 OS=Mus musculus OX=10090 GN=Dph2 PE=1 SV=1	52.33	2	5.3	14.7659		14.8225	14.775	14.5779	14.8964	14.6455	14.8413	14.9154	14.646		14.3958	14.6688	14.8675	14.6994	14.81	14.5535	14.776	14.1476	13.9804	14.7758	14.8349	14.4423	14.6058	14.6924	14.2583		14.3095	14.2687	14.0671	14.3892	14.1435	14.3421	14.4129	14.1478		13.9291	14.1734	14.3595	14.2046	14.3322	14.0656
Q62141	Q62141	Sin3b	Paired amphipathic helix protein Sin3b	sp|Q62141|SIN3B_MOUSE Paired amphipathic helix protein Sin3b OS=Mus musculus OX=10090 GN=Sin3b PE=1 SV=2	126.33	8	7.7	13.2025	13.3884	13.5092	13.6452	13.5851	13.3918	13.3957	13.8334	13.7951	13.8132	13.0309	12.9504	13.5298	13.6015	13.3885	13.4497	13.2549	13.3942	12.9329	13.1346	13.4113	13.4489	13.8471	13.7418	13.7052	11.2237	11.4155	11.5248	11.6676	11.603	11.4133	11.4223	11.8629	11.8213	11.8438	11.0703	11.0124	11.563	11.6222	11.4224	11.5006	11.2958
Q91VC7	Q91VC7	Ppp1r14a	Protein phosphatase 1 regulatory subunit 14A	sp|Q91VC7|PP14A_MOUSE Protein phosphatase 1 regulatory subunit 14A OS=Mus musculus OX=10090 GN=Ppp1r14a PE=1 SV=1	16.64	5	46.3	14.5132	14.7856	14.6662	15.0928	14.8586	14.4445	14.5379	14.9434	15.322	14.9095	13.9831	13.8672	14.3411	15.0473	14.8973	14.5994	14.4694	14.8082	14.4721	14.6976	14.2736	14.0642	14.302	14.8668	14.5472	16.1432	16.4215	16.2907	16.724	16.4853	16.0748	16.1733	16.5817	16.957	16.5489	15.6313	15.538	15.9831	16.6767	16.54	16.2591	16.1191
Q9R020	Q9R020	Zranb2	Zinc finger Ran-binding domain-containing protein 2	sp|Q9R020|ZRAB2_MOUSE Zinc finger Ran-binding domain-containing protein 2 OS=Mus musculus OX=10090 GN=Zranb2 PE=1 SV=2	37.33	5	14.5	14.8157	14.8788	14.9216	14.9476	14.8589	14.6716	14.8369	15.4401	15.2915	15.3307	13.9612	14.3802	15.0142	14.9424	14.9228	14.8757	14.8994	14.8741	14.5273	14.7056	15.0233	15.14	15.0064	15.4348	15.3889	14.5977	14.6667	14.6981	14.7308	14.6376	14.4539	14.6244	15.2304	15.0785	15.122	13.7614	14.203	14.8082	14.7238	14.7176	14.6874	14.701
Q9R062	Q9R062	Gyg1	Glycogenin-1	sp|Q9R062|GLYG_MOUSE Glycogenin-1 OS=Mus musculus OX=10090 GN=Gyg1 PE=1 SV=3	37.38	5	18.9	16.9644	17.0748	17.2194	16.8801	16.9127	17.0219	16.8551	16.9362	16.9605	17.182	16.4733	16.6473	16.9369	16.7155	16.8764	16.8365	17.025	17.0007	16.4287	16.1776	16.402	16.5589	16.642	16.4905	16.8016	17.4569	17.5732	17.7064	17.3738	17.4019	17.5147	17.353	17.4371	17.458	17.6839	16.984	17.1806	17.4414	17.2074	17.3817	17.3586	17.5372
Q9DBZ5	Q9DBZ5	Eif3k	Eukaryotic translation initiation factor 3 subunit K	sp|Q9DBZ5|EIF3K_MOUSE Eukaryotic translation initiation factor 3 subunit K OS=Mus musculus OX=10090 GN=Eif3k PE=1 SV=1	25.07	4	28	17.5678	17.5537	17.7248	17.7233	17.7426	17.5766	17.5451	17.8356	17.8317	17.9449	17.2593	17.028	17.5889	17.5516	17.7303	17.6711	17.7429	17.7953	16.9605	16.8304	17.7125	17.5041	17.6146	17.5804	17.6161	18.0603	18.052	18.2117	18.217	18.2318	18.0693	18.0431	18.3364	18.3292	18.4468	17.77	17.5613	18.0934	18.0436	18.2356	18.1933	18.2551
Q7TSH4	Q7TSH4	Ccp110	Centriolar coiled-coil protein of 110 kDa	sp|Q7TSH4|CP110_MOUSE Centriolar coiled-coil protein of 110 kDa OS=Mus musculus OX=10090 GN=Ccp110 PE=1 SV=1	111.07	6	8.9	12.5145	12.6086	12.9269	13.124	12.8881	12.7549	12.4131	12.7683	13.1753	13.0245	12.3726	11.5863	12.7197	13.0802	12.8838	12.4747	12.5205	12.6252	12.4206	12.6281	12.7161	12.7572	13.023	12.8937	12.5591	10.7385	10.8385	11.1454	11.3492	11.1089	10.9792	10.6425	11.0007	11.4043	11.2578	10.6148	9.85103	10.9558	11.3037	11.1206	10.7284	10.7642
Q9D883	Q9D883	U2af1	Splicing factor U2AF 35 kDa subunit	sp|Q9D883|U2AF1_MOUSE Splicing factor U2AF 35 kDa subunit OS=Mus musculus OX=10090 GN=U2af1 PE=1 SV=4	27.8	4	21.8	17.733	17.6204	17.8407	17.9597	17.777	17.6463	17.5593	17.961	18.1553	18.0826	16.8327	16.9095	17.6578	17.7842	17.9529	17.7495	17.5905	17.9265	17.4345	17.6128	17.6499	17.8016	18.0042	18.0338	17.9465	18.2255	18.1188	18.3277	18.4534	18.2662	18.139	18.0573	18.4618	18.6528	18.5845	17.3434	17.4428	18.1624	18.2762	18.4582	18.2717	18.1026
Q6Q477	Q6Q477	Atp2b4	Plasma membrane calcium-transporting ATPase 4	sp|Q6Q477|AT2B4_MOUSE Plasma membrane calcium-transporting ATPase 4 OS=Mus musculus OX=10090 GN=Atp2b4 PE=1 SV=1	132.98	11	14.4	18.8571	18.8308	18.8197	19.0863	19.0187	19.2793	18.9384	19.7119	19.1721	19.8281	18.4352	18.3753	18.581	19.7774	19.1884	18.3372	19.0716	19.0349	18.8421	19.0176	19.8885	18.9734	19.1239	19.3024	19.2267	17.224	17.2037	17.1812	17.4544	17.3824	17.6466	17.3109	18.0872	17.5441	18.2044	16.8204	16.7831	16.96	18.1439	17.5682	16.7338	17.4582
P55088	P55088	Aqp4	Aquaporin-4	sp|P55088|AQP4_MOUSE Aquaporin-4 OS=Mus musculus OX=10090 GN=Aqp4 PE=1 SV=2	34.41	6	17.6	19.2187	19.2637	19.466	19.3292	19.2628	19.0926	19.146	19.2325	19.6228	19.5935	18.6551	18.3703	19.3134	19.2405	19.4456	19.3283	19.0148	19.3955	18.8839	18.7001	18.8976	18.7994	18.9972	19.0233	19.2744	20.1706	20.2215	20.4124	20.2823	20.2114	20.0449	20.1034	20.1928	20.5797	20.5548	19.6252	19.363	20.2774	20.1919	20.4103	20.3099	19.9864
O88456	O88456	Capns1	Calpain small subunit 1	sp|O88456|CPNS1_MOUSE Calpain small subunit 1 OS=Mus musculus OX=10090 GN=Capns1 PE=1 SV=2	28.39	10	52.2	18.172	18.3688	18.4385	18.6275	18.3391	18.3463	18.2545	18.4925	18.5694	18.5342	17.9994	17.7169	18.2735	18.5294	18.4969	17.853	17.6532	17.9778	18.3906	18.3728	18.1133	18.0663	18.5179	18.4779	17.975	18.6645	18.8672	18.9255	19.1212	18.8284	18.8391	18.7525	18.9933	19.0669	19.0361	18.5101	18.2502	18.778	19.0214	19.0022	18.3751	18.1653
O35691	O35691	Pnn	Pinin	sp|O35691|PININ_MOUSE Pinin OS=Mus musculus OX=10090 GN=Pnn PE=1 SV=4	82.39	17	26.3	15.2295	15.3679	15.5221	15.6879	15.4548	15.2886	15.3483	15.5967	15.6795	15.7867	14.8582	14.6731	15.2913	15.6646	15.451	15.0233	14.9607	15.1508	15.5325	15.4802	15.6462	15.5112	16.0248	15.7918	15.4442	14.137	14.2813	14.4242	14.5966	14.359	14.1965	14.2613	14.5126	14.592	14.7036	13.7839	13.6214	14.2109	14.5716	14.3713	13.9605	13.8878
Q9Z315	Q9Z315	Sart1	U4/U6.U5 tri-snRNP-associated protein 1	sp|Q9Z315|SNUT1_MOUSE U4/U6.U5 tri-snRNP-associated protein 1 OS=Mus musculus OX=10090 GN=Sart1 PE=1 SV=1	90.83	9	14.3	14.4025	14.6391	14.7773	14.9098	14.6786	14.4946	14.505	14.8371	14.9706	15.0453	14.0191	13.8631	14.6001	14.8731	14.8171	14.5421	14.2757	14.4383	14.502	14.4627	14.7157	14.8622	14.9474	15.0603	14.8153	13.1065	13.349	13.4757	13.615	13.3793	13.1989	13.2144	13.5494	13.6796	13.7587	12.7413	12.6079	13.3161	13.5766	13.5339	13.2758	12.9993
A2ALW2	A2ALW2	Zkscan16	Zinc finger with KRAB and SCAN domains 16	tr|A2ALW2|A2ALW2_MOUSE Zinc finger with KRAB and SCAN domains 16 OS=Mus musculus OX=10090 GN=Zkscan16 PE=1 SV=1	83.77	2	2.3	12.9387	12.9967	13.2508	13.4569	13.3504	13.31	12.8922	13.4677	13.3762	13.8614	12.4144	12.4984	13.0186	13.2025	13.8096	12.815	13.1581	13.2695	13.0574	12.7917	13.089	12.6646	13.4148	13.0811	13.1455	11.6812	11.7451	11.9878	12.2006	12.0896	12.0527	11.6401	12.2185	12.1237	12.6132	11.1751	11.2817	11.7731	11.9444	12.5649	11.5872	11.9202
Q9CR60	Q9CR60	Golt1b	Vesicle transport protein GOT1B	sp|Q9CR60|GOT1B_MOUSE Vesicle transport protein GOT1B OS=Mus musculus OX=10090 GN=Golt1b PE=1 SV=1	15.41	3	24.6	14.6175	14.6094	14.7262	14.6022	14.1311	14.5346	14.6151	14.8141	14.6263	14.7428	13.7945	13.7367	14.3607	14.7374	14.61	14.7209	14.6302	14.8909	13.9395	13.7331	14.8089	14.911	14.9753	14.98	14.8625	15.9844	15.9823	16.0876	15.9704	15.4948	15.9019	15.9875	16.1894	15.9982	16.1192	15.1797	15.1444	15.7397	16.1038	15.9897	16.1176	16.0169
Q9DCE5	Q9DCE5	Pak1ip1	p21-activated protein kinase-interacting protein 1	sp|Q9DCE5|PK1IP_MOUSE p21-activated protein kinase-interacting protein 1 OS=Mus musculus OX=10090 GN=Pak1ip1 PE=1 SV=2	42.09	2	4.5	14.0716	14.0597	14.244	14.1317	14.0728	13.9098	13.7613	14.3724	14.2502	14.4842	13.5738	13.7713	14.0083	14.012	13.7512	13.5652	14.0141	14.1417	14.0058	13.6493	13.912	13.5804	13.9937	13.9784	14.3526	13.5	13.494	13.6668	13.5612	13.4979	13.3385	13.1951	13.8091	13.6835	13.922	13.0204	13.2404	13.4487	13.4398	13.1923	13.0233	13.4621
Q61923	Q61923	Kcna6	Potassium voltage-gated channel subfamily A member 6	sp|Q61923|KCNA6_MOUSE Potassium voltage-gated channel subfamily A member 6 OS=Mus musculus OX=10090 GN=Kcna6 PE=1 SV=1	58.64	2	3.8	15.4977	15.5771	15.5344	15.6748	15.6968	15.6322	15.3962	15.6744	15.7649	16.0237	14.9671	15.0224	15.3821	15.5628	15.625	15.2408	15.6574	15.6948	15.1438	15.3144	15.1542	15.3	15.363	15.4583	15.5943	14.9901	15.0755	15.0214	15.1685	15.186	15.125	14.8942	15.1752	15.2624	15.5256	14.4778	14.5557	14.8866	15.0547	15.1302	14.763	15.1695
Q9QX60	Q9QX60	Dguok	Deoxyguanosine kinase, mitochondrial	sp|Q9QX60|DGUOK_MOUSE Deoxyguanosine kinase, mitochondrial OS=Mus musculus OX=10090 GN=Dguok PE=1 SV=3	32.26	2	14.1	14.7379	14.7783	14.8357	14.8419	14.7351	14.7021	14.881	15.258	15.1905	15.2936	14.2265	14.3692	14.744	14.6839	14.8686	14.8566	14.8057	15.0215	14.4583	14.3586	14.7353	14.5748	14.8763	14.8767	14.8929	15.1048	15.1511	15.1971	15.2101	15.0988	15.0693	15.2534	15.6332	15.5624	15.67	14.6117	14.7769	15.123	15.0504	15.2484	15.2533	15.1924
Q8R0X2	Q8R0X2	Cacul1	CDK2-associated and cullin domain-containing protein 1	sp|Q8R0X2|CACL1_MOUSE CDK2-associated and cullin domain-containing protein 1 OS=Mus musculus OX=10090 GN=Cacul1 PE=2 SV=1	42.08	2	5.6	13.5339	13.3718	13.7988	13.3377	13.212	13.2604	13.4864	13.5085	13.6684	13.5621	13.2417	13.1641	13.573	13.5239	13.4103	13.2339	12.7989	13.2009	13.0355	12.6996	12.8078	13.3794	13.4682	13.022	13.6333	13.3159	13.1597	13.5753	13.1209	12.9907	13.0427	13.2739	13.2988	13.4554	13.3535	13.0419	12.9869	13.367	13.3054	13.2051	13.0456	12.6006
Q80SY5	Q80SY5	Prpf38b	Pre-mRNA-splicing factor 38B	sp|Q80SY5|PR38B_MOUSE Pre-mRNA-splicing factor 38B OS=Mus musculus OX=10090 GN=Prpf38b PE=1 SV=1	63.71	4	6.8	14.4916	14.1752	14.6461	14.7834	14.4597	14.2449	13.9049	14.9273	14.9555	14.8771	13.9278	13.5475	14.267	14.712	14.6779	14.3149	13.7992	14.4737	14.3561	14.5349	14.854	14.8864	15.0198	14.9001	14.853	14.356	14.0456	14.5051	14.6491	14.3209	14.1096	13.7748	14.8001	14.825	14.7509	13.8105	13.4528	14.1435	14.5759	14.5552	14.2091	13.6833
B9EJ80	B9EJ80	Pdzd8	PDZ domain-containing protein 8	sp|B9EJ80|PDZD8_MOUSE PDZ domain-containing protein 8 OS=Mus musculus OX=10090 GN=Pdzd8 PE=1 SV=1	127.66	14	13.9	14.8399	15.0268	15.2385	15.2767	15.2282	15.0491	14.9691	15.0965	15.3095	15.3407	14.6824	14.247	15.0466	15.301	15.2238	14.6821	14.6645	14.7013	15.1182	14.8584	15.3145	14.9807	15.4291	15.2903	15.0756	13.0104	13.2033	13.4036	13.4484	13.3955	13.2199	13.1451	13.2754	13.4851	13.5207	12.8712	12.4584	13.2292	13.4711	13.4071	12.8823	12.8547
Q8CG03	Q8CG03	Pde5a	cGMP-specific 3',5'-cyclic phosphodiesterase	sp|Q8CG03|PDE5A_MOUSE cGMP-specific 3',5'-cyclic phosphodiesterase OS=Mus musculus OX=10090 GN=Pde5a PE=1 SV=2	98.34	2	3	11.877	10.9774	12.1173	11.817	11.5918	11.4694	11.4474	12.1636	11.6778	12.1358	10.9746	10.6044	11.7659	12.0216	11.6421	11.5207	10.8762	11.8748	11.3483	11.7963	11.2007	11.2486	11.6353	11.7564	11.7254	10.244	9.35027	10.4787	10.1851	9.95547	9.83663	9.81977	10.5389	10.0498	10.5121	9.35982	9.01216	10.1449	10.388	10.0218	9.91737	9.26283
P97433	P97433	Arhgef28	Rho guanine nucleotide exchange factor 28	sp|P97433|ARG28_MOUSE Rho guanine nucleotide exchange factor 28 OS=Mus musculus OX=10090 GN=Arhgef28 PE=1 SV=2	190.37	8	6.1	13.8227	13.9104	13.8887	13.7192	13.7395	13.737	13.8663	13.7266	13.9976	14.0516	13.3814	13.5751	13.7486	13.5424	13.7782	13.6736	13.53	13.7314	13.505	13.1616	13.4402	13.6168	13.8485	13.7233	13.8788	11.5078	11.6014	11.5683	11.4055	11.4214	11.4225	11.5569	11.4201	11.6878	11.7461	11.0848	11.301	11.4458	11.227	11.4761	11.3885	11.2347
Q62147	Q62147	Sspn	Sarcospan	sp|Q62147|SSPN_MOUSE Sarcospan OS=Mus musculus OX=10090 GN=Sspn PE=1 SV=1	23.84	2	9.7	12.2122	12.5409	12.231	12.1434	12.4683	12.5064	12.35	11.979	12.5484	12.5264	11.9792	11.5867	12.1381	12.4733	12.3749	12.3054	12.5485	12.0903	11.5242	11.6579	11.8724	11.4525	11.9962	12.1489		13.1641	13.4987	13.1774	13.0965	13.417	13.4586	13.3074	12.9392	13.5054	13.4876	12.9493	12.5794	13.1021	13.4247	13.3397	13.287	13.5201
P62754	P62754	Rps6	Small ribosomal subunit protein eS6	sp|P62754|RS6_MOUSE Small ribosomal subunit protein eS6 OS=Mus musculus OX=10090 GN=Rps6 PE=1 SV=1	28.66	8	26.9	18.0741	18.0483	18.5488	18.4765	18.0064	18.5042	18.3553	18.5363	18.6969	18.421	17.8131	17.6257	18.4187	18.797	18.6692	17.9431	17.6837	18.0981	18.0739	17.7188	19.3102	19.0558	18.8983	19.0738	18.8633	19.026	19.0061	19.4952	19.4296	18.9551	19.4564	19.3127	19.4965	19.6538	19.3823	18.7832	18.6184	19.3827	19.7484	19.6339	18.9247	18.6553
E9QAE3	E9QAE3	Btaf1	B-TFIID TATA-box binding protein associated factor 1	tr|E9QAE3|E9QAE3_MOUSE B-TFIID TATA-box binding protein associated factor 1 OS=Mus musculus OX=10090 GN=Btaf1 PE=1 SV=1	206.92	4	3.4	13.2404	13.7501	13.8383	13.6197	13.3071	13.2616	13.3812	13.7669	13.7772	13.8399	13.1346	13.258	13.3648	13.7143	13.2894	13.0093	13.3405	13.2238	13.3114	13.3114	13.5302	13.5078	13.5435	13.4073	13.8867	10.7829	11.2985	11.3754	11.1634	10.8463	10.8045	10.9292	11.3177	11.3247	11.3918	10.6954	10.8413	10.9193	11.2563	10.8447	10.5816	10.9027
O89017	O89017	Lgmn	Legumain	sp|O89017|LGMN_MOUSE Legumain OS=Mus musculus OX=10090 GN=Lgmn PE=1 SV=1	49.34	4	10.1	12.556	11.9965	13.2602	13.5529	12.6775	12.8623	13.02	13.261	13.5108	13.1356	11.7541	12.2939	12.7919	13.5307	12.8938	12.3903	12.3891	13.1889	12.9764	12.7999	12.7529	12.6327	13.2996	12.4703	12.866	12.338	11.7844	13.0367	13.3361	12.4562	12.6446	12.8074	13.0513	13.2978	12.9269	11.5543	12.1167	12.586	13.3122	12.6886	12.202	12.1907
Q3U7R1	Q3U7R1	Esyt1	Extended synaptotagmin-1	sp|Q3U7R1|ESYT1_MOUSE Extended synaptotagmin-1 OS=Mus musculus OX=10090 GN=Esyt1 PE=1 SV=2	121.48	14	14.4	15.3676	15.4299	15.8142	15.6969	15.5462	15.3507	15.2369	15.6691	15.8016	15.6817	14.6815	14.6087	15.5184	15.9318	15.7888	15.449	14.8502	15.3556	15.3803	15.2085	15.4811	15.5966	15.4847	15.7279	15.4009	13.7345	13.8028	14.1756	14.065	13.9099	13.7179	13.6094	14.0444	14.1736	14.058	13.0667	13.0164	13.8974	14.2982	14.1686	13.8457	13.2368
Q9JHE3	Q9JHE3	Asah2	Neutral ceramidase	sp|Q9JHE3|ASAH2_MOUSE Neutral ceramidase OS=Mus musculus OX=10090 GN=Asah2 PE=1 SV=1	83.46	2	2.9	12.0769	12.3585	12.2962	12.0831	12.2344	11.8967	11.8546	12.4137	11.9142	12.3047	11.7098	11.8225	11.9473	12.1606	12.0422	12.1071	11.751	11.6547	11.64	11.7765	11.2501	11.1491	11.4217	11.5792	11.5031	11.5694	11.8569	11.7832	11.5768	11.7236	11.3894	11.3526	11.9146	11.4117	11.8066	11.2205	11.3557	11.4518	11.6526	11.5475	11.6293	11.2631
O54774	O54774	Ap3d1	AP-3 complex subunit delta-1	sp|O54774|AP3D1_MOUSE AP-3 complex subunit delta-1 OS=Mus musculus OX=10090 GN=Ap3d1 PE=1 SV=1	135	34	32.2	18.2912	18.6513	18.7942	18.8428	18.7067	18.7462	18.5845	18.691	18.914	18.8407	18.0701	17.6987	18.5956	19.0595	18.8326	18.3201	18.3161	18.4096	18.6815	18.2581	18.9259	18.5322	18.8808	18.8319	18.5725	16.4358	16.8018	16.9333	16.9886	16.848	16.8911	16.7345	16.8439	17.0636	16.9946	16.2329	15.8841	16.7522	17.2036	16.9899	16.4944	16.4803
Q9CQC8	Q9CQC8	Spg21	Maspardin	sp|Q9CQC8|SPG21_MOUSE Maspardin OS=Mus musculus OX=10090 GN=Spg21 PE=1 SV=1	34.93	4	18.2	14.7828	14.7426	14.9885	15.0224	14.6288	15.0493	14.6511	14.7494	15.132	15.2585	14.2092	14.3163	14.6035	14.974	14.8949	14.9287	14.6619	14.9749	13.9144	14.7083	14.7959	14.7675	14.9339	14.9599	14.8473	14.7347	14.7004	14.9349	14.9755	14.5774	15.0016	14.6084	14.7097	15.089	15.2197	14.1793	14.3089	14.5675	14.9254	14.8596	14.9103	14.6334
S4R2P9	S4R2P9	Slc8a3	Sodium/calcium exchanger 3	sp|S4R2P9|NAC3_MOUSE Sodium/calcium exchanger 3 OS=Mus musculus OX=10090 GN=Slc8a3 PE=1 SV=1	102.92	3	3.2	12.8934	12.9288	12.6035	12.8286	12.9107	12.7008	12.7257	13.0265	12.7315	13.2373	12.3099	12.353	12.5793	12.8666	12.6408	13.0067	12.7111	12.964	12.1602	12.1771	12.9298	12.7671	12.4341	12.9369	12.812	11.8009	11.8422	11.5055	11.7373	11.8149	11.6086	11.6387	11.9424	11.644	12.1542	11.2357	11.3013	11.4989	11.7736	11.5611	11.944	11.6383
D3Z4I3	D3Z4I3;Q62176	Rbm24	RNA-binding protein 24	sp|D3Z4I3|RBM24_MOUSE RNA-binding protein 24 OS=Mus musculus OX=10090 GN=Rbm24 PE=1 SV=1	24.81	2	8.9	13.8231	13.725	13.8491	14.0138	13.7412	13.5207	13.6449	14.0532	13.8332	14.1344	13.4181	12.6062	13.61	13.7493	14.0511	13.616	13.8415	13.6414	13.6894	13.3006	13.8079	13.8864	14.01	13.8518	14.2927	15.19	15.0979	15.2106	15.3819	15.1049	14.888	15.0174	15.4285	15.2052	15.5107	14.8033	14.0139	14.989	15.1157	15.4308	15.0127	15.2281
B2RWC4	B2RWC4	Lrrc73	Gm88 protein	tr|B2RWC4|B2RWC4_MOUSE Gm88 protein OS=Mus musculus OX=10090 GN=Lrrc73 PE=1 SV=1	33.43	3	19.3	14.5056	14.3619	14.2054	14.2431		14.3326	14.4965	14.3072	14.6418	14.6588		14.3574	14.5524	13.7147	14.2044	13.8799	14.0185	14.5067	14.457	13.8868	14.3051	14.0451	14.415	13.8298	14.2865	15.6501	15.5123	15.3444	15.3889		15.4774	15.6465	15.4601	15.7914	15.8128		15.5428	15.709	14.8588	15.3617	15.0542	15.1827
Q99ME9	Q99ME9	Gtpbp4	GTP-binding protein 4	sp|Q99ME9|GTPB4_MOUSE GTP-binding protein 4 OS=Mus musculus OX=10090 GN=Gtpbp4 PE=1 SV=3	74.07	6	11	13.3935	13.5157	14.1089	13.9559	13.6434	13.9702	13.4108	14.3017	14.0096	14.1639	12.9714	13.2662	13.6643	13.8991	14.0824	13.9205	13.3944	13.7803	13.4213	13.2593	13.8331	13.9767	13.9405	14.1191	13.739	12.2579	12.3861	12.9678	12.8215	12.5046	12.8349	12.2808	13.1745	12.879	13.0378	11.854	12.1714	12.5407	12.763	12.9597	12.8146	12.2785
Q9D6D0	Q9D6D0	Slc25a27	Mitochondrial uncoupling protein 4	sp|Q9D6D0|UCP4_MOUSE Mitochondrial uncoupling protein 4 OS=Mus musculus OX=10090 GN=Slc25a27 PE=2 SV=1	35.77	5	19.3	14.49	14.7946	14.6334	14.6329	14.561	14.8521	14.6508	15.0324	14.7001	14.9042	14.2455	14.021	14.3763	14.7421	14.7728	14.4778	14.3878	14.75	14.3398	14.3268	14.5841	14.6941	14.6707	14.6054	14.7183	14.194	14.5045	14.3319	14.3381	14.2618	14.5564	14.3603	14.7447	14.4091	14.6176	13.9677	13.7657	14.0923	14.4456	14.4896	14.2115	14.1114
P63137	P63137	Gabrb2	Gamma-aminobutyric acid receptor subunit beta-2	sp|P63137|GBRB2_MOUSE Gamma-aminobutyric acid receptor subunit beta-2 OS=Mus musculus OX=10090 GN=Gabrb2 PE=1 SV=2	59.16	4	9.6	16.6251	16.6022	16.2058	16.363	16.5308	16.4297	16.6218	16.9153	16.4381	16.7029	16.0059	16.3779	16.3964	16.3347	16.3496	16.5672	16.5392	16.7415	15.6835	15.6303	16.42	16.5224	16.4362	16.4756	16.9166	16.2551	16.2381	15.8303	15.9942	16.1575	16.06	16.2572	16.5536	16.0731	16.3422	15.6541	16.0486	16.0384	15.9642	15.9924	16.2269	16.1888
Q8R2U4	Q8R2U4	Ntmt1	N-terminal Xaa-Pro-Lys N-methyltransferase 1	sp|Q8R2U4|NTM1A_MOUSE N-terminal Xaa-Pro-Lys N-methyltransferase 1 OS=Mus musculus OX=10090 GN=Ntmt1 PE=1 SV=3	25.4	2	11.2	16.262	15.9568	16.0883	16.1497	16.0906	15.9203	15.8701	15.9767	16.0809	16.3039	15.6024	15.7194	15.9407	15.8641	16.2954	15.9492	16.1	16.0144	15.3535	15.0548	15.8136	15.762	15.8117	15.8358	15.8866	16.892	16.5927	16.7128	16.7809	16.7173	16.5506	16.5055	16.615	16.7159	16.9433	16.2506	16.3902	16.5827	16.4936	16.9382	16.6089	16.7496
A6H6S0	A6H6S0	Herc3	Hect domain and RLD 3	tr|A6H6S0|A6H6S0_MOUSE Hect domain and RLD 3 OS=Mus musculus OX=10090 GN=Herc3 PE=1 SV=1	117.28	4	4.7	12.5913	12.5722	12.7574	12.6598	12.7848	12.6876	12.5759	12.7062	12.9311	13.08	12.0066	12.5298	12.5622	12.4788	13.0926	12.517	12.5211	12.706	12.2558	11.8717	12.253	12.2532	12.4826	12.3805	12.772	11.0838	11.0706	11.2444	11.1535	11.2741	11.1804	11.0738	11.207	11.4286	11.5818	10.5173	11.0631	11.0667	10.9708	11.5978	11.0391	11.0332
O70585	O70585	Dtnb	Dystrobrevin beta	sp|O70585|DTNB_MOUSE Dystrobrevin beta OS=Mus musculus OX=10090 GN=Dtnb PE=1 SV=3	74.35	4	6.2	12.5834	12.7133	12.7679	12.7032	12.4972	12.7737	12.6359	12.8652	12.774	12.8653	12.519	11.9865	12.4473	12.5852	12.5741	12.568	12.6568	12.5876	12.3109	12.139	12.7447	12.5769	12.746	12.6484	12.9102	11.3259	11.4617	11.5048	11.4469	11.2364	11.5165	11.3838	11.616	11.5215	11.6172	11.2797	10.7698	11.2018	11.3272	11.3293	11.3402	11.419
Q8CBH5	Q8CBH5	Mfsd6	Major facilitator superfamily domain-containing protein 6	sp|Q8CBH5|MFSD6_MOUSE Major facilitator superfamily domain-containing protein 6 OS=Mus musculus OX=10090 GN=Mfsd6 PE=1 SV=1	86.02	4	7.7	15.6615	15.5071	15.3493	15.7958	15.2888	15.0013	15.0491	15.8446	15.5866	16.0661	15.2128	15.1125	15.3387	14.9047	14.8102	15.2906	15.5142	15.5986	15.2155	15.35	15.3885	15.3659	15.3141	15.4588	15.4291	14.8586	14.71	14.5409	14.994	14.4826	14.1987	14.2516	15.0499	14.7886	15.2725	14.428	14.3503	14.5477	14.1012	14.02	14.5173	14.7309
Q80WS3	Q80WS3	Fbll1	rRNA/tRNA 2'-O-methyltransferase fibrillarin-like protein 1	sp|Q80WS3|FBLL1_MOUSE rRNA/tRNA 2'-O-methyltransferase fibrillarin-like protein 1 OS=Mus musculus OX=10090 GN=Fbll1 PE=1 SV=1	33.32	8	40.1	16.9568	16.9483	17.1365	17.3463	17.0895	17.0143	16.8057	17.3205	17.2024	17.5126	16.3257	16.1905	16.9484	17.1193	17.2129	17.0028	16.8308	17.0995	16.9014	16.8992	17.3172	17.3182	17.4763	17.3342	17.4756	16.7388	16.7362	16.913	17.1295	16.8682	16.7966	16.5932	17.1108	16.9894	17.304	16.1259	16.0133	16.7424	16.9007	17.0077	16.8145	16.6324
P24668	P24668	M6pr	Cation-dependent mannose-6-phosphate receptor	sp|P24668|MPRD_MOUSE Cation-dependent mannose-6-phosphate receptor OS=Mus musculus OX=10090 GN=M6pr PE=1 SV=1	31.15	4	23	16.0614	16.2737	16.3993	16.4308	16.2296	16.1099	16.2104	16.7048	16.6247	16.5458	15.6127	15.8155	16.2515	16.2638	16.442	16.1896	15.8172	16.3827	15.9633	16.0539	16.181	16.2325	16.2559	16.4646	16.4419	16.1064	16.3246	16.4388	16.477	16.2713	16.1552	16.2608	16.7582	16.6747	16.6002	15.676	15.9013	16.3086	16.3083	16.4998	16.2643	15.8819
O08585	O08585	Clta	Clathrin light chain A	sp|O08585|CLCA_MOUSE Clathrin light chain A OS=Mus musculus OX=10090 GN=Clta PE=1 SV=2	25.59	5	15.3	18.7914	18.7638	18.9232	19.1699	18.9715	18.4915	18.6432	18.9316	19.3198	19.3943	18.1114	18.1066	18.7846	19.133	19.3168	18.7097	18.1833	19.1391	18.5301	18.5876	18.5033	18.6207	19.0333	19.1386	18.9966	19.936	19.9143	20.0623	20.3157	20.1128	19.6363	19.7932	20.0845	20.4693	20.5483	19.2742	19.292	19.9412	20.2771	20.4742	19.8839	19.3475
A2AJL3	A2AJL3	Fggy	FGGY carbohydrate kinase domain-containing protein	sp|A2AJL3|FGGY_MOUSE FGGY carbohydrate kinase domain-containing protein OS=Mus musculus OX=10090 GN=Fggy PE=1 SV=1	60.3	4	10.7	13.5228	13.6646	13.6697	13.3847	13.2613	14.0325	13.5347	13.4582	13.4953	13.231	13.2399	13.1754	13.3421	13.1661	13.0592	13.3892	13.3221	13.5495	13.1707	13.043	13.1076	13.1277	12.8761	13.1563		12.7198	12.8675	12.8613	12.5829	12.4551	13.2298	12.7372	12.6636	12.6973	12.4374	12.4551	12.4132	12.5511	12.3626	12.269	12.6159	12.5388
Q811G0	Q811G0	Bbs9	Protein PTHB1	sp|Q811G0|PTHB1_MOUSE Protein PTHB1 OS=Mus musculus OX=10090 GN=Bbs9 PE=1 SV=2	98.99	2	2.1	12.9951	13.1783	13.5444	13.3735	13.2277	13.3221	13.0536	13.5248	13.3849	13.5254	12.4012	12.7878	13.2352	13.3292	13.5192	13.1472	12.9383	13.2932	12.8527	12.8306	13.1095	12.9472	13.4318	13.345	13.1164	11.6616	11.8508	12.2054	12.0412	11.891	11.9889	11.7256	12.1996	12.0564	12.2013	11.0859	11.4951	11.9137	11.9952	12.1985	11.8434	11.6245
Q9D9S3	Q9D9S3	Rwdd2a	RWD domain-containing protein 2A	sp|Q9D9S3|RWD2A_MOUSE RWD domain-containing protein 2A OS=Mus musculus OX=10090 GN=Rwdd2a PE=1 SV=1	33.89	4	19.2	14.3835	14.4659	14.0272	14.254	13.9554	14.213	14.015	14.4273	14.3727	14.4635	13.7359	13.607	14.2339	14.4156	14.3639	14.3308	14.103	14.3581	13.3867	13.2476	14.1547	14.327	14.4296	14.4636	14.2962	14.4285	14.5169	14.0667	14.3002	13.9972	14.2583	14.0655	14.4806	14.4227	14.5179	13.7991	13.6928	14.2909	14.4601	14.4217	14.4055	14.1677
Q9JHS9	Q9JHS9	Cwc15	Spliceosome-associated protein CWC15 homolog	sp|Q9JHS9|CWC15_MOUSE Spliceosome-associated protein CWC15 homolog OS=Mus musculus OX=10090 GN=Cwc15 PE=1 SV=1	26.61	2	9.2	14.1623	14.1638	14.4913	14.3555	14.5772	14.0929	13.92	14.3655	14.5184	14.6967	13.555	13.6822	14.2879	14.2766	14.426	14.0394	14.2879	14.2724	13.86	13.865	14.0317	13.9704	14.406	14.244	14.5084	15.1142	15.1216	15.4377	15.3086	15.5259	15.0451	14.8773	15.3257	15.4753	15.658	14.5251	14.6748	15.2518	15.228	15.3907	15.0211	15.2595
Q9CPU2	Q9CPU2	Ndufb2	NADH dehydrogenase [ubiquinone] 1 beta subcomplex subunit 2, mitochondrial	sp|Q9CPU2|NDUB2_MOUSE NADH dehydrogenase [ubiquinone] 1 beta subcomplex subunit 2, mitochondrial OS=Mus musculus OX=10090 GN=Ndufb2 PE=1 SV=1	11.96	2	8.6	17.0841	16.5734	16.9413	17.2976	16.3016	16.2063	16.1405	16.7358	16.9123	17.2768	17.3474	16.2763	16.3683	16.9028	17.249	16.3571	15.9957	16.0501	15.9295	16.2023	15.7938	16.1699	16.045	16.7156	15.9405	19.036	18.5312	18.8877	19.2507	18.2502	18.1585	18.0979	18.6961	18.8692	19.2381	19.3176	18.2689	18.3323	18.8542	19.2137	18.3387	17.9673
Q8C4J7	Q8C4J7	Tbl3	Transducin beta-like protein 3	sp|Q8C4J7|TBL3_MOUSE Transducin beta-like protein 3 OS=Mus musculus OX=10090 GN=Tbl3 PE=2 SV=1	88.21	3	4.6	12.2216	12.43	12.7181	12.6239	12.1582	12.123	12.2851	12.3645	12.5157	12.3586	12.0531	12.0372	12.1171	12.2413	12.2649	11.8761	12.1738	11.8733	12.3234	12.0527	12.1673	12.1775	12.4814	12.6931	12.2263	10.6189	10.8332	11.11	11.0224	10.5523	10.5206	10.6879	10.7701	10.918	10.7653	10.4687	10.4753	10.5264	10.6381	10.675	10.3031	10.5908
Q9D114	Q9D114	Hddc3	Guanosine-3',5'-bis(diphosphate) 3'-pyrophosphohydrolase MESH1	sp|Q9D114|MESH1_MOUSE Guanosine-3',5'-bis(diphosphate) 3'-pyrophosphohydrolase MESH1 OS=Mus musculus OX=10090 GN=Hddc3 PE=1 SV=1	20.25	4	31.8	12.0734	12.4722	12.3686	12.5307	12.8849	11.9658	12.0986	12.3092	12.446	12.8456	11.7263	11.8603	12.17	12.5656	12.7212	11.9577	11.0115	12.3599	12.4965	12.3403	12.1575	12.0339	12.3075	12.5657	12.158	13.2179	13.6226	13.5077	13.6764	14.0262	13.1106	13.2487	13.4621	13.5956	13.9996	12.8891	13.0456	13.3266	13.7097	13.8785	13.132	12.1757
Q3UIU2	Q3UIU2	Ndufb6	NADH dehydrogenase [ubiquinone] 1 beta subcomplex subunit 6	sp|Q3UIU2|NDUB6_MOUSE NADH dehydrogenase [ubiquinone] 1 beta subcomplex subunit 6 OS=Mus musculus OX=10090 GN=Ndufb6 PE=1 SV=3	15.51	4	41.4	16.6594	16.6573	16.9787	16.5882	17.1457	16.449	16.5623	16.8217	16.9697	17.2757	15.7553	15.7988	16.6372	16.7691	17.0496	16.8454	16.5875	17.1928	16.3013	16.3863	16.3144	16.6032	16.8836	16.9921	17.0918	17.6113	17.6151	17.9251	17.5413	18.0944	17.4012	17.5197	17.782	17.9267	18.237	16.7254	16.7915	17.6012	17.7205	18.0143	17.827	17.5591
Q9QZI8	Q9QZI8	Serinc1	Serine incorporator 1	sp|Q9QZI8|SERC1_MOUSE Serine incorporator 1 OS=Mus musculus OX=10090 GN=Serinc1 PE=1 SV=1	50.48	3	7.3	14.6012	14.846	15.1138	15.0915	14.6704	14.8618	14.9806	15.6624	15.4614	15.3891	13.8438	14.3681	14.889	15.3779	15.0648	15.1825	14.6686	15.5921	14.5371	14.3722	15.1078	14.7983	14.9796	15.455	15.7712	14.4656	14.7163	14.9727	14.9571	14.5316	14.7266	14.8505	15.5351	15.3309	15.2629	13.7264	14.2733	14.7655	15.2418	14.9421	15.0766	14.5527
Q61749	Q61749	Eif2b4	Translation initiation factor eIF2B subunit delta	sp|Q61749|EI2BD_MOUSE Translation initiation factor eIF2B subunit delta OS=Mus musculus OX=10090 GN=Eif2b4 PE=1 SV=2	57.59	5	13.5	14.5523	14.6968	14.8033	15.0466	14.9171	15.0872	14.8218	14.925	15.2032	15.1766	14.2771	13.8786	14.8507	15.3181	15.0361	14.2307	14.5642	14.5804	14.9893	14.7242	15.1938	14.7639	15.4016	14.9606	14.577	13.9806	14.1311	14.2262	14.4761	14.3422	14.5158	14.2556	14.3617	14.6366	14.6143	13.7237	13.3477	14.2911	14.7459	14.4773	13.6888	14.0122
P70445	P70445	Eif4ebp2	Eukaryotic translation initiation factor 4E-binding protein 2	sp|P70445|4EBP2_MOUSE Eukaryotic translation initiation factor 4E-binding protein 2 OS=Mus musculus OX=10090 GN=Eif4ebp2 PE=1 SV=1	12.89	3	35	15.0578	15.1017	15.071	15.3748	14.698	14.8828	14.8223	15.3637	15.1419	14.9089	14.715	14.8166	14.3143	14.9391	15.0897	14.9132	14.3497	14.5813	14.8912	15.0399	14.6721	14.9316	15.068	14.6602	15.1022	17.0097	17.0595	17.0174	17.3279	16.6467	16.835	16.7797	17.3239	17.0988	16.8702	16.6851	16.8093	16.2783	16.8905	17.0544	16.8948	16.3213
E9Q394	E9Q394	Akap13	A-kinase anchor protein 13	sp|E9Q394|AKP13_MOUSE A-kinase anchor protein 13 OS=Mus musculus OX=10090 GN=Akap13 PE=1 SV=1	303.79	5	2.4	10.837	11.0452	11.6031	11.1262	11.3421	10.6199	10.886	10.3172	11.4665	11.4558	10.0262		10.8627	10.8561	11.2746	10.8267	10.8844	10.5828	11.2137	11.0458	10.4816	10.7005	10.9843	11.0401	11.0058	7.78893	8.00305	8.54953	8.07928	8.29075	7.57214	7.84334	7.27746	8.42342	8.41705	6.99634		7.8266	7.80745	8.2393	7.80837	7.85602
Q80W04	Q80W04	Tmcc2	Transmembrane and coiled-coil domains protein 2	sp|Q80W04|TMCC2_MOUSE Transmembrane and coiled-coil domains protein 2 OS=Mus musculus OX=10090 GN=Tmcc2 PE=1 SV=1	77.01	11	26.5	15.9394	16.1305	16.1993	16.4242	16.2277	16.0274	15.9969	16.1517	16.2864	16.4637	15.7117	15.4537	16.0176	16.0893	16.4062	15.6377	15.8409	15.9978	15.9314	15.9913	16.1645	15.9882	16.3805	16.1893	16.1686	14.8039	15.0009	15.0582	15.2898	15.0889	14.8921	14.8669	15.0245	15.1558	15.3375	14.5944	14.3589	14.8941	14.9533	15.2835	14.5319	14.725
Q5U4E0	Q5U4E0	Lhfpl4	LHFPL tetraspan subfamily member 4 protein	sp|Q5U4E0|LHPL4_MOUSE LHFPL tetraspan subfamily member 4 protein OS=Mus musculus OX=10090 GN=Lhfpl4 PE=1 SV=1	27.03	2	7.3	14.5481	14.5557	14.5443	14.6246	14.6093	14.6464	14.4469	14.8847	14.8947	15.0316	13.9958	14.4264	14.6545	14.5532	14.6616	14.7592	14.3999	14.776	14.1033	13.6873	14.8064	14.7026	14.9258	14.6482	14.9253	15.1781	15.1916	15.1688	15.2558	15.2361	15.2767	15.0823	15.523	15.5297	15.671	14.644	15.0971	15.2965	15.1827	15.3044	15.4189	15.0496
Q6PAR0	Q6PAR0	Klhdc10	Kelch domain-containing protein 10	sp|Q6PAR0|KLD10_MOUSE Kelch domain-containing protein 10 OS=Mus musculus OX=10090 GN=Klhdc10 PE=1 SV=1	48.98	2	6.8		10.9034	11.3091	10.3406		10.7785	10.6731	11.0488	11.01	11.0908	10.1541		10.1164	10.8545	11.407	10.8692			10.8516	10.1964		10.8629	11.2123	11.042	10.9603		10.5393	10.9336	9.97177		10.4088	10.3086	10.6871	10.645	10.7302	9.80228		9.75844	10.4839	11.0498	10.5289
Q9R0P6	Q9R0P6	Sec11a	Signal peptidase complex catalytic subunit SEC11A	sp|Q9R0P6|SC11A_MOUSE Signal peptidase complex catalytic subunit SEC11A OS=Mus musculus OX=10090 GN=Sec11a PE=1 SV=1	20.61	4	17.9	16.1233	16.3122	16.523	16.297	16.1649	16.2331	16.172	16.3642	16.3491	16.4649	15.5514	15.599	16.205	16.3558	16.4246	16.2309	16.1449	16.3215	15.7332	15.6728	16.2572	16.2654	16.3091	16.2544	16.4262	16.7532	16.9481	17.1475	16.9282	16.7916	16.8634	16.8075	17.0025	16.9841	17.1043	16.1996	16.2697	16.8471	16.9852	17.0674	16.8906	16.7946
Q3UHD9	Q3UHD9	Agap2	Arf-GAP with GTPase, ANK repeat and PH domain-containing protein 2	sp|Q3UHD9|AGAP2_MOUSE Arf-GAP with GTPase, ANK repeat and PH domain-containing protein 2 OS=Mus musculus OX=10090 GN=Agap2 PE=1 SV=1	124.43	19	20.5	18.9389	19.2114	19.18	19.2424	19.2008	19.1178	19.0938	19.2655	19.3949	19.4249	18.7583	18.4301	19.1644	19.1496	19.2617	18.9607	18.9178	18.983	18.9668	18.7146	19.249	19.0495	19.415	19.3092	19.2695	17.1629	17.4413	17.3985	17.4676	17.4215	17.3421	17.3232	17.4978	17.6239	17.6583	17.0005	16.6949	17.4004	17.3731	17.4985	17.2144	17.1615
P35550	P35550	Fbl	rRNA 2'-O-methyltransferase fibrillarin	sp|P35550|FBRL_MOUSE rRNA 2'-O-methyltransferase fibrillarin OS=Mus musculus OX=10090 GN=Fbl PE=1 SV=2	34.29	5	26	16.8333	17.0053	17.1768	17.1699	16.9676	16.8891	16.7846	17.0882	17.3358	17.2411	16.1946	16.2176	16.9417	17.2351	17.1964	16.86	16.7953	16.9433	16.7117	16.6356	17.1545	17.0846	17.3211	17.2584	17.1385	16.4633	16.6412	16.8013	16.8011	16.5944	16.5194	16.4201	16.7265	16.9708	16.8804	15.8428	15.8883	16.5837	16.8645	16.8392	16.5197	16.4449
Q9CZN4	Q9CZN4	Shisa9	Protein shisa-9	sp|Q9CZN4|SHSA9_MOUSE Protein shisa-9 OS=Mus musculus OX=10090 GN=Shisa9 PE=1 SV=2	46.81	6	16.5	14.2191	14.1863	14.2128	14.3565	14.0699	14.2714	14.1569	14.8178	14.3638	14.77	14.2307	13.8062	14.186	14.5825	14.4274	13.72	13.3022	14.1962	14.0886	14.134	14.4659	14.469	14.1418	14.2235	14.4116	13.8491	13.8222	13.8373	13.9877	13.6966	13.9017	13.7923	14.4561	13.9988	14.4094	13.8789	13.4769	13.8281	14.2119	14.0702	13.3797	12.9519
Q9DBX6	Q9DBX6	Cyp2s1	Cytochrome P450 2S1	sp|Q9DBX6|CP2S1_MOUSE Cytochrome P450 2S1 OS=Mus musculus OX=10090 GN=Cyp2s1 PE=1 SV=1	55.6	2	4.8	12.155	11.6323	12.3622	12.3354	12.3884	12.1304	11.9806	12.4696	12.8227	12.6239	11.3705	12.2013	12.0621	12.0585	12.1545	12.6369	12.1395	12.4509	11.8944	11.1831	11.8171	11.6944	12.0853	12.1694	11.7787	11.2995	10.7828	11.5013	11.4812	11.5297	11.2753	11.1306	11.6225	11.9723	11.7779	10.5333	11.3867	11.2187	11.2025	11.3119	11.8112	11.3037
Q9D0K0	Q9D0K0	Tbc1d7	TBC1 domain family member 7	sp|Q9D0K0|TBCD7_MOUSE TBC1 domain family member 7 OS=Mus musculus OX=10090 GN=Tbc1d7 PE=1 SV=1	33.8	4	14	14.6303	14.9064	15.1429	15.0415	14.9905	14.7732	14.6689	15.4295	15.0963	15.3787	14.5609	14.0329	14.936	14.846	15.1349	14.7856	14.5589	15.1298	14.6636	14.6653	14.9312	15.0554	15.064	14.9604	15.0415	14.1899	14.4719	14.697	14.6022	14.5468	14.3331	14.234	14.9974	14.6609	14.9476	14.1387	13.6333	14.5076	14.4051	14.7073	14.3749	14.1382
P70181	P70181	Pip5k1b	Phosphatidylinositol 4-phosphate 5-kinase type-1 beta	sp|P70181|PI51B_MOUSE Phosphatidylinositol 4-phosphate 5-kinase type-1 beta OS=Mus musculus OX=10090 GN=Pip5k1b PE=1 SV=1	60.76	2	5.6	12.5986	13.4666	12.3588	12.6898	12.793	12.2359	12.724	12.9614	12.7873	12.7837	12.6471	13.1614	12.8938	12.2694	12.6888	12.4684	12.7477	12.1578	11.6228	11.9986	12.0763	12.7235	11.6989	12.0064	12.8209	12.1581	13.0321	11.9129	12.2505	12.3493	11.7958	12.289	12.5294	12.3519	12.3527	12.2249	12.7618	12.4654	11.8285	12.2612	12.0577	12.327
Q99NF3	Q99NF3	Cep41	Centrosomal protein of 41 kDa	sp|Q99NF3|CEP41_MOUSE Centrosomal protein of 41 kDa OS=Mus musculus OX=10090 GN=Cep41 PE=1 SV=1	41.42	3	8.8	13.6011	13.8202	13.6753	13.645	13.3605	13.7749	13.6733	13.8206	13.7792	13.7574	13.0481	12.8917	13.4654	13.5568	13.7009	13.7585	13.7506	13.6992	12.854	13.4403	13.7057	13.9391	13.8443	13.7259	13.6032	13.3051	13.5301	13.3738	13.3502	13.0613	13.4792	13.3828	13.5329	13.4882	13.4708	12.7703	12.6365	13.1814	13.2603	13.4177	13.4922	13.4742
P52189	P52189	Kcnj4	Inward rectifier potassium channel 4	sp|P52189|KCNJ4_MOUSE Inward rectifier potassium channel 4 OS=Mus musculus OX=10090 GN=Kcnj4 PE=1 SV=1	49.87	5	14.8	17.2774	17.1605	17.2542	17.4052	17.3276	17.129	17.0673	17.4602	17.4566	17.6153	16.5678	16.9477	17.3492	17.2364	17.193	17.2961	17.1069	17.2371	16.6847	16.7935	17.3513	17.1277	17.2662	17.2225	17.2536	17.2293	17.1183	17.2006	17.3583	17.2763	17.0812	17.0246	17.4205	17.4135	17.5766	16.5379	16.9404	17.3132	17.1878	17.1577	17.2778	17.0784
Q80TN7	Q80TN7	Nav3	Neuron navigator 3	sp|Q80TN7|NAV3_MOUSE Neuron navigator 3 OS=Mus musculus OX=10090 GN=Nav3 PE=1 SV=2	252.15	11	5.8	12.0595	12.0705	12.1595	12.2035	12.2695	12.1603	11.9304	12.4603	12.3689	12.6769	12.0227	11.6504	12.1253	12.0509	12.195	12.0741	11.9891	12.0647	11.8375	11.6096	12.7813	12.5598	12.6298	12.6959	12.6096	9.12872	9.1457	9.22328	9.27396	9.33546	9.22983	9.00516	9.53792	9.44318	9.75554	9.11023	8.76045	9.20657	9.11967	9.27709	9.17309	9.07806
Q8BVP5	Q8BVP5	Csnk1g2	Casein kinase I isoform gamma-2	sp|Q8BVP5|KC1G2_MOUSE Casein kinase I isoform gamma-2 OS=Mus musculus OX=10090 GN=Csnk1g2 PE=1 SV=1	47.55	5	17.1	14.0531	14.1916	14.0044	14.1452	13.8602	14.008	13.8767	14.1205	14.1149	14.3124	13.2454	13.5057	13.8127	13.9212	14.1814	14.157	13.782	14.2084	13.6325	13.5046	14.0427	14.1121	14.1337	14.1321	14.0904	13.6127	13.7571	13.5585	13.706	13.4165	13.5679	13.4418	13.6884	13.6795	13.8814	12.8232	13.1061	13.3843	13.4803	13.7537	13.7463	13.3613
Q9JMG7	Q9JMG7	Hdgfl3	Hepatoma-derived growth factor-related protein 3	sp|Q9JMG7|HDGR3_MOUSE Hepatoma-derived growth factor-related protein 3 OS=Mus musculus OX=10090 GN=Hdgfl3 PE=1 SV=2	22.42	2	15.3	17.7782	18.0791	18.0129	18.112	17.7348	17.9684	17.6724	18.2979	18.4445	18.4226	17.4966	17.5	17.811	18.1789	18.1877	17.5685	17.7728	17.7449	17.5122	18.0165	18.0308	17.7863	17.6852	18.1756	17.8734	18.7301	19.0369	18.9593	19.0651	18.6835	18.9206	18.6297	19.2582	19.4015	19.3839	18.4667	18.4927	18.7749	19.1303	19.1524	18.5501	18.7443
Q9D4J1	Q9D4J1	Efhd1	EF-hand domain-containing protein D1	sp|Q9D4J1|EFHD1_MOUSE EF-hand domain-containing protein D1 OS=Mus musculus OX=10090 GN=Efhd1 PE=1 SV=1	26.98	5	26.2	19.8732	20.0604	20.1873	20.1656	20.0184	19.9451	19.6231	20.2928	20.2762	20.1437	19.2937	19.4619	19.8628	19.9385	19.9722	19.9396	19.9488	20.0089	19.6913	19.7345	19.6544	20.0035	19.8293	19.9969	19.7903	20.2401	20.4332	20.5488	20.5337	20.3821	20.3123	19.9955	20.6681	20.6482	20.52	19.6789	19.8697	20.2418	20.3049	20.3519	20.3363	20.3354
P70379	P70379	Fgf14	Fibroblast growth factor 14	sp|P70379|FGF14_MOUSE Fibroblast growth factor 14 OS=Mus musculus OX=10090 GN=Fgf14 PE=2 SV=1	27.75	2	6.5	17.2719	17.1724	17.8189	17.4661	17.646	17.2046	17.2032	17.489	17.3374	17.5305	16.9499	16.855	17.3115	17.1888	17.4194	17.2716	16.9566	17.3019	17.1491	17.0094	17.2469	17.0779	17.3392	17.2017	17.5253	17.5233	17.4298	18.0649	17.7187	17.8942	17.4563	17.4601	17.7488	17.5939	17.7914	17.2196	17.1473	17.575	17.4397	17.6836	17.5527	17.2277
Q91Y63	Q91Y63	Slc13a3	Na(+)/dicarboxylate cotransporter 3	sp|Q91Y63|S13A3_MOUSE Na(+)/dicarboxylate cotransporter 3 OS=Mus musculus OX=10090 GN=Slc13a3 PE=1 SV=1	66.1	3	10.8	13.9032	13.6485	14.249	13.4879	13.3359	13.2362	13.4738	13.9184	13.9451	13.6605	12.7747	12.6755	13.4161	13.7139	13.2926	13.7508	13.4289	13.7541	13.6882	13.6375	14.2237	14.1643	13.5442	14.2568	14.0558	14.5332	14.2844	14.8734	14.1191	13.9626	13.8665	14.1093	14.5567	14.5801	14.2999	13.4229	13.3462	14.0581	14.3434	13.9354	14.4105	14.0785
Q9Z277	Q9Z277	Baz1b	Tyrosine-protein kinase BAZ1B	sp|Q9Z277|BAZ1B_MOUSE Tyrosine-protein kinase BAZ1B OS=Mus musculus OX=10090 GN=Baz1b PE=1 SV=2	170.54	8	5.5	14.368	14.6575	14.8321	14.9251	14.867	14.7453	14.4973	14.7969	14.9833	14.9373	14.2026	13.7762	14.6871	14.9479	15.1364	14.2731	14.2852	14.3155	14.7026	14.5572	14.9483	14.6691	15.0283	15.0182	14.6114	12.0345	12.3299	12.4931	12.5928	12.5303	12.4121	12.1693	12.4718	12.6548	12.6132	11.8874	11.4835	12.3657	12.6139	12.8157	11.9693	11.9714
Q8R4E6	Q8R4E6	Purg	Purine-rich element-binding protein gamma	sp|Q8R4E6|PURG_MOUSE Purine-rich element-binding protein gamma OS=Mus musculus OX=10090 GN=Purg PE=1 SV=1	39.91	4	12	16.8145	16.9729	17.0568	17.0151	16.8384	16.7371	16.837	17.2805	17.0521	17.3229	16.8824	16.2401	16.799	16.9522	16.9472	16.7265	16.4003	16.9277	16.8439	16.4833	17.0451	16.8572	17.2356	17.199	17.3841	16.959	17.1233	17.1959	17.1609	16.9797	16.882	16.987	17.4334	17.2017	17.4769	17.0451	16.4254	16.9556	17.0962	17.1045	16.9008	16.5646
O70405	O70405	Ulk1	Serine/threonine-protein kinase ULK1	sp|O70405|ULK1_MOUSE Serine/threonine-protein kinase ULK1 OS=Mus musculus OX=10090 GN=Ulk1 PE=1 SV=1	112.39	5	5.9	12.945	13.0097	13.549	13.5243	13.3175	13.1796	13.282	13.5294	13.6533	13.7622	12.7297	12.8514	13.611	13.2852	13.437	13.1177	13.0827	13.1254	13.2748	12.5142	13.2251	13.3152	13.66	13.2906	13.2853	11.169	11.2396	11.7675	11.7495	11.5382	11.4039	11.5115	11.7617	11.8823	11.9956	10.9719	11.1162	11.847	11.5087	11.6738	11.3714	11.3263
Q5FWI3	Q5FWI3	Cemip2	Cell surface hyaluronidase	sp|Q5FWI3|CEIP2_MOUSE Cell surface hyaluronidase OS=Mus musculus OX=10090 GN=Cemip2 PE=1 SV=1	153.7	5	2.9	12.3202	12.3259	12.516	12.4198	12.3322	12.2638	12.0262	12.5152		12.6739	12.0091	11.9828		12.3049	12.5634	12.5125	12.3859	12.3478	12.3525	12.3003	12.4205	12.4243	12.5002	12.5553	12.5711	9.89704	9.90871	10.0874	9.99784	9.90579	9.84097	9.60853	10.1004		10.2602	9.60419	9.60044		9.88122	10.153	10.1191	9.9824
Q8K201	Q8K201	Kct2	Keratinocyte-associated transmembrane protein 2	sp|Q8K201|KCT2_MOUSE Keratinocyte-associated transmembrane protein 2 OS=Mus musculus OX=10090 GN=Kct2 PE=1 SV=2	28.03	2	8.9	12.4621	12.7176	12.8704	12.7388	12.6003	12.5106	12.4806	12.8349	12.693	12.9999	12.0467	12.2325	12.6266	12.6752	12.717	12.2559	12.6345	12.6178	12.2538	12.1281	12.6844	12.627	12.8428	12.7766	12.8955	12.9546	13.216	13.3574	13.2324	13.0895	13.0034	12.9786	13.3358	13.1905	13.5018	12.5574	12.7657	13.1311	13.1671	13.2222	12.7781	13.1467
Q62036	Q62036	Cep131	Centrosomal protein of 131 kDa	sp|Q62036|CP131_MOUSE Centrosomal protein of 131 kDa OS=Mus musculus OX=10090 GN=Cep131 PE=1 SV=2	120.24	6	6.8	12.7211	12.8411	13.2941	13.3069	12.5678	12.8858	12.7754	13.158	13.128	13.3355	12.5478	12.2411	12.8737	12.9242	13.286	12.5843	12.8299	12.8007	12.6875	12.5198	13.0472	13.0156	13.321	13.1699	13.0011	10.7661	10.892	11.3336	11.3531	10.6096	10.9311	10.8259	11.2114	11.178	11.3899	10.6111	10.3269	10.9308	10.9687	11.3438	10.6591	10.8945
B2RY04	B2RY04	Dock5	Dedicator of cytokinesis protein 5	sp|B2RY04|DOCK5_MOUSE Dedicator of cytokinesis protein 5 OS=Mus musculus OX=10090 GN=Dock5 PE=1 SV=2	214.29	12	7.1	13.715	14.1861	14.385	14.2317	14.1336	14.0898	14.014	13.7918	14.4931	14.0857	13.7643	12.6608	13.9491	14.2375	14.3131	13.9782	13.8679	13.7583	13.9593	13.9188	13.415	13.3969	13.6707	13.8832	13.053	11.067	11.544	11.7315	11.5849	11.4823	11.4421	11.3714	11.1521	11.8501	11.4471	11.1345	10.0536	11.3132	11.589	11.6779	11.3599	11.2396
Q8BQU6	Q8BQU6	Gjc2	Gap junction gamma-2 protein	sp|Q8BQU6|CXG2_MOUSE Gap junction gamma-2 protein OS=Mus musculus OX=10090 GN=Gjc2 PE=1 SV=2	46.98	2	10.5	12.7836	13.0511	12.7183	12.9338	12.805	12.7674	12.6711	12.8232	13.2935	12.9688	12.3415	12.3197	12.3631	12.7173	12.6757	13.0646	12.6855	12.784	12.4391	12.7094	11.9365	12.1642	12.1935	12.337	12.1142	12.4875	12.761	12.4168	12.639	12.5057	12.4717	12.3805	12.5355	13.0025	12.6822	12.0637	12.0644	12.0791	12.4207	12.3925	12.7983	12.4092
Q3UXZ6	Q3UXZ6	Fam81a	Protein FAM81A	sp|Q3UXZ6|FA81A_MOUSE Protein FAM81A OS=Mus musculus OX=10090 GN=Fam81a PE=1 SV=2	41.68	12	36	16.2225	16.257	16.1831	16.432	16.4138	16.4648	16.2338	16.9576	16.5345	17.0134	15.9492	16.0258	16.1723	16.8827	16.6155	16.0232	16.0302	16.2568	16.0062	16.0382	16.8755	16.5007	16.4617	16.5	16.4021	15.7821	15.8225	15.7372	15.9928	15.9701	16.0247	15.7989	16.5255	16.0991	16.5824	15.527	15.6262	15.744	16.4418	16.1879	15.6125	15.6095
Q9D0J8	Q9D0J8	Ptms	Parathymosin	sp|Q9D0J8|PTMS_MOUSE Parathymosin OS=Mus musculus OX=10090 GN=Ptms PE=1 SV=3	11.42	5	23.8	19.6538	19.6529	19.6633	19.8118	19.5712	19.5928	19.647	19.9135	20.0254	20.0274	18.952	19.0338	19.6895	19.7432	19.9198	19.7666	19.5443	19.8838	19.2319	19.1015	19.8567	19.9583	20.0891	20.043	20.0286	22.0207	22.0258	22.0247	22.18	21.9349	21.96	22.0195	22.2887	22.3974	22.4038	21.3372	21.4415	22.0685	22.1096	22.2996	22.1633	21.9309
Q8VI59	Q8VI59	Pcnx3	Pecanex-like protein 3	sp|Q8VI59|PCX3_MOUSE Pecanex-like protein 3 OS=Mus musculus OX=10090 GN=Pcnx3 PE=1 SV=2	221.43	6	3.9	12.1602	12.1629	12.3198	12.2139	12.2061	12.2456	12.082	12.4091	12.3091	12.5903	11.4063	11.6106	12.2864	12.4414	12.3791	12.1707	12.1164	12.3732	11.5865	11.6358	12.1723	12.0644	11.9497	12.0975	12.4027	9.65266	9.66128	9.80681	9.70761	9.69529	9.73836	9.57996	9.90989	9.80663	10.0921	8.91702	9.14391	9.79089	9.9334	9.88439	9.69289	9.62855
Q8CIP4	Q8CIP4	Mark4	MAP/microtubule affinity-regulating kinase 4	sp|Q8CIP4|MARK4_MOUSE MAP/microtubule affinity-regulating kinase 4 OS=Mus musculus OX=10090 GN=Mark4 PE=1 SV=1	82.59	7	13.3	14.7341	15.0429	15.0063	15.0911	15.1057	14.9363	15.0156	15.2042	15.1761	15.3615	14.6112	14.4812	14.887	14.9547	15.0887	14.7669	14.7935	14.9446	14.8095	14.6467	15.0264	15.0168	15.239	15.166	15.1066	13.2937	13.6084	13.5604	13.6519	13.6621	13.4962	13.5806	13.7722	13.7407	13.9305	13.189	13.0815	13.4586	13.5138	13.661	13.3562	13.3727
Q99JF8	Q99JF8	Psip1	PC4 and SFRS1-interacting protein	sp|Q99JF8|PSIP1_MOUSE PC4 and SFRS1-interacting protein OS=Mus musculus OX=10090 GN=Psip1 PE=1 SV=1	59.66	11	25	17.6968	17.8023	17.8499	17.9423	17.738	17.7741	17.69	17.8207	17.9445	18.0952	17.2719	16.9157	17.5744	17.8099	17.948	17.6351	17.839	17.3555	17.6626	17.6533	17.9268	17.8655	17.9719	17.9756	17.7189	16.8939	17.0053	17.0414	17.1405	16.9318	16.9714	16.8925	17.0261	17.1465	17.3016	16.4871	16.1535	16.7835	17.0064	17.1579	16.8618	17.0557
P63058	P63058	Thra	Thyroid hormone receptor alpha	sp|P63058|THA_MOUSE Thyroid hormone receptor alpha OS=Mus musculus OX=10090 GN=Thra PE=1 SV=2	54.99	6	17.7	14.5371	14.6121	14.6533	14.6563	14.525	14.4851	14.3851	14.7552	14.7601	14.9846	14.0493	14.2956	14.5938	14.4831	14.5498	14.4544	14.284	14.506	14.246	14.2057	14.4884	14.6192	14.7836	14.6261	14.7834	13.5821	13.663	13.6928	13.7025	13.5668	13.5305	13.4356	13.8085	13.8101	14.039	13.1125	13.3814	13.6509	13.5276	13.6076	13.5291	13.3487
P27661	P27661	H2ax	Histone H2AX	sp|P27661|H2AX_MOUSE Histone H2AX OS=Mus musculus OX=10090 GN=H2ax PE=1 SV=2	15.13	5	58.7	18.4801	18.5952	18.6385	19.1024	19.2253	18.7102	18.493	18.4753	19.0673	18.883	18.0459	18.001	18.4918	19.1094	19.3185	17.9423	17.9558	18.1282	19.0804	18.9118	18.6048	18.3347	18.871	18.6196	18.428	19.6247	19.7457	19.7775	20.2482	20.3666	19.855	19.643	19.6282	20.2169	20.037	19.2086	19.1863	19.6484	20.2534	20.4759	19.1165	19.12
Q08024	Q08024	Cbfb	Core-binding factor subunit beta	sp|Q08024|PEBB_MOUSE Core-binding factor subunit beta OS=Mus musculus OX=10090 GN=Cbfb PE=1 SV=1	22.02	2	8	12.6008	13.0237	12.1159	13.1622	13.2174	12.8187		12.7013	13.3557	13.2632			13.0417	12.524	12.761	11.9371	12.3156	12.7758	12.3007	11.9953		12.3741	12.4523	12.6765	13.3142	13.5527	13.9815	13.0623	14.1153	14.1661	13.7709		13.6615	14.3126	14.2245			14.0057	13.4754	13.7257	12.9187	13.2872
Q9CY66	Q9CY66	Gar1	H/ACA ribonucleoprotein complex subunit 1	sp|Q9CY66|GAR1_MOUSE H/ACA ribonucleoprotein complex subunit 1 OS=Mus musculus OX=10090 GN=Gar1 PE=1 SV=1	23.46	4	15.6	15.6299	15.8809	16.168	16.2487	16.0833	15.9407	15.8207	16.1979	16.285	16.4219	15.237	14.9451	15.9626	16.2118	16.2304	16	15.8448	15.9451	15.8194	15.7983	16.1249	16.1236	16.2979	16.2642	16.2551	15.8814	16.1382	16.414	16.5014	16.3316	16.1925	16.0776	16.4577	16.5415	16.6828	15.5067	15.2373	16.2261	16.4628	16.4946	16.2812	16.1159
Q99LJ1	Q99LJ1	Fuca1	Tissue alpha-L-fucosidase	sp|Q99LJ1|FUCO_MOUSE Tissue alpha-L-fucosidase OS=Mus musculus OX=10090 GN=Fuca1 PE=1 SV=1	52.25	2	4.9	15.2328	15.3611	15.8331	15.4109	15.3591	15.2542	15.1362	15.3042	15.431	15.4456	14.9484	14.7327	15.2156	15.5082	15.3392	14.9937	15.2099	15.243	15.1348	14.7612	15.0876	15.1563	15.4013	15.0124	15.1035	14.7923	14.9266	15.3871	14.9717	14.9154	14.8141	14.7013	14.8721	14.9957	15.0146	14.5262	14.3331	14.7873	15.0673	14.9116	14.583	14.7892
Q8BL80	Q8BL80	Arhgap22	Rho GTPase-activating protein 22	sp|Q8BL80|RHG22_MOUSE Rho GTPase-activating protein 22 OS=Mus musculus OX=10090 GN=Arhgap22 PE=1 SV=2	77.74	3	4.7	12.9897	12.5259	13.3735	12.9176	12.6203	12.8	12.6179	12.9912	12.4766	13.0584	12.645	12.3951	12.9096	12.5431	12.4057	12.1002	12.7176	12.9052	12.5254	12.5515	12.5527	12.2566	12.4054	12.7128		11.8123	11.3544	12.1906	11.7414	11.4397	11.6229	11.446	11.8222	11.3043	11.8904	11.4859	11.2585	11.7442	11.3652	11.2412	10.9525	11.5599
Q9DB90	Q9DB90	Smg9	Nonsense-mediated mRNA decay factor SMG9	sp|Q9DB90|SMG9_MOUSE Nonsense-mediated mRNA decay factor SMG9 OS=Mus musculus OX=10090 GN=Smg9 PE=1 SV=1	57.58	4	12.3	13.0507	13.3928	13.3201	12.8688	13.1274	13.1915	12.9861	13.3106	13.2985	13.3541	12.7191	12.9161	13.0317	13.0237	13.0163	12.9672	13.392	12.8341	12.9914	12.3391	12.9465	12.9939	13.083	12.668	13.0529	12.6103	12.9583	12.8742	12.4296	12.6838	12.7514	12.5512	12.8785	12.8631	12.9231	12.2969	12.5164	12.6033	12.5828	12.5887	12.5565	12.9713
O35239	O35239	Ptpn9	Tyrosine-protein phosphatase non-receptor type 9	sp|O35239|PTN9_MOUSE Tyrosine-protein phosphatase non-receptor type 9 OS=Mus musculus OX=10090 GN=Ptpn9 PE=1 SV=2	67.93	15	27.8	16.8204	17.0572	16.9621	16.9648	16.9599	16.8204	16.9569	17.2654	17.1855	17.2068	16.2245	16.4426	16.8333	16.8282	17.0247	17.1033	16.9241	17.1934	16.601	16.3566	16.8794	16.8945	17.0174	17.0247	17.2385	15.7279	15.9707	15.8642	15.8735	15.8641	15.7282	15.8699	16.1813	16.0981	16.1237	15.1502	15.3909	15.7528	15.7352	15.945	16.0405	15.8513
Q80YR6	Q80YR6	Rbbp8	DNA endonuclease RBBP8	sp|Q80YR6|CTIP_MOUSE DNA endonuclease RBBP8 OS=Mus musculus OX=10090 GN=Rbbp8 PE=1 SV=1	100.77	2	1.7	16.1677	16.2663	16.2541	16.3527	16.2893	16.3053	15.9688	16.4775	16.1439	16.5024	15.9818	16.2433	15.8999	16.0065	15.8651	16.0833	16.304	16.0991	15.9653	15.613	15.7029	15.9567	15.8892	15.7051	16.0417	14.5049	14.6094	14.5858	14.6911	14.6232	14.6428	14.3114	14.8231	14.4861	14.8489	14.3372	14.6213	14.2491	14.3432	14.2151	14.4502	14.6609
Q5SQ27	Q5SQ27	Sec14l3	SEC14-like 3 (S. cerevisiae)	tr|Q5SQ27|Q5SQ27_MOUSE SEC14-like 3 (S. cerevisiae) OS=Mus musculus OX=10090 GN=Sec14l3 PE=1 SV=1	46.05	3	7.7	13.0762	12.9425	12.8107	13.2124	13.0517	12.792	12.0179	14.2397	12.8197	13.9226	12.744	12.5472	12.4396	13.5758	12.9378	12.4505	12.5117	13.2285	12.6559	13.128	12.5732	12.3311	12.3566	12.0902	12.237	12.5045	12.3767	12.2335	12.6419	12.4768	12.2207	11.4517	13.6764	12.253	13.3603	12.1905	12.0163	11.88	13.0036	12.379	11.9086	11.9597
Q3UIA2	Q3UIA2	Arhgap17	Rho GTPase-activating protein 17	sp|Q3UIA2|RHG17_MOUSE Rho GTPase-activating protein 17 OS=Mus musculus OX=10090 GN=Arhgap17 PE=1 SV=1	92.14	5	7.7	14.0066	14.7435	15.0875	14.8076	14.5828	14.8383	14.3313	14.639	15.0951	14.7346	14.0322	13.8073	14.7066	14.7164	14.9457	14.2981	14.352	14.5103	14.4962	14.3366	14.4653	14.1285	14.6768	14.6245	13.9933	12.7886	13.5314	13.864	13.5907	13.3615	13.6206	13.1188	13.4294	13.8821	13.526	12.8324	12.6301	13.5006	13.4978	13.7405	13.1097	13.1537
P52623	P52623	Uck1	Uridine-cytidine kinase 1	sp|P52623|UCK1_MOUSE Uridine-cytidine kinase 1 OS=Mus musculus OX=10090 GN=Uck1 PE=1 SV=2	31.05	6	25.3	16.1977	16.3328	16.3868	16.2849	16.2336	16.1011	16.1216	16.3858	16.3589	16.4199	15.6399	15.6626	16.3115	16.3163	16.4088	16.1965	16.1606	16.1134	15.7124	15.6369	16.204	16.1221	16.2597	16.323	16.5305	16.2427	16.3837	16.4263	16.3311	16.2754	16.1465	16.1721	16.4392	16.4089	16.4743	15.7032	15.7484	16.3686	16.3608	16.4667	16.2712	16.2252
P82343	P82343	Renbp	N-acylglucosamine 2-epimerase	sp|P82343|RENBP_MOUSE N-acylglucosamine 2-epimerase OS=Mus musculus OX=10090 GN=Renbp PE=1 SV=4	48.48	3	9.1	14.1374	14.2731	14.0112	13.9979	13.6064	14.2301	14.0477	13.6682	13.9152	13.6455	13.7276	13.8135	13.8618	13.7329	13.6598	13.7826	13.8573	13.2946	13.5963	13.5464	13.3797	13.7422	13.2135	13.0032	12.6129	13.697	13.8386	13.5653	13.5587	13.1627	13.79	13.6128	13.2361	13.4798	13.2145	13.3054	13.4139	13.4335	13.2919	13.2322	13.3719	13.4366
P63054	P63054	Pcp4	Calmodulin regulator protein PCP4	sp|P63054|PCP4_MOUSE Calmodulin regulator protein PCP4 OS=Mus musculus OX=10090 GN=Pcp4 PE=3 SV=2	6.8	2	17.7	22.5668	22.66	22.6791	22.7995	22.8136	22.6212	22.6984	23.059	22.9428	23.158	22.0093	22.2183	22.6585	22.8042	22.901	22.4883	22.8456	22.72	22.3006	22.3955	23.0203	22.9215	23.0314	23.1446	23.321	24.5187	24.6178	24.6255	24.7526	24.7623	24.5734	24.6557	25.0193	24.8997	25.1193	23.9794	24.211	24.6225	24.7556	24.8657	24.47	24.8172
Q9EQG7	Q9EQG7	Enpp5	Ectonucleotide pyrophosphatase/phosphodiesterase family member 5	sp|Q9EQG7|ENPP5_MOUSE Ectonucleotide pyrophosphatase/phosphodiesterase family member 5 OS=Mus musculus OX=10090 GN=Enpp5 PE=1 SV=3	54.35	4	15.1	16.686	16.4656	16.7172	16.4774	16.6044	16.2934	16.4615	16.8338	16.7933	16.7955	16.0194	16.3132	16.468	16.3936	16.6336	16.467	16.2418	16.4712	16.1479	16.3177	16.4592	16.3207	16.5125	16.539	16.469	16.5505	16.3359	16.5762	16.343	16.4656	16.1582	16.3314	16.7066	16.6628	16.6693	15.902	16.2185	16.3445	16.2576	16.5108	16.3611	16.1259
Q8CHR6	Q8CHR6	Dpyd	Dihydropyrimidine dehydrogenase [NADP(+)]	sp|Q8CHR6|DPYD_MOUSE Dihydropyrimidine dehydrogenase [NADP(+)] OS=Mus musculus OX=10090 GN=Dpyd PE=1 SV=1	111.18	2	2.2	11.7378	11.7143	11.9508	11.5132		11.5433	11.4647	11.696	11.8778			10.8579	11.9842		12.2866	11.4035	11.4481	11.5713	11.6508	11.515	11.2325	10.9088	11.6076	11.1353	11.5987	10.075	10.0574	10.2825	9.85156		9.88077	9.80741	10.0415	10.22			9.23592	10.3335		10.6366	9.77038	9.80495
O35972	O35972	Mrpl23	Large ribosomal subunit protein uL23m	sp|O35972|RM23_MOUSE Large ribosomal subunit protein uL23m OS=Mus musculus OX=10090 GN=Mrpl23 PE=1 SV=1	17.11	3	36.3	14.739	15.1944	14.9182	15.1236	14.8479	14.446	14.6155	14.892	15.0675	14.8647	14.472	14.3453	14.7921	14.5401	14.9616	14.7945	14.8412	14.3795	14.6242	14.3069	14.9335	14.9243	13.8006	13.8396	13.9436	15.521	15.9823	15.6947	15.9068	15.6266	15.2283	15.4029	15.6824	15.8545	15.6561	15.2722	15.168	15.5861	15.3216	15.7564	15.6062	15.6428
Q8VHV1	Q8VHV1	Baalc	Brain and acute leukemia cytoplasmic protein	sp|Q8VHV1|BAALC_MOUSE Brain and acute leukemia cytoplasmic protein OS=Mus musculus OX=10090 GN=Baalc PE=1 SV=3	15.51	2	14.5	15.5783	15.4624	15.7113	15.8651	15.5109	15.1821	15.3922	15.9731	15.8147	16.0393	14.8463	15.2022	15.7601	15.5937	15.3544	15.3745	15.2681	15.3291	15.3761	15.7801	15.2257	15.5687	15.7823	15.764	15.5462	16.7229	16.6129	16.8504	17.0108	16.6522	16.327	16.5423	17.126	16.9643	17.1933	16.0091	16.3875	16.9167	16.7378	16.5117	16.5488	16.4323
Q99M31	Q99M31	Hspa14	Heat shock 70 kDa protein 14	sp|Q99M31|HSP7E_MOUSE Heat shock 70 kDa protein 14 OS=Mus musculus OX=10090 GN=Hspa14 PE=1 SV=2	54.62	7	20.6	15.5025	15.3112	15.6625	15.5964	15.6747	15.5374	15.5802	15.4509	15.5981	15.7657	14.8095	15.2353	15.4358	15.5071	15.6781	15.1604	15.1287	15.6021	15.3202	15.1598	15.4695	15.3227	15.5474	15.3527	15.6536	14.6471	14.4616	14.8015	14.7422	14.816	14.6823	14.7302	14.6038	14.7477	14.9197	13.9723	14.4207	14.5924	14.6511	14.8354	14.3347	14.293
Q9DBY8	Q9DBY8	Nvl	Nuclear valosin-containing protein-like	sp|Q9DBY8|NVL_MOUSE Nuclear valosin-containing protein-like OS=Mus musculus OX=10090 GN=Nvl PE=1 SV=1	94.42	4	4.9	13.0972	13.1586	13.445	13.6822	13.1682	13.4497	13.0216	13.6081	13.6923	13.8352	12.8256	12.8511	13.2262	13.4806	13.314	13.1064	12.7932	13.4626	13.4117	13.0486	13.5342	13.4687	13.6544	13.6066	13.4815	11.4641	11.5314	11.8065	12.0503	11.5319	11.817	11.394	11.9834	12.0642	12.2115	11.2108	11.2588	11.6052	11.8471	11.6937	11.5031	11.1798
Q6P3A8	Q6P3A8	Bckdhb	2-oxoisovalerate dehydrogenase subunit beta, mitochondrial	sp|Q6P3A8|ODBB_MOUSE 2-oxoisovalerate dehydrogenase subunit beta, mitochondrial OS=Mus musculus OX=10090 GN=Bckdhb PE=1 SV=2	42.85	2	7.4	16.0641	16.1643	16.3058	16.1103	15.78	16.0397	15.8272	16.2924	16.2201	16.0784	15.5994	15.8471	15.7645	16.1481	15.9144	15.8427	15.938	15.8177	15.8947	15.4786	15.723	15.9987	15.9928	16.1254	15.7583	16.016	16.1221	16.2522	16.0634	15.7287	15.992	15.7846	16.2527	16.177	16.0396	15.5695	15.8398	15.7284	16.0995	15.8791	15.8243	15.9096
Q91VJ4	Q91VJ4	Stk38	Serine/threonine-protein kinase 38	sp|Q91VJ4|STK38_MOUSE Serine/threonine-protein kinase 38 OS=Mus musculus OX=10090 GN=Stk38 PE=1 SV=1	54.14	2	4.3	13.2807	13.3999	13.607	12.9499	13.2501	13.1208	13.089		13.4785	13.5331	13.1533	13.0517	13.2276	13.5285			13.3565		13.5842	13.0367			13.4696	13.2741		12.5888	12.7138	12.9096	12.2591	12.5549	12.4292	12.4025		12.7915	12.8505	12.4796	12.4005	12.5476	12.8361			12.6843
Q5RJH3	Q5RJH3	Cdh12	Cadherin-12	sp|Q5RJH3|CAD12_MOUSE Cadherin-12 OS=Mus musculus OX=10090 GN=Cdh12 PE=2 SV=1	88.41	6	10.3	13.6171	13.6189	13.3834	13.5874	13.6079	13.568	13.5287	13.8111	13.5127	13.804	13.182	13.2251	13.4059	13.4337	13.5762	13.488	13.1068	13.6069	12.804	13.5813	13.9182	13.9116	13.8653	13.8948	13.9871	12.4815	12.4892	12.2424	12.453	12.4691	12.4328	12.3986	12.6839	12.3822	12.6778	12.0647	12.1303	12.2824	12.2976	12.4534	12.3822	11.9909
Q9D0I4	Q9D0I4	Stx17	Syntaxin-17	sp|Q9D0I4|STX17_MOUSE Syntaxin-17 OS=Mus musculus OX=10090 GN=Stx17 PE=1 SV=1	33.2	4	15.6	14.0324	14.148	14.2297	14.3872	14.2697	14.3031	14.1843	14.2078	14.5058	14.4787	13.838	13.7071	14.2435	14.347	14.4594	13.9631	13.6652	13.8772	14.1851	13.8319	14.3158	14.1053	14.2979	14.2544	14.1404	14.3994	14.5208	14.5912	14.7553	14.6334	14.6703	14.5567	14.5831	14.8777	14.8551	14.2231	14.1148	14.6225	14.7134	14.8391	14.3597	14.0519
P57724	P57724	Pcbp4	Poly(rC)-binding protein 4	sp|P57724|PCBP4_MOUSE Poly(rC)-binding protein 4 OS=Mus musculus OX=10090 GN=Pcbp4 PE=1 SV=1	41.37	2	5.5		11.5083	11.8834	12.4462	12.1495	11.5067	11.5203	12.1745	12.2866	12.0365	11.2278	11.1436	11.6743	12.1479	12.0839	11.6494	11.6214	11.9013	11.3113	11.2653			11.3681	11.9092	11.8462		11.6587	12.0225	12.592	12.2908	11.6516	11.6703	12.3274	12.4362	12.1905	11.3905	11.329	11.8309	12.2919	12.2412	11.8237	11.7856
Q6A058	Q6A058	Armcx2	Armadillo repeat-containing X-linked protein 2	sp|Q6A058|ARMX2_MOUSE Armadillo repeat-containing X-linked protein 2 OS=Mus musculus OX=10090 GN=Armcx2 PE=2 SV=2	80.99	2	2.9	12.6957	12.9138	12.998	12.9708	13.1547	12.9389	12.8311	12.8869	12.9366	12.9361	12.645	12.1791	12.9245	12.8922	13.3058	12.5336	12.666	12.4822	12.6143	12.3919	13.0133	12.8714	13.1017	12.7294	12.6325	11.6476	11.8716	11.9444	11.9239	12.1033	11.8911	11.7885	11.8471	11.8936	11.8974	11.6151	11.1718	11.8885	11.8436	12.2705	11.5152	11.6375
O35926	O35926	Cdk5r2	Cyclin-dependent kinase 5 activator 2	sp|O35926|CD5R2_MOUSE Cyclin-dependent kinase 5 activator 2 OS=Mus musculus OX=10090 GN=Cdk5r2 PE=1 SV=2	38.9	3	10	15.2027	14.6211	15.0939	15.2975	15.4636	15.2284	14.9048	15.5918	15.5528	15.9367	14.7891	14.6735	15.2334	15.4707	15.3277	15.1351	14.5067	15.1588	14.9318	15.039	15.666	15.3255	15.4038	15.5186	15.2861	14.9847	14.409	14.8703	15.0807	15.2424	15.0107	14.6922	15.3821	15.3398	15.728	14.5893	14.4963	15.0275	15.2522	15.1225	14.9468	14.3083
Q922P8	Q922P8	Tmem132a	Transmembrane protein 132A	sp|Q922P8|T132A_MOUSE Transmembrane protein 132A OS=Mus musculus OX=10090 GN=Tmem132a PE=1 SV=2	110.17	6	7.5	15.8274	15.8397	15.7843	15.8406	15.7713	15.7325	15.6392	16.0628	15.8021	16.2778	15.3786	15.3543	15.6854	15.9282	15.6219	15.7003	15.4716	15.9504	15.6519	15.2087	16.1691	15.9454	15.9771	16.1308	16.1857	14.4218	14.44	14.3731	14.4362	14.3624	14.3271	14.2391	14.6655	14.4015	14.8816	13.9912	13.9894	14.2918	14.522	14.2291	14.3244	14.0856
Q9D7W5	Q9D7W5	Med8	Mediator of RNA polymerase II transcription subunit 8	sp|Q9D7W5|MED8_MOUSE Mediator of RNA polymerase II transcription subunit 8 OS=Mus musculus OX=10090 GN=Med8 PE=1 SV=1	29.18	3	13.8	12.1537	12.3396	12.3569	12.3264	12.081	11.8704	11.9414	12.0237	12.2674	12.5969	11.8567	11.8648	11.9695	11.8798	11.9669	12.1292	11.6177	12.1965	11.9973	11.8546	11.5629	12.1778	12.1458	12.4626	12.0673	12.2983	12.49	12.496	12.4722	12.2223	12.0153	12.0914	12.1766	12.4169	12.7508	12.0194	12.0502	12.126	12.0238	12.1242	12.3034	11.7819
Q5DTZ6	Q5DTZ6	Rnf150	RING finger protein 150	sp|Q5DTZ6|RN150_MOUSE RING finger protein 150 OS=Mus musculus OX=10090 GN=Rnf150 PE=2 SV=2	47.98	2	4.3	13.6035	13.5882	13.4904	13.658	13.5335	13.7031	13.0983	13.8247	13.7433	13.8981	13.2218	13.4565	13.4248	13.2934	13.5447	13.7052	13.1588	13.3764	13.1827	13.155	13.2673	13.1292	13.4879	13.468	13.6682	13.9705	13.9611	13.8519	14.0262	13.8972	14.0704	13.4707	14.1999	14.1152	14.2744	13.607	13.8642	13.8038	13.6599	13.9244	14.1019	13.5454
Q9JLR1	Q9JLR1	Sec61a2	Protein transport protein Sec61 subunit alpha isoform 2	sp|Q9JLR1|S61A2_MOUSE Protein transport protein Sec61 subunit alpha isoform 2 OS=Mus musculus OX=10090 GN=Sec61a2 PE=2 SV=3	52.21	4	10.1	14.4059	14.5105	14.5669	14.7762	14.5106	14.6416	14.526	14.9783	14.7677	15.1179	14.0186	14.0236	14.552	14.7244	14.6619	14.6769	14.5309	14.8432	14.0524	14.0963	14.7803	14.8253	14.8765	14.7508	14.9895	14.3578	14.4684	14.5133	14.7294	14.4593	14.5938	14.4834	14.9386	14.7246	15.0791	13.9887	14.0163	14.516	14.6758	14.6266	14.6586	14.5025
Q80WJ7	Q80WJ7	Mtdh	Protein LYRIC	sp|Q80WJ7|LYRIC_MOUSE Protein LYRIC OS=Mus musculus OX=10090 GN=Mtdh PE=1 SV=1	63.81	17	39.4	17.3333	17.5381	17.7491	17.8476	17.6645	17.5327	17.4353	17.5974	17.9147	17.9509	17.0973	16.4268	17.4782	17.8058	17.93	17.4175	17.3502	17.2061	17.6774	17.5559	17.7995	17.7174	17.8887	17.8286	17.4289	16.7002	16.911	17.1106	17.2157	17.0282	16.8999	16.8077	16.9727	17.2867	17.3272	16.4825	15.8345	16.8571	17.1723	17.3098	16.8142	16.7369
F7BWT7	F7BWT7	Tspan15	Tetraspanin-15	sp|F7BWT7|TSN15_MOUSE Tetraspanin-15 OS=Mus musculus OX=10090 GN=Tspan15 PE=1 SV=2	33.05	2	8.2	14.954	15.403	15.2222	15.4041	15.3618	15.1278	15.0843	15.1821	15.5709	15.4094	14.6147	14.5488	15.1859	15.2554	15.2774	15.438	15.3859	15.1661	14.4685	14.761	14.3584	14.798	14.6453	14.663	14.4967	15.321	15.7758	15.5836	15.7723	15.7255	15.495	15.4567	15.5574	15.9428	15.7858	14.9999	14.9566	15.5649	15.6218	15.6572	15.8346	15.7725
P03899	P03899	mt-Nd3	NADH-ubiquinone oxidoreductase chain 3	sp|P03899|NU3M_MOUSE NADH-ubiquinone oxidoreductase chain 3 OS=Mus musculus OX=10090 GN=mt-Nd3 PE=1 SV=3	13.21	2	35.7	15.7267	15.3781	15.0691	16.2266	14.0189	14.9084	15.8117	16.3958	15.9406	15.145	14.0251	15.1857	14.8032	16.0321	15.532	15.6776	15.3796	15.9465	14.5077	14.9154	15.3378	15.5622	15.1379	16.0583	15.9062	18.0937	17.751	17.4305	18.5947	16.3826	17.2757	18.1842	18.7711	18.3126	17.5213	16.4103	17.5934	17.1822	18.3985	17.9117	18.0742	17.7662
Q9JMG1	Q9JMG1	Edf1	Endothelial differentiation-related factor 1	sp|Q9JMG1|EDF1_MOUSE Endothelial differentiation-related factor 1 OS=Mus musculus OX=10090 GN=Edf1 PE=1 SV=1	16.36	3	20.3	14.3887	14.3161	14.3283	14.5165	14.1665	14.3862	14.1278	14.5531	14.7092	14.5982	13.9019	13.6977	14.2906	14.3543	14.3599	14.2833	14.1637	14.3855	14.25	13.7894	14.4698	14.4908	14.6811	14.6312	14.4553	15.1707	15.104	15.1048	15.2997	14.9453	15.1685	14.9153	15.3434	15.4962	15.3896	14.7021	14.5205	15.0846	15.1358	15.1547	15.095	14.9654
Q8BQM8	Q8BQM8	Eml5	Echinoderm microtubule-associated protein-like 5	sp|Q8BQM8|EMAL5_MOUSE Echinoderm microtubule-associated protein-like 5 OS=Mus musculus OX=10090 GN=Eml5 PE=2 SV=2	219.97	8	6.5	14.1855	14.2556		13.9844	14.2571	14.2777	14.4309	14.2081	14.3095	14.3535	13.8209	13.901	14.214	14.2602	14.1298		13.9204	13.9951	13.9993	13.4932	13.8434		14.2539	14.027	14.3294	11.396	11.4719		11.1961	11.4643	11.4884	11.6468	11.4269	11.5249	11.5733	11.0496	11.1522	11.4365	11.4701	11.3531		11.1505
Q2MHE5	Q2MHE5	Dok6	Docking protein 6	sp|Q2MHE5|DOK6_MOUSE Docking protein 6 OS=Mus musculus OX=10090 GN=Dok6 PE=1 SV=1	38.26	2	5.7	13.3913	13.4585	13.3079	13.4597	13.3435	13.4149	13.139	13.515	13.4687	13.6614	13.0896	13.2743	13.2569	13.1272	13.2923	13.4672	12.64	13.3493	13.1854	12.867	13.5488	13.2351	13.662	13.502	13.3347	13.2557	13.3288	13.1669	13.3253	13.2047	13.2796	13.0089	13.3878	13.3382	13.5353	12.9723	13.1795	13.1334	12.9911	13.1695	13.3614	12.5241
Q8CGC4	Q8CGC4	Lsm14b	Protein LSM14 homolog B	sp|Q8CGC4|LS14B_MOUSE Protein LSM14 homolog B OS=Mus musculus OX=10090 GN=Lsm14b PE=1 SV=3	42.28	3	8.3	16.29	16.1984	16.2746	16.53	16.3012	16.119	16.0263	16.5926	16.565	16.7983	15.7427	15.639	16.2191	16.4262	16.3381	16.0898	15.9212	16.2695	16.1924	16.2467	16.379	16.3361	16.4744	16.5949	16.5575	16.4346	16.3489	16.4136	16.6757	16.4425	16.2638	16.1763	16.7455	16.7145	16.9522	15.9055	15.8244	16.3757	16.5702	16.4954	16.264	16.0855
Q9R049	Q9R049	Amfr	E3 ubiquitin-protein ligase AMFR	sp|Q9R049|AMFR_MOUSE E3 ubiquitin-protein ligase AMFR OS=Mus musculus OX=10090 GN=Amfr PE=1 SV=2	73.06	6	18.7	15.0416	14.9951	15.2406	15.1543	14.9777	14.9	14.7512	15.1602	15.2782	15.4897	14.6012	14.5884	14.9621	14.8272	15.1136	14.9839	14.7258	15.067	14.7596	14.7494	15.0734	15.0715	15.0959	15.1393	15.1422	14.1355	14.0949	14.3291	14.2494	14.0683	13.9943	13.8506	14.2625	14.3771	14.593	13.7134	13.7232	14.068	13.9206	14.2203	14.1076	13.8394
P40237	P40237	Cd82	CD82 antigen	sp|P40237|CD82_MOUSE CD82 antigen OS=Mus musculus OX=10090 GN=Cd82 PE=1 SV=1	29.61	4	12.8	17.0899	17.4835	17.1893	17.4692	17.3863	17.3093	17.277	17.2655	17.8315	17.3084	16.6807	16.2928	17.1783	17.4516	17.4143	17.4783	17.4991	17.4081	16.6426	16.9538	16.9527	17.2497	17.1047	17.5516	16.9672	17.5823	17.9819	17.6763	17.9628	17.8755	17.8021	17.7749	17.7663	18.329	17.8103	17.1914	16.8261	17.6828	17.9435	17.9196	18.0005	18.0112
Q9EQC5	Q9EQC5	Scyl1	N-terminal kinase-like protein	sp|Q9EQC5|SCYL1_MOUSE N-terminal kinase-like protein OS=Mus musculus OX=10090 GN=Scyl1 PE=1 SV=1	89.1	9	16.1	14.8695	15.0356	15.2185	15.1748	15.0854	15.1716	15.0344	15.223	15.323	15.4389	14.6168	14.3901	14.964	15.2435	15.1627	14.8986	14.7457	14.9832	15.1083	14.8526	15.1499	15.1685	15.5082	15.2414	15.0319	13.536	13.708	13.8795	13.8425	13.7486	13.8384	13.7064	13.8978	13.9946	14.1148	13.3015	13.0973	13.6425	13.9095	13.842	13.5949	13.4318
Q9R0Q4	Q9R0Q4	Morf4l2	Mortality factor 4-like protein 2	sp|Q9R0Q4|MO4L2_MOUSE Mortality factor 4-like protein 2 OS=Mus musculus OX=10090 GN=Morf4l2 PE=1 SV=1	32.16	5	19.1	11.4895	11.7404	11.8871	11.8741	11.6598	12.106	11.5596	11.917	11.8284	12.2349	10.9551	11.0543	11.7164	11.9576	11.9269	11.5812	11.3431	11.9486	11.5192	11.687	11.9509	11.8371	12.1692	12.1784	11.9427	11.3539	11.6107	11.746	11.7398	11.521	11.9707	11.4295	11.7898	11.6978	12.1087	10.8378	10.9595	11.5929	11.8215	11.8041	11.4753	11.2272
Q8C7J6	Q8C7J6	Kctd12b	Potassium channel tetramerisation domain containing 12b	tr|Q8C7J6|Q8C7J6_MOUSE Potassium channel tetramerisation domain containing 12b OS=Mus musculus OX=10090 GN=Kctd12b PE=1 SV=1	33.26	2	6.5	12.5339	12.9967	13.592	12.9615	13.0268	12.8298	12.5986	12.9165	12.8137	13.0779	12.5656	12.238	12.8384	12.986	12.9953	11.8884	12.6587	12.8032	13.1339	12.6378	12.9803	13.2213	13.5705	13.3453	13.3338	12.6785	13.1472	13.7311	13.1073	13.1681	12.9746	12.7487	13.0694	12.9632	13.2318	12.7284	12.4233	12.995	13.13	13.1527	12.0627	12.823
Q8R3V6	Q8R3V6	Cuedc1	CUE domain-containing protein 1	sp|Q8R3V6|CUED1_MOUSE CUE domain-containing protein 1 OS=Mus musculus OX=10090 GN=Cuedc1 PE=2 SV=2	42.75	5	18	13.1613	13.213	13.7834	13.4702	13.2122	13.3654	13.0326	13.1402	13.6383	13.5108	12.7305	12.6246	13.2611	13.2953	13.3307	13.2635	13.1784	13.3221	12.9818	12.9387	12.8595	13.1729	13.1197	13.053	13.4177	13.3058	13.3635	13.9225	13.616	13.3535	13.5103	13.1827	13.2931	13.7879	13.6648	12.8933	12.81	13.4176	13.4394	13.488	13.4378	13.3426
Q8CHP8	Q8CHP8	Pgp	Glycerol-3-phosphate phosphatase	sp|Q8CHP8|PGP_MOUSE Glycerol-3-phosphate phosphatase OS=Mus musculus OX=10090 GN=Pgp PE=1 SV=1	34.52	9	30.5	16.7277	16.5206	16.7069	16.9238	16.6713	16.3742	16.5025	17.1185	17.09	16.9356	15.9751	16.0194	16.5709	17.0185	16.9094	16.5966	16.4641	16.939	16.1258	16.3518	16.583	16.7239	16.895	17.054	17.0588	16.5097	16.3085	16.4834	16.707	16.45	16.1564	16.29	16.9088	16.877	16.727	15.7753	15.8422	16.3649	16.7999	16.7042	16.4083	16.2658
Q99M28	Q99M28	Rnps1	RNA-binding protein with serine-rich domain 1	sp|Q99M28|RNPS1_MOUSE RNA-binding protein with serine-rich domain 1 OS=Mus musculus OX=10090 GN=Rnps1 PE=1 SV=1	34.19	2	13.8	16.9851	16.6534	16.9671	16.9682	16.5808	16.6292	16.6993	16.8184	17.0194	17.0903	16.5457	15.7539	16.5421	17.1756	17.0903	16.8029	15.8467	16.2549	16.9693	16.8341	17.0052	17.2355	16.8513	17.0169	16.7801	17.352	17.0263	17.3286	17.3364	16.9445	16.9965	17.0717	17.1937	17.3914	17.4666	16.9309	16.1616	16.921	17.5421	17.4701	17.1996	16.2333
A2ARS0	A2ARS0	Ankrd63	Ankyrin repeat domain-containing protein 63	sp|A2ARS0|ANR63_MOUSE Ankyrin repeat domain-containing protein 63 OS=Mus musculus OX=10090 GN=Ankrd63 PE=1 SV=1	41.04	5	16.4	12.8519	13.2421	12.7412	12.827	12.7226	13.1771	12.9583	13.0305	12.9087	13.2185	12.7891	12.803	12.7453	12.7017	13.0787	12.6899	12.8234	12.6741	12.5245	12.2526	13.153	12.5902	13.2512	12.7568	12.79	12.9964	13.3925	12.8803	12.9727	12.8639	13.322	13.1083	13.1834	13.0583	13.3724	12.9519	12.9884	12.9019	12.8457	13.236	12.8642	12.9876
Q3UBZ5	Q3UBZ5	Mif4gd	MIF4G domain-containing protein	sp|Q3UBZ5|MI4GD_MOUSE MIF4G domain-containing protein OS=Mus musculus OX=10090 GN=Mif4gd PE=1 SV=1	25.48	3	16.2	14.5971	14.7382	14.408	14.4414	14.3901	14.6239	14.488	14.5265	14.6429	14.6001	14.1466	13.9418	14.1615	14.4015	14.4521	14.4491	14.599	14.5129	14.0856	14.1126	14.2699	14.2222	14.0549	14.2756	14.1194	14.7416	14.8886	14.5471	14.5872	14.5314	14.7688	14.638	14.6794	14.7925	14.754	14.3094	14.1272	14.3181	14.5456	14.6094	14.6234	14.7632
Q9JKC8	Q9JKC8	Ap3m1	AP-3 complex subunit mu-1	sp|Q9JKC8|AP3M1_MOUSE AP-3 complex subunit mu-1 OS=Mus musculus OX=10090 GN=Ap3m1 PE=1 SV=1	46.91	6	17.5	14.4263	14.6459	14.7008	14.327	14.3176	14.451	14.6266	14.6629	14.5458	14.6425	14.1422	14.494	14.2642	14.6188	14.2096	14.1185	14.6868	14.659	14.2635	13.2966	14.4661	14.4625	14.5507	14.5541	14.6473	13.9187	14.1442	14.1878	13.8207	13.8068	13.9438	14.1245	14.1637	14.0433	14.1444	13.6529	14.0273	13.7687	14.1108	13.7148	13.6407	14.1989
Q8BFY6	Q8BFY6	Pef1	Peflin	sp|Q8BFY6|PEF1_MOUSE Peflin OS=Mus musculus OX=10090 GN=Pef1 PE=1 SV=1	29.21	5	27.6	16.6204	16.6081	16.4889	16.7461	16.7005	16.5771	16.3932	17.0225	16.8821	16.8686	15.911	16.0493	16.5309	16.5678	16.8041	16.6943	16.3312	16.7577	16.5701	16.0995	16.6174	16.6572	16.7736	16.7332	16.8228	17.7649	17.7586	17.6279	17.8919	17.8418	17.722	17.5433	18.1754	18.0317	18.0225	17.0738	17.2346	17.6875	17.7119	17.9614	17.8686	17.4954
Q5EBH1	Q5EBH1	Rassf5	Ras association domain-containing protein 5	sp|Q5EBH1|RASF5_MOUSE Ras association domain-containing protein 5 OS=Mus musculus OX=10090 GN=Rassf5 PE=1 SV=1	46.68	3	9.2	13.2567	13.3063	13.2755	13.4273	13.2917	12.8875	13.2685	13.6663	13.2543	13.397	12.7616	12.7608	13.1848	13.2272	13.3703	12.8595	12.8753	13.2966	12.9934	13.1101	13.114	13.1803	13.1892	13.519	13.3791	12.5648	12.6203	12.578	12.7365	12.5965	12.1959	12.582	12.9827	12.5674	12.7145	12.0878	12.1096	12.5049	12.5347	12.6912	12.1973	12.203
Q6NZN0	Q6NZN0	Rbm26	RNA-binding protein 26	sp|Q6NZN0|RBM26_MOUSE RNA-binding protein 26 OS=Mus musculus OX=10090 GN=Rbm26 PE=1 SV=2	114.07	9	10	14.0867	14.2671	14.2394	14.3365	14.1931	14.2377	14.1031	14.3708	14.5279	14.5682	13.6253	13.9529	14.314	14.2699	14.1989	13.7198	13.8333	14.0348	14.2446	14.1475	14.3517	14.4413	14.718	14.4285	14.4397	12.9512	13.1375	13.0984	13.2021	13.0543	13.1024	12.9731	13.2436	13.3973	13.442	12.5079	12.8581	13.1905	13.1339	13.0762	12.6139	12.7174
Q60675	Q60675	Lama2	Laminin subunit alpha-2	sp|Q60675|LAMA2_MOUSE Laminin subunit alpha-2 OS=Mus musculus OX=10090 GN=Lama2 PE=1 SV=2	343.59	17	7.1	14.43	14.3887	14.7004	14.4468	14.5663	14.4367	14.2726	14.4791	14.938	14.7237	13.9193	13.801	14.4872	15.4027	15.1068	14.0675	14.0608	14.1335	14.263	13.5566	14.6939	14.4929	14.7999	14.8688	14.8518	11.042	11.0067	11.307	11.0601	11.1751	11.049	10.8901	11.0995	11.555	11.3451	10.5496	10.4538	11.1113	12.0143	11.7316	10.7093	10.6925
Q9WVB4	Q9WVB4	Slit3	Slit homolog 3 protein	sp|Q9WVB4|SLIT3_MOUSE Slit homolog 3 protein OS=Mus musculus OX=10090 GN=Slit3 PE=2 SV=2	167.62	4	3.3	13.5401	13.2907	13.3788	13.4449	13.3319	12.8543	13.1952	13.1738	13.3135	13.3661	13.4052	13.09	13.3258	13.0699	13.138	12.8651	12.6257	12.9328	12.7748	13.0797	13.0503	13.2337	13.7942	13.3876	13.5224	11.3423	11.0987	11.1755	11.2483	11.1309	10.6568	11.0028	10.9843	11.1207	11.1777	11.2256	10.9329	11.14	10.8716	10.9529	10.697	10.4476
Q5SZV5	Q5SZV5	Kiaa0319	Dyslexia-associated protein KIAA0319 homolog	sp|Q5SZV5|K0319_MOUSE Dyslexia-associated protein KIAA0319 homolog OS=Mus musculus OX=10090 GN=Kiaa0319 PE=1 SV=1	117.91	6	8.4	11.7678	11.5634	11.7041	12.5019	11.3552	11.3056	11.1319	11.8937	11.8202	12.2802	10.8025	11.1187	11.7289	11.9147	11.6393	11.3489	11.2587	12.0771	11.3322	11.5211	11.604	11.8171	11.7971	11.8623	11.8254	10.4718	10.2733	10.4026	11.2071	10.0559	10.0099	9.84135	10.606	10.5292	10.9936	9.52475	9.86348	10.4449	10.6182	10.356	10.0826	9.98231
Q8CFJ9	Q8CFJ9	Wdr24	GATOR2 complex protein WDR24	sp|Q8CFJ9|WDR24_MOUSE GATOR2 complex protein WDR24 OS=Mus musculus OX=10090 GN=Wdr24 PE=1 SV=1	88.13	4	6.2	14.265	14.5901	14.421	14.3831	14.623	14.2097	14.4224	14.5864	14.6879	14.9003	13.8185	13.9361	14.3654	14.4327	14.4786	14.3009	14.3906	14.4551	14.1558	14.1755	14.245	14.3377	14.3655	14.4762	14.6341	13.0876	13.4186	13.2381	13.2069	13.4424	13.0327	13.2505	13.4174	13.5156	13.7324	12.6594	12.7995	13.2001	13.2548	13.314	13.1532	13.2329
Q8BS40	Q8BS40	Cptp	Ceramide-1-phosphate transfer protein	sp|Q8BS40|CPTP_MOUSE Ceramide-1-phosphate transfer protein OS=Mus musculus OX=10090 GN=Cptp PE=1 SV=1	24.58	2	13.4	12.8477	13.0227	13.113	13.1259	13.0332	12.9013	13.214	13.3438	12.9502	12.6117	12.566	12.8759	12.7418	12.4963	12.8842	12.864	12.9019	13.094	12.5932	12.5677	12.808	12.9128	12.5992	12.5286	13.0114	13.3402	13.521	13.6	13.6196	13.5224	13.3941	13.712	13.8446	13.4477	13.1136	13.0767	13.4092	13.2464	12.9883	13.3894	13.3862	13.414
Q8K224	Q8K224	Nat10	RNA cytidine acetyltransferase	sp|Q8K224|NAT10_MOUSE RNA cytidine acetyltransferase OS=Mus musculus OX=10090 GN=Nat10 PE=1 SV=1	115.35	7	8.4	12.9928	13.2866	13.6447	13.6559	13.5435	13.4306	13.2242	13.6769	13.694	13.7043	12.8177	12.5402	13.2382	13.8397	13.5959	12.9209	13.2156	13.0584	13.6294	13.4193	13.6397	13.5194	13.6511	13.7065	13.2876	11.1898	11.4896	11.8362	11.8541	11.7372	11.6279	11.4267	11.8823	11.8961	11.9107	11.033	10.778	11.4473	12.0362	11.8057	11.1476	11.4323
Q7TMV3	Q7TMV3	Fastkd5	FAST kinase domain-containing protein 5, mitochondrial	sp|Q7TMV3|FAKD5_MOUSE FAST kinase domain-containing protein 5, mitochondrial OS=Mus musculus OX=10090 GN=Fastkd5 PE=2 SV=1	86.54	3	5.2	11.5051	11.7883	11.5303	11.2963	11.2973	11.1564	11.1378	11.6426	11.4903	11.7531	11.3577		11.4153	11.5588	11.2026	11.4434	11.2834	11.4329	11.5822	10.6048	11.7089	10.9552	11.4672	11.4812	11.5351	10.1351	10.4242	10.1548	9.92747	9.92398	9.78671	9.77323	10.2809	10.1253	10.3925	10.0059		10.0574	10.1883	9.84537	10.1031	9.93301
Q9CV28	Q9CV28	Mindy3	Ubiquitin carboxyl-terminal hydrolase MINDY-3	sp|Q9CV28|MINY3_MOUSE Ubiquitin carboxyl-terminal hydrolase MINDY-3 OS=Mus musculus OX=10090 GN=Mindy3 PE=1 SV=2	49.58	2	5.6	14.6822	14.2802	14.3424	14.4934	14.6169	14.3001	14.3999	14.7903	14.7619	14.3184	13.9319	14.036	14.339	14.3324	14.6323	14.3486	14.1358	14.2468	14.1177	14.2919	14.1918	14.2739	13.9104	14.3235	14.3893	14.4642	14.0681	14.1188	14.2765	14.3956	14.0824	14.1874	14.5806	14.5489	14.1097	13.7322	13.8588	14.133	14.1139	14.4271	14.1603	13.9375
Q9Z2N8	Q9Z2N8	Actl6a	Actin-like protein 6A	sp|Q9Z2N8|ACL6A_MOUSE Actin-like protein 6A OS=Mus musculus OX=10090 GN=Actl6a PE=1 SV=2	47.42	6	20.7	15.0255	15.2272	15.3235	15.2798	15.0691	15.0952	14.9802	15.1909	15.5013	15.2909	14.1834	14.6377	15.2365	15.112	15.1768	15.1856	14.9495	15.115	15.0726	14.7426	15.2866	15.4122	15.3886	15.4849	15.3362	14.6555	14.8631	14.948	14.911	14.6958	14.7255	14.6157	14.8292	15.1363	14.9303	13.8316	14.3085	14.8785	14.7415	14.8195	14.8453	14.5991
Q9QYT7	Q9QYT7	Pigq	Phosphatidylinositol N-acetylglucosaminyltransferase subunit Q	sp|Q9QYT7|PIGQ_MOUSE Phosphatidylinositol N-acetylglucosaminyltransferase subunit Q OS=Mus musculus OX=10090 GN=Pigq PE=1 SV=3	66.22	2	3.3	11.8619	11.6309	12.4246	12.2946	11.6968	11.6516	11.936	12.2968	12.2598	12.4033	11.6462	11.1916	11.8502	12.277	12.2495	11.9548		12.5792	11.9733	11.568	12.0978	12.0477	12.6879	12.3164	12.3322	11.3544	11.1293	11.9116	11.7883	11.186	11.1443	11.4339	11.7976	11.7573	11.9051	11.1569	10.7249	11.3547	11.7689	11.7548	11.477
P98195	P98195	Atp9b	Probable phospholipid-transporting ATPase IIB	sp|P98195|ATP9B_MOUSE Probable phospholipid-transporting ATPase IIB OS=Mus musculus OX=10090 GN=Atp9b PE=1 SV=4	128.93	5	4.7	14.6914	14.8012	14.8492	14.7777	14.7218	14.6832	14.6375	15.0035	15.0494	15.0263	14.2095	14.1783	14.6929	14.8482	14.9281	14.4382	14.6685	15.0073	14.3697	14.3307	14.4787	14.3012	14.5603	14.5495	14.9438	12.8104	12.9262	12.9627	12.8979	12.8375	12.8025	12.762	13.1308	13.1735	13.1547	12.3468	12.3381	12.824	12.9667	13.0599	12.5869	12.8072
Q9JI44	Q9JI44	Dmap1	DNA methyltransferase 1-associated protein 1	sp|Q9JI44|DMAP1_MOUSE DNA methyltransferase 1-associated protein 1 OS=Mus musculus OX=10090 GN=Dmap1 PE=1 SV=1	53.1	4	12.6	14.1693	14.3329	14.5832	14.5212	14.5309	14.5049	14.4851	14.7454	14.7452	14.5917	14.1083	13.9373	14.6085	14.7088	14.8571	14.0127	13.9814	13.9382	14.3036	14.1863	14.3634	14.4857	14.8435	14.6998	14.59	13.4774	13.6468	13.8858	13.8304	13.8357	13.8133	13.7986	14.0618	14.0583	13.9091	13.4346	13.2862	13.9286	14.0163	14.1779	13.3504	13.3092
Q9WVD5	Q9WVD5	Slc25a15	Mitochondrial ornithine transporter 1	sp|Q9WVD5|ORNT1_MOUSE Mitochondrial ornithine transporter 1 OS=Mus musculus OX=10090 GN=Slc25a15 PE=1 SV=1	32.8	3	12.3	13.1115	13.0673	12.8864	13.0319	12.7371	12.9336	13.1093	13.029	13.1279	12.9008	12.3741	12.6063	12.6218	12.8311	12.9766	13.1742	12.6696	13.0081	12.6537	12.4533	13.1345	12.9449	12.7876	12.9316	13.4245	12.9759	12.9376	12.7453	12.8975	12.5983	12.7983	12.9792	12.9018	12.9973	12.7746	12.2568	12.5115	12.4983	12.6951	12.8539	13.0683	12.5537
[truncated: 7,229 more rows]
[truncated: 151 more columns]
