# Supplementary material
Source: Research Square preprint supplement (doi:10.21203/rs.3.rs-9541548/v1)
Supplement: Supplementary file 2 [file e944460c3a1fc53821cd16d2.docx]

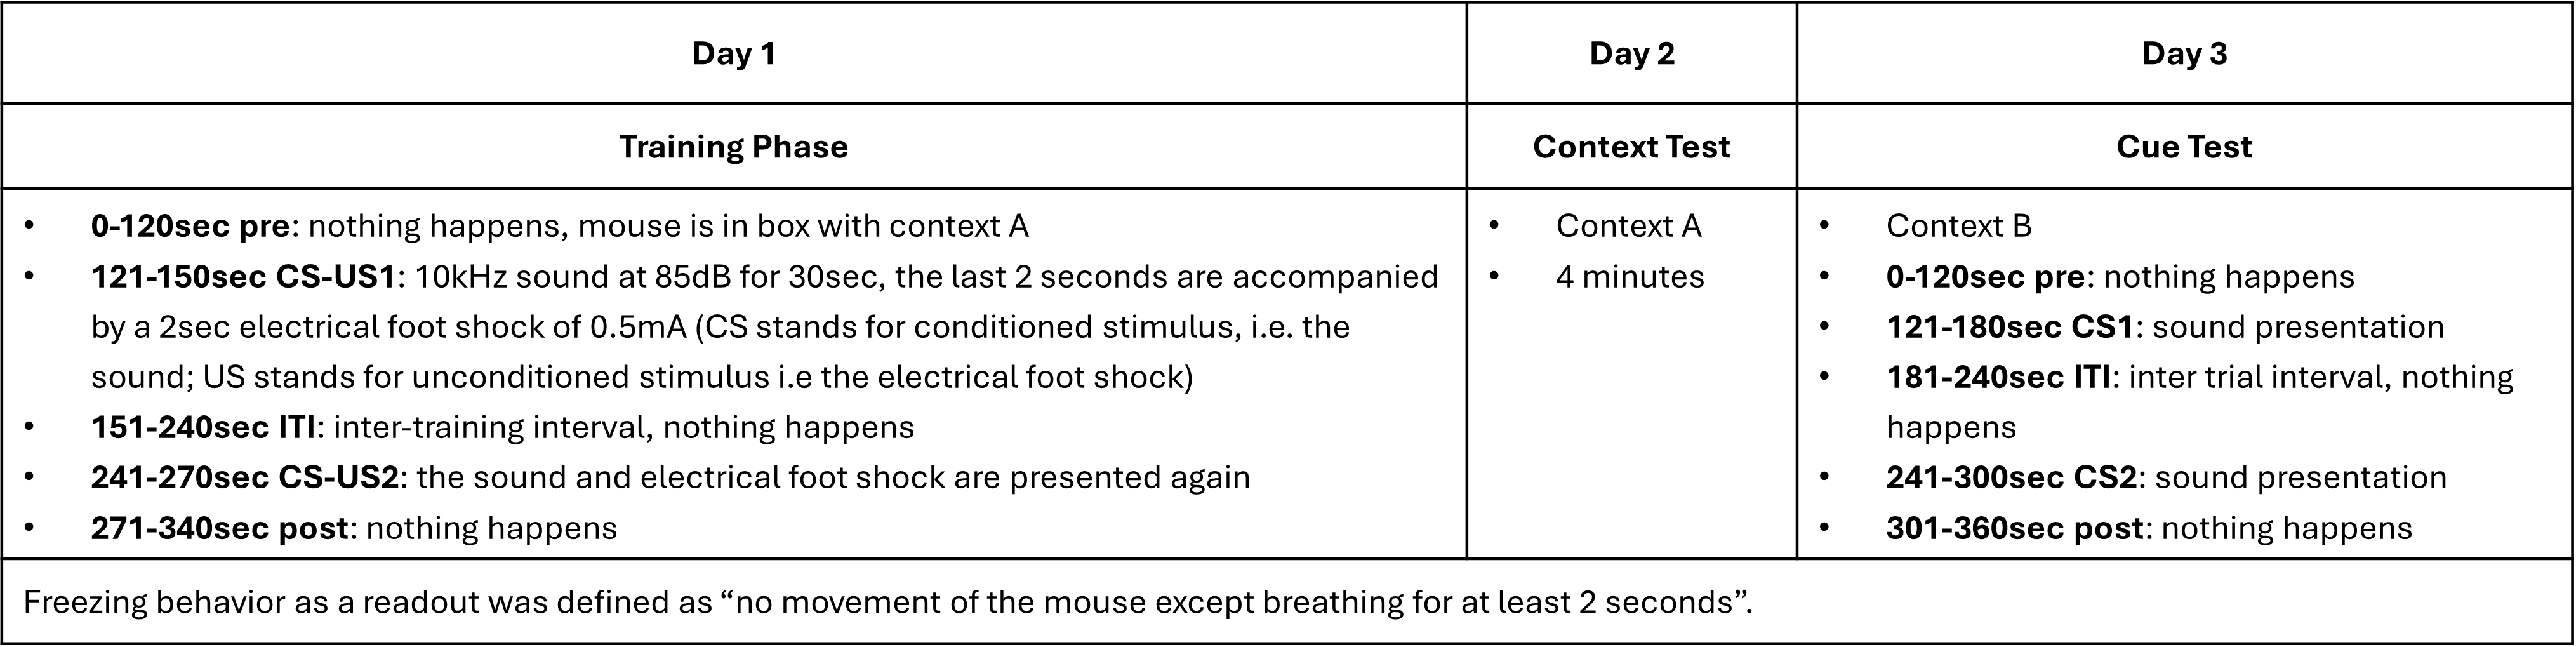


**Supplemental Table 3:** detailed schedule for the contextual and cue fear conditioning test regimen
