# Supplementary material
Source: Research Square preprint supplement (doi:10.21203/rs.3.rs-9541548/v1)
Supplement: Supplementary file 3 [file c5eb7fe9c9ea6899ee778a8f.xlsx]

## Sheet: Tabelle1
		Analysis 0.4mg					Analysis 2.0mg					Analysis combined (active/Placebo)
#	gene name	pval_0.4mg	-log10 pval_0.4mg	est,0.4mg	log 2 [fc0.4]	fc0.4	pval,2mg	-log10 pval_2mg	est,2mg	log 2 [fc2]	fc2	pval,ap	-log10 pval_ap	est,ap	log 2 [fcap]	fcap
1903	Ypel5	0.00110052	2.9584	4.0256	0.484613	1.39921	0.00321523	2.49279	3.50126	0.549319	1.4634	1.09784e-05	4.95946	-6.13617	0.661976	1.58225
4868	Ccdc28a	0.00298185	2.52551	3.53798	0.354723	1.27874	0.00444744	2.35189	3.34315	0.368434	1.29095	1.51652e-05	4.81915	-5.97162	0.503669	1.41781
2543	Lmf1	0.00544177	2.26426	3.24473	0.505195	1.41932	0.000799673	3.09709	4.18315	0.619983	1.53686	4.14771e-05	4.38219	-5.47023	0.552719	1.46685
1542	Ppp3cc	0.0170982	1.76705	2.68098	0.348858	1.27355	0.000292635	3.53367	4.68611	0.562024	1.47634	0.000149274	3.82602	-4.85279	0.433604	1.3506
4771	Tmt1a	0.000907729	3.04204	4.12051	0.593691	1.5091	0.0162399	1.78942	2.70668	0.475317	1.39022	0.000173334	3.76112	-4.78199	0.595229	1.51071
5636	Pus7	0.00328533	2.48342	3.49075	0.23549	1.17731	0.00115771	2.9364	4.00068	0.261273	1.19854	0.000240734	3.61846	-4.62715	0.209995	1.15668
2926	Hykk	0.0100092	1.9996	2.94626	0.230984	1.17363	0.00325858	2.48697	3.49473	0.25757	1.19546	0.000240861	3.61823	-4.6269	0.229005	1.17203
2199	Pex7	0.00656771	2.18259	3.15287	0.476489	1.39135	0.00288124	2.54042	3.55471	0.528664	1.44259	0.000294194	3.53137	-4.53309	0.455406	1.37117
1402	Cd81	0.0162265	1.78978	2.70709	0.487323	1.40184	0.00932485	2.03036	2.98109	0.506283	1.42039	0.000324683	3.48854	-4.48696	0.508301	1.42237
4624	Phactr3	0.0179952	1.74484	2.65543	0.206272	1.1537	0.00014414	3.84122	5.04866	0.356804	1.28059	0.000338553	3.47037	-4.46741	0.248346	1.18784
1556	Nr2c2	0.0305599	1.51485	2.38754	0.391139	1.31143	0.00747857	2.12618	3.08932	0.458332	1.37395	0.000359646	3.44412	-4.4392	0.447747	1.36391
1636	Tia1	0.00395162	2.40322	3.40076	0.226993	1.17039	0.0218568	1.66041	2.55781	0.199023	1.14792	0.000387997	3.41117	-4.40381	0.233262	1.17549
15	Gm8797	0.12686	0.896676	1.61631	0.182222	1.13463	0.0034977	2.45622	3.46022	0.325404	1.25302	0.000441036	3.35553	-4.34415	0.322652	1.25063
923	mt-Co3	0.0171241	1.76639	2.68022	0.368469	1.29098	0.00872652	2.05916	3.01366	0.475188	1.3901	0.000494332	3.30598	-4.29112	0.450787	1.36679
2462	Echdc2	0.0382248	1.41765	2.27214	0.211884	1.1582	0.0036459	2.4382	3.44	0.238301	1.1796	0.000534749	3.27185	-4.25464	0.204072	1.15195
7484	Usp21	0.160982	0.793222	1.47466	0.20253	1.15071	0.00131444	2.88126	3.93832	0.369879	1.29224	0.000542549	3.26556	-4.24792	0.329498	1.25658
2565	Yipf3	0.036608	1.43642	2.29455	0.218333	1.16339	0.0314285	1.50268	2.37317	0.20425	1.15209	0.000553469	3.25691	-4.23868	0.253399	1.19201
4478	Ap3s2	0.012795	1.89296	2.82509	0.312916	1.24222	0.0143681	1.8426	2.7676	0.296189	1.2279	0.000584587	3.23315	-4.21331	0.299578	1.23078
4084	Ccdc50	0.0286904	1.54226	2.41982	0.165375	1.12146	0.0108174	1.96588	2.90801	0.192514	1.14275	0.000687065	3.163	-4.13851	0.183437	1.13559
383	Trip11	0.0971735	1.01245	1.76925	0.311821	1.24127	0.0171592	1.7655	2.6792	0.353056	1.27726	0.00068751	3.16272	-4.13821	0.398874	1.31848
400	Usp31	0.0248693	1.60434	2.49254	0.388835	1.30934	0.0100401	1.99826	2.94474	0.389033	1.30952	0.000704269	3.15226	-4.12707	0.364314	1.28727
5909	Sf3b5	0.000762711	3.11764	4.20657	0.936832	1.91432	0.041408	1.38292	2.23051	0.60538	1.52138	0.000706584	3.15084	-4.12555	0.838415	1.78808
2820	Ipcef1	0.0858156	1.06643	1.83886	0.216748	1.16211	0.00804587	2.09443	3.0535	0.395123	1.31505	0.000713374	3.14668	-4.12113	0.379957	1.3013
6341	Gadd45gip1	0.159534	0.797146	1.48013	0.137906	1.10031	0.0198197	1.7029	2.60703	0.271281	1.20688	0.000719674	3.14286	-4.11706	0.354923	1.27892
644	Myadm	0.0189394	1.72263	2.62982	0.332036	1.25879	0.0472881	1.32525	2.16089	0.312703	1.24203	0.000720036	3.14265	-4.11683	0.407482	1.32637
531	Ercc2	0.0137215	1.8626	2.79045	0.433145	1.35017	0.0157821	1.80183	2.72092	0.435454	1.35234	0.000769164	3.11398	-4.08631	0.434671	1.3516
4902	Tbc1d14	0.0655977	1.18311	1.9862	0.283996	1.21756	0.024166	1.61679	2.50707	0.304802	1.23525	0.000879553	3.05574	-4.02436	0.33914	1.265
6033	Ciao1	0.0489257	1.31046	2.14293	0.335639	1.26194	0.0401543	1.39627	2.24653	0.308077	1.23806	0.000962088	3.01679	-3.98296	0.376311	1.29802
3969	Tmcc2	0.0900441	1.04554	1.81204	0.248528	1.18799	0.0244	1.61261	2.50219	0.249501	1.1888	0.00104959	2.97898	-3.9428	0.276951	1.21163
2857	Mrm3	0.219014	0.659527	1.28285	0.211366	1.15778	0.0123195	1.90941	2.84382	0.359929	1.28336	0.00105006	2.97879	-3.9426	0.400607	1.32006
3929	Suz12	0.035141	1.45419	2.31569	0.397509	1.31723	0.0838926	1.07628	1.85145	0.335511	1.26182	0.00107616	2.96812	-3.93128	0.506297	1.4204
1698	Atp5mpl	0.118289	0.927055	1.65696	0.357903	1.28156	0.018892	1.72372	2.63107	0.408787	1.32757	0.00110849	2.95527	-3.91763	0.43762	1.35437
4156	Dnaaf10	0.000163297	3.78702	4.9842	0.499975	1.41419	0.00663619	2.17808	3.1478	0.309749	1.23949	0.00110884	2.95513	-3.91748	0.309248	1.23906
2154	Arhgef28	0.072964	1.13689	1.92831	0.210947	1.15745	0.0211917	1.67383	2.57338	0.270702	1.20639	0.0011179	2.9516	-3.91373	0.28323	1.21692
4979	Mark4	0.122504	0.911851	1.63667	0.191466	1.14192	0.00250888	2.60052	3.62219	0.334197	1.26068	0.00116603	2.93329	-3.8943	0.268991	1.20496
1885	Snrpf	0.0368217	1.4339	2.29153	0.463741	1.37911	0.026543	1.57605	2.45946	0.404374	1.32351	0.0011845	2.92646	-3.88705	0.427205	1.34463
1147	Kcna3	0.112216	0.949947	1.68734	0.332895	1.25954	0.0206646	1.68477	2.58605	0.449654	1.36571	0.00123313	2.90899	-3.86851	0.477491	1.39232
3992	Csl	0.0359811	1.44393	2.30348	0.294114	1.22613	0.00748381	2.12588	3.08898	0.392121	1.31232	0.00124703	2.90412	-3.86335	0.332261	1.25898
4765	Tdrp	0.092829	1.03232	1.79498	0.287968	1.22092	0.000195426	3.70902	4.89186	0.603676	1.51958	0.00127192	2.89554	-3.85424	0.402443	1.32174
2652	Gpr162	0.136823	0.86384	1.57191	0.205132	1.15279	0.00349941	2.45601	3.45998	0.371653	1.29383	0.00127929	2.89303	-3.85158	0.308	1.23799
1864	Usp46	0.0625594	1.20371	2.01182	0.477341	1.39218	0.128285	0.891825	1.60978	0.438108	1.35483	0.00127977	2.89287	-3.85141	0.81846	1.76352
1498	Brcc3	0.0530942	1.27495	2.09961	0.539111	1.45308	0.105782	0.97559	1.72113	0.519458	1.43342	0.00129526	2.88764	-3.84586	0.854796	1.8085
3637	Jpt2	0.0132387	1.87815	2.8082	0.229451	1.17239	0.0165699	1.78068	2.69664	0.225326	1.16904	0.00134142	2.87243	-3.82973	0.213863	1.15979
7157	Cldn12	0.0574079	1.24103	2.05796	0.374519	1.29641	0.101371	0.994088	1.74534	0.355317	1.27927	0.00137223	2.86257	-3.81927	0.56828	1.48275
4439	Rab11fip4	0.0572413	1.24229	2.05951	0.281263	1.21526	0.00349803	2.45618	3.46018	0.381611	1.3028	0.00137371	2.8621	-3.81877	0.296903	1.2285
4752	Tbl3	0.0272527	1.56459	2.44604	0.287641	1.22064	0.0937937	1.02783	1.78918	0.186662	1.13813	0.00137534	2.86159	-3.81823	0.278579	1.213
3000	Arhgef2	0.0422338	1.37434	2.22019	0.255721	1.19393	0.00149737	2.82467	3.87442	0.347429	1.27229	0.0014176	2.84845	-3.80428	0.248082	1.18763
6108	Ddx50	0.168005	0.774679	1.44869	0.481277	1.39598	0.0350123	1.45578	2.31759	0.577193	1.49194	0.00145169	2.83813	-3.79334	0.71247	1.63861
484	Capn2	0.0608372	1.21583	2.02684	0.225338	1.16905	0.0153339	1.81435	2.73526	0.230705	1.17341	0.00145649	2.83669	-3.79182	0.216448	1.16187
6992	Ap3s1	0.0510402	1.29209	2.12055	0.364353	1.2873	0.0538263	1.26901	2.09233	0.446891	1.3631	0.0015214	2.81776	-3.77174	0.549442	1.46352
5147	Cystm1	0.078577	1.1047	1.88763	0.238278	1.17958	0.0760677	1.1188	1.90549	0.216948	1.16227	0.00152145	2.81774	-3.77172	0.308194	1.23816
4914	Gnal	0.11721	0.931037	1.66226	0.111398	1.08027	0.018059	1.74331	2.65366	0.200128	1.1488	0.00152413	2.81698	-3.77091	0.199999	1.1487
6302	Retreg3	0.0264493	1.57759	2.46126	0.460229	1.37576	0.0155838	1.80733	2.72722	0.460525	1.37604	0.00152569	2.81653	-3.77044	0.424213	1.34184
5525	Bloc1s4	0.0833106	1.0793	1.85531	0.261441	1.19868	0.0207156	1.6837	2.58481	0.281849	1.21575	0.00153635	2.81351	-3.76723	0.281423	1.21539
6977	Mrpl32	0.0247363	1.60667	2.49526	0.332269	1.25899	0.0743752	1.12857	1.91783	0.28858	1.22144	0.00160853	2.79357	-3.74609	0.384424	1.30534
7719	Eif2s3x	0.0524371	1.28036	2.10623	0.189304	1.14021	0.00454012	2.34293	3.33309	0.262241	1.19934	0.00161194	2.79265	-3.74511	0.205226	1.15287
3789	Celf6	0.0925135	1.03379	1.79689	0.172839	1.12727	0.029929	1.52391	2.39822	0.19565	1.14524	0.00164142	2.78478	-3.73677	0.2103	1.15693
3666	Uqcc4	0.0735371	1.13349	1.92403	0.326904	1.25432	0.0587194	1.23122	2.04586	0.294072	1.2261	0.00164863	2.78288	-3.73475	0.373046	1.29508
7253	Cryba4	0.0302301	1.51956	2.39309	0.394413	1.31441	0.0190763	1.71951	2.62621	0.409858	1.32855	0.00165573	2.78101	-3.73277	0.387569	1.30819
2492	Zfyve27	0.154914	0.809909	1.49787	0.215754	1.16131	0.045137	1.34547	2.18537	0.254237	1.1927	0.00180309	2.74398	-3.6935	0.315199	1.24418
6584	Exosc7	0.0181344	1.7415	2.65157	0.418937	1.33694	0.0102792	1.98804	2.93316	0.42511	1.34268	0.00182775	2.73808	-3.68725	0.36046	1.28383
7224	Plscr3	0.0279792	1.55317	2.43263	0.640527	1.5589	0.00745018	2.12783	3.09118	0.773763	1.70972	0.00185329	2.73206	-3.68086	0.626092	1.54338
7162	Tssc4	0.0491261	1.30869	2.14077	0.249511	1.1888	0.044831	1.34842	2.18894	0.187749	1.13898	0.00189493	2.72241	-3.67062	0.211379	1.15779
2455	Fam98a	0.0499846	1.30116	2.13161	0.186619	1.13809	0.0112997	1.94693	2.8865	0.239196	1.18033	0.00191217	2.71847	-3.66645	0.205377	1.15299
1385	Rab22a	0.0660032	1.18044	1.98287	0.199962	1.14867	0.083878	1.07635	1.85155	0.168758	1.12409	0.00198133	2.70304	-3.65009	0.231917	1.17439
3623	Nyap1	0.285261	0.544758	1.10812	0.123619	1.08946	0.0360591	1.44299	2.30236	0.251483	1.19043	0.00203511	2.69141	-3.63775	0.320499	1.24876
318	Klhl3	0.00630697	2.20018	3.17267	0.329734	1.25678	0.00506337	2.29556	3.27989	0.305533	1.23588	0.00206006	2.68612	-3.63214	0.238204	1.17952
6859	Appbp2	0.0697545	1.15643	1.95285	0.263637	1.2005	0.00268146	2.57163	3.58975	0.421518	1.33934	0.00206057	2.68601	-3.63202	0.307585	1.23763
2952	Adora1	0.0510902	1.29166	2.12003	0.4292	1.34649	0.0680588	1.16712	1.96624	0.3393	1.26514	0.00210363	2.67703	-3.6225	0.424546	1.34215
5454	Zcchc18	0.0737412	1.13229	1.92251	0.38198	1.30313	0.0219511	1.65854	2.55564	0.414316	1.33267	0.00214451	2.66867	-3.61363	0.395579	1.31547
5601	Rbm42	0.100515	0.997768	1.75014	0.371913	1.29407	0.0115641	1.93689	2.87508	0.503593	1.41774	0.00215431	2.66669	-3.61153	0.438152	1.35487
3403	Tmcc1	0.144979	0.838694	1.53757	0.167171	1.12285	0.0183009	1.73753	2.647	0.214463	1.16027	0.00215708	2.66613	-3.61094	0.206354	1.15377
3577	Ttbk1	0.105707	0.975896	1.72153	0.315659	1.24458	0.0137058	1.8631	2.79102	0.411749	1.3303	0.00216191	2.66516	-3.60991	0.36847	1.29098
5197	Dusp19	0.132125	0.879016	1.59249	0.479643	1.3944	0.108462	0.964721	1.70684	0.432821	1.34987	0.0021993	2.65772	-3.60201	0.691243	1.61467
2441	Ttyh2	0.250915	0.600473	1.19427	0.195032	1.14475	0.0210692	1.67635	2.5763	0.330244	1.25723	0.00220358	2.65687	-3.60111	0.349335	1.27397
1960	Thra	0.125947	0.899812	1.62052	0.202435	1.15064	0.0202488	1.6936	2.59627	0.279691	1.21393	0.00227112	2.64376	-3.5872	0.268625	1.20466
6096	Hspa14	0.143743	0.842413	1.54266	0.216301	1.16175	0.0294296	1.53122	2.40683	0.253303	1.19193	0.00232723	2.63316	-3.57595	0.264251	1.20101
3009	Coq8a	0.281186	0.551006	1.11792	0.0775303	1.05521	0.0461588	1.33575	2.17361	0.12068	1.08725	0.00233799	2.63116	-3.57383	0.158007	1.11574
7235	Tamalin	0.095916	1.01811	1.77659	0.198742	1.1477	0.0244562	1.61161	2.50103	0.25155	1.19049	0.00234687	2.62951	-3.57208	0.244872	1.18499
1309	Max	0.185914	0.730687	1.38631	0.180524	1.1333	0.0695802	1.15751	1.95422	0.218512	1.16353	0.00235445	2.62811	-3.5706	0.300385	1.23147
2058	Fgf14	0.0232121	1.63429	2.52744	0.330153	1.25715	0.0840714	1.07535	1.85027	0.208015	1.1551	0.00235727	2.62759	-3.57004	0.272677	1.20805
111	Cwc22rt5	0.184699	0.733535	1.39038	0.24196	1.1826	0.117351	0.930514	1.66157	0.230667	1.17338	0.00240964	2.61805	-3.55992	0.396858	1.31664
5303	Ap3m2	0.143535	0.843042	1.54353	0.2106	1.15717	0.00878593	2.05621	3.01033	0.353684	1.27782	0.00241142	2.61773	-3.55958	0.298186	1.2296
7237	Paqr4	0.00477759	2.32079	3.30823	0.335089	1.26146	0.105834	0.975374	1.72084	0.210841	1.15736	0.00241178	2.61766	-3.55951	0.313635	1.24283
4859	Klhl11	0.0610563	1.21427	2.02491	0.248027	1.18758	0.0255809	1.59208	2.47823	0.253161	1.19182	0.00255534	2.59255	-3.53285	0.241464	1.18219
5496	Tbc1d19	0.122698	0.911163	1.63575	0.334644	1.26107	0.0444071	1.35255	2.19393	0.414551	1.33288	0.00259037	2.58664	-3.52658	0.461757	1.37722
6507	Antxr1	0.0268766	1.57063	2.45311	0.887281	1.84969	0.0719426	1.14301	1.93601	0.665274	1.58587	0.00263788	2.57874	-3.5182	0.813537	1.75751
4125	Nelfa	0.182895	0.737798	1.39647	0.268014	1.20415	0.0168666	1.77297	2.68779	0.412137	1.33066	0.00265402	2.5761	-3.51538	0.385607	1.30641
648	Pnn	0.13243	0.878015	1.59114	0.264784	1.20146	0.00798103	2.09794	3.05746	0.352294	1.27659	0.00265491	2.57595	-3.51523	0.287635	1.22064
7112	Selenof	0.122822	0.910724	1.63516	0.121565	1.08791	0.0283407	1.54759	2.42608	0.207237	1.15448	0.00268107	2.57169	-3.51071	0.206527	1.15391
3111	Plpp1	0.0455561	1.34145	2.18052	0.442373	1.35884	0.025845	1.58762	2.47301	0.541684	1.45567	0.00270718	2.56748	-3.50624	0.511329	1.42536
5706	Dtnbp1	0.040651	1.39093	2.24013	0.442366	1.35883	0.0189129	1.72324	2.63052	0.49953	1.41375	0.00272446	2.56472	-3.5033	0.444514	1.36086
496	Alyref	0.125973	0.899721	1.6204	0.185339	1.13708	0.0199232	1.70064	2.60441	0.249445	1.18875	0.00273603	2.56288	-3.50135	0.231804	1.1743
3487	Taf9b	0.147529	0.831123	1.52717	0.303667	1.23428	0.025241	1.59789	2.48501	0.404501	1.32363	0.00275483	2.5599	-3.49819	0.397293	1.31703
6434	Bcl7a	0.034393	1.46353	2.3268	0.456415	1.37213	0.0993296	1.00292	1.75686	0.273143	1.20844	0.00276327	2.55858	-3.49678	0.37043	1.29274
345	Btbd2	0.141376	0.849626	1.55253	0.160971	1.11804	0.00106354	2.97325	4.04242	0.359751	1.2832	0.00278601	2.55502	-3.493	0.244434	1.18463
5848	Coa7	0.0267506	1.57267	2.4555	0.186905	1.13832	0.0585461	1.2325	2.04745	0.193147	1.14325	0.00280103	2.55268	-3.49052	0.220207	1.1649
805	Rtn2	0.0452471	1.34441	2.18409	0.747689	1.6791	0.0278936	1.5545	2.43419	0.786509	1.7249	0.00287255	2.54173	-3.47889	0.74788	1.67932
2918	Gprasp1	0.177003	0.752019	1.4167	0.248754	1.18818	0.0217244	1.66305	2.56087	0.339094	1.26496	0.00287518	2.54133	-3.47846	0.326341	1.25383
4359	Sowaha	0.225993	0.645905	1.26265	0.223105	1.16724	0.0317686	1.498	2.36764	0.350377	1.27489	0.002903	2.53715	-3.47402	0.375091	1.29692
4842	Amer2	0.117115	0.931388	1.66273	0.32438	1.25213	0.0208801	1.68027	2.58083	0.371495	1.29369	0.00297831	2.52603	-3.4622	0.342027	1.26754
6266	Tmem100	0.0880248	1.05539	1.82471	0.180513	1.13329	0.0200302	1.69832	2.60172	0.219933	1.16468	0.00298614	2.52489	-3.46099	0.198272	1.14732
2579	Alg10b	0.207517	0.682946	1.31727	0.282806	1.21656	0.0763924	1.11695	1.90315	0.33782	1.26385	0.00302439	2.51936	-3.45512	0.456828	1.37252
81	Sh3pxd2b	0.0592294	1.22746	2.04123	0.242873	1.18335	0.0280566	1.55196	2.43122	0.245958	1.18588	0.00310293	2.50823	-3.44328	0.232468	1.17484
4037	Bcas1	0.0898324	1.04657	1.81336	0.599447	1.51514	0.102485	0.989339	1.73913	0.461903	1.37736	0.00310831	2.50748	-3.44248	0.636444	1.55449
5707	Ash2l	0.205078	0.68808	1.32476	0.193322	1.14339	0.0134355	1.87175	2.80089	0.285978	1.21924	0.00312856	2.50466	-3.43948	0.253501	1.1921
108	Fggy	0.0120168	1.92021	2.85612	0.304102	1.23465	0.00884049	2.05352	3.00729	0.35381	1.27793	0.00315476	2.50103	-3.43563	0.279761	1.21399
2100	Renbp	0.0154697	1.81052	2.73088	0.246095	1.18599	0.203508	0.69142	1.32963	0.14222	1.1036	0.00315961	2.50037	-3.43492	0.26599	1.20246
7051	Scyl1	0.174637	0.757864	1.42498	0.201348	1.14977	0.00246067	2.60895	3.63165	0.362806	1.28592	0.00319468	2.49557	-3.42983	0.260935	1.19825
5306	Seh1l	0.099128	1.0038	1.75801	0.330658	1.25759	0.0579357	1.23705	2.05306	0.358629	1.28221	0.00320552	2.4941	-3.42826	0.407637	1.32651
802	Dtnb	0.0762712	1.11764	1.90402	0.230573	1.1733	0.00810809	2.09108	3.04972	0.360412	1.28379	0.00321212	2.49321	-3.42731	0.280472	1.21459
740	Slc6a2	0.0169044	1.772	2.68667	0.282569	1.21636	0.0167193	1.77678	2.69217	0.263903	1.20072	0.00322609	2.49132	-3.42531	0.227292	1.17064
62	Bptf	0.36519	0.437482	0.933814	0.183688	1.13578	0.0222989	1.65172	2.54771	0.342543	1.26799	0.00322994	2.4908	-3.42476	0.360399	1.28378
2559	Foxk2	0.137259	0.86246	1.57003	0.182232	1.13464	0.0168269	1.774	2.68897	0.257447	1.19536	0.00326355	2.48631	-3.41998	0.227345	1.17068
2500	Tmem88b	0.0139185	1.85641	2.78338	0.350862	1.27532	0.0605323	1.21801	2.02954	0.299659	1.23085	0.00330096	2.48136	-3.41471	0.341917	1.26744
7813	Bscl2	0.0918219	1.03705	1.8011	0.179664	1.13262	0.0129666	1.88717	2.81849	0.260396	1.19781	0.00333396	2.47704	-3.41012	0.215973	1.16149
1029	Igsf11	0.0767392	1.11498	1.90066	0.385862	1.30664	0.0570148	1.24401	2.06163	0.346541	1.27151	0.00336791	2.47264	-3.40544	0.384806	1.30568
596	Capn1	0.130069	0.885826	1.60169	0.183909	1.13596	0.0275447	1.55996	2.44061	0.223066	1.16721	0.00337615	2.47158	-3.40431	0.21352	1.15951
5270	D8Ertd738e	0.16763	0.775648	1.45006	1.10868	2.15648	0.0410545	1.38664	2.23498	1.45965	2.75042	0.00340005	2.46851	-3.40105	1.55433	2.93698
3216	Med22	0.028421	1.54636	2.42464	0.511769	1.4258	0.00510586	2.29193	3.27582	0.593745	1.50916	0.00341994	2.46598	-3.39835	0.43075	1.34793
3014	Kpna1	0.0822943	1.08463	1.86211	0.366115	1.28888	0.0435418	1.36109	2.20424	0.433818	1.3508	0.003459	2.46105	-3.39311	0.448136	1.36428
4322	Elp6	0.101262	0.994555	1.74595	0.259902	1.1974	0.224421	0.648936	1.26715	0.181911	1.13439	0.0035208	2.45336	-3.38492	0.369823	1.29219
5785	Lzts2	0.0674325	1.17113	-1.97125	-0.880473	0.543189	0.0204798	1.68867	-2.59057	-1.21336	0.431262	0.00352678	2.45262	3.38414	-1.06514	0.477926
7055	Enpp5	0.108285	0.965431	1.70777	0.224576	1.16843	0.0341824	1.4662	2.32997	0.269947	1.20576	0.00355251	2.44946	-3.38078	0.26547	1.20203
688	Il16	0.152795	0.81589	1.50615	0.144138	1.10507	0.135582	0.867799	1.57729	0.161937	1.11879	0.00362093	2.44118	-3.37196	0.254633	1.19303
6747	S100a16	0.0777276	1.10942	1.89362	0.68955	1.61278	0.0721673	1.14166	1.93431	0.738525	1.66847	0.0036483	2.43791	-3.36848	0.867715	1.82477
3730	Rpl35	0.156954	0.804228	1.48998	0.247202	1.1869	0.0199369	1.70034	2.60407	0.35989	1.28333	0.00374651	2.42637	-3.35619	0.322806	1.25076
799	Srpk1	0.108825	0.963273	1.70493	0.389473	1.30992	0.0226026	1.64584	2.54088	0.506357	1.42046	0.00378815	2.42157	-3.35108	0.454266	1.37009
4974	Ppat	0.0564323	1.24847	2.06712	0.402049	1.32138	0.0583235	1.23416	2.04949	0.314996	1.24401	0.00378927	2.42144	-3.35094	0.343317	1.26867
4879	Scyl2	0.498836	0.302042	0.693105	0.16736	1.123	0.0209806	1.67818	2.57842	0.352421	1.2767	0.00382185	2.41773	-3.34698	0.378778	1.30024
7084	Maged2	0.0518025	1.28565	2.11269	0.818397	1.76345	0.0343087	1.4646	2.32806	0.849285	1.80161	0.00382675	2.41717	-3.34639	0.811848	1.75546
5958	Ophn1	0.285819	0.54391	1.10679	0.215413	1.16104	0.0128487	1.89114	2.82301	0.36754	1.29015	0.00385078	2.41445	-3.34349	0.323921	1.25173
6775	Med8	0.0184799	1.7333	2.64212	0.343986	1.26926	0.0643846	1.19122	1.9963	0.232405	1.17479	0.00385883	2.41354	-3.34253	0.262433	1.1995
4648	Zmat4	0.189656	0.722034	1.3739	0.223979	1.16795	0.071964	1.14288	1.93585	0.242454	1.183	0.00386077	2.41333	-3.34229	0.298688	1.23003
3496	Rbm26	0.340754	0.467559	0.983932	0.152402	1.11142	0.0122698	1.91116	2.84582	0.289356	1.22209	0.00390534	2.40834	-3.33698	0.258982	1.19663
7497	Amfr	0.0774873	1.11077	1.89532	0.263333	1.20025	0.0219716	1.65814	2.55517	0.297354	1.22889	0.00394253	2.40423	-3.3326	0.261024	1.19833
186	Cisd3	0.183801	0.735653	-1.39341	-1.2784	0.412251	0.00104716	2.97999	-4.05006	-3.46425	0.0906062	0.00400955	2.3969	3.32479	-2.28086	0.205776
2599	Agap2	0.188755	0.724101	1.37687	0.20188	1.1502	0.0202148	1.69433	2.59711	0.306533	1.23673	0.00401459	2.39636	-3.32421	0.276321	1.2111
468	Akr1b10	0.0425836	1.37076	2.21588	0.183992	1.13602	0.2137	0.670195	1.29857	0.12182	1.08811	0.0040404	2.39358	-3.32125	0.222483	1.16674
4253	Tbc1d10b	0.176646	0.752896	1.41795	0.246896	1.18665	0.0314151	1.50286	2.37339	0.311951	1.24138	0.00409455	2.38779	-3.31508	0.303352	1.23401
1841	Smg6	0.170525	0.768212	1.43959	0.198796	1.14774	0.048529	1.314	2.14723	0.2178	1.16296	0.00413719	2.3833	-3.31029	0.233351	1.17556
5794	Fyttd1	0.224257	0.649254	1.26763	0.236405	1.17805	0.0627165	1.20262	2.01047	0.314093	1.24323	0.00414734	2.38223	-3.30915	0.371924	1.29408
4042	Rbbp8	0.0374928	1.42605	2.28217	0.266697	1.20305	0.0353026	1.45219	2.31332	0.280243	1.2144	0.00414934	2.38202	-3.30893	0.266661	1.20302
4531	Pggt1b	0.0242719	1.6149	2.50486	0.428795	1.34611	0.0155574	1.80806	2.72806	0.520191	1.43415	0.00425356	2.37125	-3.29744	0.426555	1.34402
828	Capns1	0.332223	0.47857	1.00202	0.185951	1.13757	0.0573702	1.24131	2.05831	0.236155	1.17785	0.00426614	2.36997	-3.29607	0.287944	1.2209
246	Pdzd8	0.234661	0.629558	1.23823	0.221862	1.16624	0.0530916	1.27497	2.09964	0.252818	1.19153	0.00426849	2.36973	-3.29581	0.284976	1.21839
3031	Pak3	0.274762	0.561043	1.13358	0.115456	1.08332	0.00641217	2.19299	3.16459	0.231008	1.17365	0.00426867	2.36971	-3.29579	0.181625	1.13416
3721	Wdr43	0.199048	0.701041	1.34361	0.224727	1.16856	0.0719189	1.14316	1.93619	0.206503	1.15389	0.00427734	2.36883	-3.29486	0.249921	1.18914
722	Snca	0.225027	0.647765	1.26541	0.306436	1.23665	0.0308112	1.51129	2.38334	0.422423	1.34018	0.00431153	2.36537	-3.29117	0.414406	1.33275
3748	Apool	0.231186	0.636039	1.24793	0.137688	1.10014	0.0250148	1.6018	2.48958	0.224418	1.16831	0.004337	2.36281	-3.28844	0.211457	1.15786
5188	Mrtfa	0.227076	0.643829	1.25956	0.134248	1.09752	0.054211	1.26591	2.08854	0.20951	1.1563	0.00434538	2.36197	-3.28754	0.23566	1.17745
5897	Phaf1	0.170181	0.769088	1.44083	0.230104	1.17292	0.0194379	1.71135	2.61679	0.385349	1.30618	0.00437484	2.35904	-3.28441	0.337475	1.26354
1951	Cyth2	0.268132	0.571651	1.15004	0.124383	1.09004	0.0249605	1.60275	2.49068	0.219103	1.16401	0.00437912	2.35861	-3.28396	0.209488	1.15628
6305	Dnajc19	0.0257407	1.58938	2.47506	0.376004	1.29774	0.0838589	1.07645	1.85167	0.257153	1.19512	0.00439661	2.35688	-3.28211	0.306952	1.23709
6508	Cep97	0.134547	0.871127	1.58181	0.152436	1.11144	0.0119661	1.92205	2.85821	0.248697	1.18813	0.00445278	2.35137	-3.27623	0.198969	1.14788
920	Mt-Cyb	0.108498	0.96458	1.70665	0.319154	1.2476	0.00280041	2.55278	3.56858	0.581089	1.49598	0.00448021	2.3487	-3.27338	0.393915	1.31395
5944	Med1	0.30111	0.521275	1.07098	0.153561	1.11231	0.0419871	1.37688	2.22326	0.39808	1.31775	0.00449093	2.34766	-3.27227	0.431767	1.34888
2023	Fv1	0.0219647	1.65827	2.55533	1.06758	2.09591	0.0192726	1.71506	2.62107	1.02481	2.03469	0.00451192	2.34564	-3.27011	0.865784	1.82233
3376	Radil	0.433487	0.363024	0.804836	0.202992	1.15108	0.0511543	1.29112	2.11936	0.343561	1.26888	0.00457106	2.33998	-3.26407	0.421875	1.33967
4897	Rpgrip1l	0.0422154	1.37453	2.22042	0.747151	1.67847	0.096384	1.01599	1.77385	0.555302	1.46948	0.00457865	2.33926	-3.2633	0.686555	1.60944
3536	Ubxn7	0.0282584	1.54885	2.42757	0.209496	1.15628	0.00406063	2.39141	3.3875	0.278481	1.21292	0.00458028	2.33911	-3.26314	0.191255	1.14176
2139	Evi5	0.347179	0.459446	0.970517	0.135919	1.09879	0.148246	0.829016	1.52427	0.138625	1.10086	0.00464465	2.33305	-3.25666	0.246628	1.18643
419	Dlg5	0.156065	0.806695	1.49341	0.174574	1.12863	0.0282653	1.54875	2.42744	0.236026	1.17774	0.00467735	2.33	-3.25341	0.217636	1.16283
4823	Wdr37	0.285604	0.544235	1.1073	0.163192	1.11976	0.00942716	2.02562	2.97573	0.265869	1.20236	0.00469224	2.32862	-3.25194	0.216494	1.16191
2847	Trim41	0.686919	0.163095	0.410952	0.0515452	1.03637	0.0296114	1.52854	2.40368	0.199413	1.14823	0.00471013	2.32697	-3.25017	0.24384	1.18414
854	Emp2	0.0807695	1.09275	1.87245	0.651924	1.57126	0.12267	0.911263	1.63588	0.499068	1.4133	0.00484256	2.31493	-3.2373	0.674456	1.59599
14	Adrm1b	0.0404581	1.39299	2.24261	0.122246	1.08843	0.0159394	1.79753	2.71598	0.165403	1.12148	0.00489596	2.31016	-3.23221	0.133208	1.09673
698	Wsb2	0.245243	0.610403	1.20936	0.226688	1.17015	0.00700804	2.1544	3.12113	0.434541	1.35148	0.00494748	2.30562	-3.22735	0.333176	1.25978
6548	Emc4	0.306534	0.513522	1.0586	0.190863	1.14145	0.0371177	1.43042	2.28739	0.365026	1.2879	0.00495377	2.30506	-3.22676	0.376934	1.29858
6876	Znf593	0.0579216	1.23716	2.05319	0.243463	1.18383	0.0195077	1.70979	2.61499	0.268883	1.20487	0.00504261	2.29734	-3.21851	0.22285	1.16704
6970	Pak1ip1	0.0727794	1.13799	1.92969	0.292621	1.22486	0.0243632	1.61327	2.50296	0.332254	1.25898	0.00507916	2.29421	-3.21515	0.2865	1.21968
4750	Unc119b	0.0690982	1.16053	1.958	0.325194	1.25283	0.162522	0.789087	1.46889	0.241207	1.18198	0.00508209	2.29396	-3.21489	0.364977	1.28786
2558	Mif4gd	0.0210992	1.67573	2.57558	0.294241	1.22624	0.0076143	2.11837	3.08051	0.355576	1.2795	0.0051109	2.2915	-3.21226	0.259338	1.19693
7417	Ddx25	0.0552049	1.25802	2.07886	0.556663	1.47086	0.0247227	1.6069	2.49554	0.677158	1.59899	0.00514269	2.28881	-3.20938	0.583132	1.4981
842	Men1	0.0464967	1.33258	2.16977	0.407252	1.32616	0.181786	0.740439	1.40024	0.235478	1.1773	0.00516868	2.28662	-3.20704	0.374133	1.29606
5477	Adpgk	0.135619	0.867678	1.57712	0.176541	1.13017	0.0145946	1.83581	2.75983	0.227623	1.1709	0.00523021	2.28148	-3.20154	0.183033	1.13527
3513	Bckdhb	0.0948947	1.02276	1.78262	0.230201	1.173	0.0728442	1.13761	1.92921	0.236851	1.17842	0.0052551	2.27942	-3.19933	0.26372	1.20057
4657	Gpr22	0.0189397	1.72263	2.62981	0.960056	1.94539	0.0127274	1.89526	2.82771	1.06591	2.09349	0.00526938	2.27824	-3.19807	0.831277	1.77926
1425	Cdh4	0.493126	0.307042	0.7025	0.0918781	1.06576	0.00598116	2.22321	3.19858	0.232417	1.1748	0.00527614	2.27768	-3.19747	0.189483	1.14035
6304	Map1lc3b	0.0812442	1.09021	1.86921	0.210151	1.15681	0.0260719	1.58383	2.46857	0.225297	1.16902	0.00532971	2.2733	-3.19278	0.195701	1.14528
2864	Crppa	0.134286	0.871968	1.58294	0.271612	1.20716	0.0558347	1.2531	2.07281	0.294183	1.22619	0.00537718	2.26945	-3.18866	0.306761	1.23693
7010	Rab13	0.0722336	1.14126	1.93381	0.214087	1.15997	0.0728155	1.13778	1.92942	0.181416	1.134	0.00541952	2.26604	-3.18501	0.199791	1.14853
347	Fam98c	0.0695481	1.15772	1.95447	0.261941	1.19909	0.0125813	1.90027	2.83342	0.332428	1.25913	0.00553227	2.2571	-3.17543	0.255129	1.19344
2433	Hp1bp3	0.339531	0.46912	0.986506	0.367167	1.28982	0.0513946	1.28908	2.11688	0.483501	1.39813	0.00557298	2.25391	-3.17202	0.535893	1.44984
3206	Snrpa	0.147463	0.831318	1.52743	0.135895	1.09877	0.0194927	1.71013	2.61538	0.230753	1.17345	0.00557666	2.25363	-3.17172	0.19294	1.14309
2978	Grb10	0.118775	0.925275	1.65459	0.301866	1.23274	0.0770229	1.11338	1.89863	0.294444	1.22641	0.00558481	2.25299	-3.17104	0.332575	1.25926
1367	Kras	0.447324	0.349378	0.780352	0.113473	1.08183	0.0487096	1.31239	2.14527	0.183742	1.13583	0.00560622	2.25133	-3.16926	0.211442	1.15784
4838	Vps53	0.188737	0.724144	1.37693	0.184581	1.13649	0.0457705	1.33941	2.17805	0.209867	1.15658	0.00565353	2.24768	-3.16534	0.21061	1.15718
7216	Diablo	0.00233172	2.63232	3.65791	0.310375	1.24003	0.0113767	1.94398	2.88315	0.239552	1.18063	0.00565961	2.24721	-3.16484	0.196327	1.14578
7629	Clcnka	0.128539	0.890965	1.60862	0.214542	1.16034	0.108016	0.966512	1.7092	0.184647	1.13654	0.00566324	2.24693	-3.16455	0.234498	1.1765
1631	Efnb1	0.523369	0.281192	0.653431	0.0913755	1.06539	0.0137129	1.86287	2.79076	0.281165	1.21518	0.00569178	2.24475	-3.16221	0.255663	1.19388
7201	Sphk2	0.15692	0.804321	1.49011	0.138022	1.1004	0.00200846	2.69714	3.73077	0.266855	1.20318	0.00569496	2.24451	-3.16195	0.173593	1.12786
7435	Plekhb1	0.0210737	1.67626	2.57619	0.402506	1.3218	0.0632582	1.19888	2.00583	0.283529	1.21717	0.00570212	2.24396	-3.16136	0.301311	1.23226
5820	Sncb	0.193998	0.712202	1.35975	0.165023	1.12118	0.0400529	1.39737	2.24785	0.215302	1.16095	0.00576752	2.23901	-3.15605	0.209082	1.15595
5929	Letmd1	0.30273	0.518945	1.06726	0.122393	1.08854	0.0653494	1.18476	1.98826	0.190681	1.1413	0.00580724	2.23603	-3.15286	0.220248	1.16493
4390	Mical2	0.292545	0.533807	1.09087	0.133266	1.09677	0.0461202	1.33611	2.17405	0.218397	1.16344	0.00587576	2.23094	-3.1474	0.227576	1.17087
1472	H1-1	0.440722	0.355836	0.791974	0.21775	1.16292	0.0726225	1.13893	1.93087	0.328183	1.25543	0.00590936	2.22846	-3.14474	0.419003	1.337
6803	Phf10	0.172368	0.763543	1.43301	0.328292	1.25553	0.0204715	1.68885	2.59077	0.479704	1.39446	0.00591228	2.22825	-3.14451	0.403986	1.32316
2573	Gpatch11	0.217992	0.66156	1.28585	0.27791	1.21244	0.0329321	1.48238	2.34916	0.417587	1.33569	0.0059152	2.22803	-3.14428	0.390458	1.31081
3092	Arnt2	0.321034	0.493449	1.02626	0.113366	1.08175	0.0208843	1.68018	2.58073	0.215123	1.1608	0.00592832	2.22707	-3.14325	0.191835	1.14222
6256	Ergic3	0.00814655	2.08903	3.0474	0.317876	1.24649	0.0133713	1.87383	2.80327	0.26444	1.20117	0.00594924	2.22554	-3.14161	0.209956	1.15665
5329	Brd8	0.203109	0.692271	1.33087	0.273026	1.20834	0.037195	1.42952	2.28631	0.406347	1.32533	0.00595499	2.22512	-3.14116	0.387252	1.3079
3356	Rapgefl1	0.172912	0.762175	1.43108	0.248635	1.18808	0.0131203	1.88206	2.81266	0.374621	1.2965	0.00597116	2.22394	-3.13989	0.294387	1.22636
595	Kpna6	0.0986624	1.00585	1.76067	0.355358	1.2793	0.0518187	1.28551	2.11252	0.413994	1.33237	0.00598149	2.22319	-3.13909	0.411274	1.32986
6278	Mrpl20	0.101683	0.99275	1.74359	0.484963	1.39955	0.0771523	1.11265	1.89771	0.532428	1.44636	0.00601624	2.22067	-3.13639	0.59052	1.50579
3175	Kcna6	0.0878599	1.05621	1.82575	0.284286	1.21781	0.0102237	1.99039	2.93582	0.386406	1.30713	0.00605206	2.2181	-3.13362	0.286171	1.2194
4177	Gskip	0.0123415	1.90863	2.84294	0.811311	1.75481	0.320981	0.493521	1.02638	0.297986	1.22943	0.0060743	2.2165	-3.13191	0.679716	1.60182
372	Nup153	0.250744	0.60077	1.19473	0.187379	1.13869	0.0211811	1.67405	2.57363	0.285254	1.21863	0.00609723	2.21487	-3.13016	0.247068	1.18679
4694	Wdr59	0.371806	0.429684	0.920645	0.08708	1.06222	0.0274453	1.56153	2.44245	0.167368	1.12301	0.00613651	2.21208	-3.12717	0.15913	1.11661
1809	Megf8	0.0759792	1.11931	1.90612	0.487553	1.40206	0.0108638	1.96402	2.9059	0.720326	1.64755	0.00614305	2.21162	-3.12667	0.535306	1.44925
413	Spryd3	0.301113	0.52127	1.07097	0.279223	1.21354	0.120397	0.919384	1.64673	0.332115	1.25886	0.00626035	2.2034	-3.11785	0.46844	1.38361
7617	Atrn	0.297232	0.526904	1.07993	0.088724	1.06343	0.00271984	2.56546	3.58282	0.223779	1.16779	0.00627005	2.20273	-3.11713	0.153434	1.11221
1522	Rpl29	0.238738	0.622079	1.22699	0.16105	1.1181	0.376704	0.424	0.910998	0.0740581	1.05267	0.00633197	2.19846	-3.11255	0.218324	1.16338
1555	Camlg	0.23228	0.633988	1.24486	0.122319	1.08848	0.0247343	1.6067	2.4953	0.227143	1.17051	0.00633465	2.19828	-3.11235	0.199498	1.1483
6472	Chtop	0.378457	0.421983	0.907567	0.158175	1.11587	0.0517058	1.28646	2.11368	0.288925	1.22173	0.00634389	2.19764	-3.11167	0.316644	1.24543
5138	Ccm2	0.140499	0.852327	1.55622	0.277771	1.21232	0.0132633	1.87735	2.80728	0.419088	1.33708	0.00635626	2.1968	-3.11076	0.323499	1.25136
4189	Nars2	0.0969668	1.01338	1.77045	0.238439	1.17972	0.00354025	2.45097	3.45433	0.383937	1.3049	0.00636283	2.19635	-3.11028	0.253125	1.19179
5093	Adgrg1	0.276512	0.558286	1.12929	0.132466	1.09617	0.0199826	1.69935	2.60292	0.240641	1.18152	0.00646586	2.18937	-3.10278	0.206113	1.15358
2966	Map3k12	0.140092	0.853587	1.55794	0.278029	1.21254	0.0315206	1.50141	2.37167	0.418891	1.3369	0.00647499	2.18876	-3.10213	0.372147	1.29428
6552	Mpc2	0.0655393	1.1835	1.98669	0.378391	1.29989	0.0218932	1.65969	2.55697	0.414376	1.33272	0.00651841	2.18586	-3.09901	0.338552	1.26449
7161	Asah2	0.0530075	1.27566	2.10048	0.273368	1.20863	0.286521	0.542844	1.10512	0.140331	1.10216	0.00656288	2.18291	-3.09583	0.282143	1.216
6196	Fdx2	0.120481	0.919083	1.64633	0.549934	1.46402	0.0323581	1.49002	2.3582	0.697939	1.62219	0.00660232	2.1803	-3.09304	0.617928	1.53467
5378	Ppp1r14c	0.0130743	1.88358	2.81439	0.548898	1.46297	0.0155462	1.80838	2.72842	0.504113	1.41825	0.00661037	2.17977	-3.09247	0.398689	1.31831
2712	Custos	0.0739098	1.1313	1.92126	0.232498	1.17487	0.00282727	2.54863	3.56393	0.349256	1.2739	0.00661934	2.17919	-3.09183	0.223572	1.16762
7243	Rpl38	0.0467334	1.33037	2.1671	0.28889	1.2217	0.0594117	1.22613	2.03958	0.209913	1.15662	0.00662204	2.17901	-3.09164	0.211592	1.15796
6605	Ints12	0.0887598	1.05178	1.82007	0.275185	1.21015	0.0301735	1.52037	2.39405	0.292833	1.22504	0.00662593	2.17875	-3.09137	0.253744	1.1923
6938	Cbx6	0.146633	0.833769	1.5308	0.290012	1.22265	0.295421	0.529559	1.08414	0.253965	1.19248	0.00663604	2.17809	-3.09066	0.544691	1.45871
872	Rpp30	0.259757	0.585433	1.17128	0.135089	1.09816	0.0147849	1.83018	2.75339	0.27529	1.21024	0.00665933	2.17657	-3.08902	0.22247	1.16673
7814	Bnip3l	0.16272	0.788558	1.46815	0.182447	1.13481	0.006253	2.20391	3.17687	0.293666	1.22575	0.00666645	2.17611	-3.08852	0.206899	1.1542
1607	Nap1l2	0.104497	0.980897	1.72809	1.17371	2.25591	0.0459713	1.33751	2.17575	1.26244	2.39901	0.00669063	2.17453	-3.08683	1.19835	2.29477
2557	Tmem109	0.0892755	1.04927	1.81683	0.360967	1.28429	0.0210045	1.67769	2.57784	0.455145	1.37092	0.00685018	2.1643	-3.07582	0.36793	1.2905
2578	Wdr19	0.0330044	1.48143	2.34803	0.599976	1.51569	0.0430104	1.36643	2.21067	0.526176	1.44011	0.00686199	2.16355	-3.07502	0.489943	1.40439
422	Btaf1	0.245841	0.609346	1.20775	0.198913	1.14783	0.071841	1.14363	1.93678	0.253142	1.1918	0.00686816	2.16316	-3.0746	0.282489	1.21629
6687	Atp5f1d	0.142035	0.847603	1.54977	0.339862	1.26564	0.149707	0.824757	1.5184	0.294601	1.22655	0.00688855	2.16187	-3.07321	0.413748	1.33214
3598	Fbxo42	0.0540308	1.26736	2.09031	0.234523	1.17652	0.00711185	2.14802	3.11393	0.311296	1.24082	0.00689032	2.16176	-3.07309	0.216074	1.16157
4938	Phc3	0.133737	0.87375	1.58536	0.319259	1.24769	0.0632127	1.1992	2.00622	0.366362	1.2891	0.00691474	2.16022	-3.07144	0.37781	1.29937
2014	Kifap3	0.310231	0.508315	1.05025	0.114501	1.0826	0.0146963	1.83279	2.75638	0.221994	1.16634	0.00701222	2.15414	-3.0649	0.180643	1.13339
7377	Cyth1	0.1266	0.897566	1.61751	0.134818	1.09795	0.206329	0.685439	1.32091	0.119042	1.08601	0.0070398	2.15244	-3.06306	0.194937	1.14467
2755	Klhdc2	0.294794	0.530482	1.0856	0.159296	1.11674	0.00801168	2.09628	3.05558	0.3371	1.26321	0.00706156	2.1511	-3.06162	0.251791	1.19068
3069	Pafah1b2	0.203491	0.691454	1.32968	0.166577	1.12239	0.0564108	1.24864	2.06732	0.184893	1.13673	0.00710487	2.14844	-3.05876	0.188364	1.13947
7622	Ccs	0.0945162	1.02449	1.78487	0.322177	1.25022	0.0526534	1.27857	2.10404	0.36848	1.29099	0.00714102	2.14624	-3.05639	0.35688	1.28065
6953	Gnai3	0.0827711	1.08212	1.85891	0.322082	1.25013	0.0281223	1.55095	2.43003	0.378712	1.30018	0.00716416	2.14483	-3.05487	0.319828	1.24818
955	Araf	0.283816	0.546963	1.11159	0.144925	1.10567	0.00158252	2.80065	3.84733	0.382443	1.30355	0.00716477	2.1448	-3.05484	0.245797	1.18575
6081	Fuca1	0.0711992	1.14752	1.94168	0.290553	1.22311	0.210713	0.676309	1.30755	0.165432	1.1215	0.00716643	2.1447	-3.05473	0.268139	1.20425
6372	Ecd	0.194826	0.710354	1.35708	0.160341	1.11755	0.00505698	2.29611	3.28051	0.365057	1.28793	0.00718557	2.14354	-3.05348	0.251328	1.1903
6571	Stx17	0.700719	0.154456	0.391796	0.0944206	1.06764	0.0481257	1.31762	2.15163	0.216952	1.16228	0.00719704	2.14285	-3.05273	0.262934	1.19992
7716	Cdh20	0.143751	0.84239	1.54263	0.232124	1.17456	0.0311791	1.50614	2.37726	0.350307	1.27483	0.0072574	2.13922	-3.04883	0.305213	1.2356
5227	Bfar	0.0393982	1.40452	2.25643	0.421387	1.33921	0.0583005	1.23433	2.0497	0.355418	1.27936	0.00726772	2.1386	-3.04816	0.352448	1.27672
2800	Prag1	0.966207	0.0149298	-0.0430787	0.0246316	1.01722	0.0217352	1.66284	2.56062	0.149087	1.10887	0.00727549	2.13814	-3.04766	0.176217	1.12992
6619	Slc37a4	0.0700162	1.1548	1.95081	0.334418	1.26087	0.0141902	1.84801	2.77379	0.431697	1.34882	0.00727747	2.13802	-3.04753	0.325022	1.25268
5472	Fbxo21	0.154448	0.811218	1.49968	0.247607	1.18724	0.0117278	1.93079	2.86815	0.427286	1.3447	0.00729283	2.1371	-3.04655	0.31912	1.24757
1338	Nedd8	0.596854	0.224132	0.540401	0.0768758	1.05473	0.023282	1.63298	2.52592	0.233897	1.17601	0.00733841	2.1344	-3.04363	0.226372	1.16989
3133	Znf148	0.227689	0.642657	1.25781	0.235663	1.17745	0.0407699	1.38966	2.23861	0.315152	1.24414	0.00739608	2.131	-3.03997	0.297106	1.22868
4966	Slc35b4	0.0840467	1.07548	1.85043	0.292535	1.22479	0.0662934	1.17853	1.98049	0.290514	1.22308	0.00740764	2.13032	-3.03924	0.296591	1.22824
1035	Derpc	0.0606756	1.21699	2.02827	0.233755	1.17589	0.0290978	1.53614	2.41262	0.223585	1.16763	0.00740854	2.13027	-3.03918	0.188824	1.13983
2269	Aplp1	0.167271	0.776579	1.45136	0.152663	1.11162	0.0247476	1.60647	2.49502	0.237282	1.17877	0.00743741	2.12858	-3.03736	0.19861	1.14759
7098	Mapk8ip2	0.173375	0.761013	1.42943	0.163786	1.12022	0.011162	1.95226	2.89255	0.285069	1.21847	0.00745281	2.12768	-3.03639	0.211964	1.15826
3378	Znf512	0.080784	1.09267	1.87235	0.301421	1.23236	0.00452649	2.34424	3.33456	0.453376	1.36924	0.00746058	2.12723	-3.0359	0.298441	1.22981
4010	Slc66a2	0.217692	0.662157	1.28673	0.230253	1.17304	0.0711607	1.14776	1.94198	0.30211	1.23295	0.00747774	2.12623	-3.03483	0.326677	1.25412
3791	Akap7	0.144493	0.840153	1.53957	0.316041	1.24491	0.0524624	1.28015	2.10597	0.36232	1.28549	0.00751962	2.1238	-3.03221	0.351864	1.27621
1190	Mpv17	0.0777465	1.10932	1.89349	0.307813	1.23783	0.178083	0.749378	1.41295	0.199981	1.14868	0.00752967	2.12322	-3.03159	0.293665	1.22575
5036	Ipo13	0.214387	0.668802	1.29652	0.177402	1.13085	0.0484049	1.31511	2.14858	0.255698	1.19391	0.00753638	2.12284	-3.03117	0.24883	1.18824
5617	Pqbp1	0.0295984	1.52873	2.4039	0.375008	1.29685	0.00862854	2.06406	3.0192	0.446508	1.36274	0.00755786	2.1216	-3.02984	0.314639	1.2437
5942	Cybrd1	0.0920884	1.03579	1.79947	0.24056	1.18145	0.0965519	1.01524	1.77287	0.214629	1.16041	0.00759696	2.11936	-3.02742	0.245129	1.1852
2822	Rassf5	0.12011	0.920422	1.64812	0.250567	1.18967	0.0867016	1.06197	1.83315	0.233792	1.17592	0.00763009	2.11747	-3.02538	0.259149	1.19677
3704	Kdm3b	0.38952	0.40947	0.886155	0.114397	1.08252	0.0439802	1.35674	2.19899	0.193454	1.1435	0.00763024	2.11746	-3.02537	0.195788	1.14535
6068	Eif2b2	0.141486	0.849286	1.55207	0.144886	1.10564	0.0254747	1.59389	2.48034	0.205068	1.15274	0.00763922	2.11695	-3.02482	0.170581	1.12551
2332	Ids	0.0430752	1.36577	2.20988	0.389463	1.30991	0.0441817	1.35476	2.19659	0.348165	1.27294	0.00773842	2.11135	-3.01878	0.319464	1.24787
5191	Commd1	0.0560612	1.25134	2.07064	0.248727	1.18816	0.0516611	1.28684	2.11414	0.224752	1.16858	0.00777843	2.10911	-3.01636	0.213257	1.1593
3375	Peak1	0.266312	0.574609	1.15461	0.104982	1.07548	0.201716	0.695259	1.33522	0.109307	1.07871	0.00780864	2.10742	-3.01455	0.184072	1.13609
6186	Mydgf	0.0225397	1.64705	2.54229	0.239108	1.18026	0.01308	1.88339	2.81418	0.2493	1.18863	0.00780894	2.10741	-3.01453	0.185781	1.13743
7282	Mbnl1	0.0874683	1.05815	1.82824	0.226002	1.16959	0.0973723	1.01156	1.7681	0.17528	1.12918	0.00783017	2.10623	-3.01326	0.19955	1.14834
6719	Slc25a27	0.218821	0.65991	1.28341	0.190852	1.14144	0.00723914	2.14031	3.10525	0.396381	1.3162	0.0078839	2.10326	-3.01005	0.281156	1.21517
3758	Dnajc15	0.0621246	1.20674	2.01558	0.511318	1.42535	0.535753	0.271036	0.633807	0.140078	1.10196	0.00789672	2.10255	-3.00929	0.527345	1.44127
4518	Senp7	0.0800898	1.09642	1.87712	0.234818	1.17676	0.0185619	1.73138	2.63991	0.306879	1.23703	0.00797433	2.09831	-3.0047	0.237728	1.17913
3320	Top2b	0.154042	0.812361	1.50127	0.38453	1.30543	0.0470886	1.32708	2.16311	0.409576	1.3283	0.00799097	2.0974	-3.00373	0.384533	1.30544
1692	Rrp1	0.211111	0.675489	1.30635	0.27925	1.21356	0.0258197	1.58805	2.47351	0.379999	1.30134	0.00806616	2.09333	-2.99933	0.320267	1.24856
906	Matn4	0.719727	0.142832	0.365657	0.0809482	1.05771	0.0289718	1.53802	2.41484	0.207729	1.15487	0.00807611	2.0928	-2.99875	0.215876	1.16141
133	Ankrd63	0.516899	0.286594	0.663789	0.0533616	1.03768	0.0534748	1.27185	2.09581	0.235024	1.17693	0.00811557	2.09068	-2.99647	0.259535	1.19709
4252	Scn3b	0.111804	0.951542	1.68945	0.235469	1.17729	0.0173834	1.75987	2.67272	0.381164	1.30239	0.00813729	2.08952	-2.99521	0.292993	1.22518
7365	Pin1	0.257488	0.589243	1.17712	0.21387	1.15979	0.0430452	1.36608	2.21024	0.336018	1.26227	0.0081404	2.08935	-2.99503	0.318093	1.24668
334	Armcx4	0.233875	0.631015	1.24041	0.174962	1.12893	0.0932614	1.0303	1.79237	0.207724	1.15486	0.00814859	2.08892	-2.99456	0.241809	1.18247
5673	Psme3ip1	0.129609	0.887363	1.60377	0.294999	1.22688	0.00483282	2.3158	3.30263	0.543414	1.45742	0.00817216	2.08766	-2.99321	0.359453	1.28294
3972	Thnsl2	0.13471	0.8706	1.58109	0.247794	1.18739	0.0933152	1.03005	1.79205	0.203877	1.15179	0.00820275	2.08604	-2.99145	0.22931	1.17227
6032	Arrdc1	0.180061	0.744581	1.40614	0.802387	1.74398	0.110943	0.9549	1.69389	0.961612	1.94748	0.00824082	2.08403	-2.98928	1.16492	2.24221
4639	Slc9a9	0.164774	0.783112	1.46053	0.167843	1.12338	0.0327442	1.48487	2.3521	0.243293	1.18369	0.00826844	2.08258	-2.98771	0.210693	1.15724
6881	Btbd17	0.577022	0.238808	0.570143	0.12749	1.09239	0.0379123	1.42122	2.2764	0.28935	1.22209	0.00829047	2.08142	-2.98646	0.298711	1.23004
5789	Atpaf2	0.108932	0.962845	1.70437	0.266792	1.20313	0.218024	0.661495	1.28575	0.182964	1.13521	0.00829213	2.08133	-2.98637	0.296162	1.22787
3074	Mre11	0.0585487	1.23248	2.04742	0.31921	1.24765	0.0431701	1.36482	2.20873	0.327167	1.25455	0.00830041	2.0809	-2.9859	0.294819	1.22673
7811	Mbd2	0.445622	0.351033	0.783336	0.344078	1.26934	0.192479	0.715618	1.36467	0.372191	1.29432	0.00834235	2.07871	-2.98353	0.658327	1.57825
3135	Grik5	0.145784	0.836291	1.53427	0.283127	1.21683	0.119918	0.921115	1.64905	0.33719	1.26329	0.00837794	2.07686	-2.98154	0.414599	1.33293
2723	Garnl3	0.112577	0.94855	1.68549	0.216396	1.16183	0.0835203	1.07821	1.85392	0.217295	1.16255	0.00843483	2.07392	-2.97836	0.233389	1.17559
326	Mctp1	0.288438	0.539947	1.10056	0.109923	1.07917	0.0215279	1.667	2.56545	0.195201	1.14488	0.00843867	2.07373	-2.97814	0.161946	1.1188
2467	Qsox2	0.0692735	1.15943	1.95662	0.454491	1.3703	0.0783675	1.10586	1.88911	0.342203	1.26769	0.00844095	2.07361	-2.97802	0.358505	1.2821
4906	Lsm14b	0.17313	0.761627	1.4303	0.245804	1.18575	0.0140264	1.85305	2.77955	0.34719	1.27208	0.00844668	2.07331	-2.9777	0.261056	1.19836
171	Mipep	0.292262	0.534228	1.09153	0.0862908	1.06164	0.00535332	2.27138	3.25273	0.246476	1.18631	0.00850766	2.07019	-2.97432	0.170857	1.12573
3349	Slc13a5	0.238785	0.621993	1.22686	0.237799	1.17919	0.033352	1.47688	2.34264	0.395712	1.31559	0.00852202	2.06946	-2.97353	0.349608	1.27421
7695	Slc12a7	0.373841	0.427313	0.916626	0.243731	1.18405	0.0796393	1.09887	1.88023	0.362839	1.28595	0.00855715	2.06767	-2.9716	0.418895	1.3369
7851	Sart1	0.226641	0.644662	1.2608	0.246956	1.1867	0.0284915	1.54529	2.42337	0.336012	1.26226	0.00856447	2.0673	-2.97119	0.286665	1.21982
6851	Tmem263	0.377676	0.42288	0.909094	0.630733	1.54835	0.0556293	1.2547	2.07477	1.19199	2.28468	0.00857966	2.06653	-2.97036	1.24069	2.36312
7187	Utp3	0.207504	0.682973	1.31731	0.371858	1.29402	0.0741863	1.12968	1.91922	0.437024	1.35381	0.00857989	2.06652	-2.97035	0.463751	1.37912
53	H1f10	0.359625	0.44415	0.945017	0.713638	1.63993	0.126971	0.896296	1.6158	0.853007	1.80626	0.00858223	2.0664	-2.97022	1.16177	2.23732
1076	Nudt19	0.0843704	1.07381	1.8483	0.548634	1.4627	0.0815772	1.08843	1.86695	0.476227	1.3911	0.00858519	2.06625	-2.97006	0.503988	1.41813
3109	Znf638	0.283171	0.547951	1.11314	0.162926	1.11956	0.0100774	1.99665	2.94292	0.281289	1.21528	0.008724	2.05928	-2.96252	0.207717	1.15486
5103	Gtf3c1	0.107384	0.969062	1.71255	0.233944	1.17605	0.0324182	1.48921	2.35724	0.266009	1.20248	0.00881414	2.05482	-2.95769	0.224621	1.16847
5669	Daglb	0.0865816	1.06257	1.83392	0.434273	1.35123	0.051023	1.29223	2.12073	0.527687	1.44162	0.0088756	2.0518	-2.95442	0.489456	1.40392
100	Ndufaf6	0.129197	0.888749	1.60564	0.215067	1.16076	0.104792	0.979671	1.72648	0.259598	1.19714	0.00889449	2.05088	-2.95342	0.29879	1.23011
2488	Trmt1	0.032003	1.49481	2.36387	0.412093	1.33062	0.02291	1.63997	2.53406	0.38489	1.30576	0.00893381	2.04896	-2.95135	0.30572	1.23604
7535	Tmed2	0.127869	0.893236	1.61168	0.139421	1.10146	0.0419563	1.3772	2.22364	0.179046	1.13214	0.00893612	2.04885	-2.95122	0.159706	1.11706
6704	Efhd1	0.0336954	1.47243	2.33736	0.355166	1.27913	0.0207888	1.68217	2.58304	0.350381	1.2749	0.008974	2.04701	-2.94923	0.273362	1.20862
2837	C2cd4c	0.350555	0.455244	0.963539	0.230995	1.17364	0.0323244	1.49047	2.35873	0.386577	1.30729	0.00905792	2.04297	-2.94486	0.347661	1.2725
6316	Atg12	0.112799	0.947695	1.68436	0.138472	1.10074	0.0114557	1.94098	2.87973	0.209223	1.15607	0.00913759	2.03917	-2.94073	0.14929	1.10902
2518	Crtc2	0.215605	0.666342	1.2929	0.158412	1.11606	0.0510551	1.29196	2.12039	0.216415	1.16184	0.00914607	2.03877	-2.9403	0.205799	1.15333
3350	Sbno1	0.130717	0.883666	1.59878	0.299569	1.23078	0.013991	1.85415	2.7808	0.434332	1.35128	0.00914745	2.0387	-2.94023	0.319314	1.24774
7639	Arl3	0.103637	0.984484	1.73278	0.214109	1.15999	0.0169091	1.77188	2.68653	0.247371	1.18704	0.00915972	2.03812	-2.9396	0.185855	1.13749
3947	Polr2e	0.0418371	1.37844	2.22513	0.148692	1.10856	0.020753	1.68292	2.5839	0.189262	1.14018	0.00916946	2.03766	-2.9391	0.14671	1.10704
2905	Wwc1	0.397626	0.400525	0.870725	0.0973937	1.06984	0.171104	0.76674	1.43752	0.13876	1.10096	0.00919455	2.03647	-2.93781	0.216998	1.16231
458	Arfgef1	0.482351	0.316637	0.720408	0.0978294	1.07016	0.0178986	1.74718	2.65812	0.242453	1.183	0.00921492	2.03551	-2.93677	0.204042	1.15192
3490	Zc3h11a	0.167003	0.777276	1.45234	0.355906	1.27979	0.0379797	1.42045	2.27548	0.495488	1.4098	0.00922376	2.03509	-2.93632	0.434368	1.35132
1721	Exosc10	0.0665608	1.17678	1.97831	0.290965	1.22346	0.0663534	1.17814	1.98	0.243868	1.18416	0.00923521	2.03455	-2.93573	0.240217	1.18117
3564	Dennd5a	0.0602374	1.22013	2.03217	0.185856	1.13749	0.00567031	2.24639	3.22465	0.280963	1.21501	0.00925222	2.03375	-2.93487	0.183498	1.13563
2890	Sco1	0.196708	0.706177	1.35105	0.393869	1.31391	0.0522547	1.28188	2.10808	0.503555	1.4177	0.00926504	2.03315	-2.93421	0.477758	1.39258
3897	Nav3	0.372015	0.42944	0.920231	0.143616	1.10467	0.0290024	1.53757	2.4143	0.310486	1.24013	0.0092741	2.03273	-2.93375	0.273976	1.20914
7474	Slc25a10	0.11497	0.939416	1.67339	0.159792	1.11713	0.0103797	1.98381	2.92836	0.252828	1.19154	0.00927603	2.03264	-2.93366	0.17788	1.13122
1278	Ptma	0.0477897	1.32067	2.15533	0.373494	1.29549	0.0555755	1.25512	2.07529	0.35282	1.27705	0.0092793	2.03248	-2.93349	0.332604	1.25928
4992	Ahctf1	0.0394231	1.40425	2.2561	0.633094	1.55089	0.0250538	1.60113	2.48879	0.582995	1.49796	0.00933206	2.03002	-2.93082	0.46595	1.38123
7025	Parva	0.0844983	1.07315	1.84746	0.412824	1.33129	0.226398	0.645128	1.26149	0.253405	1.19202	0.00935041	2.02917	-2.92989	0.406332	1.32531
5515	Fam114a2	0.640372	0.193568	0.476807	0.108941	1.07844	0.0636619	1.19612	2.0024	0.198603	1.14759	0.00942555	2.02569	-2.92612	0.233213	1.17545
4004	Ric8b	0.196245	0.707202	1.35253	0.149374	1.10909	0.0107211	1.96976	2.91242	0.275497	1.21041	0.0094435	2.02487	-2.92523	0.197709	1.14688
7500	Gyg1	0.0733415	1.13465	1.92549	0.280402	1.21453	0.0987368	1.00552	1.76024	0.261263	1.19853	0.00946945	2.02368	-2.92394	0.288923	1.22173
4375	Shc2	0.205069	0.6881	1.32479	0.363382	1.28644	0.122427	0.912123	1.63703	0.397177	1.31693	0.0094803	2.02318	-2.9234	0.48911	1.40358
5304	Actr8	0.204205	0.689933	1.32747	0.262284	1.19938	0.217005	0.66353	1.28876	0.182526	1.13487	0.00954824	2.02008	-2.92003	0.295237	1.22709
5652	Golga7	0.0109001	1.96257	2.90426	0.268496	1.20455	0.0025345	2.59611	3.61723	0.351433	1.27583	0.00960733	2.0174	-2.91712	0.216404	1.16183
6383	Mindy3	0.138424	0.85879	1.56504	0.228669	1.17175	0.0675878	1.17013	1.97001	0.259782	1.1973	0.00970769	2.01288	-2.91222	0.257309	1.19525
5680	Elp2	0.176316	0.753708	1.4191	0.178838	1.13197	0.0486837	1.31262	2.14555	0.248468	1.18794	0.00971236	2.01268	-2.912	0.228563	1.17167
4686	Agps	0.240698	0.618528	1.22164	0.117239	1.08466	0.110326	0.957323	1.69709	0.139446	1.10148	0.00980125	2.00872	-2.9077	0.165874	1.12185
4180	Bola2	0.125355	0.901859	1.62327	0.207219	1.15446	0.0609573	1.21497	2.02578	0.203098	1.15117	0.00980414	2.00859	-2.90756	0.194842	1.1446
5726	Tmem205	0.00305032	2.51565	3.52692	1.73991	3.34015	0.0166222	1.77931	2.69507	1.42004	2.67594	0.00984758	2.00667	-2.90548	1.15002	2.21917
48	Rapgef1	0.429044	0.367498	0.812802	0.137525	1.10002	0.0930609	1.03123	1.79358	0.190381	1.14107	0.00986302	2.00599	-2.90474	0.228382	1.17152
323	Ankhd1	0.0352631	1.45268	2.3139	0.522961	1.4369	0.0816852	1.08786	1.86622	0.429021	1.34632	0.00987386	2.00551	-2.90422	0.447937	1.36409
3988	Ddrgk1	0.008022	2.09572	3.05495	0.282376	1.2162	0.0314497	1.50238	2.37282	0.204143	1.152	0.00988737	2.00492	-2.90358	0.177645	1.13104
5700	Ascc2	0.231338	0.635754	1.24751	0.203188	1.15124	0.272186	0.565135	1.13994	0.126281	1.09148	0.00993586	2.00279	-2.90127	0.236925	1.17848
2425	Khdc4	0.157215	0.803506	1.48898	0.158574	1.11618	0.0782317	1.10662	1.89006	0.131373	1.09534	0.00994417	2.00243	-2.90087	0.135665	1.0986
628	Mdm4	0.036607	1.43644	2.29456	1.41039	2.65809	0.0231748	1.63498	2.52826	1.5053	2.83883	0.00998157	2.0008	-2.8991	1.1777	2.26216
864	Map7	0.146721	0.833508	1.53044	0.180391	1.13319	0.0174105	1.75919	2.67194	0.250385	1.18952	0.0099945	2.00024	-2.89849	0.18802	1.1392
3797	Sugct	0.0471353	1.32665	2.16259	0.258136	1.19593	0.278	0.555955	1.12566	0.173087	1.12747	0.0100018	1.99992	-2.89814	0.31215	1.24156
2730	Heca	0.187565	0.726847	1.38081	0.247992	1.18755	0.218102	0.661341	1.28553	0.195705	1.14528	0.0100057	1.99975	-2.89796	0.311789	1.24125
5955	Ghdc	0.0567827	1.24578	2.06381	0.28526	1.21863	0.171054	0.766866	1.4377	0.167761	1.12331	0.0100206	1.9991	-2.89726	0.228833	1.17189
6404	Cnot11	0.236577	0.626028	1.23293	0.153543	1.1123	0.0346836	1.45988	2.32246	0.263007	1.19998	0.010022	1.99904	-2.89719	0.227249	1.1706
3703	Smg5	0.194196	0.711759	1.35911	0.20704	1.15432	0.0273948	1.56233	2.44339	0.28256	1.21635	0.0100334	1.99855	-2.89666	0.230832	1.17351
3800	Tspoap1	0.0939567	1.02707	1.7882	0.275161	1.21013	0.0018543	2.73182	3.7698	0.453784	1.36963	0.0100449	1.99805	-2.89611	0.268047	1.20418
3824	Mybbp1a	0.574329	0.240839	0.574222	0.292193	1.2245	0.256351	0.591165	1.18006	0.278024	1.21253	0.0100563	1.99756	-2.89558	0.595683	1.51119
2987	Traf3	0.268457	0.571126	1.14923	0.120836	1.08736	0.0556409	1.25461	2.07466	0.174728	1.12875	0.0100988	1.99573	-2.89359	0.169194	1.12443
1882	Rps11	0.17435	0.758577	1.42599	0.314661	1.24372	0.0754907	1.12211	1.90966	0.293075	1.22525	0.0101443	1.99378	-2.89147	0.299685	1.23088
5249	Sgpl1	0.166219	0.779319	1.45521	0.136353	1.09912	0.0174023	1.75939	2.67218	0.2106	1.15717	0.0101637	1.99295	-2.89057	0.158395	1.11604
5427	Rabepk	0.337677	0.471498	0.99042	0.155906	1.11412	0.0570575	1.24369	2.06123	0.250047	1.18925	0.0101641	1.99293	-2.89055	0.24881	1.18823
2266	Mark3	0.258502	0.587536	1.17451	0.125388	1.0908	0.019748	1.70448	2.60885	0.247701	1.18731	0.0101777	1.99235	-2.88992	0.194318	1.14418
6311	Otub2	0.00452133	2.34473	3.33511	0.249005	1.18839	0.0983095	1.0074	1.76269	0.155902	1.11412	0.0101928	1.9917	-2.88921	0.187281	1.13862
1979	Eif5a	0.11738	0.930406	1.66142	0.463539	1.37892	0.121725	0.914621	1.64037	0.403603	1.32281	0.0102275	1.99023	-2.88761	0.476681	1.39154
2388	Dok6	0.215853	0.665842	1.29217	0.184129	1.13613	0.099412	1.00256	1.75639	0.231744	1.17425	0.0102369	1.98983	-2.88718	0.261069	1.19837
769	Epb41l2	0.633056	0.198558	0.48735	0.0835995	1.05966	0.0252249	1.59817	2.48534	0.20234	1.15056	0.0102469	1.98941	-2.88672	0.185686	1.13736
3196	Sin3b	0.35994	0.44377	0.94438	0.165849	1.12183	0.0247125	1.60708	2.49574	0.345596	1.27068	0.010256	1.98902	-2.8863	0.289206	1.22197
5714	Erlin1	0.165545	0.781084	1.45768	0.175293	1.12919	0.014812	1.82939	2.75248	0.242916	1.18338	0.0102944	1.9874	-2.88453	0.178141	1.13143
1754	Aaas	0.067347	1.17168	1.97194	0.268182	1.20429	0.0278949	1.55447	2.43417	0.273948	1.20911	0.0103027	1.98705	-2.88415	0.219022	1.16394
1868	Timm8b	0.161257	0.792481	1.47363	0.366686	1.28939	0.067716	1.16931	1.96898	0.44363	1.36002	0.0103086	1.9868	-2.88388	0.437201	1.35397
7148	Brd4	0.25493	0.593579	1.18376	0.175305	1.1292	0.0399505	1.39848	2.24918	0.275483	1.2104	0.0103208	1.98629	-2.88332	0.245017	1.18511
4772	Rtkn	0.277112	0.557344	1.12782	0.121386	1.08778	0.017945	1.74606	2.65682	0.254271	1.19273	0.0103592	1.98467	-2.88157	0.196927	1.14625
5963	Derl1	0.0403904	1.39372	2.24348	0.537864	1.45182	0.0332353	1.4784	2.34444	0.532799	1.44673	0.0103599	1.98464	-2.88154	0.442351	1.35882
4469	Rmdn2	0.270683	0.56754	1.14368	0.210666	1.15722	0.150561	0.822287	1.51499	0.169621	1.12476	0.0104221	1.98204	-2.87871	0.228191	1.17137
5937	Lrp8	0.387124	0.41215	0.890758	0.173226	1.12758	0.0285497	1.5444	2.42233	0.353738	1.27787	0.0104457	1.98106	-2.87764	0.305259	1.23564
4443	Gjc2	0.0149545	1.82523	2.74773	0.374897	1.29675	0.00488412	2.31121	3.29748	0.421352	1.33918	0.0104682	1.98013	-2.87662	0.271584	1.20713
6931	Riok3	0.0618336	1.20878	2.0181	0.357803	1.28147	0.212688	0.672256	1.3016	0.218701	1.16369	0.0104998	1.97882	-2.8752	0.33029	1.25727
4887	Wdr24	0.12638	0.898321	1.61852	0.250174	1.18935	0.0151224	1.82038	2.74217	0.355102	1.27908	0.0105894	1.97513	-2.87118	0.257986	1.19581
6545	Elp3	0.147039	0.832567	1.52915	0.175519	1.12937	0.013624	1.8657	2.79399	0.26688	1.2032	0.0106581	1.97232	-2.86812	0.191707	1.14211
2791	Coq8b	0.2736	0.562884	1.13645	0.379522	1.30091	0.170194	0.769055	1.44078	0.347067	1.27197	0.0106739	1.97168	-2.86742	0.492197	1.40659
2385	Specc1l	0.22879	0.640563	1.25469	0.142347	1.1037	0.0509669	1.29271	2.12131	0.163107	1.1197	0.0106875	1.97113	-2.86682	0.151136	1.11044
4465	Cptp	0.0240644	1.61863	2.50921	0.315648	1.24457	0.0434348	1.36216	2.20553	0.29137	1.2238	0.0107299	1.96941	-2.86495	0.257863	1.19571
2470	Ankmy2	0.418789	0.378004	0.831394	0.130975	1.09503	0.0440761	1.3558	2.19785	0.234618	1.17659	0.0107704	1.96777	-2.86317	0.222335	1.16662
485	S1pr1	0.031764	1.49807	2.36772	0.286671	1.21982	0.0595542	1.22509	2.03829	0.232238	1.17466	0.0107858	1.96715	-2.86249	0.219759	1.16454
4073	Slitrk4	0.826927	0.0825327	0.222498	0.0239156	1.01672	0.0748524	1.12579	1.91432	0.193996	1.14393	0.0107933	1.96684	-2.86216	0.250045	1.18924
3426	Nop58	0.105998	0.974702	1.71996	0.219669	1.16447	0.0130051	1.88589	2.81702	0.300481	1.23155	0.010804	1.96642	-2.86169	0.212541	1.15873
1926	Rps28	0.141547	0.8491	1.55181	0.457321	1.37299	0.0553072	1.25722	2.07787	0.510541	1.42458	0.0108528	1.96446	-2.85956	0.471106	1.38617
2028	Myo1f	0.056121	1.25087	2.07007	0.21201	1.1583	0.130992	0.882755	1.59755	0.154051	1.11269	0.0108569	1.96429	-2.85938	0.184734	1.13661
67	Osbpl7	0.137093	0.862984	1.57074	0.206496	1.15388	0.0391009	1.40781	2.26037	0.272911	1.20824	0.0108854	1.96316	-2.85814	0.232579	1.17493
1323	Rxrb	0.219246	0.659068	1.28217	0.14998	1.10955	0.0946556	1.02385	1.78404	0.171963	1.12659	0.0109219	1.9617	-2.85656	0.188209	1.13935
4927	Nav1	0.35232	0.453063	0.959909	0.105485	1.07586	0.0198091	1.70313	2.6073	0.206549	1.15392	0.010936	1.96114	-2.85595	0.164191	1.12054
3682	Ubr2	0.264101	0.57823	1.1602	0.16185	1.11872	0.0589098	1.22981	2.04413	0.238063	1.17941	0.0109365	1.96112	-2.85592	0.229901	1.17275
4466	Ift56	0.106175	0.973977	1.71901	0.25341	1.19202	0.0425761	1.37083	2.21598	0.272088	1.20755	0.0109484	1.96065	-2.85541	0.234758	1.17671
5091	Kct2	0.210042	0.677694	1.30958	0.21826	1.16333	0.10098	0.995765	1.74753	0.244246	1.18447	0.0110077	1.9583	-2.85285	0.272025	1.2075
5172	Irf2bpl	0.287615	0.541189	1.10251	0.133804	1.09718	0.0238527	1.62246	2.51368	0.200005	1.1487	0.0110432	1.95691	-2.85133	0.160722	1.11785
5369	Purg	0.339399	0.46929	0.986786	0.175378	1.12926	0.0548287	1.26099	2.0825	0.281743	1.21566	0.0111047	1.95449	-2.8487	0.272484	1.20789
5862	Gps2	0.0202249	1.69411	2.59686	0.308058	1.23804	0.00312454	2.50521	3.5152	0.38379	1.30477	0.0111537	1.95258	-2.84661	0.233716	1.17586
5797	Srgap2	0.319283	0.495824	1.03011	0.0642454	1.04554	0.0119818	1.92148	2.85756	0.152023	1.11113	0.0111705	1.95193	-2.8459	0.111044	1.08001
2909	Tmem199	0.246752	0.60774	1.20532	0.22156	1.16599	0.0753825	1.12273	1.91045	0.283185	1.21688	0.0111906	1.95114	-2.84505	0.289711	1.2224
5900	Prpf3	0.260645	0.583951	1.169	0.198036	1.14714	0.00913428	2.03933	2.99124	0.307351	1.23743	0.0113468	1.94513	-2.83848	0.21346	1.15947
3453	Arhgap20	0.474031	0.324193	0.734399	0.102682	1.07377	0.250376	0.601407	1.1957	0.158581	1.11619	0.0113778	1.94394	-2.83719	0.301448	1.23238
5928	Mta3	0.273571	0.56293	1.13652	0.146992	1.10726	0.234709	0.62947	1.23809	0.129347	1.0938	0.0113966	1.94322	-2.83641	0.215341	1.16098
1629	Fgd1	0.140169	0.853348	1.55762	0.274097	1.20924	0.0825105	1.08349	1.86066	0.299892	1.23105	0.0114057	1.94288	-2.83603	0.305651	1.23598
415	Rabl2	0.326973	0.485488	1.01332	0.106891	1.07691	0.077987	1.10798	1.89179	0.20521	1.15285	0.0114142	1.94255	-2.83568	0.216436	1.16186
3808	Arhgef4	0.218642	0.660267	1.28394	0.0923413	1.0661	0.0447446	1.34926	2.18996	0.140457	1.10225	0.0114469	1.94131	-2.83432	0.12438	1.09004
2740	Carmil2	0.0460219	1.33704	2.17517	0.357501	1.2812	0.0137486	1.86174	2.78947	0.360615	1.28397	0.0114748	1.94026	-2.83317	0.254701	1.19309
254	Arxes1	0.0539027	1.26839	2.09157	0.245776	1.18573	0.0134838	1.87019	2.79912	0.307258	1.23735	0.0114835	1.93993	-2.83281	0.216094	1.16158
5390	Smyd2	0.508383	0.293809	0.677536	0.131288	1.09527	0.0869463	1.06075	1.83158	0.276745	1.21146	0.0114947	1.9395	-2.83235	0.321315	1.24947
7729	Xpr1	0.0523195	1.28134	2.10742	0.926029	1.90004	0.0487778	1.31178	2.14453	0.946689	1.92744	0.0115405	1.93778	-2.83046	0.836289	1.78545
2336	B4galnt1	0.225966	0.645957	1.26272	0.152673	1.11163	0.052431	1.28041	2.10629	0.205189	1.15284	0.0116506	1.93365	-2.82596	0.188185	1.13933
5287	Spart	0.248166	0.605258	1.20155	0.274882	1.20989	0.0553047	1.25724	2.07789	0.358017	1.28166	0.0116531	1.93356	-2.82586	0.334567	1.261
4467	Gpr89	0.0586965	1.23139	2.04607	0.182996	1.13524	0.0183635	1.73604	2.64529	0.22675	1.1702	0.0116719	1.93286	-2.82509	0.166263	1.12215
2081	Siae	0.165303	0.781719	1.45857	0.186774	1.13822	0.0054845	2.26086	3.24091	0.36327	1.28634	0.0117533	1.92984	-2.8218	0.23274	1.17506
4709	Cpne1	0.406487	0.390953	0.854093	0.162842	1.11949	0.082815	1.08189	1.85862	0.183742	1.13583	0.0117553	1.92977	-2.82172	0.201307	1.14974
703	Prkag1	0.213645	0.670307	1.29874	0.157245	1.11516	0.0313093	1.50433	2.37512	0.26679	1.20313	0.0117717	1.92916	-2.82105	0.218312	1.16337
1262	M6pr	0.298996	0.524335	1.07585	0.201834	1.15016	0.0197937	1.70347	2.60769	0.361992	1.2852	0.0117728	1.92912	-2.82101	0.279797	1.21402
418	Cdh18	0.5484	0.260903	0.614024	0.221615	1.16604	0.0576769	1.239	2.05546	0.463597	1.37898	0.0117891	1.92852	-2.82035	0.480304	1.39504
4029	Ddhd1	0.0922853	1.03487	1.79828	0.194674	1.14447	0.0363833	1.4391	2.29773	0.216778	1.16214	0.0118453	1.92645	-2.8181	0.178579	1.13177
4742	Ccdc90b	0.161594	0.791575	1.47236	0.293327	1.22546	0.0909968	1.04097	1.80615	0.293771	1.22584	0.0118696	1.92556	-2.81712	0.307652	1.23769
2865	Cdh12	0.196308	0.707063	1.35233	0.198366	1.1474	0.0602079	1.22035	2.03243	0.280351	1.21449	0.0119234	1.9236	-2.81498	0.262945	1.19993
6246	Ntpcr	0.0696886	1.15684	1.95337	0.332466	1.25916	0.103317	0.985828	1.73454	0.27981	1.21403	0.0119481	1.9227	-2.814	0.302094	1.23293
2649	Hdgfl2	0.211265	0.675171	1.30588	0.23245	1.17483	0.0217009	1.66352	2.56142	0.328318	1.25555	0.0119632	1.92215	-2.81339	0.251302	1.19028
2222	Gabpa	0.359975	0.443727	0.944308	0.140714	1.10245	0.0152246	1.81745	2.73882	0.269798	1.20564	0.0119806	1.92152	-2.81271	0.203125	1.15119
2602	Dennd11	0.0711057	1.1481	1.9424	0.230491	1.17323	0.0201303	1.69615	2.59922	0.27373	1.20893	0.0120011	1.92078	-2.81189	0.202603	1.15077
2529	Mast3	0.404873	0.392681	0.857105	0.197177	1.14645	0.0918765	1.0368	1.80077	0.302211	1.23303	0.0120198	1.9201	-2.81115	0.34036	1.26607
4300	Chmp2b	0.200767	0.697307	1.33819	0.130181	1.09443	0.0193635	1.71302	2.61871	0.204426	1.15223	0.012023	1.91999	-2.81103	0.153222	1.11205
3712	Cand2	0.106131	0.974156	1.71924	0.167705	1.12327	0.10466	0.980218	1.72719	0.15475	1.11323	0.012069	1.91833	-2.80922	0.167598	1.12319
6696	Cmip	0.679143	0.168038	0.421814	0.0656337	1.04654	0.0358433	1.44559	2.30547	0.214835	1.16057	0.0120768	1.91805	-2.80891	0.206537	1.15391
4372	Srp68	0.178688	0.747904	1.41086	0.145382	1.10602	0.0155522	1.80821	2.72823	0.217196	1.16247	0.0121155	1.91666	-2.80739	0.156732	1.11476
2279	Eif2ak2	0.155183	0.809155	1.49682	0.25081	1.18987	0.0611677	1.21348	2.02393	0.330204	1.25719	0.0121753	1.91452	-2.80505	0.307022	1.23715
2815	Rnf150	0.212169	0.673318	1.30316	0.186505	1.138	0.0734589	1.13396	1.92461	0.265251	1.20185	0.012226	1.91271	-2.80307	0.262179	1.19929
7351	Myo18a	0.357217	0.447068	0.949902	0.145885	1.10641	0.0219387	1.65879	2.55593	0.247868	1.18745	0.0122808	1.91077	-2.80095	0.196201	1.14568
6238	Timm22	0.122365	0.912344	1.63733	0.321086	1.24927	0.0167625	1.77566	2.69088	0.507511	1.4216	0.0123262	1.90917	-2.7992	0.365422	1.28826
6948	Hmg20a	0.147122	0.832322	1.52881	0.188788	1.13981	0.00544731	2.26382	3.24423	0.344948	1.2701	0.0123564	1.90811	-2.79804	0.218443	1.16348
1709	Cd38	0.158342	0.800403	1.48467	0.250234	1.1894	0.0823631	1.08427	1.86165	0.321842	1.24993	0.0123742	1.90748	-2.79735	0.324093	1.25188
404	Numa1	0.166075	0.779696	1.45574	0.259189	1.19681	0.0319523	1.4955	2.36468	0.298567	1.22992	0.012406	1.90637	-2.79613	0.240548	1.18144
6181	Sike1	0.36009	0.443589	0.944077	0.165476	1.12154	0.343841	0.463643	0.977466	0.137809	1.10023	0.0124217	1.90582	-2.79553	0.308883	1.23875
827	Dhcr7	0.0419506	1.37726	2.22371	0.372467	1.29456	0.0089176	2.04975	3.00303	0.511155	1.42519	0.0124799	1.90379	-2.79331	0.338136	1.26412
2571	Carmil3	0.917071	0.0375971	0.105893	0.0504318	1.03557	0.0898103	1.04667	1.8135	0.250644	1.18974	0.0125124	1.90266	-2.79207	0.34102	1.26665
1528	Rpl36	0.228565	0.640991	1.25533	0.271988	1.20747	0.068442	1.16468	1.96319	0.356863	1.28064	0.012521	1.90236	-2.79174	0.345702	1.27077
3296	Mea1	0.113087	0.946587	1.6829	0.22868	1.17176	0.050045	1.30064	2.13097	0.284697	1.21815	0.0125927	1.89988	-2.78903	0.249087	1.18845
1717	Bace1	0.52241	0.281988	0.654962	0.0872654	1.06235	0.0195897	1.70797	2.61289	0.224059	1.16802	0.0126814	1.89683	-2.78569	0.181088	1.13374
6054	Nmd3	0.106452	0.972845	1.71752	0.158333	1.116	0.362367	0.440851	0.939482	0.0683263	1.0485	0.0127092	1.89588	-2.78465	0.144538	1.10538
4434	Taf15	0.0912959	1.03955	1.80432	0.423367	1.34105	0.0403509	1.39415	2.24399	0.45279	1.36868	0.0127133	1.89574	-2.7845	0.376751	1.29841
5061	Plekho2	0.123375	0.908774	1.63255	0.348351	1.2731	0.0905322	1.0432	1.80902	0.297238	1.22879	0.01272	1.89551	-2.78425	0.30472	1.23518
7344	Vstm2b	0.407164	0.39023	0.852833	0.112514	1.08111	0.0816744	1.08791	1.86629	0.181311	1.13391	0.0127453	1.89465	-2.7833	0.194054	1.14397
7682	Slc25a15	0.05294	1.27622	2.10116	0.284828	1.21827	0.0248297	1.60503	2.49335	0.338105	1.2641	0.0130094	1.88574	-2.77354	0.256587	1.19465
2653	Lyrm9	0.259647	0.585616	1.17156	0.14484	1.10561	0.012936	1.8882	2.81966	0.30361	1.23423	0.0130297	1.88507	-2.7728	0.214954	1.16067
5999	Trabd	0.0119699	1.92191	2.85805	0.494909	1.40923	0.0089181	2.04973	3.003	0.481749	1.39644	0.0130301	1.88505	-2.77278	0.32618	1.25369
3919	Arhgef17	0.169876	0.769868	1.44193	0.210293	1.15692	0.0426245	1.37034	2.21538	0.288509	1.22138	0.0130563	1.88418	-2.77182	0.244257	1.18448
1723	Evc	0.191715	0.717345	1.36716	1.57076	2.97061	0.117395	0.93035	1.66135	1.78728	3.45164	0.0130727	1.88363	-2.77122	2.01671	4.0466
5891	Tmem132a	0.190398	0.720338	1.37147	0.218984	1.16391	0.0425306	1.3713	2.21653	0.309209	1.23903	0.0130806	1.88337	-2.77094	0.26265	1.19968
6594	Snu13	0.159907	0.796132	1.47872	0.164459	1.12075	0.0337167	1.47216	2.33704	0.193056	1.14318	0.013088	1.88313	-2.77067	0.155543	1.11384
3742	Ssh1	0.259513	0.58584	1.1719	0.110669	1.07973	0.0943884	1.02508	1.78563	0.147542	1.10768	0.0130887	1.8831	-2.77064	0.157121	1.11506
3324	Atp2a3	0.122133	0.913168	1.63843	0.256465	1.19455	0.163989	0.785186	1.46343	0.17238	1.12692	0.0131095	1.88241	-2.76989	0.219623	1.16443
5962	Dhrs7b	0.124731	0.904026	1.62618	0.198153	1.14723	0.0256265	1.59131	2.47732	0.24454	1.18471	0.0131168	1.88217	-2.76962	0.186423	1.13794
2780	Ankrd28	0.480452	0.31835	0.723587	0.111637	1.08045	0.0889001	1.0511	1.81919	0.166899	1.12264	0.013135	1.88157	-2.76896	0.186648	1.13812
2038	Hdac2	0.0518772	1.28502	2.11192	0.630206	1.54779	0.0486241	1.31315	2.1462	0.571453	1.48602	0.0131414	1.88136	-2.76873	0.494731	1.40906
7514	Zeb2	0.136184	0.865873	1.57467	0.137572	1.10005	0.0508607	1.29362	2.12241	0.178995	1.1321	0.0131432	1.8813	-2.76866	0.156516	1.11459
6625	Get4	0.27167	0.565958	1.14122	0.132795	1.09642	0.0331098	1.48004	2.34639	0.235311	1.17716	0.0131819	1.88002	-2.76726	0.193346	1.14341
7321	Trpc4ap	0.269289	0.569781	1.14715	0.199626	1.1484	0.116067	0.935291	1.66792	0.264662	1.20135	0.0132725	1.87705	-2.764	0.302645	1.2334
5973	Psip1	0.0890254	1.05049	1.8184	0.301907	1.23277	0.0230779	1.6368	2.53038	0.360913	1.28424	0.0133359	1.87498	-2.76173	0.268847	1.20484
6338	Atp6v1g1	0.159111	0.798299	1.48174	0.185655	1.13733	0.0254497	1.59432	2.48084	0.335951	1.26221	0.0133699	1.87387	-2.76052	0.256377	1.19448
723	Tlk2	0.471378	0.326631	0.738891	0.224492	1.16837	0.12028	0.919807	1.6473	0.364798	1.2877	0.0133735	1.87376	-2.76039	0.450835	1.36683
7399	Nme7	0.0410312	1.38689	2.23528	0.180431	1.13322	0.0197341	1.70478	2.6092	0.215738	1.1613	0.0133737	1.87375	-2.76038	0.157662	1.11548
6592	Lsm12	0.197991	0.703354	1.34696	0.106277	1.07645	0.0253896	1.59534	2.48203	0.17746	1.13089	0.0135074	1.86943	-2.75564	0.136143	1.09896
7647	Ak4	0.383887	0.415797	0.897006	0.0942813	1.06753	0.129335	0.888284	1.60501	0.105745	1.07605	0.0135429	1.86829	-2.75439	0.130044	1.09433
7262	Pdk2	0.239168	0.621298	1.22581	0.0735069	1.05227	0.193901	0.71242	1.36007	0.0710054	1.05045	0.0136179	1.86589	-2.75175	0.100096	1.07184
1263	Cdk11b	0.149419	0.825595	1.51955	0.233429	1.17563	0.0181508	1.7411	2.65112	0.283112	1.21682	0.0136583	1.8646	-2.75034	0.203801	1.15173
6148	Pard3	0.0439162	1.35737	2.19975	0.279061	1.2134	0.0124069	1.90634	2.84032	0.31458	1.24365	0.0136944	1.86346	-2.74908	0.214077	1.15996
5467	Washc1	0.182954	0.737658	1.39627	0.165119	1.12126	0.0151727	1.81894	2.74052	0.287282	1.22034	0.013709	1.86299	-2.74857	0.202697	1.15085
4552	Rsl1d1	0.301511	0.520697	1.07006	0.352456	1.27673	0.0695613	1.15763	1.95436	0.408725	1.32751	0.0137191	1.86267	-2.74822	0.397978	1.31766
5699	Taf5l	0.133286	0.875217	1.58735	0.295752	1.22752	0.0184678	1.73358	2.64245	0.477089	1.39193	0.0137807	1.86073	-2.74608	0.342989	1.26838
5677	Fig4	0.0670333	1.17371	1.97447	0.218298	1.16336	0.0108498	1.96458	2.90654	0.289973	1.22262	0.0137984	1.86017	-2.74547	0.193072	1.1432
4437	Smco3	0.0935349	1.02903	1.79073	0.806548	1.74902	0.0337161	1.47216	2.33704	0.828145	1.7754	0.0138629	1.85815	-2.74324	0.655838	1.57553
3468	Sphkap	0.418932	0.377857	0.831134	0.102069	1.07331	0.0286157	1.5434	2.42115	0.26527	1.20186	0.013883	1.85752	-2.74255	0.218111	1.16321
4907	Rbm28	0.336171	0.473439	0.993611	0.247439	1.1871	0.148591	0.828008	1.52288	0.291115	1.22359	0.0139365	1.85585	-2.74072	0.370774	1.29305
6039	Rnf34	0.320164	0.494628	1.02817	0.113836	1.0821	0.000454927	3.34206	4.46388	0.42641	1.34388	0.0139525	1.85535	-2.74017	0.23309	1.17535
6236	Txndc9	0.113753	0.944037	1.67952	0.167092	1.12279	0.0438059	1.35847	2.20107	0.226908	1.17032	0.0140015	1.85383	-2.7385	0.189396	1.14029
3524	Rrp12	0.81357	0.0896053	0.240012	0.177814	1.13117	0.0411891	1.38522	2.23327	0.367643	1.29024	0.014027	1.85304	-2.73763	0.36742	1.29004
1024	Chmp6	0.375124	0.425825	0.914101	0.116759	1.0843	0.023722	1.62485	2.51646	0.278733	1.21313	0.0140339	1.85282	-2.73739	0.21883	1.16379
5531	Cnot6l	0.350964	0.454737	0.962696	0.112821	1.08134	0.241132	0.617746	1.22046	0.126517	1.09166	0.0140761	1.85152	-2.73596	0.208011	1.15509
7381	Dpf1	0.456684	0.340384	0.764058	0.197462	1.14668	0.0166993	1.7773	2.69276	0.43269	1.34975	0.0141177	1.85024	-2.73455	0.327971	1.25525
3482	Asic1	0.153821	0.812985	1.50213	0.683107	1.60559	0.0368856	1.43314	2.29063	0.971123	1.96037	0.0141396	1.84956	-2.73381	0.785058	1.72316
5980	Klhl22	0.296686	0.527703	1.0812	0.124132	1.08985	0.0699015	1.15551	1.95171	0.198985	1.14789	0.0142335	1.84669	-2.73064	0.192275	1.14256
5964	Rfc4	0.189146	0.723203	1.37558	0.262012	1.19915	0.0785056	1.1051	1.88814	0.225831	1.16945	0.0142948	1.84482	-2.72859	0.219547	1.16437
5808	Lpin1	0.162932	0.787994	-1.46736	-0.694953	0.617729	0.0123095	1.90976	-2.84422	-1.8595	0.275571	0.0143466	1.84325	2.72686	-1.2626	0.416793
3353	Rab3ip	0.0567116	1.24633	2.06448	0.18341	1.13556	0.161095	0.792917	1.47424	0.16594	1.1219	0.0143639	1.84273	-2.72629	0.206396	1.1538
5807	Sh2b1	0.190608	0.719859	1.37078	0.144234	1.10514	0.00260412	2.58434	3.60402	0.250498	1.18962	0.0143903	1.84193	-2.72541	0.146948	1.10722
3480	Znf532	0.14336	0.843571	1.54425	0.239407	1.18051	0.0604069	1.21891	2.03066	0.275018	1.21001	0.0144126	1.84126	-2.72467	0.246882	1.18664
107	Map7d1	0.211912	0.673845	1.30394	0.16829	1.12373	0.0323314	1.49038	2.35862	0.234355	1.17638	0.0144216	1.84099	-2.72437	0.186068	1.13766
4959	Vps50	0.459092	0.3381	0.759899	0.106354	1.0765	0.0352518	1.45282	2.31407	0.213238	1.15929	0.0144568	1.83993	-2.72321	0.182892	1.13516
6286	Mrpl33	0.389641	0.409335	0.885923	0.122485	1.08861	0.0178417	1.74856	2.65971	0.238185	1.17951	0.0147754	1.83046	-2.71278	0.177693	1.13107
2485	Pip4p1	0.247925	0.60568	1.20219	0.199963	1.14867	0.0466744	1.33092	2.16777	0.282883	1.21662	0.0148265	1.82896	-2.71113	0.242606	1.18313
4172	Efcab14	0.0155705	1.8077	2.72764	0.325018	1.25268	0.103026	0.987052	1.73614	0.175149	1.12908	0.014907	1.82661	-2.70853	0.19033	1.14102
2054	Ufd1	0.157603	0.802435	1.48749	0.178761	1.13191	0.0344534	1.46277	2.32589	0.235944	1.17768	0.0149607	1.82505	-2.70681	0.186537	1.13803
5171	Babam2	0.27195	0.565511	1.14053	0.128741	1.09334	0.0109758	1.95957	2.90085	0.368461	1.29097	0.0149847	1.82435	-2.70605	0.250207	1.18938
3995	C2cd2l	0.171617	0.765439	1.43568	0.339913	1.26568	0.0304764	1.51604	2.38894	0.471072	1.38614	0.0150127	1.82354	-2.70515	0.364641	1.28756
5486	Cdipt	0.0902523	1.04454	1.81075	0.319848	1.2482	0.0424076	1.37256	2.21805	0.375552	1.29734	0.0150212	1.82329	-2.70488	0.307461	1.23753
6939	Nvl	0.46622	0.331409	0.74767	0.170721	1.12562	0.00885979	2.05258	3.00622	0.38186	1.30302	0.0150995	1.82104	-2.70239	0.2638	1.20064
2196	Slc35b1	0.0820527	1.08591	1.86374	0.479902	1.39465	0.152314	0.817259	1.50805	0.31813	1.24671	0.0151412	1.81984	-2.70107	0.380839	1.3021
1683	Sh3bp1	0.0740801	1.1303	1.92	0.550473	1.46457	0.0407953	1.38939	2.23828	0.559131	1.47338	0.0151709	1.81899	-2.70013	0.45373	1.36958
5432	Sco2	0.207005	0.684019	1.31884	0.19351	1.14354	0.687108	0.162975	0.410688	0.0577331	1.04083	0.0153095	1.81504	-2.69577	0.312103	1.24152
1448	Csk	0.146512	0.834126	1.53129	0.0987143	1.07082	0.0115442	1.93763	2.87593	0.169578	1.12473	0.0153784	1.81309	-2.69362	0.112691	1.08124
7361	Dkk3	0.25143	0.599582	1.19292	0.231353	1.17394	0.0419361	1.37741	2.22389	0.430407	1.34761	0.0153859	1.81288	-2.69339	0.358481	1.28208
7370	Srcin1	0.8181	0.0871934	0.234063	0.0617228	1.04371	0.0479058	1.31961	2.15405	0.219301	1.16417	0.0153888	1.8128	-2.6933	0.221772	1.16617
206	Dlgap4	0.721167	0.141964	0.363687	0.0636439	1.0451	0.0588885	1.22997	2.04432	0.165669	1.12169	0.0154238	1.81181	-2.69221	0.170701	1.12561
6999	Bap18	0.0997909	1.00091	1.75423	0.22023	1.16492	0.0444887	1.35175	2.19296	0.272044	1.20752	0.0154276	1.8117	-2.69209	0.224041	1.168
7147	Psmg2	0.17853	0.748289	1.41141	0.172333	1.12688	0.107686	0.967839	1.71094	0.188083	1.13925	0.015429	1.81166	-2.69205	0.198483	1.14749
6610	Pyurf	0.384216	0.415424	0.896369	0.692505	1.61609	0.204138	0.690076	1.32767	0.818907	1.76407	0.0154523	1.81101	-2.69132	1.20378	2.30342
130	Ppig	0.586807	0.231505	0.555404	0.122818	1.08886	0.0241049	1.61789	2.50835	0.251768	1.19067	0.0155043	1.80955	-2.68971	0.205278	1.15291
3990	Vrk1	0.18931	0.722827	1.37504	0.430121	1.34735	0.0480537	1.31827	2.15242	0.566153	1.48057	0.0155187	1.80914	-2.68927	0.478792	1.39358
7346	Edf1	0.195002	0.709962	1.35652	0.222347	1.16663	0.0236018	1.62705	2.51903	0.354025	1.27812	0.0156784	1.8047	-2.68436	0.261441	1.19868
2593	Tnrc6c	0.0877614	1.0567	1.82638	0.285635	1.21895	0.0145072	1.83842	2.76282	0.36172	1.28496	0.0156814	1.80461	-2.68426	0.245413	1.18543
3984	Fbll1	0.0921617	1.03545	1.79903	0.336108	1.26235	0.0149239	1.82612	2.74874	0.411743	1.33029	0.0157599	1.80245	-2.68187	0.28025	1.21441
3438	Carmil1	0.609919	0.214728	0.521079	0.149521	1.1092	0.0670574	1.17355	1.97428	0.292115	1.22443	0.0157739	1.80206	-2.68144	0.29879	1.23011
5882	Prmt3	0.0222799	1.65209	2.54814	0.248679	1.18812	0.00509759	2.29264	3.27661	0.315803	1.2447	0.0157839	1.80179	-2.68114	0.192667	1.14287
6381	Zmym2	0.272632	0.564423	1.13884	0.121425	1.08781	0.0121754	1.91452	2.84964	0.283933	1.21751	0.0159042	1.79849	-2.6775	0.193308	1.14338
1563	Pcyt1a	0.165543	0.78109	1.45769	0.235686	1.17747	0.131109	0.882369	1.59702	0.205857	1.15337	0.0159135	1.79823	-2.67722	0.231321	1.17391
3366	Slain1	0.0873435	1.05877	1.82904	0.689704	1.61295	0.0263401	1.57938	2.46337	0.931987	1.9079	0.0159676	1.79676	-2.67559	0.69042	1.61375
1404	Gpm6b	0.255953	0.591839	1.1811	0.162274	1.11905	0.0112609	1.94843	2.8882	0.349701	1.2743	0.0159789	1.79645	-2.67525	0.234826	1.17676
7616	Pus1	0.268029	0.571818	1.1503	0.216929	1.16226	0.0795768	1.09921	1.88067	0.260677	1.19804	0.0159938	1.79605	-2.6748	0.253162	1.19182
6892	Pelp1	0.24685	0.607567	1.20506	0.163986	1.12038	0.0823436	1.08437	1.86178	0.171746	1.12642	0.0160004	1.79587	-2.6746	0.167629	1.12321
3530	Gga2	0.236528	0.626118	1.23306	0.28534	1.2187	0.1533	0.814458	1.50417	0.276874	1.21157	0.0160055	1.79573	-2.67445	0.336167	1.2624
6133	Mrpl34	0.219421	0.658721	1.28165	0.298628	1.22997	0.096581	1.01511	1.7727	0.35841	1.28201	0.0160946	1.79332	-2.67178	0.364723	1.28763
3551	Caskin1	0.351715	0.453809	0.961151	0.154166	1.11278	0.0190959	1.71906	2.62569	0.262266	1.19936	0.0161132	1.79282	-2.67123	0.192688	1.14289
3254	Zyx	0.149399	0.825654	1.51963	0.146308	1.10673	0.076534	1.11615	1.90213	0.134858	1.09799	0.0161605	1.79155	-2.66982	0.126335	1.09152
3132	Slc20a1	0.238282	0.622909	1.22824	0.313808	1.24298	0.0864722	1.06312	1.83462	0.439372	1.35601	0.0161943	1.79064	-2.66882	0.433227	1.35025
2	Igkv2-109	0.0707865	1.15005	1.94485	1.32858	2.51155	0.134728	0.870541	1.58101	1.07646	2.10886	0.01623	1.78968	-2.66776	1.21228	2.31704
1152	Ctsa	0.182584	0.738537	1.39753	0.210644	1.1572	0.0281239	1.55092	2.43	0.334461	1.26091	0.0162616	1.78884	-2.66682	0.25222	1.19104
1557	Ercc3	0.184726	0.733472	1.39029	0.122887	1.08891	0.00137125	2.86288	3.91755	0.274871	1.20989	0.0163379	1.7868	-2.66457	0.151358	1.11061
3823	Dzip3	0.265022	0.576718	1.15787	0.0899446	1.06433	0.0273096	1.56369	2.44497	0.212315	1.15855	0.0163525	1.78642	-2.66414	0.161648	1.11856
7708	Smarcb1	0.251269	0.599861	1.19334	0.149886	1.10948	0.0779444	1.10822	1.89209	0.199228	1.14808	0.0163553	1.78634	-2.66406	0.190723	1.14134
3608	Ado	0.165263	0.781823	1.45872	0.146016	1.10651	0.0165281	1.78178	2.6979	0.234791	1.17674	0.0165035	1.78242	-2.65973	0.162147	1.11895
5549	Rbm39	0.259685	0.585554	1.17146	0.193404	1.14346	0.00953329	2.02076	2.97022	0.344108	1.26937	0.0165598	1.78095	-2.65809	0.225395	1.1691
5356	Cuedc1	0.0894667	1.04834	1.81564	0.319593	1.24798	0.0680962	1.16688	1.96594	0.28905	1.22184	0.0166428	1.77877	-2.65568	0.260091	1.19755
2807	Tut7	0.397837	0.400295	0.870325	0.121326	1.08773	0.0813183	1.08981	1.86871	0.159305	1.11675	0.0166536	1.77849	-2.65537	0.159548	1.11694
2814	Kctd16	0.383378	0.416373	0.897991	0.117299	1.0847	0.0324635	1.48861	2.35653	0.268061	1.20419	0.016713	1.77695	-2.65366	0.215288	1.16094
5892	Glyr1	0.394309	0.404164	0.877014	0.221719	1.16612	0.0412153	1.38494	2.23294	0.372793	1.29486	0.0167833	1.77512	-2.65164	0.31445	1.24354
6788	Fam241b	0.545591	0.263133	0.618396	0.0823173	1.05872	0.0949892	1.02233	1.78206	0.162492	1.11922	0.0168501	1.7734	-2.64973	0.177905	1.13124
7293	Slc5a3	0.181129	0.742011	1.40248	0.212791	1.15893	0.104801	0.979636	1.72643	0.231521	1.17407	0.0168761	1.77273	-2.64899	0.237907	1.17928
2564	Wdr41	0.192917	0.71463	1.36325	0.322226	1.25026	0.171762	0.765073	1.43517	0.345858	1.27091	0.0169533	1.77075	-2.64679	0.43184	1.34895
3249	Fkbp3	0.31647	0.499667	1.03632	0.14347	1.10456	0.0135839	1.86698	2.79545	0.271629	1.20717	0.0169872	1.76988	-2.64583	0.187036	1.13842
464	Rab11fip2	0.406613	0.390818	0.853858	0.101193	1.07266	0.0271095	1.56688	2.44872	0.216831	1.16218	0.0170474	1.76834	-2.64413	0.168838	1.12415
1616	Kcnj4	0.204509	0.689287	1.32652	0.226175	1.16973	0.0825238	1.08342	1.86057	0.286875	1.21999	0.0170828	1.76744	-2.64313	0.274107	1.20925
859	Stk16	0.34111	0.467106	0.983186	0.163031	1.11964	0.0972892	1.01194	1.76858	0.207411	1.15461	0.0171321	1.76619	-2.64174	0.214907	1.16063
2337	Agbl4	0.283761	0.547047	1.11172	0.146354	1.10677	0.0305795	1.51457	2.38721	0.280219	1.21438	0.0171399	1.76599	-2.64152	0.216582	1.16198
3301	Pde1c	0.120526	0.918921	1.64612	0.207157	1.15441	0.0354497	1.45039	2.31118	0.284608	1.21808	0.0171699	1.76523	-2.64068	0.220114	1.16483
6960	Mrps11	0.264352	0.577818	1.15956	0.131928	1.09576	0.00831365	2.08021	3.03744	0.284019	1.21758	0.0172171	1.76404	-2.63936	0.182197	1.13461
1033	Atxn1l	0.251471	0.599513	1.19281	0.132994	1.09657	0.269823	0.568922	1.14582	0.0890377	1.06366	0.0172226	1.7639	-2.6392	0.144268	1.10517
7601	Phf2	0.103589	0.984686	1.73305	0.894272	1.85867	0.217414	0.662713	1.28755	0.569124	1.48362	0.0172589	1.76299	-2.63819	0.787053	1.72555
1620	Jak1	0.54983	0.259772	0.611802	0.0400734	1.02817	0.0142431	1.8464	2.77194	0.162378	1.11913	0.017348	1.76075	-2.63571	0.118106	1.08531
292	Arhgef26	0.0524242	1.28047	2.10636	0.192964	1.14311	0.0637171	1.19574	2.00193	0.177498	1.13092	0.0173576	1.76051	-2.63544	0.157014	1.11498
6675	Senp8	0.104174	0.982241	1.72985	1.45987	2.75084	0.155576	0.808059	1.4953	1.27904	2.42677	0.0173784	1.75999	-2.63486	1.50388	2.83604
6014	Rtf2	0.109535	0.960445	1.7012	0.234357	1.17638	0.038068	1.41944	2.27428	0.247418	1.18708	0.0174027	1.75938	-2.63419	0.193482	1.14352
7680	Slit3	0.100775	0.996647	1.74868	0.191501	1.14195	0.806971	0.0931421	-0.248693	-0.0252016	0.982683	0.0174036	1.75936	-2.63416	0.25823	1.19601
3733	Tmsb10	0.217213	0.663115	1.28814	0.155997	1.11419	0.0372197	1.42923	2.28596	0.253687	1.19225	0.0174359	1.75856	-2.63327	0.200151	1.14882
5146	Atat1	0.155156	0.809232	1.49693	0.184044	1.13606	0.00356954	2.44739	3.45031	0.342224	1.26771	0.0175084	1.75675	-2.63127	0.198458	1.14747
7178	Cwc15	0.144984	0.838681	1.53755	0.304525	1.23501	0.107162	0.96996	1.71373	0.273163	1.20845	0.0175671	1.7553	-2.62966	0.279131	1.21346
7559	Mast1	0.533404	0.272944	0.637509	0.13199	1.0958	0.0717524	1.14416	1.93746	0.233066	1.17533	0.0175709	1.75521	-2.62955	0.230962	1.17362
6985	Paics	0.220575	0.656444	1.27829	0.111212	1.08014	0.0196858	1.70585	2.61043	0.17521	1.12913	0.0176552	1.75313	-2.62725	0.123808	1.08961
4622	Tbc1d4	0.0948503	1.02296	1.78288	0.24326	1.18366	0.126164	0.899063	1.61952	0.184978	1.1368	0.0176576	1.75307	-2.62718	0.199565	1.14835
668	Pitpnm1	0.396385	0.401883	0.873073	0.104421	1.07506	0.0634023	1.1979	2.0046	0.161549	1.11849	0.0176943	1.75217	-2.62618	0.148952	1.10876
1365	Vip	0.568266	0.245448	0.583441	0.195272	1.14494	0.06139	1.2119	2.02198	0.414395	1.33274	0.0177141	1.75168	-2.62564	0.39693	1.3167
6392	Nubpl	0.338714	0.470167	0.98823	0.160925	1.118	0.136161	0.865947	1.57477	0.172854	1.12729	0.0177263	1.75138	-2.62531	0.200373	1.149
4423	Tmem177	0.506762	0.295196	0.680166	0.160063	1.11734	0.00896204	2.04759	3.00059	0.35397	1.27807	0.0177411	1.75102	-2.62491	0.239542	1.18062
12	Srcap	0.0198394	1.70247	2.60653	1.3312	2.51613	0.0654912	1.18382	1.98708	0.936149	1.91341	0.0177753	1.75018	-2.62398	0.856776	1.81099
467	Trip12	0.514699	0.288446	0.667327	0.129956	1.09426	0.139669	0.854901	1.55974	0.169502	1.12467	0.0178104	1.74933	-2.62302	0.208843	1.15576
7840	Stk25	0.741614	0.129822	0.335879	0.082765	1.05905	0.0592091	1.22761	2.04141	0.238276	1.17958	0.0178456	1.74847	-2.62207	0.237878	1.17926
4644	Rint1	0.199084	0.700963	1.3435	0.197293	1.14654	0.215544	0.666464	1.29308	0.141715	1.10322	0.0178543	1.74826	-2.62184	0.196214	1.14569
3192	Prkd1	0.17725	0.751414	1.41584	0.448199	1.36434	0.240853	0.618247	1.22121	0.353298	1.27748	0.0178991	1.74717	-2.62063	0.518518	1.43248
3613	Mob4	0.315969	0.500356	1.03743	0.146161	1.10662	0.0890132	1.05055	1.81848	0.29975	1.23093	0.0179254	1.74653	-2.61992	0.297109	1.22868
2005	Ranbp9	0.154194	0.811932	1.50067	0.312775	1.24209	0.0576729	1.23903	2.05549	0.408765	1.32755	0.0179374	1.74624	-2.6196	0.349342	1.27398
4505	Ankrd46	0.0186192	1.73004	2.63836	0.248522	1.18799	0.12806	0.892585	1.6108	0.163069	1.11967	0.0179504	1.74593	-2.61925	0.184468	1.1364
6225	Nudcd2	0.21107	0.675574	1.30647	0.312994	1.24228	0.0156958	1.80422	2.72365	0.521252	1.4352	0.0179848	1.74509	-2.61832	0.354942	1.27893
5953	Wdr77	0.166013	0.779857	1.45596	0.213692	1.15965	0.068629	1.16349	1.9617	0.2196	1.16441	0.017988	1.74502	-2.61824	0.196226	1.1457
2218	Rplp2	0.161242	0.792522	1.47368	0.125755	1.09108	0.0191545	1.71773	2.62416	0.171358	1.12612	0.0179973	1.74479	-2.61799	0.119081	1.08604
1895	Selenot	0.200345	0.698222	1.33952	0.187865	1.13908	0.072793	1.13791	1.92959	0.222788	1.16699	0.018019	1.74427	-2.61741	0.20322	1.15127
3563	Ahdc1	0.0350402	1.45543	2.31718	0.341503	1.26708	0.29203	0.534572	1.09208	0.121979	1.08823	0.0181031	1.74225	-2.61516	0.204024	1.15191
5301	Aagab	0.0227299	1.6434	2.53805	0.279776	1.21401	0.0138623	1.85816	2.78539	0.311355	1.24087	0.0181547	1.74101	-2.61378	0.209921	1.15663
6965	Pycr3	0.110497	0.956651	1.6962	0.200853	1.14938	0.0439697	1.35685	2.19912	0.192773	1.14296	0.0181741	1.74055	-2.61327	0.154133	1.11275
7774	D17h6s53e	0.228007	0.642053	1.25691	1.19158	2.28403	0.152631	0.816358	1.5068	1.33079	2.51541	0.018194	1.74007	-2.61274	1.56414	2.95701
5063	Ctxn1	0.344395	0.462943	0.976308	0.11761	1.08494	0.869803	0.0605792	0.166738	0.0138801	1.00967	0.0182255	1.73932	-2.61191	0.200696	1.14925
3844	Phkb	0.1695	0.77083	1.44328	0.146758	1.10708	0.0150152	1.82347	2.74571	0.242863	1.18334	0.0183149	1.7372	-2.60954	0.162823	1.11948
1303	Mt3	0.149507	0.825338	1.5192	0.257381	1.19531	0.0751969	1.1238	1.9118	0.230029	1.17286	0.0183586	1.73616	-2.60839	0.209427	1.15623
7407	Kcnip3	0.360571	0.443009	0.943103	0.347462	1.27232	0.060833	1.21586	2.02688	0.661856	1.58212	0.0183834	1.73558	-2.60774	0.593635	1.50904
1783	Sash1	0.102682	0.988507	1.73805	0.160632	1.11778	0.00673418	2.17172	3.14063	0.24709	1.18681	0.0183874	1.73548	-2.60763	0.149709	1.10935
5894	Pycr2	0.140791	0.851424	1.55499	0.140311	1.10214	0.0167032	1.7772	2.69265	0.200554	1.14914	0.0183917	1.73538	-2.60752	0.135837	1.09873
5248	Cacul1	0.686492	0.163365	0.411547	0.0682467	1.04844	0.386592	0.412747	0.891782	0.114564	1.08265	0.0185611	1.7314	-2.60309	0.285824	1.21911
1111	Srp54	0.184421	0.734189	1.39132	0.105288	1.07571	0.0180864	1.74265	2.65289	0.150517	1.10997	0.0186123	1.7302	-2.60176	0.103486	1.07437
432	Rps18-ps6	0.276092	0.558946	1.13032	0.133818	1.09719	0.0188418	1.72488	2.63241	0.218836	1.16379	0.0186428	1.72949	-2.60096	0.153731	1.11244
538	Aip	0.618279	0.208815	0.508822	0.0526225	1.03715	0.0167712	1.77544	2.69062	0.176377	1.13004	0.0186453	1.72943	-2.6009	0.131444	1.09539
1844	Rpl37a	0.124954	0.90325	1.62514	0.409231	1.32798	0.0713943	1.14634	1.94019	0.463202	1.3786	0.0186454	1.72943	-2.6009	0.413829	1.33222
4321	Mrps27	0.0533794	1.27263	2.09676	0.25962	1.19716	0.0171396	1.766	2.67977	0.328985	1.25613	0.018646	1.72942	-2.60088	0.223438	1.16751
3300	Sqstm1	0.523543	0.281047	0.653154	0.104887	1.07541	0.0216743	1.66406	2.56204	0.276866	1.21156	0.0186572	1.72915	-2.60059	0.209641	1.1564
6884	Smg9	0.168666	0.772973	1.4463	0.210603	1.15717	0.0817027	1.08776	1.8661	0.286805	1.21994	0.0186778	1.72867	-2.60006	0.267007	1.20331
5695	Rrp9	0.281786	0.55008	1.11647	0.170289	1.12528	0.0918958	1.0367	1.80065	0.19561	1.14521	0.0187087	1.72796	-2.59926	0.19247	1.14272
1031	Clec2l	0.179165	0.746747	1.40922	0.256143	1.19428	0.16851	0.773375	1.44686	0.177266	1.13074	0.0187273	1.72753	-2.59878	0.214167	1.16003
6211	Mrpl24	0.220322	0.656942	1.27902	0.160514	1.11769	0.185748	0.731075	1.38687	0.146808	1.10712	0.0187863	1.72616	-2.59726	0.186936	1.13834
2264	Chat	0.101982	0.991477	1.74193	0.216508	1.16192	0.0634853	1.19733	2.00389	0.245499	1.1855	0.0188177	1.72543	-2.59645	0.212322	1.15855
4077	Grwd1	0.157327	0.803196	1.48855	0.664942	1.5855	0.0993623	1.00278	1.75667	0.659501	1.57954	0.0189434	1.72254	-2.59323	0.648765	1.56783
7632	Faim	0.0922398	1.03508	1.79855	0.143295	1.10442	0.0727124	1.13839	1.9302	0.130173	1.09442	0.0189517	1.72235	-2.59302	0.116528	1.08412
2370	Rpusd3	0.509979	0.292448	0.674949	0.100253	1.07196	0.402341	0.395406	0.861845	0.0573923	1.04058	0.0189815	1.72167	-2.59226	0.137465	1.09997
2431	Cyb5r4	0.132567	0.877563	1.59053	0.176475	1.13012	0.169208	0.771578	1.44433	0.134259	1.09753	0.0189957	1.72134	-2.5919	0.161075	1.11812
473	Tubgcp6	0.283061	0.54812	1.1134	0.192003	1.14235	0.120299	0.919739	1.64721	0.226732	1.17018	0.0190041	1.72115	-2.59168	0.243363	1.18375
6841	Echdc1	0.00873512	2.05873	3.01318	0.205937	1.15343	0.00222678	2.65232	3.68039	0.234296	1.17633	0.0190785	1.71945	-2.58979	0.132366	1.09609
1609	Fabp7	0.119263	0.923494	1.65222	0.223104	1.16724	0.0778841	1.10855	1.89251	0.239423	1.18052	0.019091	1.71917	-2.58947	0.218047	1.16316
3784	Thoc7	0.297708	0.52621	1.07883	0.124513	1.09014	0.0978867	1.00928	1.76513	0.145402	1.10604	0.0191042	1.71887	-2.58914	0.145793	1.10634
5058	Fez1	0.1341	0.872573	1.58376	0.25062	1.18972	0.205061	0.688117	1.32482	0.185333	1.13708	0.019114	1.71865	-2.58889	0.243629	1.18397
6060	Sardh	0.273087	0.5637	1.13772	0.127798	1.09262	0.0204433	1.68945	2.59146	0.207372	1.15458	0.0191342	1.71819	-2.58838	0.146664	1.10701
1027	Pde11a	0.145954	0.835785	1.53357	0.266012	1.20248	0.885132	0.0529919	0.146945	0.0213889	1.01494	0.0191382	1.7181	-2.58828	0.316186	1.24503
3066	Rgl2	0.232487	0.633601	1.24429	0.205262	1.1529	0.046514	1.33242	2.16958	0.251248	1.19024	0.0191533	1.71776	-2.5879	0.204444	1.15224
2487	Srsf6	0.164131	0.784809	1.4629	0.526975	1.4409	0.087849	1.05626	1.82582	0.630625	1.54824	0.0191609	1.71758	-2.5877	0.596386	1.51192
1735	Tm9sf2	0.110177	0.957909	1.69786	0.377893	1.29944	0.0411091	1.38606	2.23429	0.478652	1.39344	0.0192189	1.71627	-2.58624	0.373852	1.29581
1025	H2az1	0.156636	0.805108	1.49121	0.662945	1.58331	0.0784565	1.10537	1.88848	0.741066	1.67141	0.0192304	1.71601	-2.58595	0.67727	1.59911
5607	Ppp1r14a	0.12211	0.91325	1.63854	0.35613	1.27999	0.0253692	1.59569	2.48244	0.404287	1.32343	0.0192421	1.71575	-2.58566	0.289119	1.22189
7489	Macroh2a1	0.489576	0.31018	0.708374	0.240928	1.18175	0.35028	0.455584	0.964104	0.190484	1.14115	0.0192827	1.71483	-2.58464	0.394359	1.31436
7239	Nap1l5	0.235674	0.627688	1.23542	0.187233	1.13858	0.142987	0.844705	1.5458	0.217543	1.16275	0.0192948	1.71456	-2.58433	0.24606	1.18596
2363	Tanc1	0.240252	0.619333	1.22285	0.159117	1.1166	0.05847	1.23307	2.04814	0.198901	1.14782	0.0193619	1.71305	-2.58265	0.170376	1.12535
5874	Traf7	0.146267	0.834854	1.53229	0.419937	1.33787	0.212875	0.671875	1.30104	0.281121	1.21514	0.0193753	1.71275	-2.58232	0.37624	1.29795
3714	Kdm1a	0.317453	0.498321	1.03415	0.209215	1.15606	0.0104159	1.9823	2.92665	0.481425	1.39612	0.0193903	1.71242	-2.58194	0.313361	1.2426
4000	Rraga	0.287364	0.541568	1.10311	0.147655	1.10777	0.0669936	1.17397	1.9748	0.210958	1.15746	0.0194242	1.71166	-2.58109	0.188557	1.13962
5295	Dnttip2	0.127973	0.892882	1.6112	0.231081	1.17371	0.056217	1.25013	2.06916	0.250661	1.18975	0.0194804	1.7104	-2.5797	0.209309	1.15613
1397	Fbl	0.209219	0.6794	1.31208	0.273532	1.20876	0.069671	1.15695	1.95351	0.310706	1.24031	0.0195687	1.70844	-2.57751	0.276061	1.21088
7061	Tpcn1	0.174184	0.758992	1.42658	0.269053	1.20502	0.055419	1.25634	2.07679	0.350496	1.275	0.0196465	1.70672	-2.57558	0.292537	1.22479
2212	Atp9b	0.306739	0.513231	1.05813	0.196834	1.14618	0.049869	1.30217	2.13284	0.308542	1.23846	0.0197868	1.70363	-2.57213	0.256958	1.19496
4255	Psmf1	0.282691	0.548688	1.11429	0.941518	1.92055	0.252064	0.59849	1.19125	0.979615	1.97194	0.0197908	1.70354	-2.57203	1.47787	2.78537
59	Dhx8	0.203585	0.691255	1.32939	0.377127	1.29875	0.0670686	1.17348	1.97419	0.546807	1.46085	0.0198259	1.70277	-2.57118	0.479398	1.39416
6422	Ist1	0.146613	0.833829	1.53089	0.14944	1.10914	0.0536087	1.27076	2.09448	0.163703	1.12016	0.0198362	1.70254	-2.57092	0.13494	1.09805
1461	Pura	0.341249	0.466929	0.982893	0.156864	1.11486	0.023821	1.62304	2.51435	0.253038	1.19171	0.0198513	1.70221	-2.57055	0.18444	1.13638
5242	Adhfe1	0.248235	0.605138	1.20137	0.129115	1.09362	0.146048	0.835505	1.53319	0.129809	1.09415	0.0198576	1.70207	-2.5704	0.147526	1.10767
7102	Rab27a	0.0791685	1.10145	1.8835	0.230438	1.17319	0.0488184	1.31142	2.14409	0.222214	1.16652	0.0198576	1.70207	-2.5704	0.179291	1.13233
1973	Snrpn	0.171947	0.764604	1.43451	0.232465	1.17484	0.0532019	1.27407	2.09853	0.310283	1.23995	0.0198668	1.70187	-2.57017	0.255942	1.19412
2317	Mest	0.169726	0.770251	1.44247	0.565817	1.48023	0.212955	0.671712	1.3008	0.377084	1.29871	0.0199435	1.7002	-2.56831	0.503121	1.41728
2549	Yrdc	0.212517	0.672607	1.30212	0.189504	1.14037	0.0760231	1.11905	1.90581	0.269646	1.20551	0.0199885	1.69922	-2.56721	0.244367	1.18457
1501	Stt3a	0.129888	0.88643	1.60251	0.171471	1.12621	0.0340074	1.46843	2.33261	0.211659	1.15802	0.0200745	1.69735	-2.56513	0.158278	1.11595
3446	Edrf1	0.0952808	1.02099	1.78033	0.236227	1.17791	0.0612348	1.213	2.02334	0.237899	1.17927	0.0201195	1.69638	-2.56404	0.2016	1.14997
3940	Mogs	0.223558	0.65061	1.26964	0.222252	1.16655	0.0126755	1.89704	2.82973	0.369683	1.29207	0.0201454	1.69582	-2.56342	0.240618	1.1815
4266	Snx14	0.188453	0.724796	1.37787	0.125337	1.09076	0.0471263	1.32674	2.16269	0.19323	1.14332	0.0201559	1.6956	-2.56317	0.155081	1.11348
4418	Rpl24	0.400723	0.397156	0.864885	0.128056	1.09282	0.0221235	1.65515	2.55169	0.245747	1.18571	0.0201778	1.69513	-2.56264	0.178671	1.13184
1432	Fen1	0.472899	0.325232	0.736313	0.240465	1.18137	0.136408	0.86516	1.5737	0.39257	1.31273	0.0202411	1.69377	-2.56112	0.457178	1.37285
460	Kbtbd2	0.440292	0.356259	0.792734	0.143112	1.10428	0.0487748	1.3118	2.14456	0.289345	1.22209	0.0203055	1.69239	-2.55958	0.245672	1.18565
7357	Acsl4	0.159327	0.797711	1.48092	0.131512	1.09544	0.0661206	1.17966	1.98191	0.167962	1.12347	0.0203221	1.69203	-2.55918	0.14518	1.10587
396	Bod1l	0.217553	0.662435	1.28714	0.20551	1.15309	0.0314495	1.50239	2.37282	0.290531	1.22309	0.0204015	1.69034	-2.55729	0.215832	1.16137
2176	Polr2c	0.165624	0.780876	1.45739	0.207776	1.15491	0.0419565	1.3772	2.22364	0.290218	1.22283	0.020422	1.6899	-2.5568	0.226126	1.16969
2724	Prr7	0.607075	0.216758	0.525267	0.0547706	1.03869	0.0401376	1.39645	2.24675	0.172435	1.12696	0.0204278	1.68978	-2.55666	0.146125	1.10659
7274	Nectin1	0.25855	0.587456	1.17438	0.242455	1.183	0.0230391	1.63753	2.53122	0.43696	1.35375	0.0205476	1.68724	-2.55382	0.309849	1.23958
1883	Rps13	0.254645	0.594066	1.1845	0.192608	1.14283	0.0416923	1.37994	2.22694	0.253591	1.19217	0.020562	1.68693	-2.55348	0.199742	1.14849
2259	Sap30bp	0.0733313	1.13471	1.92556	0.22742	1.17074	0.0592509	1.2273	2.04103	0.221162	1.16567	0.0205667	1.68683	-2.55337	0.185706	1.13737
1057	H1-0	0.619802	0.207747	0.506598	0.178506	1.13171	0.247926	0.605678	1.20219	0.205754	1.15329	0.0206475	1.68513	-2.55146	0.337054	1.26317
2075	Eif4ebp2	0.139948	0.854034	1.55855	0.285722	1.21902	0.147844	0.830197	1.52589	0.248969	1.18836	0.0206722	1.68461	-2.55088	0.27728	1.21191
3204	Ssr4	0.0681917	1.16627	1.96518	0.211319	1.15775	0.0159813	1.79639	2.71467	0.234341	1.17637	0.0207564	1.68285	-2.54891	0.154578	1.1131
2411	Wdr36	0.561394	0.250732	0.593954	0.19988	1.1486	0.0485632	1.31369	2.14686	0.401008	1.32043	0.0208148	1.68163	-2.54754	0.348465	1.27321
2797	Galns	0.440489	0.356065	0.792385	0.126016	1.09128	0.105478	0.976839	1.72276	0.163709	1.12016	0.0208929	1.68	-2.54572	0.170606	1.12553
7380	Dguok	0.236577	0.626028	1.23293	0.207325	1.15455	0.00504375	2.29725	3.28179	0.486581	1.40112	0.0209512	1.67879	-2.54437	0.286096	1.21934
5128	Slc38a1	0.232033	0.63445	1.24556	0.177757	1.13112	0.0329412	1.48226	2.34902	0.233768	1.1759	0.0209524	1.67877	-2.54434	0.174667	1.1287
4354	Unc80	0.623215	0.205362	0.501622	0.0862951	1.06164	0.103809	0.983766	1.73184	0.179593	1.13256	0.0209726	1.67835	-2.54387	0.195663	1.14525
3225	Snrnp70	0.141822	0.848257	1.55066	0.388904	1.3094	0.0512827	1.29003	2.11804	0.462717	1.37813	0.021014	1.67749	-2.54291	0.373548	1.29553
5068	Tmem41b	0.0676805	1.16954	1.96926	1.03179	2.04456	0.0341077	1.46715	2.33109	1.12264	2.17745	0.0210478	1.67679	-2.54213	0.835517	1.7845
7555	Foxo1	0.472702	0.325412	0.736646	0.199755	1.1485	0.0985932	1.00615	1.76106	0.328199	1.25545	0.0210684	1.67637	-2.54166	0.336597	1.26277
233	Ankrd44	0.134776	0.870389	1.5808	0.258931	1.19659	0.0367859	1.43432	2.29204	0.315407	1.24436	0.0210834	1.67606	-2.54131	0.237439	1.1789
6478	Ssu72	0.387605	0.41161	0.889832	0.202552	1.15073	0.123655	0.907787	1.63122	0.331276	1.25813	0.0210904	1.67592	-2.54115	0.359451	1.28294
4161	Reep1	0.19366	0.71296	1.36084	0.349967	1.27453	0.0490624	1.30925	2.14146	0.513477	1.42749	0.0211184	1.67534	-2.5405	0.41241	1.33091
5040	Cdk17	0.448381	0.348353	0.778502	0.174415	1.12851	0.0598952	1.22261	2.03523	0.282955	1.21668	0.0211216	1.67527	-2.54043	0.250368	1.18951
3410	Armcx2	0.392382	0.406291	0.880684	0.157255	1.11516	0.409542	0.387702	0.848416	0.116583	1.08416	0.0211319	1.67506	-2.54019	0.262797	1.1998
3313	Sord	0.118722	0.925467	1.65485	0.215899	1.16143	0.201056	0.696682	1.33728	0.157507	1.11536	0.0212151	1.67335	-2.53828	0.200326	1.14896
5407	Nae1	0.230326	0.637656	1.25035	0.0989384	1.07099	0.0320257	1.4945	2.3635	0.223534	1.16759	0.0212472	1.6727	-2.53754	0.165693	1.12171
1888	Lsm6	0.300333	0.522397	1.07276	0.168491	1.12388	0.0422495	1.37418	2.22	0.218351	1.1634	0.0212548	1.67254	-2.53737	0.172791	1.12724
4662	Anapc2	0.0981913	1.00793	1.76337	0.156571	1.11464	0.0391497	1.40727	2.25972	0.171096	1.12591	0.0212921	1.67178	-2.53652	0.13007	1.09435
7717	Lipa	0.27906	0.554303	1.12308	0.128676	1.09329	0.620674	0.207137	0.505326	0.0567139	1.04009	0.0213594	1.67041	-2.53498	0.222018	1.16636
6127	Sytl2	0.238498	0.622515	1.22765	0.152207	1.11127	0.14373	0.842453	1.54272	0.145186	1.10587	0.0214293	1.66899	-2.53339	0.160862	1.11795
7341	Stard10	0.24316	0.614107	1.21496	0.151547	1.11076	0.0152659	1.81628	2.73748	0.284226	1.21776	0.0214342	1.66889	-2.53328	0.188003	1.13919
2494	Fam131b	0.317311	0.498515	1.03446	0.239103	1.18026	0.0518627	1.28515	2.11207	0.41499	1.33329	0.0214791	1.66798	-2.53226	0.343596	1.26892
1525	Rplp1	0.0607217	1.21666	2.02787	0.158087	1.11581	0.0852986	1.06906	1.84222	0.207624	1.15478	0.0215033	1.66749	-2.53171	0.191278	1.14177
6830	Tmem160	0.236017	0.627058	1.23447	0.272229	1.20767	0.0679913	1.16755	1.96677	0.4181	1.33617	0.0215385	1.66678	-2.53092	0.363785	1.2868
4301	Zc2hc1a	0.327285	0.485074	1.01265	0.130784	1.09489	0.0306498	1.51357	2.38603	0.221876	1.16625	0.0215592	1.66637	-2.53045	0.165575	1.12161
4853	Ttc27	0.490133	0.309686	0.707451	0.0677471	1.04808	0.00731665	2.13569	3.10004	0.276559	1.2113	0.0215935	1.66568	-2.52967	0.175571	1.12941
4803	Dido1	0.342215	0.4657	0.980866	0.164073	1.12045	0.0189731	1.72186	2.62893	0.265797	1.2023	0.0216311	1.66492	-2.52882	0.1841	1.13611
179	Dpy19l1	0.266255	0.574703	1.15476	0.191729	1.14213	0.0244067	1.61249	2.50205	0.296053	1.22778	0.0216706	1.66413	-2.52794	0.210055	1.15673
3960	Tdrkh	0.357173	0.447122	0.949992	0.121972	1.08822	0.0164758	1.78315	2.69949	0.225306	1.16903	0.0216811	1.66392	-2.5277	0.153353	1.11215
3993	Tmem106b	0.0691371	1.16029	1.95769	0.205765	1.1533	0.0816214	1.0882	1.86665	0.198537	1.14753	0.0217204	1.66313	-2.52682	0.179816	1.13274
5809	Necab2	0.260742	0.583788	1.16875	0.138176	1.10051	0.0847373	1.07193	1.84589	0.176454	1.1301	0.0217798	1.66195	-2.52549	0.163389	1.11992
7845	Keap1	0.219082	0.659393	1.28265	0.167633	1.12321	0.130043	0.885914	1.60181	0.161295	1.11829	0.0217974	1.6616	-2.52509	0.170698	1.1256
6705	Etnk1	0.339629	0.468995	0.9863	0.160781	1.11789	0.059726	1.22384	2.03675	0.261686	1.19888	0.0218291	1.66097	-2.52439	0.224198	1.16813
4620	Fam234b	0.260093	0.584872	1.17042	0.320056	1.24838	0.0641599	1.19274	1.99819	0.499505	1.41373	0.0218505	1.66054	-2.52391	0.428802	1.34612
2320	Cbfb	0.142354	0.846629	1.54844	0.645948	1.56477	0.0962857	1.01644	1.77443	0.626839	1.54418	0.0218691	1.66017	-2.52349	0.592971	1.50835
7183	Eefsec	0.565718	0.2474	0.587332	0.0872522	1.06234	0.0946109	1.02406	1.7843	0.188751	1.13978	0.0218991	1.65957	-2.52283	0.193949	1.14389
1435	Chd1	0.0173187	1.76148	2.67458	1.20331	2.30267	0.0141629	1.84885	2.77474	1.25425	2.38543	0.0219167	1.65922	-2.52243	0.83314	1.78156
3728	Rps27	0.632121	0.1992	0.488702	0.0843262	1.06019	0.0234341	1.63015	2.52263	0.184154	1.13615	0.0219376	1.65881	-2.52197	0.139851	1.10179
214	Otud4	0.548613	0.260734	0.613693	0.0791998	1.05643	0.048882	1.31085	2.1434	0.163476	1.11998	0.0219395	1.65877	-2.52193	0.140067	1.10196
477	AK157302	0.628146	0.201939	0.494457	0.0749038	1.05329	0.0300575	1.52205	2.39602	0.222579	1.16682	0.0219402	1.65876	-2.52191	0.176275	1.12996
3731	Eif2s1	0.247051	0.607213	1.20452	0.171757	1.12643	0.0310693	1.50767	2.37906	0.234626	1.1766	0.0219487	1.65859	-2.52172	0.172395	1.12693
2267	Ddr1	0.0317667	1.49803	2.36767	0.291124	1.22359	0.120901	0.917571	1.64431	0.192778	1.14296	0.0219502	1.65856	-2.52169	0.201998	1.15029
6232	Uqcrq	0.605828	0.21765	0.527106	0.0795962	1.05672	0.231362	0.635707	1.24744	0.111538	1.08038	0.0219658	1.65825	-2.52134	0.170849	1.12572
6492	Pgm3	0.105382	0.977232	1.72328	0.148523	1.10843	0.0298914	1.52445	2.39886	0.190298	1.141	0.0219853	1.65787	-2.52091	0.136799	1.09946
4452	Kirrel3	0.161266	0.792457	1.47359	0.420438	1.33833	0.0813977	1.08939	1.86817	0.501288	1.41548	0.0220598	1.6564	-2.51926	0.451109	1.36709
2480	Pbxip1	0.161328	0.792289	1.47336	0.14081	1.10252	0.033319	1.47731	2.34315	0.187758	1.13899	0.0221034	1.65554	-2.5183	0.1379	1.1003
1156	Zfp37	0.281541	0.550458	1.11706	0.199755	1.1485	0.06622	1.17901	1.98109	0.241383	1.18213	0.022118	1.65525	-2.51798	0.209167	1.15602
4204	Tm9sf4	0.246099	0.60889	1.20706	0.314277	1.24339	0.0465042	1.33251	2.16969	0.418239	1.3363	0.0221245	1.65513	-2.51783	0.331752	1.25854
2972	Slc30a1	0.8214	0.0854455	0.229737	0.0347425	1.02437	0.00953463	2.0207	2.97015	0.237934	1.1793	0.0221675	1.65428	-2.51689	0.166285	1.12216
6452	Sdhd	0.158475	0.800039	1.48416	0.497415	1.41168	0.0785681	1.10475	1.8877	0.602452	1.5183	0.0222302	1.65306	-2.51551	0.53588	1.44983
672	Mrpl23	0.0447038	1.34966	2.19043	0.342402	1.26787	0.322504	0.491465	1.02304	0.15493	1.11337	0.0222306	1.65305	-2.5155	0.265135	1.20175
2788	Srrm1	0.254826	0.593756	1.18403	0.214357	1.16019	0.0692727	1.15944	1.95662	0.25421	1.19268	0.0222324	1.65301	-2.51546	0.221541	1.16598
7847	Plpbp	0.453588	0.343339	0.769425	0.10461	1.0752	0.0311951	1.50591	2.37699	0.219328	1.16419	0.0222606	1.65246	-2.51484	0.167416	1.12304
6461	Pigk	0.108848	0.963178	1.70481	0.158699	1.11628	0.0815773	1.08843	1.86695	0.148617	1.10851	0.022269	1.6523	-2.51466	0.133307	1.0968
5021	Commd10	0.263543	0.579148	1.16161	0.179406	1.13242	0.0696863	1.15685	1.95339	0.263721	1.20057	0.0222992	1.65171	-2.514	0.230396	1.17316
4977	Pak2	0.336071	0.47357	0.993825	0.121251	1.08768	0.0378728	1.42167	2.27694	0.164744	1.12097	0.0223184	1.65134	-2.51358	0.12719	1.09216
6564	Mtpap	0.302119	0.519822	1.06866	0.165704	1.12171	0.137706	0.861049	1.56811	0.166601	1.12241	0.0223252	1.6512	-2.51343	0.182126	1.13455
3370	Ahcyl2	0.0943713	1.02516	1.78573	0.224043	1.168	0.136072	0.866231	1.57516	0.198867	1.1478	0.0223514	1.65069	-2.51286	0.21109	1.15756
3255	Ift52	0.713238	0.146765	0.374549	0.114613	1.08268	0.0112588	1.94851	2.88829	0.287413	1.22045	0.0224441	1.6489	-2.51084	0.199304	1.14814
7585	Lypla2	0.255933	0.591873	1.18115	0.226403	1.16991	0.0322291	1.49175	2.36025	0.416407	1.3346	0.0225289	1.64726	-2.509	0.306895	1.23704
3964	Mtrfr	0.10043	0.998137	1.75062	0.352489	1.27676	0.0468526	1.32927	2.16576	0.420866	1.33873	0.0225359	1.64712	-2.50885	0.328762	1.25593
1937	Rpl32	0.385594	0.413869	0.893705	0.138028	1.1004	0.0151303	1.82015	2.74191	0.255949	1.19412	0.0225445	1.64696	-2.50866	0.171862	1.12651
3753	Ccdc25	0.59313	0.22685	0.545946	0.369048	1.2915	0.297139	0.52704	1.08015	0.377182	1.2988	0.0225625	1.64661	-2.50827	0.672867	1.59424
5620	Terf2ip	0.138193	0.859514	1.56602	0.250615	1.18971	0.0258158	1.58811	2.47358	0.323339	1.25122	0.0225634	1.6466	-2.50825	0.225975	1.16957
22	Frmpd3	0.483625	0.315491	0.718276	0.113472	1.08183	0.310324	0.508185	1.05004	0.129847	1.09418	0.0225858	1.64616	-2.50777	0.230781	1.17347
194	Phactr2	0.153005	0.815295	1.50533	0.262654	1.19968	0.0418062	1.37876	2.22551	0.296211	1.22792	0.0226187	1.64553	-2.50706	0.226137	1.1697
4530	Gprasp2	0.240581	0.618739	1.22195	0.244119	1.18437	0.0533909	1.27253	2.09665	0.359027	1.28256	0.0226365	1.64519	-2.50667	0.291975	1.22432
5441	Fam20b	0.147805	0.830311	1.52605	0.202477	1.15067	0.0690382	1.16091	1.95847	0.23566	1.17745	0.0226984	1.644	-2.50534	0.201532	1.14992
3724	Syne2	0.223906	0.649935	1.26864	0.42115	1.33899	0.100055	0.99976	1.75274	0.518091	1.43206	0.0227143	1.6437	-2.505	0.49698	1.41126
387	Pcdhb9	0.010637	1.97318	2.9163	2.82972	7.10934	0.00332645	2.47802	3.48468	3.26985	9.64549	0.0227348	1.64331	-2.50456	1.86011	3.63035
679	Ap3d1	0.427378	0.369188	0.815803	0.20593	1.15343	0.0780134	1.10783	1.8916	0.303956	1.23453	0.0227371	1.64327	-2.50451	0.282061	1.21593
1756	Tbc1d10a	0.226997	0.643979	1.25978	0.134346	1.0976	0.00405859	2.39162	3.38774	0.275595	1.21049	0.0227513	1.64299	-2.5042	0.156616	1.11467
1710	Ctbp2	0.104382	0.981376	1.72871	0.15138	1.11063	0.020299	1.69253	2.59503	0.208901	1.15581	0.022797	1.64212	-2.50322	0.140195	1.10205
3678	Wdfy3	0.643752	0.191281	0.471953	0.0733163	1.05213	0.116958	0.931969	1.6635	0.134654	1.09783	0.0228208	1.64167	-2.50271	0.150393	1.10987
4397	Coq3	0.347819	0.458647	0.969192	0.120767	1.08731	0.0607758	1.21627	2.02739	0.229559	1.17248	0.0228523	1.64107	-2.50204	0.195914	1.14545
5879	Tubb6	0.047245	1.32564	2.16137	0.264969	1.20161	0.0581185	1.23569	2.05137	0.244977	1.18507	0.0229091	1.63999	-2.50083	0.202933	1.15104
6414	Uqcc1	0.167593	0.775744	1.45019	0.221631	1.16605	0.0121684	1.91477	2.84992	0.360385	1.28377	0.0229465	1.63928	-2.50003	0.226463	1.16996
1847	Arf4	0.235842	0.627378	1.23496	0.139333	1.1014	0.0739864	1.13085	1.9207	0.169091	1.12435	0.0229467	1.63928	-2.50002	0.148507	1.10842
3937	Rab3gap1	0.502562	0.29881	0.687007	0.0877838	1.06274	0.0153449	1.81404	2.73491	0.210384	1.157	0.0229692	1.63885	-2.49954	0.144332	1.10522
6650	Bcas2	0.358723	0.44524	0.946843	0.186507	1.13801	0.0246822	1.60762	2.49636	0.325626	1.25321	0.0229899	1.63846	-2.4991	0.232726	1.17505
5911	Polr2h	0.188588	0.724486	1.37742	0.33537	1.2617	0.0526646	1.27848	2.10393	0.492041	1.40643	0.0230174	1.63794	-2.49852	0.394716	1.31468
2207	Apba2	0.268112	0.571684	1.15009	0.135712	1.09863	0.044291	1.35368	2.1953	0.206038	1.15352	0.0230903	1.63657	-2.49698	0.161007	1.11807
6737	Mrrf	0.18104	0.742224	1.40278	0.198283	1.14733	0.0335718	1.47403	2.33925	0.230906	1.17357	0.0231111	1.63618	-2.49654	0.168818	1.12414
1349	Aimp1	0.629281	0.201155	0.492812	0.135249	1.09828	0.045571	1.34131	2.18035	0.271364	1.20695	0.0231124	1.63616	-2.49651	0.230689	1.1734
3256	Ptp4a1	0.139919	0.854123	1.55867	0.177625	1.13102	0.047533	1.323	2.15817	0.200996	1.14949	0.023121	1.63599	-2.49633	0.156835	1.11484
791	Vamp4	0.301867	0.520184	1.06924	0.158893	1.11643	0.0426962	1.36961	2.2145	0.261326	1.19858	0.0232165	1.6342	-2.49431	0.203664	1.15162
2965	Rgl1	0.224546	0.648695	1.2668	0.459304	1.37488	0.239034	0.621541	1.22618	0.348672	1.27339	0.0232502	1.63357	-2.4936	0.483132	1.39777
360	Scaf11	0.222062	0.653526	1.27397	0.272006	1.20749	0.0966653	1.01473	1.77221	0.325563	1.25315	0.0232902	1.63283	-2.49276	0.307239	1.23734
359	Ascc3	0.27913	0.554194	1.12291	0.153336	1.11214	0.203054	0.692387	1.33104	0.146624	1.10698	0.0233324	1.63204	-2.49187	0.187723	1.13896
4087	Bbs9	0.350816	0.45492	0.963	0.209315	1.15614	0.0784963	1.10515	1.8882	0.307656	1.2377	0.0233414	1.63187	-2.49169	0.279532	1.2138
7740	Adnp	0.490774	0.309118	0.706388	0.113606	1.08193	0.0422811	1.37385	2.21961	0.203607	1.15157	0.0233803	1.63115	-2.49087	0.164385	1.12069
4588	Gemin5	0.254425	0.59444	1.18507	0.14948	1.10917	0.0220699	1.6562	2.55292	0.24292	1.18339	0.0233805	1.63115	-2.49087	0.166958	1.12269
3016	Papss1	0.190461	0.720195	1.37126	0.166414	1.12227	0.045493	1.34206	2.18125	0.235569	1.17737	0.0234606	1.62966	-2.4892	0.182451	1.13481
6724	Cmtm5	0.0882044	1.05451	1.82357	0.233624	1.17578	0.125011	0.903051	1.62487	0.185336	1.13708	0.0235025	1.62889	-2.48832	0.188947	1.13993
2164	Ppp4c	0.167694	0.775483	1.44982	0.112486	1.08109	0.0155383	1.8086	2.72867	0.260173	1.19762	0.0235058	1.62882	-2.48825	0.167956	1.12347
6363	Lrrc40	0.307808	0.51172	1.05571	0.170465	1.12542	0.13831	0.859146	1.56552	0.169038	1.12431	0.0235094	1.62876	-2.48818	0.183111	1.13533
3015	Pla2g7	0.36647	0.435962	0.931253	0.115268	1.08318	0.193617	0.713057	1.36098	0.131513	1.09544	0.0235099	1.62875	-2.48817	0.16738	1.12302
2328	Pecam1	0.211191	0.675325	1.30611	0.350072	1.27462	0.181586	0.740918	1.40092	0.284035	1.2176	0.0235454	1.62809	-2.48743	0.339292	1.26514
7796	Baz1b	0.547177	0.261872	0.615926	0.179897	1.1328	0.131815	0.880035	1.59387	0.241957	1.1826	0.023568	1.62768	-2.48696	0.272587	1.20797
1562	Ptpre	0.216249	0.665046	1.29099	0.119949	1.0867	0.0681383	1.16661	1.9656	0.1406	1.10236	0.0235699	1.62764	-2.48692	0.119849	1.08662
6941	Rgs3	0.0548173	1.26108	2.08261	0.238613	1.17986	0.193619	0.713052	1.36098	0.136273	1.09906	0.0235952	1.62718	-2.4864	0.168358	1.12378
6447	Cenpv	0.411468	0.385664	0.84485	0.160666	1.1178	0.0734029	1.13429	1.92503	0.232349	1.17475	0.023687	1.62549	-2.4845	0.209289	1.15612
4261	Rbm22	0.08775	1.05675	1.82645	0.212135	1.1584	0.00983904	2.00705	2.9547	0.323769	1.2516	0.0237734	1.62391	-2.48271	0.196345	1.14579
4711	Myo9a	0.676886	0.169484	0.424978	0.0801106	1.0571	0.0810159	1.09143	1.87077	0.190897	1.14147	0.023776	1.62386	-2.48266	0.188753	1.13978
4269	Mal2	0.39636	0.40191	0.87312	0.232417	1.1748	0.040718	1.39021	2.23927	0.47601	1.39089	0.023795	1.62351	-2.48227	0.372311	1.29442
7352	Csnk1e	0.473175	0.324979	0.735847	0.0807514	1.05757	0.028015	1.55261	2.43198	0.231563	1.17411	0.0238526	1.62246	-2.48109	0.171631	1.12633
7830	Vamp5	0.0573298	1.24162	2.05869	0.26651	1.20289	0.247321	0.606739	1.2038	0.148248	1.10822	0.023868	1.62218	-2.48077	0.208029	1.15511
1871	Ppp1cb	0.13547	0.868156	1.57777	0.305665	1.23599	0.0219176	1.65921	2.55641	0.475446	1.39035	0.0238935	1.62172	-2.48025	0.320557	1.24881
5231	Gtf2f2	0.231228	0.63596	1.24781	0.208151	1.15521	0.0114817	1.93999	2.87862	0.33489	1.26128	0.0239087	1.62144	-2.47994	0.209266	1.1561
4598	Commd2	0.0397711	1.40043	2.25153	0.337203	1.26331	0.415491	0.381438	0.837436	0.104984	1.07548	0.023913	1.62137	-2.47985	0.221241	1.16574
841	Cops6	0.259453	0.585941	1.17206	0.136384	1.09915	0.045912	1.33807	2.17643	0.208378	1.15539	0.0239236	1.62117	-2.47963	0.162681	1.11937
6855	Cnpy3	0.108288	0.965421	1.70776	0.17175	1.12642	0.338365	0.470615	0.988967	0.118032	1.08525	0.0239587	1.62054	-2.47891	0.203057	1.15114
5468	Phip	0.417704	0.379131	0.833379	0.23734	1.17882	0.0901582	1.04499	1.81133	0.332271	1.25899	0.0239626	1.62047	-2.47883	0.316969	1.24571
2957	Gm2a	0.516097	0.287269	0.665078	0.0862414	1.0616	0.149595	0.825084	1.51885	0.136996	1.09961	0.0240231	1.61937	-2.4776	0.160204	1.11744
7612	Ptpn4	0.13202	0.879361	1.59296	0.331621	1.25843	0.16995	0.769678	1.44166	0.252894	1.19159	0.0240627	1.61866	-2.47679	0.289448	1.22217
2975	Khdrbs1	0.346667	0.460087	0.97158	0.13934	1.1014	0.0197724	1.70394	2.60823	0.236196	1.17788	0.0240894	1.61817	-2.47625	0.161317	1.11831
3488	Dnajc8	0.294559	0.530828	1.08615	0.0962747	1.06901	0.0253653	1.59576	2.48252	0.183035	1.13527	0.0241571	1.61695	-2.47487	0.128621	1.09325
1627	Uck1	0.22916	0.639862	1.25364	0.219309	1.16418	0.207309	0.683383	1.31791	0.20963	1.15639	0.0241708	1.61671	-2.47459	0.266407	1.20281
7485	Ubqln2	0.326575	0.486017	1.01418	0.11313	1.08157	0.079856	1.09769	1.87873	0.195667	1.14525	0.0242801	1.61475	-2.47238	0.176224	1.12992
3697	Kcnt1	0.380538	0.419602	0.903508	0.124886	1.09042	0.0310941	1.50732	2.37865	0.30107	1.23206	0.0243026	1.61435	-2.47193	0.222143	1.16646
2685	Smim15	0.0923049	1.03478	1.79816	0.327453	1.2548	0.0773254	1.11168	1.89647	0.294835	1.22674	0.0243272	1.61391	-2.47143	0.256674	1.19472
6426	Gemin6	0.589054	0.229845	0.552037	0.0597712	1.0423	0.123916	0.906871	1.63	0.130081	1.09436	0.0243336	1.61379	-2.4713	0.143557	1.10463
4626	Yars2	0.495261	0.305166	0.69898	0.0691762	1.04912	0.281411	0.550658	1.11738	0.0853564	1.06095	0.0245609	1.60976	-2.46675	0.138225	1.10055
7369	Phc2	0.083629	1.07764	1.8532	0.343464	1.2688	0.379565	0.420714	0.905403	0.158894	1.11643	0.0245825	1.60937	-2.46631	0.300106	1.23123
2148	Arhgap5	0.204382	0.689558	1.32692	0.170567	1.1255	0.0340826	1.46747	2.33147	0.204027	1.15191	0.0246103	1.60888	-2.46576	0.148264	1.10823
3228	Phlda1	0.198478	0.702288	1.34542	0.551231	1.46533	0.103076	0.986843	1.73587	0.643714	1.56235	0.0246335	1.60847	-2.4653	0.610753	1.52706
7314	Grb14	0.456488	0.340571	0.764398	0.131177	1.09519	0.120009	0.920787	1.64861	0.224436	1.16832	0.0246543	1.60811	-2.46488	0.235743	1.17751
7507	Clcn2	0.183506	0.73635	1.3944	0.122229	1.08842	0.112494	0.948869	1.68592	0.125933	1.09121	0.0247159	1.60702	-2.46366	0.122674	1.08875
7255	Cacng3	0.269815	0.568935	1.14584	0.514723	1.42872	0.0519256	1.28462	2.11143	0.836331	1.7855	0.0247318	1.60674	-2.46334	0.66719	1.58798
819	Tulp3	0.173969	0.759527	1.42734	0.211137	1.1576	0.0454637	1.34233	2.18158	0.246884	1.18664	0.0247365	1.60666	-2.46325	0.188964	1.13994
7731	Kcnd3	0.304284	0.51672	1.06371	0.132414	1.09613	0.0702693	1.15323	1.94885	0.213106	1.15918	0.0247467	1.60648	-2.46305	0.183893	1.13595
2255	Ctnnb1	0.879074	0.0559744	0.154759	0.0445052	1.03133	0.0437961	1.35857	2.20119	0.187194	1.13855	0.0248082	1.6054	-2.46183	0.165678	1.12169
3673	Fez2	0.106885	0.971085	1.71521	0.50601	1.42012	0.152649	0.816307	1.50673	0.346339	1.27133	0.0248953	1.60388	-2.46011	0.376247	1.29796
7348	Hdgfl3	0.733076	0.134851	0.347457	0.108569	1.07816	0.0409864	1.38736	2.23585	0.326331	1.25382	0.0248997	1.60381	-2.46002	0.273382	1.20864
4667	Wwp1	0.283473	0.547489	1.11241	0.13232	1.09605	0.0118914	1.92477	2.8613	0.270588	1.2063	0.024989	1.60225	-2.45827	0.169796	1.1249
5734	Wrnip1	0.22485	0.648107	1.26592	0.154928	1.11337	0.0456618	1.34045	2.1793	0.295409	1.22723	0.0249976	1.6021	-2.4581	0.227206	1.17057
2330	Tfdp1	0.161454	0.791951	1.47289	0.216898	1.16223	0.208772	0.680328	1.31344	0.155211	1.11358	0.0250312	1.60152	-2.45744	0.19462	1.14442
6600	Mrps25	0.575769	0.239751	0.572038	0.0996735	1.07153	0.064566	1.19	1.99478	0.234096	1.17617	0.0250572	1.60107	-2.45693	0.20904	1.15592
6829	Borcs5	0.0512051	1.29069	2.11884	0.211421	1.15783	0.0617706	1.20922	2.01865	0.205973	1.15346	0.0250842	1.6006	-2.4564	0.170183	1.1252
3136	Grid1	0.333658	0.476699	0.998959	0.143093	1.10427	0.0711484	1.14783	1.94207	0.211127	1.15759	0.0250889	1.60052	-2.45631	0.183237	1.13543
658	Timm44	0.478884	0.319769	0.726219	0.0962509	1.06899	0.0176389	1.75353	2.66543	0.201416	1.14983	0.0250998	1.60033	-2.45609	0.137628	1.1001
6630	Necap2	0.0607424	1.21651	2.02768	0.301761	1.23265	0.114619	0.940744	1.67516	0.195058	1.14477	0.0251115	1.60013	-2.45586	0.191892	1.14226
3858	Celf4	0.407234	0.390156	0.852702	0.129662	1.09404	0.0234574	1.62972	2.52213	0.241007	1.18182	0.0251676	1.59916	-2.45477	0.169328	1.12453
4061	Gtf2a2	0.149864	0.824303	1.51777	0.191384	1.14186	0.0292138	1.53441	2.41059	0.247783	1.18738	0.0251775	1.59899	-2.45458	0.17356	1.12784
5025	Spata2	0.565653	0.24745	0.58743	0.0716338	1.05091	0.0770872	1.11302	1.89817	0.171814	1.12647	0.0251877	1.59881	-2.45438	0.160257	1.11749
7176	Lamtor2	0.060269	1.21991	2.03189	0.479729	1.39448	0.033483	1.47518	2.34062	0.493776	1.40813	0.0251906	1.59876	-2.45432	0.356326	1.28016
5245	Iqsec1	0.670708	0.173467	0.43366	0.0723879	1.05146	0.076472	1.1165	1.90257	0.222213	1.16652	0.025194	1.5987	-2.45425	0.212437	1.15864
5922	Cic	0.209529	0.678756	1.31114	0.20547	1.15306	0.10396	0.983133	1.73101	0.215818	1.16136	0.0252194	1.59826	-2.45376	0.204607	1.15237
4759	Lmbrd2	0.296875	0.527426	1.08076	0.117721	1.08502	0.0585775	1.23227	2.04716	0.181769	1.13427	0.0252413	1.59789	-2.45333	0.14912	1.10889
28	Rpl9-ps6	0.163318	0.786966	1.46592	0.344236	1.26948	0.117211	0.931032	1.66226	0.316683	1.24546	0.0252523	1.5977	-2.45312	0.310892	1.24047
5550	Selenom	0.173523	0.760643	1.42891	0.14369	1.10473	0.40829	0.389031	0.850739	0.0727731	1.05174	0.0252744	1.59732	-2.45269	0.14677	1.10709
2606	Tmed8	0.257298	0.589563	1.17761	0.157152	1.11508	0.0386132	1.41326	2.26689	0.248465	1.18794	0.0252928	1.597	-2.45233	0.185228	1.137
6415	Nup37	0.0925312	1.03371	1.79678	0.202875	1.15099	0.0502457	1.2989	2.12886	0.204927	1.15263	0.0252943	1.59698	-2.4523	0.159372	1.1168
63	Tanc2	0.658865	0.181204	0.450399	0.0812919	1.05796	0.0216074	1.6654	2.56359	0.211183	1.15764	0.0253147	1.59663	-2.45191	0.154177	1.11279
2680	Peg3	0.216461	0.66462	1.29037	0.141169	1.1028	0.0412203	1.38489	2.23288	0.229816	1.17269	0.0254252	1.59474	-2.44977	0.172356	1.1269
857	Ugcg	0.22058	0.656433	1.27827	0.953714	1.93685	0.19106	0.71883	1.3693	1.0181	2.02525	0.0254306	1.59464	-2.44966	1.22584	2.33892
5078	Pnpla8	0.321268	0.493133	1.02575	0.158274	1.11595	0.0751364	1.12415	1.91224	0.210228	1.15687	0.025478	1.59383	-2.44875	0.184067	1.13608
2115	Rpl19	0.353911	0.451106	0.956647	0.550565	1.46466	0.207681	0.682603	1.31677	0.600536	1.51628	0.0255568	1.59249	-2.44723	0.772865	1.70866
3845	Ccp110	0.276122	0.5589	1.13025	0.283901	1.21748	0.107846	0.967195	1.71009	0.298697	1.23003	0.0255675	1.59231	-2.44702	0.288654	1.2215
6655	Znf687	0.567735	0.245855	0.584252	0.118042	1.08526	0.040138	1.39644	2.24675	0.22454	1.1684	0.0256129	1.59154	-2.44615	0.178747	1.1319
2192	Anp32e	0.355908	0.448662	0.952568	0.18365	1.13575	0.0967376	1.0144	1.77179	0.245038	1.18512	0.0256198	1.59142	-2.44602	0.232066	1.17452
4206	Mfsd8	0.49933	0.301613	0.692295	0.344794	1.26997	0.399223	0.398785	0.867709	0.313216	1.24247	0.0256695	1.59058	-2.44507	0.667989	1.58886
6321	Ndufa6	0.0499784	1.30122	2.13168	0.394372	1.31437	0.0549634	1.25993	2.08119	0.746874	1.67815	0.025717	1.58978	-2.44416	0.59795	1.51356
3718	Nup188	0.446181	0.350489	0.782356	0.134057	1.09737	0.0709786	1.14887	1.94337	0.204361	1.15218	0.0257246	1.58965	-2.44401	0.180369	1.13317
3339	Wapl	0.56885	0.245002	0.582551	0.156514	1.11459	0.266509	0.574288	1.15412	0.146877	1.10717	0.0257395	1.5894	-2.44373	0.23104	1.17368
3719	Mlec	0.285397	0.544551	1.1078	0.10189	1.07318	0.0817273	1.08763	1.86594	0.170963	1.12581	0.0257502	1.58922	-2.44352	0.15186	1.111
7339	Epb41l4b	0.261938	0.581802	1.1657	0.281694	1.21562	0.0268872	1.57045	2.45291	0.488389	1.40288	0.0258727	1.58716	-2.44119	0.340129	1.26587
6789	U2af1	0.103049	0.986954	1.73602	0.358742	1.28231	0.0161734	1.7912	2.70872	0.453449	1.36931	0.0259062	1.5866	-2.44055	0.288428	1.22131
4117	Actbl2	0.233767	0.631216	1.24071	0.205114	1.15278	0.0438094	1.35843	2.20103	0.313046	1.24233	0.0259148	1.58645	-2.44039	0.237338	1.17882
3584	Armh3	0.19591	0.707943	1.3536	0.142229	1.10361	0.0222995	1.65171	2.5477	0.264512	1.20123	0.0259187	1.58639	-2.44031	0.17722	1.1307
7792	Fkbp9	0.092412	1.03427	1.79751	0.327785	1.25509	0.0455819	1.34121	2.18022	0.299786	1.23096	0.0259672	1.58558	-2.4394	0.22726	1.17061
7329	Reep6	0.109754	0.95958	1.70006	0.176059	1.12979	0.040636	1.39109	2.24032	0.201888	1.1502	0.025992	1.58516	-2.43892	0.149296	1.10903
6424	Yif1b	0.403927	0.393698	0.858874	0.133488	1.09694	0.0911466	1.04026	1.80523	0.218239	1.16331	0.0260169	1.58474	-2.43845	0.204259	1.15209
3630	Slc6a7	0.200655	0.69755	1.33854	0.156727	1.11476	0.0207569	1.68284	2.58381	0.299641	1.23084	0.0260243	1.58462	-2.43831	0.198576	1.14757
2143	Frg1	0.168841	0.772523	1.44566	0.385171	1.30601	0.0541804	1.26616	2.08884	0.458461	1.37408	0.0260497	1.5842	-2.43783	0.360806	1.28414
6200	Atg3	0.203098	0.692294	1.3309	0.124026	1.08977	0.0452105	1.34476	2.18452	0.250103	1.18929	0.0260519	1.58416	-2.43779	0.189912	1.14069
1958	Pcp4	0.357099	0.447212	0.950143	0.185541	1.13724	0.0262175	1.58141	2.46574	0.37762	1.2992	0.026052	1.58416	-2.43779	0.265703	1.20222
3711	Larp1	0.573635	0.241364	0.575273	0.0835743	1.05964	0.0301883	1.52016	2.3938	0.220033	1.16476	0.0261063	1.58325	-2.43677	0.165476	1.12154
3568	Gapvd1	0.275579	0.559753	1.13158	0.134862	1.09799	0.022937	1.63946	2.53347	0.241945	1.18259	0.0261682	1.58223	-2.4356	0.164287	1.12061
4546	Csnk1g2	0.0989705	1.00449	1.7589	0.317639	1.24629	0.0509348	1.29299	2.12164	0.353243	1.27743	0.0262092	1.58155	-2.43483	0.273638	1.20885
5655	Epn3	0.171271	0.766316	1.43692	0.178914	1.13203	0.136092	0.866167	1.57507	0.175937	1.1297	0.0262225	1.58133	-2.43458	0.180981	1.13365
209	Bltp3a	0.29995	0.522951	1.07365	0.179951	1.13285	0.010786	1.96714	2.90945	0.323708	1.25154	0.0262499	1.58087	-2.43407	0.199525	1.14832
7374	Ccnt1	0.385974	0.413442	0.892973	0.427207	1.34463	0.242315	0.615621	1.21725	0.478739	1.39353	0.0262871	1.58026	-2.43337	0.671138	1.59233
2572	Zyg11b	0.209388	0.679049	1.31157	0.203353	1.15137	0.0523942	1.28072	2.10666	0.300903	1.23191	0.0263531	1.57917	-2.43213	0.235466	1.17729
7021	Senp3	0.6371	0.195792	0.481514	0.0952137	1.06822	0.0114347	1.94177	2.88064	0.325902	1.25345	0.0264134	1.57818	-2.43101	0.214905	1.16063
4474	Pbrm1	0.535769	0.271023	0.633782	0.25886	1.19653	0.168028	0.774619	1.44861	0.36317	1.28625	0.0265048	1.57668	-2.42931	0.437057	1.35384
5536	Zng1	0.10726	0.969561	1.71321	0.147485	1.10764	0.0251433	1.59958	2.48698	0.237494	1.17894	0.0265309	1.57625	-2.42882	0.160601	1.11775
3911	Pja2	0.818233	0.0871229	0.233889	0.0581271	1.04111	0.213438	0.670729	1.29936	0.161549	1.11849	0.0265627	1.57573	-2.42823	0.238301	1.1796
273	KRT72	0.225728	0.646415	-1.26341	-1.13731	0.454605	0.00883246	2.05392	-3.00774	-2.858	0.137929	0.0265651	1.57569	2.42819	-1.70071	0.307636
3542	Sepsecs	0.203393	0.691664	1.32999	0.151089	1.11041	0.383145	0.416636	0.898442	0.0862356	1.0616	0.0266293	1.57464	-2.427	0.162195	1.11899
4276	Comtd1	0.979038	0.00920062	0.0267171	0.092509	1.06622	0.0754473	1.12236	1.90998	0.325657	1.25324	0.0266729	1.57393	-2.42619	0.334072	1.26057
6115	Gigyf1	0.247444	0.606524	1.20347	0.188158	1.13931	0.0199534	1.69998	2.60365	0.364315	1.28727	0.0266829	1.57377	-2.42601	0.240404	1.18132
7469	Actr10	0.481458	0.317442	0.721902	0.0789836	1.05627	0.012508	1.90281	2.83631	0.205066	1.15274	0.0266954	1.57356	-2.42578	0.132314	1.09605
1776	Lman2l	0.320968	0.493538	1.02641	0.121817	1.0881	0.0635535	1.19686	2.00332	0.172393	1.12693	0.0266988	1.57351	-2.42571	0.143125	1.10429
1771	Zdhhc9	0.0295771	1.52904	2.40427	0.587157	1.50228	0.0440021	1.35653	2.19873	0.485959	1.40052	0.0267059	1.57339	-2.42558	0.374077	1.29601
6532	Tomm40l	0.196941	0.705664	1.3503	0.212841	1.15897	0.0476432	1.322	2.15695	0.280151	1.21432	0.0267533	1.57262	-2.42471	0.213828	1.15976
3325	Sdc3	0.590311	0.228919	0.550157	0.0927968	1.06644	0.0245613	1.60975	2.49885	0.315471	1.24442	0.0267608	1.5725	-2.42457	0.228645	1.17173
3908	Clasp1	0.589959	0.229178	0.550684	0.0897365	1.06418	0.071006	1.1487	1.94316	0.17565	1.12947	0.0267627	1.57247	-2.42454	0.158722	1.1163
7319	Txnrd2	0.215361	0.666832	1.29362	0.160735	1.11786	0.0262859	1.58028	2.46441	0.224665	1.16851	0.0268999	1.57025	-2.42202	0.153754	1.11246
4668	Dzank1	0.735566	0.133378	0.344075	0.069827	1.04959	0.0329013	1.48279	2.34964	0.293827	1.22589	0.0269405	1.56959	-2.42127	0.231233	1.17384
34	Ighg3	0.046133	1.33599	2.1739	3.2218	9.3295	0.0431213	1.36531	2.20932	3.22109	9.32493	0.0269635	1.56922	-2.42085	2.4307	5.39154
3473	Pptc7	0.284429	0.546026	1.11012	0.277542	1.21213	0.072103	1.14205	1.9348	0.36467	1.28759	0.0269926	1.56876	-2.42032	0.309924	1.23964
3619	Dlgap3	0.960035	0.0177128	0.0509531	0.0322492	1.02261	0.115651	0.936852	1.66999	0.201179	1.14964	0.0270142	1.56841	-2.41992	0.234911	1.17683
5131	Shtn1	0.170838	0.767417	1.43847	0.172412	1.12694	0.0257477	1.58926	2.47492	0.234188	1.17624	0.0270483	1.56786	-2.4193	0.158827	1.11638
4820	Eloa	0.399465	0.398521	0.867253	0.295397	1.22722	0.119845	0.92138	1.6494	0.406054	1.32506	0.0270695	1.56752	-2.41892	0.411197	1.32979
3685	Slc44a1	0.0643879	1.1912	1.99627	0.475449	1.39035	0.100027	0.999884	1.7529	0.403935	1.32311	0.0270976	1.56707	-2.4184	0.374209	1.29613
7675	Timm10b	0.139885	0.854228	1.55882	0.274404	1.20949	0.0221255	1.65511	2.55165	0.374299	1.29621	0.0270992	1.56704	-2.41837	0.247299	1.18698
283	Ccnyl1	0.228406	0.641293	1.25578	0.3757	1.29747	0.0806697	1.09329	1.87314	0.478556	1.39335	0.0271514	1.56621	-2.41742	0.415211	1.33349
5887	Far1	0.111576	0.95243	1.69063	0.184009	1.13604	0.0847155	1.07204	1.84603	0.18583	1.13747	0.0271931	1.56554	-2.41667	0.162269	1.11905
6004	Ufsp2	0.247853	0.605807	1.20238	0.112143	1.08083	0.0843584	1.07387	1.84838	0.154323	1.1129	0.0272066	1.56533	-2.41642	0.135888	1.09877
5500	Mtmr6	0.20837	0.681164	1.31466	0.0928419	1.06647	0.0181172	1.74191	2.65204	0.159648	1.11701	0.027217	1.56516	-2.41623	0.103008	1.07401
4135	Poldip3	0.13859	0.858268	1.56432	0.231787	1.17429	0.0116506	1.93365	2.87141	0.327937	1.25522	0.0272387	1.56481	-2.41584	0.198587	1.14757
3756	Eeig1	0.234413	0.630019	1.23892	0.147347	1.10753	0.0689538	1.16144	1.95914	0.242494	1.18304	0.0272786	1.56418	-2.41512	0.201781	1.15012
5323	Rab11fip5	0.478263	0.320334	0.727264	0.150319	1.10981	0.0444441	1.35219	2.19349	0.253617	1.19219	0.0273086	1.5637	-2.41458	0.199249	1.1481
821	Papss2	0.61472	0.211322	0.51403	0.062483	1.04426	0.0285549	1.54432	2.42224	0.18447	1.1364	0.0273199	1.56352	-2.41437	0.137186	1.09976
2497	Mphosph8	0.590924	0.228468	0.54924	0.114829	1.08285	0.0255801	1.5921	2.47824	0.262707	1.19973	0.0273718	1.5627	-2.41344	0.190718	1.14133
7686	Mapk8ip1	0.522614	0.281819	0.654636	0.0768704	1.05473	0.107513	0.968537	1.71186	0.133207	1.09673	0.0274599	1.5613	-2.41185	0.13316	1.09669
5362	Abca3	0.367012	0.43532	0.93017	0.167829	1.12337	0.0559574	1.25214	2.07163	0.237927	1.1793	0.0274766	1.56104	-2.41155	0.192059	1.14239
6664	Urm1	0.373892	0.427254	0.916527	0.206161	1.15361	0.0298461	1.52511	2.39964	0.495782	1.41008	0.0275481	1.55991	-2.41027	0.353483	1.27764
304	Pigg	0.300005	0.522872	1.07352	0.256936	1.19494	0.0588517	1.23024	2.04466	0.372792	1.29486	0.0276097	1.55894	-2.40916	0.300611	1.23167
5002	Cdc73	0.202905	0.692708	1.33151	0.290925	1.22342	0.190207	0.720773	1.37209	0.311417	1.24093	0.02765	1.5583	-2.40844	0.366141	1.2889
5375	Neto1	0.0547114	1.26192	2.08364	0.234289	1.17633	0.397027	0.40118	0.871857	0.0880449	1.06293	0.0276659	1.55806	-2.40816	0.170247	1.12525
7533	Sec11a	0.210045	0.677688	1.30957	0.256902	1.19491	0.112931	0.947186	1.68369	0.28953	1.22224	0.0277294	1.55706	-2.40703	0.276453	1.21121
6588	Ift27	0.320851	0.493697	1.02666	0.148133	1.10813	0.384031	0.415634	0.896727	0.113274	1.08168	0.0277868	1.55616	-2.40601	0.21616	1.16164
6223	Dut	0.156904	0.804366	1.49018	0.449942	1.36599	0.141454	0.849385	1.5522	0.460186	1.37572	0.0277962	1.55602	-2.40584	0.474094	1.38905
5084	Unc5a	0.554188	0.256343	0.605053	0.0723104	1.0514	0.117579	0.929672	1.66045	0.14061	1.10237	0.0278382	1.55536	-2.40509	0.145535	1.10614
325	Prr36	0.432095	0.364421	0.807326	0.154655	1.11316	0.0174026	1.75938	2.67216	0.348721	1.27343	0.0278617	1.55499	-2.40467	0.230706	1.17341
1867	Timm13	0.187074	0.727987	1.38244	0.335186	1.26154	0.0330727	1.48053	2.34697	0.468977	1.38413	0.0279414	1.55375	-2.40326	0.330347	1.25732
5902	Prmt7	0.534308	0.272208	0.636083	0.0799051	1.05695	0.105834	0.975377	1.72085	0.170498	1.12545	0.0279447	1.5537	-2.40321	0.169258	1.12448
4533	Tmem222	0.363033	0.440054	0.938142	0.115749	1.08354	0.0795063	1.0996	1.88115	0.256612	1.19467	0.0279615	1.55344	-2.40291	0.225249	1.16898
2435	Iqsec3	0.582938	0.234378	0.561216	0.0783972	1.05584	0.151985	0.818198	1.50934	0.117788	1.08507	0.027981	1.55314	-2.40256	0.135347	1.09836
1056	H2bc15	0.578438	0.237743	0.568001	0.205547	1.15312	0.0753656	1.12283	1.91057	0.327209	1.25458	0.0280539	1.55201	-2.40128	0.296118	1.22784
4678	Taf5	0.0106511	1.97261	-2.91565	-2.82553	0.141069	0.676303	0.169858	-0.425795	-0.423605	0.745559	0.0280666	1.55181	2.40105	-1.8978	0.268352
6265	Tmem147	0.0524141	1.28055	2.10646	1.50688	2.84196	0.0433481	1.36303	2.20657	1.54201	2.91199	0.0280699	1.55176	-2.401	1.15311	2.22393
498	Pten	0.151864	0.818544	1.50982	0.139567	1.10157	0.0254643	1.59407	2.48054	0.237373	1.17884	0.0281146	1.55107	-2.40021	0.159359	1.11679
7645	Preb	0.814941	0.0888736	0.23821	0.0780783	1.05561	0.0908464	1.04169	1.80708	0.196323	1.14577	0.0281363	1.55073	-2.39983	0.199378	1.1482
5520	Ccdc115	0.0953954	1.02047	1.77966	0.249141	1.1885	0.0362412	1.4408	2.29976	0.270197	1.20597	0.0281596	1.55037	-2.39942	0.192863	1.14303
7219	Ralb	0.40257	0.395159	0.861416	0.076063	1.05414	0.064339	1.19153	1.99668	0.114865	1.08287	0.0281656	1.55028	-2.39931	0.0959741	1.06879
3306	Bcl2l1	0.272105	0.565264	1.14014	0.397848	1.31754	0.21394	0.669709	1.29786	0.372378	1.29448	0.0281835	1.55	-2.399	0.467019	1.38225
632	Stag2	0.23865	0.622238	1.22723	0.256798	1.19482	0.188495	0.7247	1.37773	0.191582	1.14202	0.0281932	1.54986	-2.39883	0.224341	1.16824
549	Hdac1	0.471407	0.326604	0.738842	0.0911405	1.06521	0.0123292	1.90906	2.84343	0.224803	1.16862	0.0282239	1.54938	-2.39829	0.142885	1.10411
7809	Mecp2	0.200049	0.698864	1.34045	0.393592	1.31366	0.057419	1.24094	2.05786	0.433834	1.35082	0.0283114	1.54804	-2.39676	0.341375	1.26696
6976	Stard3nl	0.268454	0.571129	1.14924	0.420668	1.33855	0.290522	0.536821	1.09563	0.427874	1.34525	0.0283265	1.54781	-2.3965	0.643263	1.56186
5156	Hscb	0.404301	0.393295	0.858174	0.0749441	1.05332	0.0689682	1.16135	1.95902	0.135216	1.09826	0.0283407	1.54759	-2.39625	0.114846	1.08286
1508	Cnr1	0.200512	0.697859	1.33899	0.193955	1.1439	0.0349589	1.45644	2.31838	0.31467	1.24373	0.0283478	1.54748	-2.39612	0.22357	1.16762
1380	Rab3d	0.313022	0.504425	1.04399	0.112664	1.08122	0.277754	0.55634	1.12626	0.113848	1.08211	0.0283989	1.5467	-2.39523	0.167419	1.12305
2412	Emc10	0.172347	0.763595	1.43308	0.416509	1.33469	0.142798	0.845278	1.54659	0.363356	1.28642	0.0284071	1.54657	-2.39509	0.374313	1.29622
2123	Npy2r	0.412883	0.384173	0.842237	0.255042	1.19337	0.167182	0.776811	1.45169	0.45252	1.36843	0.0284709	1.5456	-2.39398	0.517374	1.43135
7800	Dgat1	0.372275	0.429137	0.919718	0.274192	1.20932	0.871827	0.0595699	-0.164122	-0.034627	0.976284	0.0284931	1.54526	-2.39359	0.474047	1.389
4921	Sugp1	0.359544	0.444248	0.945182	0.232271	1.17468	0.509413	0.29293	0.675866	0.138484	1.10075	0.0285547	1.54432	-2.39253	0.363597	1.28663
4382	Grik4	0.113467	0.94513	1.68097	0.738823	1.66881	0.0705969	1.15121	1.94631	0.799317	1.74028	0.0285681	1.54412	-2.39229	0.658077	1.57798
5557	Mark1	0.542862	0.26531	0.622655	0.109075	1.07854	0.0289511	1.53834	2.4152	0.239851	1.18087	0.0285728	1.54405	-2.39221	0.174319	1.12843
1738	Mrps21	0.376532	0.424198	0.911335	0.125471	1.09086	0.0433956	1.36255	2.206	0.233309	1.17553	0.0286146	1.54341	-2.39149	0.177023	1.13055
3896	Zdhhc17	0.133798	0.87355	1.58509	0.448355	1.36448	0.0528418	1.27702	2.10214	0.474039	1.38899	0.0286361	1.54309	-2.39112	0.363809	1.28682
4800	Tsr2	0.213068	0.671482	1.30047	0.121918	1.08818	0.118687	0.925597	1.65502	0.152311	1.11135	0.0287175	1.54185	-2.38971	0.146851	1.10715
7211	Ddx21	0.194782	0.710452	1.35722	0.310939	1.24051	0.0860186	1.06541	1.83755	0.29794	1.22939	0.0287497	1.54137	-2.38916	0.259124	1.19675
1099	Dnmt1	0.385997	0.413416	0.892929	0.192386	1.14265	0.0434279	1.36223	2.20561	0.276664	1.21139	0.0288567	1.53975	-2.38732	0.209925	1.15663
5342	Tcf25	0.298641	0.52485	1.07667	0.148351	1.1083	0.0548384	1.26092	2.08241	0.242371	1.18294	0.0289986	1.53762	-2.38489	0.190268	1.14098
4952	Slain2	0.097393	1.01147	1.76798	0.197828	1.14697	0.114175	0.94243	1.67739	0.171857	1.12651	0.0290029	1.53756	-2.38482	0.16278	1.11944
124	Fmnl2	0.203859	0.690671	1.32854	0.15057	1.11001	0.0846225	1.07251	1.84664	0.173303	1.12764	0.0290693	1.53657	-2.38368	0.149815	1.10943
1141	Srp14	0.0388845	1.41022	2.26325	0.255202	1.1935	0.197275	0.704928	1.34924	0.132726	1.09636	0.0292051	1.53454	-2.38137	0.160609	1.11776
274	POSTN	0.213276	0.671059	1.29984	0.247534	1.18718	0.0267535	1.57262	2.45545	0.399527	1.31908	0.0292792	1.53344	-2.38012	0.269783	1.20563
1725	Pcbp3	0.457559	0.339553	0.762545	0.118024	1.08525	0.0731253	1.13593	1.9271	0.151532	1.11075	0.0293622	1.53221	-2.37871	0.130993	1.09505
800	Diaph2	0.881145	0.0549525	0.152087	0.0811709	1.05788	0.104722	0.979961	1.72686	0.223254	1.16736	0.0293728	1.53205	-2.37854	0.239062	1.18023
3698	Smpd4	0.351533	0.454033	0.961524	0.1658	1.12179	0.019234	1.71593	2.62208	0.330966	1.25786	0.0293906	1.53179	-2.37824	0.216628	1.16201
3058	Ctcf	0.254192	0.594838	1.18568	0.479047	1.39382	0.0619806	1.20774	2.01683	0.619108	1.53593	0.0294297	1.53121	-2.37758	0.495274	1.40959
2122	Cdh8	0.461195	0.336115	0.756279	0.201168	1.14963	0.0259229	1.58632	2.47148	0.465844	1.38113	0.0294579	1.5308	-2.3771	0.324979	1.25265
544	Atox1	0.37923	0.421098	0.906058	0.11928	1.08619	0.382369	0.417517	0.899948	0.0785443	1.05595	0.0294582	1.53079	-2.3771	0.148815	1.10866
3476	Lpcat4	0.351303	0.454318	0.961999	0.147596	1.10772	0.085709	1.06697	1.83955	0.208595	1.15556	0.029558	1.52933	-2.37542	0.184263	1.13624
45	Neb	0.0240581	1.61874	2.50934	0.334257	1.26073	0.222648	0.652381	1.27227	0.150278	1.10978	0.0296821	1.52751	-2.37334	0.196825	1.14617
1171	Pcna	0.209836	0.678119	1.3102	0.122959	1.08897	0.00378686	2.42172	3.42151	0.25091	1.18996	0.0297809	1.52606	-2.37169	0.13507	1.09815
7857	Slc8a3	0.132988	0.876187	1.58866	0.283021	1.21674	0.0796313	1.09892	1.88029	0.33441	1.26086	0.0297972	1.52582	-2.37142	0.281775	1.21569
5406	Slc6a8	0.367887	0.434285	0.928424	0.0939607	1.0673	0.019119	1.71854	2.62509	0.195546	1.14516	0.0298045	1.52572	-2.3713	0.127861	1.09267
2866	Smg7	0.386288	0.413088	0.892367	0.143004	1.1042	0.126635	0.897447	1.61735	0.20014	1.14881	0.0298279	1.52538	-2.37091	0.201329	1.14976
1679	Aqp4	0.18422	0.734662	1.39199	0.303096	1.23379	0.0874032	1.05847	1.82866	0.332485	1.25918	0.029836	1.52526	-2.37078	0.288024	1.22097
5343	Slco3a1	0.195491	0.708874	1.35495	0.254167	1.19265	0.205234	0.68775	1.32428	0.208587	1.15556	0.0298465	1.52511	-2.3706	0.249893	1.18912
569	Atn1	0.0145237	1.83792	2.76225	0.597103	1.51268	0.282863	0.548423	1.11388	0.224393	1.16829	0.0298488	1.52507	-2.37056	0.346834	1.27177
3073	Dyrk1a	0.303944	0.517206	1.06449	0.123826	1.08962	0.00994991	2.00218	2.94918	0.263424	1.20032	0.0299079	1.52421	-2.36958	0.157094	1.11504
3793	Cpeb4	0.162417	0.789368	1.46928	0.231454	1.17402	0.0724235	1.14012	1.93237	0.266609	1.20298	0.0299339	1.52384	-2.36915	0.218974	1.16391
7050	Elovl4	0.105449	0.976959	1.72292	2.06667	4.18917	0.0743701	1.1286	1.91786	1.95375	3.87379	0.0299585	1.52348	-2.36874	1.61683	3.067
4646	Lrrtm3	0.573431	0.241519	0.575583	0.146684	1.10702	0.0748445	1.12584	1.91438	0.379148	1.30057	0.0301227	1.52111	-2.36603	0.336014	1.26226
5594	Znrf1	0.325986	0.486801	1.01546	0.180575	1.13334	0.0752668	1.1234	1.91129	0.242483	1.18303	0.0301477	1.52075	-2.36562	0.204859	1.15257
1697	Acyp1	0.234133	0.630538	1.2397	0.142842	1.10408	0.102927	0.987472	1.73669	0.162713	1.11939	0.0301922	1.52011	-2.36488	0.148427	1.10836
4591	Engase	0.140622	0.851947	1.5557	0.224142	1.16808	0.026549	1.57595	2.45935	0.291059	1.22354	0.0301982	1.52002	-2.36479	0.194086	1.144
3180	Cep131	0.48882	0.310851	0.709628	0.171615	1.12632	0.106168	0.974007	1.71905	0.281964	1.21585	0.0302124	1.51981	-2.36455	0.271862	1.20737
4796	Uba3	0.181576	0.740942	1.40096	0.241104	1.1819	0.0224699	1.6484	2.54386	0.385292	1.30612	0.0302572	1.51917	-2.36382	0.250823	1.18989
2996	Slc6a4	0.144023	0.841567	1.54151	0.13702	1.09963	0.252438	0.597845	1.19027	0.117596	1.08493	0.0302976	1.51859	-2.36315	0.156695	1.11473
6243	Trappc5	0.70807	0.149924	0.381654	0.0724585	1.05151	0.0279304	1.55392	2.43352	0.205931	1.15343	0.0303122	1.51838	-2.36291	0.151936	1.11106
417	R3hdm1	0.19282	0.714848	1.36357	0.29993	1.23108	0.0594678	1.22572	2.03907	0.453852	1.36969	0.0303152	1.51834	-2.36287	0.35493	1.27892
1547	Pcnt	0.505731	0.296081	0.681843	0.17368	1.12793	0.0686604	1.16329	1.96145	0.481112	1.39582	0.0303168	1.51832	-2.36284	0.410091	1.32877
5348	Cluap1	0.362254	0.440987	0.93971	0.128323	1.09302	0.303798	0.517415	1.06482	0.109581	1.07892	0.0303177	1.5183	-2.36282	0.170124	1.12516
3558	Mtss2	0.365949	0.43658	0.932295	0.106388	1.07653	0.0237539	1.62427	2.51578	0.212274	1.15851	0.0303398	1.51799	-2.36246	0.142755	1.10401
6293	Nop10	0.581297	0.235602	0.563688	0.11274	1.08128	0.37391	0.427233	0.916491	0.114949	1.08294	0.030359	1.51771	-2.36215	0.223235	1.16735
2366	St3gal2	0.35749	0.446736	0.949348	0.234155	1.17622	0.209722	0.678356	1.31055	0.195246	1.14492	0.0303632	1.51765	-2.36208	0.241695	1.18238
604	Pld3	0.678692	0.168327	0.422446	0.0783397	1.0558	0.0393239	1.40534	2.25741	0.215934	1.16146	0.0304531	1.51637	-2.36061	0.168394	1.12381
4701	Ppp4r4	0.455889	0.341141	0.765434	0.0993364	1.07128	0.0416583	1.3803	2.22736	0.18479	1.13665	0.0305032	1.51565	-2.35979	0.139141	1.10125
434	Lonrf2	0.435767	0.360746	0.800767	0.102983	1.07399	0.269778	0.568994	1.14593	0.138876	1.10105	0.0305519	1.51496	-2.359	0.201846	1.15017
4779	Fam110b	0.699768	0.155046	0.393112	0.0642362	1.04553	0.0406841	1.39058	2.23971	0.198692	1.14766	0.0305521	1.51496	-2.359	0.156626	1.11468
6128	Raf1	0.103443	0.985298	1.73385	0.258893	1.19656	0.05854	1.23255	2.0475	0.313754	1.24294	0.0305877	1.51445	-2.35842	0.243754	1.18407
4818	Gramd4	0.246303	0.60853	1.20652	0.248545	1.18801	0.0554148	1.25637	2.07683	0.289891	1.22255	0.0306299	1.51386	-2.35773	0.22386	1.16785
446	Srp72	0.117826	0.928759	1.65923	0.208585	1.15555	0.0310073	1.50854	2.38009	0.239712	1.18076	0.0306765	1.51319	-2.35698	0.163594	1.12007
2484	Tmem63b	0.399662	0.398307	0.866881	0.133624	1.09705	0.0481339	1.31755	2.15154	0.259115	1.19674	0.0306865	1.51305	-2.35682	0.198645	1.14762
4008	Atg2b	0.600506	0.221483	0.534979	0.0857069	1.06121	0.124745	0.903975	1.62611	0.150639	1.11006	0.0306873	1.51304	-2.3568	0.156918	1.1149
4650	Dnm3	0.223997	0.649757	1.26837	0.145411	1.10605	0.0350126	1.45578	2.31758	0.240765	1.18162	0.0307153	1.51264	-2.35635	0.168893	1.1242
1064	Gpx1	0.246475	0.608226	1.20606	0.302929	1.23365	0.127246	0.895354	1.61453	0.355333	1.27928	0.0307908	1.51158	-2.35513	0.347134	1.27203
281	Btbd8	0.410704	0.386471	0.846262	0.125622	1.09098	0.0342245	1.46566	2.32933	0.221587	1.16602	0.0308163	1.51122	-2.35472	0.159071	1.11657
1875	Rps15a	0.434054	0.362456	0.803822	0.102492	1.07363	0.154508	0.811048	1.49945	0.145561	1.10616	0.0308507	1.51074	-2.35416	0.158345	1.11601
3045	Sdf4	0.598997	0.222575	0.537216	0.0911355	1.06521	0.199433	0.700203	1.34239	0.108489	1.0781	0.0309212	1.50974	-2.35303	0.13782	1.10024
4948	Rftn2	0.609759	0.214842	0.521314	0.0777741	1.05539	0.0490478	1.30938	2.14161	0.193698	1.14369	0.0309392	1.50949	-2.35274	0.155159	1.11354
7052	Prcc	0.375293	0.42563	0.913768	0.156252	1.11439	0.178044	0.749473	1.41309	0.15979	1.11712	0.0309456	1.5094	-2.35263	0.182473	1.13483
7122	Arhgef7	0.659262	0.180942	0.449834	0.0788504	1.05618	0.0262893	1.58022	2.46435	0.202108	1.15038	0.0310392	1.50809	-2.35113	0.145235	1.10591
3687	Dstyk	0.430407	0.36612	0.810352	0.0969215	1.06949	0.0426112	1.37048	2.21554	0.212191	1.15845	0.0310674	1.50769	-2.35068	0.159086	1.11658
7829	Actl6a	0.110561	0.956398	1.69587	0.315731	1.24464	0.0513285	1.28964	2.11756	0.342442	1.2679	0.0311589	1.50642	-2.34922	0.257207	1.19516
3317	Gapdhs	0.333947	0.476323	0.998343	0.303382	1.23403	0.286729	0.542529	1.10462	0.261134	1.19842	0.0312008	1.50583	-2.34855	0.384053	1.305
5335	Ppp1r8	0.156101	0.806594	1.49327	0.471695	1.38674	0.0925299	1.03372	1.79679	0.531186	1.44512	0.0312285	1.50545	-2.34811	0.462813	1.37823
5097	Nat10	0.44143	0.355138	0.790721	0.218346	1.1634	0.0451356	1.34548	2.18539	0.339663	1.26546	0.0312582	1.50504	-2.34763	0.257814	1.19567
2947	Kcnh1	0.134995	0.869683	1.57985	0.220874	1.16544	0.0463703	1.33376	2.17121	0.278675	1.21308	0.0312691	1.50489	-2.34746	0.204529	1.15231
5094	Pacs1	0.416345	0.380547	0.835871	0.148836	1.10867	0.0556891	1.25423	2.0742	0.225691	1.16934	0.0314099	1.50293	-2.34522	0.178248	1.13151
7643	Tbk1	0.27857	0.555066	1.12427	0.106067	1.07629	0.109694	0.959816	1.70037	0.152772	1.1117	0.031415	1.50286	-2.34514	0.141831	1.1033
495	Gtpbp1	0.783349	0.106045	0.279937	0.0586142	1.04146	0.0333298	1.47717	2.34298	0.206626	1.15399	0.0314387	1.50253	-2.34477	0.15861	1.11621
826	Kcnk4	0.353924	0.451091	0.956621	0.764811	1.69915	0.299679	0.523344	1.07427	0.881867	1.84276	0.0314513	1.50236	-2.34457	1.33963	2.53086
5158	Fbxo45	0.532716	0.273504	0.638596	0.140677	1.10242	0.0531994	1.27409	2.09856	0.272899	1.20823	0.0315	1.50169	-2.3438	0.218031	1.16315
608	Dhodh	0.510724	0.291813	0.673742	0.0920339	1.06587	0.278149	0.555723	1.12529	0.102693	1.07378	0.0315524	1.50097	-2.34297	0.153634	1.11237
6494	Dph7	0.022052	1.65655	2.55333	1.31283	2.48428	0.0310121	1.50847	2.38001	1.17427	2.25678	0.03156	1.50086	-2.34285	0.829834	1.77748
4450	Yipf6	0.144961	0.838748	1.53764	0.481604	1.3963	0.0658182	1.18165	1.98439	0.603714	1.51962	0.0315855	1.50051	-2.34245	0.478662	1.39345
2158	Fhl1	0.157004	0.804089	1.48979	0.1047	1.07527	0.0359078	1.44481	2.30454	0.15745	1.11531	0.0315921	1.50042	-2.34234	0.109761	1.07905
2703	Ttbk2	0.139261	0.85617	1.56147	1.46103	2.75306	0.143912	0.841902	1.54196	1.33886	2.52951	0.0316072	1.50021	-2.34211	1.3508	2.55054
975	Enpp1	0.0279039	1.55434	2.434	0.349928	1.2745	0.0306994	1.51287	2.3852	0.299822	1.23099	0.0316149	1.50011	-2.34198	0.209594	1.15636
6110	Dipk1b	0.0787378	1.10382	-1.88651	-1.4854	0.35715	0.112986	0.946976	-1.68341	-1.33143	0.397375	0.031684	1.49916	2.3409	-1.23982	0.423425
3328	H2ac20	0.414897	0.38206	0.838529	0.288721	1.22156	0.0766481	1.1155	1.90131	0.418219	1.33628	0.0317008	1.49893	-2.34063	0.356555	1.28037
806	Ttc3	0.636907	0.195924	0.481792	0.117842	1.08511	0.102483	0.989348	1.73915	0.218545	1.16356	0.0317534	1.49821	-2.33981	0.212725	1.15888
3463	Dgkb	0.283977	0.546717	1.1112	0.0959945	1.0688	0.0503209	1.29825	2.12806	0.174534	1.1286	0.0317768	1.49789	-2.33944	0.131596	1.09551
5011	Slc4a8	0.544173	0.264263	0.620607	0.102322	1.0735	0.0257658	1.58896	2.47457	0.21385	1.15978	0.0317787	1.49786	-2.33941	0.148869	1.1087
787	Sfn	0.0821355	1.08547	1.86318	0.27353	1.20876	0.0805509	1.09393	1.87395	0.211612	1.15798	0.0318186	1.49732	-2.33878	0.177551	1.13096
5569	Baalc	0.203088	0.692315	1.33093	0.274252	1.20937	0.0691855	1.15999	1.95731	0.32896	1.25611	0.0318227	1.49726	-2.33872	0.264492	1.20121
395	Plekha5	0.730213	0.136551	0.35135	0.0667793	1.04738	0.0320083	1.49474	2.36378	0.249164	1.18852	0.0318513	1.49687	-2.33827	0.186949	1.13835
7258	Tuba8	0.0736115	1.13305	1.92348	0.152192	1.11126	0.379314	0.421002	0.905894	0.0652966	1.0463	0.0318554	1.49682	-2.33821	0.116379	1.08401
5814	Dst	0.350644	0.455134	0.963355	0.11692	1.08442	0.0396403	1.40186	2.25324	0.178963	1.13207	0.0319171	1.49598	-2.33724	0.129729	1.09409
3621	Tmeff1	0.393752	0.404777	0.878072	0.106022	1.07626	0.0245735	1.60953	2.4986	0.264572	1.20128	0.0319239	1.49588	-2.33714	0.177786	1.13115
3491	Eif4g1	0.64963	0.187334	0.463543	0.111616	1.08044	0.111722	0.95186	1.68987	0.172645	1.12712	0.0319939	1.49493	-2.33605	0.1731	1.12748
5938	Xpo6	0.119233	0.923603	1.65236	0.25632	1.19443	0.0123261	1.90917	2.84356	0.39694	1.31671	0.0320102	1.49471	-2.33579	0.235168	1.17704
815	Slc4a4	0.426292	0.370293	0.817764	0.117945	1.08519	0.0661871	1.17923	1.98136	0.211602	1.15797	0.0320337	1.49439	-2.33543	0.173648	1.12791
1619	Kpna2	0.853324	0.0688859	0.188094	0.0646838	1.04586	0.0277795	1.55628	2.43628	0.305359	1.23573	0.0320624	1.494	-2.33498	0.229467	1.1724
176	Herc3	0.548531	0.260799	0.61382	0.13912	1.10123	0.142872	0.845052	1.54628	0.262148	1.19926	0.0320977	1.49353	-2.33443	0.280484	1.2146
1039	Ndufb1	0.157734	0.802075	1.48699	0.772669	1.70843	0.0299559	1.52352	2.39776	1.18808	2.27849	0.0321065	1.49341	-2.33429	0.799682	1.74072
2146	Lig3	0.33523	0.474657	0.995611	0.160388	1.11759	0.289652	0.538124	1.09768	0.104733	1.0753	0.03227	1.4912	-2.33176	0.153714	1.11243
5311	Dolk	0.180729	0.742972	1.40385	0.607656	1.52378	0.096233	1.01668	1.77473	0.803269	1.74505	0.0322732	1.49116	-2.33171	0.704067	1.62909
328	Dchs1	0.798037	0.0979769	0.260478	0.0627925	1.04449	0.0122057	1.91344	2.84841	0.296263	1.22796	0.0322977	1.49083	-2.33133	0.194482	1.14431
2459	Uri1	0.351269	0.45436	0.962068	0.178083	1.13138	0.237602	0.62415	1.2301	0.182318	1.13471	0.032304	1.49074	-2.33124	0.237279	1.17877
7184	Ankh	0.210327	0.677104	1.30872	0.242353	1.18292	0.0707388	1.15034	1.94522	0.255537	1.19378	0.0323153	1.49059	-2.33106	0.206091	1.15356
6065	Pex6	0.919599	0.0364016	-0.102652	-0.0074509	0.994849	0.00321847	2.49235	3.50077	0.262601	1.19964	0.0324676	1.48855	-2.32872	0.159436	1.11685
5206	Gpt	0.124377	0.905261	1.62784	0.244715	1.18486	0.0345297	1.46181	2.32475	0.307075	1.2372	0.0324871	1.48829	-2.32842	0.211342	1.15776
4824	Rnf170	0.196758	0.706068	1.35089	0.232335	1.17473	0.0874311	1.05833	1.82848	0.398973	1.31857	0.0324942	1.48819	-2.32831	0.339886	1.26566
1346	Sstr2	0.452747	0.344145	0.770886	0.268245	1.20434	0.0266833	1.57376	2.45678	0.73174	1.66064	0.0325156	1.48791	-2.32798	0.501228	1.41542
6055	Elp5	0.535337	0.271372	0.634461	0.0913744	1.06538	0.0808429	1.09236	1.87195	0.168807	1.12413	0.0325421	1.48755	-2.32757	0.148625	1.10851
7526	Syt11	0.341102	0.467115	0.983201	0.151084	1.1104	0.0764774	1.11647	1.90254	0.212502	1.1587	0.0325624	1.48728	-2.32726	0.177644	1.13104
6903	Lman2	0.177244	0.751428	1.41586	0.203153	1.15121	0.0197492	1.70445	2.60882	0.291735	1.22411	0.0326041	1.48673	-2.32662	0.183718	1.13581
6235	Ndufa2	0.114382	0.941642	1.67635	0.289531	1.22224	0.863013	0.0639825	0.175527	0.0191863	1.01339	0.0326918	1.48556	-2.32528	0.196236	1.14571
2813	Jcad	0.823125	0.0845342	0.227476	0.0823467	1.05874	0.087379	1.05859	1.82881	0.244666	1.18482	0.0327104	1.48531	-2.325	0.235637	1.17743
4615	Tbcd	0.170488	0.768306	1.43973	0.188636	1.13969	0.0630906	1.20004	2.00726	0.213123	1.1592	0.0327294	1.48506	-2.32471	0.166195	1.12209
6628	Mcee	0.483027	0.316029	0.719277	0.105451	1.07583	0.0335077	1.47486	2.34024	0.259843	1.19735	0.0327788	1.48441	-2.32395	0.185698	1.13737
306	Ptrhd1	0.501057	0.300113	0.689468	0.0782801	1.05576	0.339599	0.469034	0.986364	0.0678985	1.04819	0.032783	1.48435	-2.32389	0.115881	1.08364
4876	Clasrp	0.0768165	1.11455	1.9001	2.79668	6.94839	0.0309843	1.50886	2.38047	3.3217	9.9984	0.0327907	1.48425	-2.32377	2.24947	4.75507
4346	Dop1a	0.660048	0.180424	0.448719	0.124998	1.09051	0.0945239	1.02446	1.78482	0.209887	1.1566	0.0328477	1.48349	-2.32291	0.198442	1.14746
2923	Repin1	0.120771	0.918038	1.64494	1.71146	3.27492	0.0552012	1.25805	2.07889	2.12821	4.37174	0.0329085	1.48269	-2.32198	1.60679	3.04574
3297	Myo6	0.200833	0.697165	1.33799	0.127081	1.09208	0.0242034	1.61612	2.50629	0.196712	1.14608	0.0330063	1.4814	-2.3205	0.127622	1.09249
144	Mocs3	0.325519	0.487424	1.01648	0.185978	1.13759	0.0861298	1.06485	1.83683	0.249903	1.18913	0.0330208	1.48121	-2.32028	0.214624	1.1604
2286	Top1	0.247892	0.605738	1.20228	0.173325	1.12765	0.00928178	2.03237	2.98336	0.302705	1.23345	0.0330422	1.48093	-2.31996	0.174493	1.12857
1194	Cox4i1	0.355082	0.449672	0.954253	0.142539	1.10385	0.023604	1.62701	2.51898	0.276245	1.21104	0.0330715	1.48055	-2.31951	0.182	1.13446
6503	Snf8	0.24322	0.614	1.2148	0.189534	1.1404	0.509782	0.292615	0.675267	0.0961623	1.06893	0.0330963	1.48022	-2.31914	0.235273	1.17713
7462	Nfu1	0.423711	0.37293	0.822435	0.138502	1.10076	0.0343161	1.4645	2.32795	0.268171	1.20428	0.0331015	1.48015	-2.31906	0.190049	1.1408
6131	Mrps5	0.412874	0.384183	0.842255	0.157164	1.11509	0.182942	0.737686	1.39631	0.217619	1.16281	0.0331058	1.4801	-2.319	0.249128	1.18849
4827	Tmem63c	0.411433	0.385701	0.844915	0.189962	1.14073	0.0775184	1.1106	1.8951	0.381596	1.30278	0.0331062	1.48009	-2.31899	0.322808	1.25076
3975	Ntaq1	0.640231	0.193663	0.477008	0.0882614	1.06309	0.0226547	1.64484	2.53972	0.246582	1.18639	0.0331202	1.47991	-2.31878	0.169759	1.12487
4407	Spata2l	0.511935	0.290785	0.671786	0.0825151	1.05886	0.301673	0.520464	1.06968	0.128983	1.09352	0.0331239	1.47986	-2.31872	0.201133	1.1496
7309	Selenok	0.34017	0.468304	0.985162	0.447439	1.36362	0.472861	0.325266	0.736377	0.339827	1.2656	0.0331644	1.47933	-2.31811	0.769785	1.70502
693	Gucy1b1	0.383881	0.415804	0.897018	0.161686	1.11859	0.0287901	1.54076	2.41805	0.3508	1.27527	0.0331754	1.47918	-2.31795	0.239467	1.18056
751	Dpm1	0.498757	0.302111	0.693235	0.108848	1.07837	0.0579069	1.23727	2.05333	0.211751	1.15809	0.0332164	1.47865	-2.31733	0.169168	1.12441
3856	Ube2q1	0.0442155	1.35443	2.19619	0.216196	1.16167	0.0074144	2.12992	3.09354	0.26896	1.20494	0.0332495	1.47822	-2.31683	0.151064	1.11039
7550	Mta2	0.509104	0.293194	0.676366	0.153815	1.11251	0.0597381	1.22375	2.03664	0.238049	1.1794	0.0332731	1.47791	-2.31648	0.191877	1.14225
2566	Hgsnat	0.41753	0.379312	0.833697	0.253825	1.19236	0.156966	0.804196	1.48994	0.349868	1.27444	0.0333626	1.47674	-2.31513	0.374148	1.29607
3870	Prpf38b	0.330391	0.480972	1.00595	0.284777	1.21822	0.0672522	1.17229	1.97271	0.355507	1.27943	0.0333731	1.4766	-2.31498	0.28548	1.21882
247	Osbpl8	0.510455	0.292042	0.674178	0.0819681	1.05846	0.0153178	1.8148	2.73579	0.210121	1.15679	0.0333847	1.47645	-2.3148	0.133378	1.09686
5448	Kptn	0.154336	0.811534	1.50012	0.590232	1.50549	0.125214	0.902347	1.62393	0.590817	1.5061	0.0333884	1.4764	-2.31475	0.559658	1.47392
308	Kcnt2	0.0510743	1.2918	2.12019	1.2858	2.43817	0.0320812	1.49375	2.36261	1.39231	2.62498	0.0334187	1.47601	-2.3143	0.953909	1.93711
6565	Gtf2e1	0.166039	0.779789	1.45587	0.30921	1.23903	0.00868755	2.0611	3.01586	0.545693	1.45972	0.0334901	1.47508	-2.31323	0.308997	1.23885
5031	Samd14	0.127562	0.89428	1.61309	0.269154	1.2051	0.0190125	1.72096	2.62789	0.372148	1.29428	0.0335745	1.47399	-2.31197	0.231355	1.17394
1612	Slc1a1	0.0537022	1.27001	2.09356	0.29561	1.2274	0.00891606	2.04983	3.00311	0.40869	1.32748	0.0336275	1.47331	-2.31118	0.232937	1.17522
979	Sparc	0.775725	0.110292	0.290082	0.196705	1.14608	0.606622	0.217082	0.525935	0.105029	1.07552	0.0336543	1.47296	-2.31078	0.391209	1.31149
4166	D3Ertd751e	0.0872689	1.05914	1.82951	0.459905	1.37545	0.0916682	1.03778	1.80204	0.472354	1.38737	0.0336588	1.4729	-2.31071	0.406284	1.32527
4989	Cmtm4	0.372886	0.428424	0.91851	0.243103	1.18354	0.0640392	1.19355	1.99921	0.399713	1.31925	0.0336619	1.47286	-2.31067	0.318697	1.2472
3202	Sema4a	0.566357	0.24691	0.586356	0.0860709	1.06148	0.00834827	2.0784	3.0354	0.332666	1.25934	0.0336624	1.47285	-2.31066	0.198307	1.14735
1691	Atp5mf	0.409423	0.387827	0.848636	0.106673	1.07674	0.0563695	1.24896	2.06772	0.203472	1.15147	0.033681	1.47261	-2.31038	0.15841	1.11606
4025	Elac2	0.227644	0.642745	1.25794	0.164455	1.12074	0.0178633	1.74804	2.6591	0.2897	1.22239	0.0336871	1.47254	-2.31029	0.179622	1.13259
4508	Tox4	0.205598	0.686982	1.32316	0.224339	1.16824	0.0646481	1.18944	1.99409	0.283693	1.21731	0.0337469	1.47177	-2.30941	0.221651	1.16607
2189	Pla2g6	0.805535	0.0939156	-0.250585	-0.0122711	0.99153	0.154062	0.812304	1.50119	0.0818411	1.05837	0.0337487	1.47174	-2.30938	0.108095	1.0778
964	Kit	0.255651	0.592352	1.18188	0.107625	1.07745	0.0914306	1.03891	1.80349	0.146378	1.10679	0.0337607	1.47159	-2.3092	0.126026	1.09128
7067	Yipf5	0.236518	0.626136	1.23309	0.163034	1.11964	0.0600451	1.22152	2.03389	0.192401	1.14266	0.0339672	1.46894	-2.30615	0.147942	1.10799
607	Bok	0.315538	0.500949	1.03839	0.185931	1.13755	0.0894096	1.04862	1.81599	0.284577	1.21805	0.0340316	1.46812	-2.3052	0.244966	1.18507
2840	Vps41	0.200778	0.697284	1.33816	0.127429	1.09234	0.0374104	1.42701	2.28331	0.165281	1.12138	0.0341388	1.46675	-2.30363	0.11468	1.08273
6577	Tbc1d7	0.318504	0.496885	1.03183	0.24017	1.18113	0.0507703	1.29439	2.12336	0.367159	1.28981	0.0341788	1.46624	-2.30304	0.274415	1.2095
7033	Ipo7	0.224686	0.648425	1.26639	0.144788	1.10557	0.0437412	1.35911	2.20185	0.194789	1.14456	0.0342279	1.46562	-2.30232	0.139507	1.10153
1672	Ddx6	0.470784	0.327178	0.739898	0.0679792	1.04825	0.00924178	2.03424	2.98549	0.236911	1.17847	0.0343647	1.46389	-2.30033	0.139893	1.10182
724	Pde6d	0.0649072	1.18771	1.99193	0.141164	1.10279	0.0456968	1.34011	2.1789	0.146581	1.10694	0.03441	1.46331	-2.29966	0.106366	1.07651
2790	Prune2	0.534397	0.272136	0.635942	0.0937805	1.06716	0.0430551	1.36598	2.21012	0.286983	1.22009	0.0344282	1.46309	-2.2994	0.214709	1.16047
5159	Lzic	0.970454	0.0130251	0.0376619	-0.0278096	0.980908	0.0276394	1.55847	2.43886	0.30097	1.23197	0.0344556	1.46274	-2.299	0.228178	1.17136
2356	Rbm15	0.540234	0.267418	0.626768	0.151304	1.11057	0.125036	0.902966	1.62476	0.233691	1.17584	0.0344846	1.46237	-2.29858	0.232846	1.17515
4857	Fhip2a	0.639449	0.194194	0.478134	0.144281	1.10518	0.065485	1.18386	1.98714	0.262444	1.19951	0.034493	1.46227	-2.29846	0.220248	1.16493
5878	Fastkd2	0.355713	0.4489	0.952965	0.26326	1.20019	0.071384	1.1464	1.94027	0.40333	1.32256	0.0344981	1.4622	-2.29838	0.327619	1.25494
1495	Nf2	0.273905	0.5624	1.13569	0.123691	1.08952	0.0379153	1.42119	2.27636	0.198104	1.14719	0.0345285	1.46182	-2.29794	0.138536	1.10079
4113	Kctd3	0.270205	0.568307	1.14486	0.134035	1.09736	0.0899265	1.04611	1.81277	0.200873	1.14939	0.0345878	1.46108	-2.29708	0.171496	1.12623
6751	Exosc8	0.192241	0.716155	1.36545	0.305181	1.23557	0.143646	0.842707	1.54307	0.3055	1.23585	0.0345889	1.46106	-2.29707	0.302499	1.23328
4114	Pef1	0.196611	0.706392	1.35136	0.260176	1.19762	0.0366221	1.43626	2.29435	0.376094	1.29782	0.0345896	1.46105	-2.29706	0.259165	1.19679
6647	Tmem50b	0.20138	0.695984	1.33627	0.387973	1.30855	0.0558816	1.25273	2.07236	0.571594	1.48616	0.0345944	1.46099	-2.29699	0.429337	1.34661
7456	Pclo	0.884807	0.0531512	0.147364	0.0395997	1.02783	0.0748576	1.12576	1.91428	0.181729	1.13424	0.0346202	1.46067	-2.29661	0.167435	1.12306
2902	Slc25a35	0.490229	0.309601	0.707291	0.0821133	1.05857	0.0337131	1.4722	2.33709	0.160818	1.11792	0.0346643	1.46012	-2.29598	0.113756	1.08204
5737	Pcdhgc5	0.890603	0.050316	0.139897	0.0235895	1.01649	0.0212388	1.67287	2.57226	0.220456	1.1651	0.0346795	1.45993	-2.29576	0.156726	1.11475
1474	H1-3	0.235415	0.628167	1.23614	0.26678	1.20312	0.181738	0.740553	1.4004	0.221313	1.16579	0.0347438	1.45912	-2.29483	0.242419	1.18297
4036	Arhgap33	0.829064	0.0814119	0.219703	0.0487133	1.03434	0.0292887	1.5333	2.40928	0.232761	1.17508	0.0348315	1.45803	-2.29356	0.171838	1.12649
5140	Ube2q2	0.120719	0.918224	1.64519	0.15368	1.1124	0.00552998	2.25728	3.23688	0.265495	1.20205	0.0348328	1.45801	-2.29354	0.142497	1.10381
1544	Kcnj9	0.313259	0.504096	1.04347	0.155035	1.11345	0.0694202	1.15851	1.95547	0.266113	1.20256	0.0349123	1.45702	-2.2924	0.212698	1.15885
1856	Ufm1	0.30414	0.516926	1.06404	0.16685	1.1226	0.143586	0.842888	1.54331	0.16448	1.12076	0.034948	1.45658	-2.29189	0.164503	1.12078
1625	Ube2e3	0.103089	0.986789	1.7358	0.835424	1.78438	0.0642208	1.19232	1.99768	0.99043	1.98678	0.0349533	1.45651	-2.29181	0.766913	1.70163
7763	P2rx7	0.247733	0.606016	1.2027	0.122711	1.08878	0.0962631	1.01654	1.77456	0.14923	1.10898	0.0349765	1.45622	-2.29148	0.129317	1.09378
173	Rasgef1a	0.759933	0.119225	0.311199	0.0813272	1.05799	0.44846	0.348276	0.778363	0.125663	1.09101	0.0350076	1.45584	-2.29104	0.294609	1.22655
1810	Polr2i	0.668116	0.175148	0.437311	0.102566	1.07368	0.252647	0.597486	1.18972	0.148146	1.10814	0.0350257	1.45561	-2.29078	0.210332	1.15695
1518	Gfpt1	0.736668	0.132728	0.342579	0.0694125	1.04929	0.0268971	1.57029	2.45272	0.216061	1.16156	0.0350362	1.45548	-2.29063	0.153837	1.11252
3099	Cox7a2l	0.422673	0.373996	0.824319	0.14138	1.10296	0.0951109	1.02177	1.78134	0.245191	1.18525	0.0350685	1.45508	-2.29016	0.217252	1.16252
2583	Arfgef3	0.376254	0.424518	0.91188	0.101506	1.07289	0.0698157	1.15605	1.95238	0.172862	1.12729	0.0350688	1.45508	-2.29016	0.139561	1.10157
6460	Ilf2	0.344843	0.462379	0.975376	0.127414	1.09233	0.0136727	1.86414	2.79222	0.250461	1.18959	0.0350778	1.45497	-2.29003	0.151083	1.1104
2007	Sbds	0.276733	0.557939	1.12875	0.129937	1.09425	0.0806515	1.09339	1.87326	0.162524	1.11924	0.0350922	1.45479	-2.28982	0.134268	1.09754
1839	Fgf12	0.31118	0.506989	1.04812	0.147819	1.10789	0.155066	0.809483	1.49728	0.186852	1.13828	0.0351019	1.45467	-2.28969	0.192652	1.14286
3415	Larp4b	0.372239	0.429179	0.919789	0.18049	1.13327	0.0484895	1.31435	2.14766	0.32972	1.25677	0.0351067	1.45461	-2.28962	0.244586	1.18475
4440	Rgs7bp	0.851931	0.0695955	0.189903	0.0868563	1.06205	0.202541	0.693486	1.33264	0.173164	1.12753	0.0351696	1.45383	-2.28872	0.228532	1.17164
6940	Eif3k	0.267941	0.571961	1.15052	0.230805	1.17349	0.114584	0.940876	1.67533	0.315153	1.24414	0.0352237	1.45316	-2.28795	0.288774	1.2216
198	Nhsl2	0.409572	0.387669	0.848359	0.138579	1.10082	0.179324	0.746361	1.40867	0.14466	1.10547	0.0352484	1.45286	-2.2876	0.161305	1.1183
2707	Wdr20	0.150263	0.823147	1.51618	0.435714	1.35258	0.0456826	1.34025	2.17906	0.607271	1.52337	0.0352623	1.45269	-2.2874	0.43418	1.35114
5533	Ciz1	0.651731	0.185931	0.460545	0.0850358	1.06071	0.0403783	1.39385	2.24364	0.283816	1.21741	0.035285	1.45241	-2.28707	0.213313	1.15935
497	Clta	0.482435	0.316561	0.720266	0.233466	1.17566	0.15195	0.818299	1.50948	0.265571	1.20211	0.0352966	1.45227	-2.28691	0.279791	1.21402
7850	Kcnj16	0.414048	0.382949	0.84009	0.208238	1.15528	0.119888	0.921226	1.64919	0.266289	1.20271	0.0353397	1.45174	-2.2863	0.253307	1.19194
6317	Ramac	0.492391	0.30769	0.703714	0.167073	1.12278	0.0364304	1.43854	2.29706	0.286428	1.21962	0.0353607	1.45148	-2.286	0.204628	1.15239
7524	Slc35a2	0.138509	0.858523	-1.56467	-1.07038	0.476194	0.170169	0.769119	-1.44087	-1.14443	0.452368	0.0354087	1.45089	2.28532	-1.20643	0.433341
944	mt-Nd2	0.108479	0.964653	1.70675	0.280124	1.2143	0.0126392	1.89828	2.83115	0.443946	1.36032	0.0354811	1.45	-2.28429	0.259095	1.19673
2423	Abraxas2	0.738067	0.131904	0.340683	0.0522794	1.0369	0.0435554	1.36096	2.20408	0.177923	1.13125	0.035495	1.44983	-2.2841	0.138095	1.10045
4918	Tph2	0.126812	0.896838	1.61653	0.202457	1.15066	0.252845	0.597145	1.1892	0.148659	1.10854	0.0355044	1.44972	-2.28396	0.19123	1.14174
2552	Fbxo7	0.328106	0.483986	1.01087	0.0928081	1.06644	0.070719	1.15046	1.94537	0.137103	1.09969	0.0356365	1.44811	-2.2821	0.109824	1.0791
162	Tbc1d8b	0.147544	0.831079	1.5271	0.217268	1.16253	0.249053	0.603707	1.19919	0.131318	1.09529	0.0356667	1.44774	-2.28167	0.167139	1.12283
3334	Zrsr2-ps1	0.191922	0.716875	1.36649	0.421539	1.33936	0.244949	0.610924	1.21014	0.291385	1.22382	0.0356849	1.44751	-2.28142	0.367816	1.2904
612	Clcn6	0.841659	0.0748639	0.203266	0.0519332	1.03665	0.0497365	1.30333	2.13424	0.196361	1.1458	0.0357015	1.44731	-2.28118	0.160345	1.11755
6717	Sec23b	0.46654	0.331111	0.747123	0.0896182	1.06409	0.103685	0.984283	1.73252	0.115918	1.08366	0.0357022	1.44731	-2.28117	0.105872	1.07614
6122	Tmem121b	0.648299	0.188225	0.465445	0.0763741	1.05436	0.030275	1.51892	2.39233	0.263715	1.20057	0.0357517	1.4467	-2.28048	0.187223	1.13857
7838	Hdac5	0.579671	0.236818	0.56614	0.10629	1.07646	0.0654891	1.18383	1.9871	0.241351	1.1821	0.0357653	1.44654	-2.28029	0.198181	1.14725
7294	Fmn2	0.4461	0.350568	0.782498	0.137276	1.09983	0.0348254	1.4581	2.32035	0.25901	1.19666	0.0357709	1.44647	-2.28021	0.181583	1.13413
2289	Sox10	0.060102	1.22111	-2.03338	-1.30845	0.403754	0.0640475	1.1935	-1.99913	-1.30535	0.404624	0.0358743	1.44522	2.27876	-1.01646	0.494327
3817	Mycbp2	0.889993	0.0506135	0.140682	0.0688533	1.04888	0.147787	0.830363	1.52612	0.213369	1.15939	0.0358902	1.44502	-2.27853	0.24474	1.18488
2992	Dvl2	0.300024	0.522843	1.07348	0.216154	1.16163	0.0353938	1.45107	2.31199	0.352413	1.27669	0.0359309	1.44453	-2.27797	0.24214	1.18275
7298	Gde1	0.485589	0.313731	0.715001	0.164196	1.12054	0.0685776	1.16382	1.96211	0.299456	1.23068	0.0359314	1.44453	-2.27796	0.243929	1.18421
5019	Rbm17	0.432709	0.363804	0.806226	0.143718	1.10475	0.105191	0.978023	1.72432	0.205667	1.15322	0.0359374	1.44445	-2.27787	0.187206	1.13856
2767	Pds5b	0.256816	0.590379	1.17886	0.351891	1.27623	0.14709	0.832418	1.52895	0.311005	1.24057	0.0360465	1.44314	-2.27635	0.30971	1.23946
3830	Tppp	0.18793	0.726004	1.3796	0.165691	1.1217	0.039629	1.40199	2.25339	0.283568	1.2172	0.0360947	1.44256	-2.27568	0.196518	1.14593
6214	Myl9	0.214809	0.667948	1.29527	0.578532	1.49333	0.187346	0.727355	1.38154	0.465705	1.38099	0.0361228	1.44222	-2.27529	0.511478	1.42551
4865	Ppwd1	0.108529	0.964455	1.70649	0.182111	1.13454	0.0361972	1.44133	2.30039	0.209504	1.15629	0.036125	1.44219	-2.27526	0.142697	1.10397
6352	Fam136a	0.0718616	1.1435	1.93663	0.258577	1.1963	0.132219	0.878705	1.59207	0.196187	1.14567	0.0361277	1.44216	-2.27522	0.188439	1.13953
2660	Ag2	0.307392	0.512307	1.05665	0.248188	1.18771	0.210368	0.67702	1.30859	0.257584	1.19547	0.0361425	1.44198	-2.27501	0.30264	1.2334
7714	Tpbg	0.46022	0.337034	0.757956	0.228397	1.17153	0.152063	0.817977	1.50904	0.228861	1.17191	0.036174	1.4416	-2.27458	0.23855	1.17981
2491	Dhps	0.301813	0.520262	1.06936	0.119939	1.08669	0.135238	0.8689	1.57878	0.178362	1.1316	0.0361853	1.44147	-2.27442	0.172893	1.12732
1499	Nedd4	0.401686	0.396113	0.863074	0.0994096	1.07133	0.0412664	1.3844	2.23229	0.16077	1.11788	0.0361917	1.44139	-2.27433	0.115197	1.08312
584	Ptpn9	0.13866	0.858048	1.56402	0.282258	1.2161	0.0255861	1.592	2.47812	0.41637	1.33457	0.0362432	1.44077	-2.27362	0.266804	1.20314
3671	Paqr9	0.340281	0.468163	-0.984928	-0.0755731	0.948965	0.00369959	2.43185	-3.43288	-0.439148	0.73757	0.0362546	1.44064	2.27346	-0.231503	0.851747
6465	Snx7	0.381383	0.418639	0.901863	0.135422	1.09841	0.0586947	1.2314	2.04609	0.239019	1.18019	0.0362967	1.44013	-2.27287	0.183775	1.13585
3347	Plekhg5	0.64514	0.190346	0.469965	0.0761559	1.05421	0.108556	0.964346	1.70634	0.179001	1.1321	0.0363189	1.43987	-2.27257	0.171491	1.12622
6474	Rnf181	0.123801	0.907275	1.63054	0.231683	1.1742	0.0882513	1.05428	1.82327	0.221759	1.16615	0.0363416	1.4396	-2.27225	0.184878	1.13672
3716	Igsf3	0.267705	0.572344	1.15111	0.216316	1.16176	0.0441195	1.35537	2.19733	0.340202	1.26593	0.0364156	1.43871	-2.27123	0.242064	1.18268
4339	Usp54	0.173413	0.760918	1.4293	0.232938	1.17523	0.112476	0.94894	1.68601	0.219837	1.1646	0.0364346	1.43849	-2.27097	0.197134	1.14642
6002	Pdxdc1	0.326959	0.485507	1.01335	0.143223	1.10437	0.0963458	1.01617	1.77407	0.156965	1.11494	0.0364748	1.43801	-2.27041	0.136156	1.09897
4148	Ptgr3	0.397246	0.40094	0.871443	0.110269	1.07943	0.0752583	1.12345	1.91136	0.15071	1.11012	0.0365217	1.43745	-2.26977	0.123302	1.08922
4340	Unk	0.465638	0.331951	0.748663	0.0763401	1.05434	0.0168022	1.77463	2.6897	0.260718	1.19807	0.0365304	1.43735	-2.26965	0.163052	1.11965
581	Cpsf2	0.219082	0.659393	1.28265	0.246903	1.18666	0.0825874	1.08309	1.86014	0.258744	1.19644	0.0365333	1.43731	-2.26961	0.211958	1.15826
5505	Rcc1	0.25742	0.589358	1.1773	0.224467	1.16835	0.122863	0.91058	1.63497	0.262274	1.19937	0.0365636	1.43695	-2.26919	0.243671	1.184
6113	Brap	0.131817	0.880029	1.59386	0.152344	1.11137	0.0254129	1.59495	2.48157	0.236618	1.17823	0.0366456	1.43598	-2.26806	0.151147	1.11045
3019	Ncor1	0.262729	0.580492	1.16368	0.170576	1.12551	0.0680043	1.16746	1.96667	0.239206	1.18034	0.036761	1.43461	-2.26648	0.18685	1.13828
4289	Anks1b	0.588357	0.230359	0.553081	0.0573223	1.04053	0.0687598	1.16267	1.96067	0.186822	1.13825	0.0367905	1.43426	-2.26608	0.154452	1.113
4915	Adgrb2	0.592863	0.227046	0.546345	0.094802	1.06792	0.0461904	1.33545	2.17325	0.294184	1.22619	0.0368073	1.43407	-2.26585	0.222204	1.16651
7285	Habp4	0.256461	0.590979	1.17978	0.304733	1.23519	0.0631842	1.19939	2.00646	0.455858	1.3716	0.0368541	1.43351	-2.26521	0.349371	1.274
205	Thoc2	0.412636	0.384433	0.842693	0.152472	1.11147	0.0502721	1.29867	2.12858	0.228911	1.17195	0.0368853	1.43315	-2.26478	0.170303	1.12529
2646	Ankrd27	0.309107	0.509892	1.05278	0.114595	1.08267	0.00620903	2.20698	3.18032	0.289342	1.22208	0.0370518	1.43119	-2.26251	0.158019	1.11575
4030	Dpp8	0.201598	0.695515	1.33559	0.163054	1.11965	0.0213582	1.67044	2.56944	0.287811	1.22079	0.0370715	1.43096	-2.26224	0.179187	1.13225
2035	Selenop	0.180025	0.744666	1.40626	0.399944	1.31946	0.206856	0.684332	1.31929	0.338227	1.2642	0.0372034	1.42942	-2.26046	0.385985	1.30675
5681	Prkag2	0.159402	0.797507	1.48063	0.131019	1.09507	0.0401985	1.39579	2.24596	0.182816	1.1351	0.0372474	1.4289	-2.25986	0.126095	1.09134
765	Atxn2	0.667639	0.175459	0.437985	0.0735508	1.0523	0.0445531	1.35112	2.19221	0.175254	1.12916	0.0372686	1.42866	-2.25957	0.132961	1.09654
4730	Tmem161b	0.112185	0.950064	1.6875	0.55789	1.47212	0.024664	1.60794	2.49674	0.716542	1.64324	0.0372758	1.42857	-2.25948	0.454416	1.37023
5341	Ptcd2	0.406471	0.39097	0.854123	0.149701	1.10934	0.376537	0.424192	0.911326	0.14306	1.10424	0.037279	1.42854	-2.25943	0.250586	1.18969
5638	Golga4	0.503246	0.298219	0.685891	0.105827	1.07611	0.0964448	1.01572	1.7735	0.145455	1.10608	0.0372844	1.42847	-2.25936	0.129398	1.09384
2983	Cldn11	0.109814	0.959344	1.69975	0.550219	1.46431	0.268718	0.570704	1.14858	0.327468	1.25481	0.0373021	1.42827	-2.25912	0.432764	1.34982
2750	Shank3	0.758589	0.119993	0.313002	0.0669773	1.04752	0.0513674	1.28931	2.11716	0.232028	1.17448	0.037327	1.42798	-2.25878	0.184957	1.13678
7816	Fem1aa	0.207974	0.681991	1.31587	0.145511	1.10612	0.237569	0.62421	1.2302	0.115598	1.08342	0.037401	1.42712	-2.25779	0.141948	1.10339
6067	Ddah2	0.341966	0.466017	0.981389	0.131928	1.09576	0.273504	0.563037	1.13669	0.134361	1.09761	0.037405	1.42707	-2.25773	0.182624	1.13495
3110	Smarcd1	0.803685	0.0949142	0.253023	0.0469695	1.03309	0.0519125	1.28473	2.11156	0.218293	1.16336	0.0374554	1.42649	-2.25705	0.176053	1.12979
7684	Tusc2	0.371228	0.430359	0.921789	0.132856	1.09646	0.132965	0.876261	1.58876	0.171856	1.12651	0.0375662	1.4252	-2.25556	0.165799	1.12179
7388	Hacl1	0.373584	0.427611	0.917132	0.229247	1.17222	0.10766	0.967945	1.71108	0.424237	1.34186	0.037577	1.42508	-2.25542	0.380896	1.30215
6950	Telo2	0.248224	0.605156	1.2014	0.129182	1.09367	0.0752103	1.12372	1.91171	0.188295	1.13942	0.0376193	1.42459	-2.25485	0.149888	1.10948
346	Ift140	0.0840848	1.07528	1.85018	0.338225	1.2642	0.0737895	1.13201	1.92216	0.336627	1.2628	0.0376226	1.42455	-2.25481	0.267003	1.20331
5398	Arl6ip5	0.647173	0.18898	0.467055	0.146723	1.10705	0.274292	0.561787	1.13474	0.143637	1.10469	0.0376575	1.42415	-2.25434	0.208709	1.15565
403	Zc3h13	0.0851571	1.06978	1.84314	0.875717	1.83492	0.075212	1.12371	1.91169	0.755419	1.68812	0.037729	1.42332	-2.25338	0.601685	1.51749
7155	Rnf114	0.366878	0.435479	0.930438	0.161727	1.11863	0.0795107	1.09957	1.88112	0.2401	1.18107	0.0377573	1.423	-2.25301	0.196809	1.14616
3981	Hapln3	0.496598	0.303995	0.696779	0.120622	1.0872	0.201529	0.695663	1.3358	0.133962	1.0973	0.0378257	1.42221	-2.25209	0.157604	1.11543
1473	H1-5	0.405053	0.392488	0.856768	0.208822	1.15574	0.135912	0.866743	1.57585	0.258354	1.19611	0.0379239	1.42109	-2.25079	0.252107	1.19095
5285	Cgref1	0.258795	0.587044	1.17375	0.384725	1.30561	0.0499565	1.30141	2.13191	0.643101	1.56168	0.0379355	1.42095	-2.25063	0.464863	1.38019
4726	Bbs4	0.522048	0.28229	0.65554	0.0908253	1.06498	0.321766	0.49246	1.02466	0.122542	1.08865	0.0379423	1.42088	-2.25054	0.192615	1.14283
2551	Esyt1	0.349541	0.456502	0.965629	0.265112	1.20173	0.209465	0.678888	1.31133	0.242151	1.18275	0.0379641	1.42063	-2.25025	0.282189	1.21604
5770	Bag2	0.460892	0.3364	0.7568	0.165002	1.12117	0.256952	0.590147	1.17851	0.19167	1.14209	0.0380472	1.41968	-2.24915	0.255193	1.1935
7531	Smap	0.263962	0.578459	1.16055	0.10742	1.0773	0.136735	0.864119	1.57229	0.173164	1.12753	0.0380679	1.41944	-2.24887	0.165719	1.12172
72	Chd5	0.339146	0.469613	0.987319	0.179406	1.13242	0.0906662	1.04255	1.80819	0.215767	1.16132	0.0381079	1.41898	-2.24834	0.182293	1.13469
5220	Blmh	0.13953	0.855333	1.56032	0.208746	1.15568	0.042852	1.36803	2.2126	0.29059	1.22314	0.038125	1.41879	-2.24812	0.201992	1.15029
6139	Ubqln4	0.0890758	1.05024	1.81808	0.170431	1.12539	0.00321514	2.4928	3.50127	0.313831	1.243	0.0381413	1.4186	-2.2479	0.158429	1.11607
7192	Dmap1	0.571229	0.24319	-0.578929	-0.0165085	0.988622	0.18194	0.740071	1.39971	0.170459	1.12542	0.0382032	1.4179	-2.24708	0.25676	1.19479
4743	Guf1	0.451104	0.345723	0.773746	0.128338	1.09303	0.101491	0.993573	1.74467	0.182583	1.13491	0.0382322	1.41757	-2.2467	0.162357	1.11911
1993	Csnk2b	0.975013	0.0109894	-0.0318478	0.0648408	1.04597	0.0636104	1.19647	2.00283	0.238574	1.17983	0.0382379	1.41751	-2.24663	0.212439	1.15865
2519	Rars2	0.638167	0.195065	0.479977	0.112508	1.08111	0.199994	0.698983	1.34062	0.202215	1.15046	0.0382659	1.41719	-2.24625	0.24385	1.18415
1900	Tsc22d1	0.358401	0.44563	0.947496	0.132673	1.09632	0.0683972	1.16496	1.96354	0.21081	1.15734	0.0382934	1.41688	-2.24589	0.165468	1.12153
5462	Abhd4	0.203947	0.690482	1.32826	0.153347	1.11215	0.107322	0.969311	1.71288	0.168042	1.12353	0.0383211	1.41656	-2.24553	0.147	1.10726
4524	Dock1	0.434055	0.362455	0.80382	0.100863	1.07242	0.158941	0.798764	1.48239	0.117674	1.08498	0.0383218	1.41655	-2.24552	0.122393	1.08854
1363	Drg1	0.31883	0.496441	1.03111	0.112094	1.0808	0.00543227	2.26502	3.24558	0.249385	1.1887	0.0384518	1.41508	-2.24381	0.133766	1.09715
6344	Slc25a11	0.983065	0.00741797	0.0215837	0.0335639	1.02354	0.0325562	1.48737	2.35506	0.201104	1.14958	0.0384575	1.41502	-2.24373	0.152862	1.11177
2745	Amz2	0.413688	0.383328	0.840754	0.124349	1.09002	0.0667385	1.17562	1.97687	0.210556	1.15713	0.038529	1.41421	-2.2428	0.165451	1.12152
4751	Adgra1	0.86327	0.0638531	0.175194	0.0745849	1.05306	0.0576968	1.23885	2.05527	0.285364	1.21872	0.0386218	1.41317	-2.24158	0.237159	1.17867
2731	Elmod1	0.107895	0.966999	1.70984	0.25082	1.18988	0.321822	0.492385	1.02454	0.125472	1.09086	0.0387792	1.4114	-2.23953	0.185591	1.13728
5423	Gpn1	0.656255	0.182927	0.454105	0.094394	1.06762	0.0366999	1.43533	2.29325	0.244946	1.18505	0.0388371	1.41075	-2.23877	0.176677	1.13028
3158	Eif2b4	0.796112	0.099026	0.263022	0.131102	1.09513	0.038829	1.41084	2.264	0.370637	1.29292	0.0388953	1.4101	-2.23801	0.278041	1.21255
1519	Pfkm	0.164541	0.783726	1.46139	0.163225	1.11979	0.0193823	1.71259	2.61823	0.240771	1.18162	0.0388985	1.41007	-2.23797	0.146134	1.1066
370	Akap13	0.031506	1.50161	2.3719	0.595986	1.51151	0.102776	0.988109	1.73753	0.354328	1.27839	0.0389147	1.40989	-2.23776	0.317175	1.24589
129	Skt	0.799566	0.0971455	-0.258458	0.0221704	1.01549	0.101648	0.9929	1.74379	0.236025	1.17774	0.0389272	1.40975	-2.2376	0.253153	1.19181
1163	Gba1	0.341859	0.466153	0.981614	0.0860183	1.06144	0.0868882	1.06104	1.83195	0.134268	1.09754	0.0389692	1.40928	-2.23706	0.111528	1.08037
4188	Ccny	0.313757	0.503407	1.04235	0.283237	1.21692	0.0447366	1.34934	2.19005	0.578992	1.49381	0.0389832	1.40912	-2.23687	0.409391	1.32813
3755	Vma21	0.0798082	1.09795	1.87906	0.308801	1.23868	0.0462612	1.33478	2.17244	0.347936	1.27274	0.0389873	1.40908	-2.23682	0.246198	1.18608
6683	Nos1ap	0.595089	0.225418	0.543027	0.122071	1.0883	0.273733	0.562672	1.13612	0.135925	1.0988	0.039052	1.40836	-2.23598	0.192502	1.14274
2872	Ccdc88a	0.522675	0.281768	0.654539	0.0787287	1.05609	0.0403308	1.39436	2.24425	0.18102	1.13369	0.0390673	1.40819	-2.23578	0.129481	1.0939
4091	Arhgap32	0.997611	0.00103872	0.0030443	0.0314984	1.02207	0.0291896	1.53477	2.41101	0.250822	1.18988	0.0390973	1.40785	-2.2354	0.186743	1.13819
3627	Naa50	0.406385	0.391063	0.854285	0.142408	1.10375	0.290252	0.537225	1.09626	0.082753	1.05904	0.039116	1.40765	-2.23515	0.116855	1.08437
2792	Ddx46	0.585535	0.232447	0.557312	0.139948	1.10187	0.0253325	1.59632	2.48318	0.289773	1.22245	0.0391263	1.40753	-2.23502	0.193227	1.14332
5305	Gtf3c5	0.151514	0.819547	1.51121	0.270078	1.20587	0.107239	0.969646	1.71332	0.273733	1.20893	0.0391448	1.40733	-2.23478	0.237967	1.17933
4315	Fbxo44	0.223177	0.65135	1.27074	0.744865	1.67582	0.351602	0.453949	0.961384	0.618654	1.53544	0.0391485	1.40729	-2.23473	0.978186	1.96999
1123	Ntrk2	0.339924	0.468618	0.985679	0.123866	1.08965	0.0673063	1.17194	1.97227	0.222821	1.16701	0.0391616	1.40714	-2.23457	0.172851	1.12728
5327	Commd5	0.301726	0.520388	1.06956	0.169311	1.12452	0.0646228	1.18961	1.9943	0.297823	1.22929	0.0391877	1.40685	-2.23423	0.227591	1.17088
6185	Nanp	0.130319	0.884992	1.60057	0.250076	1.18927	0.0121543	1.91527	2.85049	0.35815	1.28178	0.0392011	1.4067	-2.23406	0.204243	1.15208
4659	Klhl12	0.0727782	1.138	1.9297	0.422086	1.33986	0.128302	0.891768	1.6097	0.347303	1.27218	0.0392662	1.40598	-2.23322	0.324332	1.25208
5155	Plcl2	0.747284	0.126514	0.328217	0.0697694	1.04955	0.0580046	1.23654	2.05242	0.217068	1.16237	0.0392945	1.40567	-2.23285	0.175033	1.12899
919	Vti1a	0.329212	0.482524	1.00849	0.314621	1.24369	0.154349	0.811497	1.50007	0.513458	1.42747	0.0393034	1.40557	-2.23274	0.515246	1.42924
7749	Cog1	0.585523	0.232456	0.557331	0.1259	1.09119	0.126348	0.898432	1.61867	0.158278	1.11595	0.0393045	1.40556	-2.23272	0.154288	1.11287
4244	Cggbp1	0.314879	0.501856	1.03986	0.149139	1.10891	0.164712	0.783275	1.46075	0.164449	1.12074	0.0393422	1.40514	-2.23224	0.169099	1.12436
522	Clock	0.140973	0.850865	1.55423	0.403506	1.32272	0.132887	0.876518	1.58911	0.399822	1.31935	0.0394203	1.40428	-2.23124	0.37333	1.29534
1408	Fmr1	0.853281	0.0689081	0.18815	0.0587483	1.04156	0.0570883	1.24345	2.06094	0.140456	1.10225	0.0394593	1.40385	-2.23074	0.115466	1.08332
5322	Cdc16	0.251739	0.59905	1.19211	0.10969	1.079	0.0582157	1.23496	2.05048	0.156525	1.1146	0.0395434	1.40293	-2.22966	0.115865	1.08362
6914	Ddx59	0.327942	0.484203	1.01123	0.381935	1.30309	0.0822411	1.08491	1.86247	0.752292	1.68447	0.0395458	1.4029	-2.22963	0.612159	1.52854
5215	Glyctk	0.265152	0.576505	1.15754	0.297802	1.22927	0.0600885	1.22121	2.0335	0.410075	1.32875	0.0395622	1.40272	-2.22942	0.306134	1.23639
696	Cd200	0.616016	0.210408	0.512131	0.0423295	1.02978	0.0526195	1.27885	2.10438	0.230089	1.17291	0.0395985	1.40232	-2.22895	0.176264	1.12995
2106	Rpl36a	0.470675	0.327278	0.740083	0.146163	1.10662	0.325254	0.487778	1.01705	0.129389	1.09383	0.0396122	1.40217	-2.22878	0.200038	1.14873
5856	Cog2	0.170597	0.768028	1.43933	0.189051	1.14001	0.0789755	1.10251	1.88485	0.168977	1.12426	0.039616	1.40213	-2.22873	0.134063	1.09738
5315	Tmcc3	0.228893	0.640368	1.2544	0.178095	1.13139	0.207989	0.681959	1.31582	0.141005	1.10267	0.0396529	1.40172	-2.22826	0.159404	1.11683
2715	Grk3	0.490427	0.309426	0.706964	0.0851754	1.06082	0.107442	0.968828	1.71224	0.147631	1.10775	0.0396692	1.40155	-2.22805	0.133359	1.09684
5838	Ivns1abp	0.234286	0.630254	1.23927	0.113987	1.08221	0.0251097	1.60016	2.48766	0.249752	1.189	0.0397209	1.40098	-2.22739	0.157564	1.1154
7536	Morf4l2	0.400257	0.397661	0.865761	0.208102	1.15517	0.0242527	1.61524	2.50526	0.407081	1.326	0.0397379	1.40079	-2.22717	0.26071	1.19807
1798	Nploc4	0.591943	0.22772	0.547718	0.0798118	1.05688	0.0750624	1.12458	1.91278	0.190754	1.14136	0.0397433	1.40074	-2.22711	0.15826	1.11594
6051	Cds2	0.379501	0.420787	0.905528	0.12661	1.09173	0.207568	0.682839	1.31711	0.105378	1.07578	0.0397696	1.40045	-2.22677	0.121353	1.08775
2776	Phactr4	0.18792	0.726028	1.37964	0.207908	1.15501	0.11742	0.930258	1.66123	0.204276	1.15211	0.0397824	1.40031	-2.22661	0.182337	1.13472
3082	Soat1	0.233465	0.631777	1.24155	0.347205	1.27209	0.135172	0.869113	1.57907	0.343189	1.26856	0.0398163	1.39994	-2.22618	0.322642	1.25062
4343	Arhgap22	0.126717	0.897165	1.61697	0.305694	1.23601	0.261845	0.581956	1.16594	0.209121	1.15598	0.0399085	1.39893	-2.22501	0.267267	1.20353
7439	Maged1	0.798936	0.0974879	0.25929	0.0473728	1.03338	0.168434	0.77357	1.44714	0.138263	1.10058	0.0399158	1.39886	-2.22491	0.158121	1.11583
5198	Agpat4	0.0890808	1.05022	1.81805	0.181094	1.13374	0.0272492	1.56465	2.4461	0.216709	1.16208	0.0399443	1.39855	-2.22455	0.138197	1.10053
3979	Mtdh	0.284735	0.545559	1.10938	0.278887	1.21326	0.0697008	1.15676	1.95327	0.338559	1.26449	0.0399765	1.3982	-2.22414	0.261829	1.199
1704	Cox7b	0.330623	0.480667	1.00546	0.297671	1.22916	0.0588227	1.23046	2.04492	0.5435	1.4575	0.0400267	1.39765	-2.22351	0.40588	1.3249
7794	Rasal1	0.925116	0.0338036	0.0955838	0.0661971	1.04695	0.0979045	1.0092	1.76502	0.186548	1.13804	0.0400543	1.39735	-2.22316	0.180061	1.13293
1886	Snrpg	0.167039	0.777181	1.45221	0.602905	1.51877	0.0558776	1.25276	2.0724	0.838442	1.78812	0.0400965	1.39689	-2.22262	0.609906	1.52616
6658	Synj2	0.0519665	1.28428	2.11101	0.294432	1.2264	0.0916872	1.03769	1.80192	0.212847	1.15897	0.0401177	1.39666	-2.22236	0.179425	1.13243
5338	Ttc4	0.355705	0.448909	0.95298	0.135254	1.09829	0.0154236	1.81181	2.73236	0.249928	1.18915	0.0401325	1.3965	-2.22217	0.149063	1.10885
4790	Ccdc134	0.234104	0.63059	-1.23978	-1.09509	0.468108	0.144919	0.838876	-1.53781	-1.29128	0.408588	0.0401744	1.39605	2.22164	-1.24346	0.422358
5821	Scpep1	0.121825	0.914263	1.63989	0.262599	1.19964	0.111948	0.950986	1.68872	0.246505	1.18633	0.0401889	1.39589	-2.22146	0.216411	1.16184
5269	Apbb3	0.151009	0.820997	1.51321	0.364697	1.28761	0.00932304	2.03044	2.98119	0.683009	1.60548	0.0403076	1.39461	-2.21996	0.37628	1.29799
3242	Ndufa4	0.782383	0.106581	0.281221	0.0812364	1.05792	0.0877744	1.05663	1.8263	0.195812	1.14537	0.0404502	1.39308	-2.21817	0.175917	1.12968
4575	Gprin3	0.975878	0.0106044	-0.030745	0.0313612	1.02198	0.211898	0.673873	1.30398	0.11287	1.08138	0.0404773	1.39279	-2.21783	0.153246	1.11207
6141	Rims1	0.515719	0.287587	0.665686	0.0778437	1.05544	0.0457845	1.33928	2.17789	0.177733	1.13111	0.0404905	1.39265	-2.21767	0.129088	1.0936
576	Gosr2	0.233528	0.631661	1.24138	0.149003	1.1088	0.0726648	1.13868	1.93056	0.166422	1.12227	0.0405029	1.39251	-2.21751	0.129024	1.09355
3945	Pgrmc2	0.559338	0.252325	0.597112	0.0965062	1.06918	0.173868	0.75978	1.42769	0.153258	1.11208	0.0405157	1.39238	-2.21735	0.167234	1.1229
1989	Rps12	0.417501	0.379342	0.83375	0.125774	1.09109	0.0702901	1.15311	1.94869	0.180738	1.13346	0.0405463	1.39205	-2.21697	0.142203	1.10359
393	Ccdc85c	0.27332	0.563328	1.13714	0.116395	1.08402	0.00370376	2.43136	3.43233	0.309049	1.23889	0.0406112	1.39135	-2.21616	0.158053	1.11578
6639	Chordc1	0.221942	0.65376	1.27431	0.155786	1.11403	0.0250486	1.60122	2.48889	0.271795	1.20731	0.0408345	1.38897	-2.21338	0.170261	1.12526
4157	Elmod2	0.216131	0.665284	1.29134	0.229856	1.17272	0.0292079	1.5345	2.41069	0.362469	1.28562	0.0408378	1.38894	-2.21334	0.232573	1.17493
462	Grip2	0.488157	0.311441	0.710729	0.0930548	1.06663	0.316808	0.499204	1.03558	0.127047	1.09206	0.0410044	1.38717	-2.21127	0.191304	1.1418
2241	Col1a2	0.789864	0.102448	-0.271292	0.00284223	1.00197	0.396097	0.402199	0.87362	0.624087	1.54124	0.0410405	1.38679	-2.21083	1.41112	2.65944
4592	Fndc3a	0.230762	0.636835	1.24912	0.139521	1.10154	0.0485398	1.3139	2.14711	0.20549	1.15308	0.0410786	1.38638	-2.21036	0.144779	1.10556
2404	Marchf5	0.493532	0.306685	0.70183	0.135621	1.09857	0.0982613	1.00762	1.76297	0.281794	1.21571	0.0411055	1.3861	-2.21002	0.245451	1.18546
5846	Tubgcp2	0.550217	0.259466	0.611201	0.0635369	1.04502	0.043507	1.36144	2.20466	0.165332	1.12142	0.0411186	1.38596	-2.20986	0.11913	1.08608
4046	Trrap	0.589866	0.229247	0.550822	0.113244	1.08166	0.0176365	1.75359	2.66549	0.285636	1.21895	0.0411273	1.38587	-2.20975	0.178695	1.13186
3676	Ift172	0.289726	0.538012	1.09751	0.846842	1.79856	0.0236998	1.62525	2.51693	1.4718	2.77368	0.0411505	1.38563	-2.20947	0.918913	1.89069
1968	Gabrb2	0.284909	0.545294	1.10897	0.172511	1.12702	0.102495	0.989297	1.73908	0.328668	1.25585	0.0411627	1.3855	-2.20932	0.280867	1.21492
3272	Raly	0.379141	0.421199	0.906231	0.133724	1.09712	0.0586737	1.23156	2.04628	0.251366	1.19033	0.0411792	1.38532	-2.20911	0.187647	1.1389
431	Crocc2	0.405961	0.391516	0.855074	0.31733	1.24602	0.362982	0.440115	0.938244	0.443241	1.35966	0.0411884	1.38523	-2.209	0.729736	1.65834
6693	Dlgap1	0.822879	0.0846638	-0.227798	-0.0148849	0.989736	0.198341	0.702587	1.34585	0.124991	1.0905	0.0411986	1.38512	-2.20887	0.171616	1.12632
5251	Slc25a42	0.353017	0.452204	0.958478	0.104571	1.07517	0.18599	0.730509	1.38606	0.141341	1.10293	0.0411991	1.38511	-2.20887	0.152348	1.11138
3811	Dek	0.305259	0.515331	1.06149	0.177911	1.13124	0.145146	0.838194	1.53688	0.183659	1.13576	0.0412321	1.38476	-2.20846	0.177208	1.13069
2924	Dync2i2	0.322869	0.490974	1.02225	0.228144	1.17133	0.0744553	1.1281	1.91724	0.315198	1.24418	0.0412739	1.38432	-2.20795	0.247196	1.1869
7458	Spast	0.412046	0.385054	0.843782	0.149375	1.10909	0.0165888	1.78018	2.69608	0.327761	1.25506	0.0412755	1.38431	-2.20793	0.197668	1.14684
6882	Cyb5r1	0.394743	0.403685	0.876188	0.140182	1.10204	0.0481187	1.31769	2.15171	0.246541	1.18636	0.0412837	1.38422	-2.20783	0.176609	1.13022
6145	Cep41	0.126579	0.89764	1.61761	0.287847	1.22082	0.0295615	1.52927	2.40454	0.428488	1.34582	0.0412929	1.38412	-2.20771	0.274203	1.20933
1942	Tra2b	0.75754	0.120594	0.31441	0.0864843	1.06178	0.133405	0.874828	1.58682	0.179694	1.13264	0.0413745	1.38327	-2.20671	0.183029	1.13526
3025	Gng7	0.448873	0.347876	0.77764	0.101893	1.07318	0.473735	0.324465	0.734899	0.0853377	1.06094	0.0414251	1.38274	-2.20609	0.184951	1.13678
5792	Ttc1	0.366392	0.436054	0.931408	0.131407	1.09536	0.0990197	1.00428	1.75862	0.161938	1.11879	0.0415075	1.38187	-2.20508	0.138126	1.10047
187	Chd3	0.938055	0.0277717	0.0790281	0.0917357	1.06565	0.0966742	1.01469	1.77216	0.227445	1.17076	0.0415098	1.38185	-2.20505	0.217042	1.16235
6037	Nampt	0.583337	0.23408	0.560616	0.0836669	1.05971	0.0282531	1.54893	2.42766	0.178466	1.13168	0.0415321	1.38162	-2.20478	0.11936	1.08625
5719	Golm1	0.311897	0.505989	1.04651	0.311986	1.24142	0.945623	0.0242818	0.0693548	0.0116135	1.00808	0.0415351	1.38158	-2.20474	0.29469	1.22662
7156	Tm9sf3	0.169698	0.770322	1.44257	0.200678	1.14924	0.0277828	1.55622	2.43622	0.228106	1.1713	0.0415484	1.38145	-2.20458	0.1443	1.10519
2280	Rela	0.298095	0.525646	1.07793	0.158968	1.11649	0.0497609	1.30311	2.13399	0.247911	1.18749	0.0415698	1.38122	-2.20432	0.176287	1.12997
3471	U2surp	0.47855	0.320073	0.726781	0.133826	1.0972	0.0147302	1.83179	2.75524	0.271198	1.20681	0.041577	1.38115	-2.20423	0.162415	1.11916
1439	Vps26a	0.390488	0.408393	0.884302	0.101677	1.07302	0.00368697	2.43333	3.43454	0.310973	1.24054	0.0415775	1.38114	-2.20423	0.16056	1.11772
4567	Orai1	0.301524	0.520678	1.07003	0.104809	1.07535	0.346381	0.460447	0.972175	0.100658	1.07226	0.0416341	1.38055	-2.20353	0.156139	1.1143
2204	Rab33a	0.489267	0.310454	0.708886	0.131322	1.0953	0.229377	0.639451	1.25303	0.205915	1.15342	0.0417096	1.37976	-2.20261	0.251617	1.19054
7496	Zranb2	0.284823	0.545425	1.10917	0.240363	1.18129	0.0219368	1.65883	2.55597	0.469994	1.3851	0.0417633	1.37921	-2.20196	0.289052	1.22184
758	Pdlim3	0.255793	0.592111	-1.18151	-1.45837	0.363905	0.124082	0.90629	-1.62922	-1.8597	0.275534	0.0418128	1.37869	2.20136	-1.67999	0.312084
7742	Aldh18a1	0.541352	0.26652	0.625017	0.0933018	1.06681	0.104351	0.981505	1.72888	0.149359	1.10908	0.0418151	1.37867	-2.20133	0.133116	1.09666
6746	Rpap3	0.305017	0.515677	1.06204	0.13213	1.09591	0.0135673	1.86751	2.79605	0.240525	1.18142	0.0418629	1.37817	-2.20075	0.139076	1.1012
2284	Cdk16	0.393753	0.404776	0.878071	0.13593	1.0988	0.0182667	1.73834	2.64793	0.270439	1.20618	0.0418938	1.37785	-2.20037	0.164241	1.12058
5584	Nprl3	0.955966	0.0195576	0.0561468	0.071006	1.05045	0.1816	0.740884	1.40087	0.146624	1.10698	0.0419676	1.37709	-2.19948	0.178267	1.13152
5083	Unc5b	0.0621371	1.20665	2.01547	0.351403	1.2758	0.115502	0.93741	1.67073	0.219917	1.16467	0.0419787	1.37697	-2.19935	0.196313	1.14577
3418	Cyp4x1	0.844205	0.0735522	0.199951	0.0432347	1.03042	0.347603	0.458916	0.969638	0.0952999	1.06829	0.0421073	1.37564	-2.19779	0.167293	1.12295
7323	Pnkp	0.329394	0.482284	1.0081	0.142381	1.10373	0.0527501	1.27778	2.10306	0.16027	1.1175	0.0421978	1.37471	-2.1967	0.11543	1.0833
7347	Tmub1	0.191616	0.717568	1.36748	0.490914	1.40534	0.0539607	1.26792	2.091	0.702221	1.62701	0.04221	1.37458	-2.19655	0.50185	1.41603
3413	Togaram1	0.520179	0.283847	0.658529	0.107408	1.07729	0.320864	0.493679	1.02664	0.120943	1.08745	0.0422352	1.37433	-2.19625	0.183429	1.13558
2386	Phactr1	0.807272	0.0929801	0.248297	0.085483	1.06104	0.0545912	1.26288	2.08481	0.22475	1.16857	0.0422796	1.37387	-2.19571	0.177529	1.13094
4637	Ttc39b	0.412922	0.384132	0.842164	0.156321	1.11444	0.03552	1.44953	2.31015	0.282762	1.21652	0.042331	1.37334	-2.1951	0.190498	1.14116
4128	Katnb1	0.699291	0.155342	0.393771	0.0765807	1.05452	0.197947	0.703451	1.3471	0.112813	1.08133	0.0423364	1.37329	-2.19503	0.133188	1.09671
6182	Nsmce3	0.150863	0.821418	1.51379	0.214459	1.16027	0.0926093	1.03335	1.79631	0.212595	1.15877	0.0423824	1.37281	-2.19448	0.173781	1.12801
3880	Rpap1	0.479127	0.319549	0.725811	0.274763	1.2098	0.074985	1.12503	1.91335	0.513979	1.42798	0.0424633	1.37199	-2.19351	0.410608	1.32925
4105	Svop	0.427755	0.368805	0.815123	0.0831397	1.05932	0.018486	1.73316	2.64196	0.277263	1.21189	0.0424633	1.37199	-2.19351	0.168965	1.12425
1902	Eef1a2	0.843464	0.0739335	0.200915	0.0896347	1.0641	0.145003	0.838622	1.53747	0.13663	1.09933	0.0424681	1.37194	-2.19345	0.145633	1.10622
3765	Brd2	0.268089	0.57172	1.15015	0.244358	1.18457	0.0270496	1.56784	2.44985	0.392759	1.3129	0.0425162	1.37145	-2.19287	0.247971	1.18754
7760	Arih1	0.393104	0.405492	0.879306	0.0725254	1.05156	0.0024484	2.61112	3.63409	0.260898	1.19822	0.0425873	1.37072	-2.19202	0.130196	1.09444
3686	Tha1	0.354928	0.44986	0.954568	0.142091	1.1035	0.0423461	1.37319	2.21881	0.232652	1.17499	0.0426769	1.36981	-2.19095	0.160346	1.11755
6581	Adck1	0.31087	0.50742	1.04881	0.144269	1.10517	0.0798934	1.09749	1.87847	0.272263	1.2077	0.0426866	1.36971	-2.19084	0.215482	1.16109
6962	Hmgn3	0.187955	0.725946	1.37952	0.212151	1.15841	0.22639	0.645143	1.26151	0.168691	1.12404	0.0427687	1.36887	-2.18986	0.195057	1.14477
5798	Srgap1	0.655832	0.183207	0.454706	0.0711233	1.05053	0.0229058	1.64005	2.53416	0.259275	1.19688	0.0428719	1.36783	-2.18863	0.168636	1.124
6703	Phf14	0.695572	0.157658	0.398923	0.0660035	1.04681	0.181369	0.741438	1.40166	0.266578	1.20295	0.0429097	1.36744	-2.18818	0.300459	1.23154
3526	Dhx57	0.401096	0.396752	0.864183	0.122282	1.08846	0.016327	1.78709	2.70401	0.253879	1.19241	0.042964	1.3669	-2.18754	0.151236	1.11052
2548	Prickle1	0.727453	0.138195	0.355107	0.0870621	1.0622	0.0999675	1.00014	1.75323	0.258917	1.19658	0.0429977	1.36655	-2.18714	0.23477	1.17672
3790	Ppp1r9a	0.655774	0.183246	0.454788	0.0783744	1.05583	0.120894	0.917595	1.64435	0.171615	1.12632	0.042998	1.36655	-2.18714	0.163054	1.11965
2919	Scaf1	0.922902	0.0348444	0.09842	0.277766	1.21232	0.323767	0.489768	1.02029	0.562019	1.47633	0.0430068	1.36646	-2.18703	0.947172	1.92809
1411	Rpl18	0.867824	0.0615684	-0.169298	0.0462224	1.03256	0.0297662	1.52628	2.40101	0.334778	1.26118	0.0430245	1.36628	-2.18682	0.251975	1.19084
1326	Kif3a	0.826798	0.0826005	0.222667	0.0653876	1.04637	0.0534769	1.27183	2.09579	0.175039	1.12899	0.043046	1.36607	-2.18657	0.137535	1.10002
7466	Vps29	0.526367	0.278711	0.648656	0.0902596	1.06456	0.134283	0.87198	1.58296	0.144753	1.10554	0.0431761	1.36476	-2.18503	0.138947	1.1011
5701	Cisd1	0.615846	0.210528	0.51238	0.118728	1.08578	0.0225929	1.64603	2.5411	0.336801	1.26295	0.0432396	1.36412	-2.18428	0.21664	1.16202
7296	Fmnl1	0.754491	0.122346	0.318508	0.0733274	1.05214	0.112275	0.949719	1.68704	0.131219	1.09522	0.0432596	1.36392	-2.18405	0.124043	1.08978
5591	Acot7	0.197526	0.704375	1.34844	0.097134	1.06965	0.00703216	2.15291	3.11945	0.188474	1.13956	0.0432712	1.3638	-2.18391	0.0998399	1.07165
4847	Nemf	0.654301	0.184222	0.456884	0.101716	1.07305	0.0470084	1.32782	2.16401	0.219961	1.1647	0.043336	1.36315	-2.18315	0.161955	1.1188
7290	Cnot9	0.236233	0.626659	1.23388	0.169949	1.12502	0.0969405	1.01349	1.77061	0.252241	1.19106	0.0433654	1.36286	-2.1828	0.208456	1.15545
5641	Tmem168	0.203722	0.690962	1.32896	0.401318	1.32071	0.0569421	1.24457	2.06231	0.525446	1.43938	0.0433969	1.36254	-2.18243	0.377953	1.2995
7828	Pmm2	0.518511	0.285242	0.661201	0.086362	1.06169	0.0436585	1.35993	2.20284	0.180927	1.13361	0.0434301	1.36221	-2.18204	0.128036	1.0928
6400	Cd2bp2	0.678271	0.168597	0.423037	0.0886567	1.06338	0.116659	0.93308	1.66498	0.152178	1.11125	0.043449	1.36202	-2.18182	0.143097	1.10427
6073	Ttc5	0.228309	0.641477	1.25605	0.125786	1.0911	0.0151155	1.82058	2.7424	0.226762	1.17021	0.0434763	1.36175	-2.1815	0.130813	1.09491
5985	Sfxn1	0.568527	0.245249	0.583044	0.096958	1.06952	0.0291451	1.53543	2.41179	0.238759	1.17998	0.0435554	1.36096	-2.18057	0.158283	1.11596
118	Zkscan16	0.513837	0.289174	0.668716	0.210005	1.15669	0.0511634	1.29104	2.11927	0.392767	1.31291	0.0436398	1.36012	-2.17959	0.286571	1.21974
361	Herc1	0.614268	0.211642	0.514693	0.0815854	1.05818	0.0603283	1.21948	2.03136	0.226641	1.17011	0.0436425	1.36009	-2.17955	0.17462	1.12867
5527	Lmcd1	0.584277	0.233381	0.559203	0.0779983	1.05555	0.0881056	1.055	1.82419	0.12403	1.08977	0.043644	1.36007	-2.17954	0.10475	1.07531
2889	Coil	0.993456	0.0028515	-0.00833994	0.0813508	1.05801	0.116908	0.932155	1.66375	0.28831	1.22121	0.0436498	1.36002	-2.17947	0.293811	1.22587
5307	Ntmt1	0.255176	0.593161	1.18312	0.225088	1.16885	0.445711	0.350946	0.78318	0.145982	1.10648	0.0437142	1.35938	-2.17872	0.280552	1.21466
6644	Rpl34	0.295148	0.52996	1.08478	0.197018	1.14633	0.0293017	1.53311	2.40905	0.326554	1.25401	0.0437255	1.35927	-2.17859	0.208181	1.15523
1223	Ache	0.276217	0.55875	1.13001	0.137211	1.09978	0.124939	0.903304	1.62521	0.140739	1.10247	0.0437541	1.35898	-2.17825	0.126324	1.09151
3847	Tmem94	0.372392	0.428999	0.919486	0.149382	1.10909	0.0849446	1.07086	1.84453	0.242479	1.18302	0.0437915	1.35861	-2.17782	0.195494	1.14512
4263	Sybu	0.260065	0.584918	1.17049	0.204636	1.1524	0.0750667	1.12455	1.91275	0.282845	1.21659	0.0437998	1.35853	-2.17772	0.217772	1.16294
6599	Hddc3	0.467473	0.330243	0.745531	0.257262	1.19521	0.492576	0.307527	0.703409	0.124348	1.09002	0.0439045	1.35749	-2.1765	0.278557	1.21298
4816	Acat2	0.830494	0.0806633	0.217834	0.0693347	1.04923	0.0535054	1.2716	2.09551	0.153777	1.11248	0.0439304	1.35724	-2.1762	0.120263	1.08693
5895	Lrrc59	0.290289	0.537169	1.09618	0.186762	1.13821	0.0580708	1.23604	2.05181	0.237574	1.17901	0.0439727	1.35682	-2.17571	0.172347	1.12689
4883	Nedd4l	0.309895	0.508785	1.051	0.143187	1.10434	0.0683475	1.16528	1.96394	0.223759	1.16777	0.0441532	1.35504	-2.17362	0.168839	1.12415
4553	Il33	0.202125	0.69438	1.33394	0.280659	1.21475	0.135875	0.866862	1.57602	0.276987	1.21166	0.0441936	1.35464	-2.17315	0.254128	1.19261
4383	Rab3gap2	0.370577	0.431122	0.923079	0.101291	1.07273	0.0517736	1.28589	2.11298	0.170766	1.12566	0.0442395	1.35419	-2.17262	0.121827	1.08811
7214	Kcnmb4	0.505796	0.296025	0.681737	0.132513	1.0962	0.195259	0.709389	1.35569	0.324183	1.25196	0.0442659	1.35393	-2.17232	0.359943	1.28338
5494	Snrk	0.440761	0.355797	0.791904	0.0567627	1.04013	0.1937	0.712869	1.36071	0.114118	1.08231	0.0442662	1.35393	-2.17231	0.124738	1.09031
2829	Trpm3	0.30685	0.513073	1.05788	0.146685	1.10702	0.0758573	1.12	1.90701	0.180799	1.13351	0.0442744	1.35385	-2.17222	0.1399	1.10183
925	Abl1	0.18426	0.73457	1.39186	0.214709	1.16047	0.0382556	1.41731	2.27172	0.305632	1.23596	0.0442968	1.35363	-2.17196	0.201759	1.1501
5759	Arrb2	0.290933	0.536207	1.09466	0.237402	1.17887	0.0681316	1.16665	1.96565	0.396958	1.31673	0.0443149	1.35345	-2.17175	0.298422	1.2298
4435	Cnpy4	0.461558	0.335774	0.755656	0.151959	1.11108	0.273857	0.562475	1.13581	0.169085	1.12434	0.0443439	1.35317	-2.17142	0.224004	1.16797
6744	Nop56	0.2481	0.605373	1.20173	0.175547	1.12939	0.0191578	1.71766	2.62407	0.265583	1.20212	0.0443866	1.35275	-2.17093	0.15764	1.11546
2871	Rbm27	0.332491	0.47822	1.00145	0.196714	1.14609	0.0833261	1.07922	1.85521	0.247074	1.1868	0.0444156	1.35246	-2.17059	0.196444	1.14587
5308	Nudt4	0.201529	0.695662	1.3358	0.565399	1.4798	0.0904738	1.04348	1.80938	0.699838	1.62432	0.0444258	1.35236	-2.17048	0.562655	1.47699
5943	Atad3	0.642493	0.192131	0.47376	0.095888	1.06872	0.050102	1.30015	2.13037	0.181274	1.13388	0.0444401	1.35223	-2.17031	0.134094	1.0974
2032	Pfkfb2	0.315794	0.500597	1.03782	0.119349	1.08624	0.0300855	1.52164	2.39555	0.244849	1.18497	0.0444901	1.35174	-2.16974	0.156541	1.11461
112	Focad	0.212381	0.672884	1.30253	0.167457	1.12308	0.0216553	1.66444	2.56248	0.280997	1.21503	0.0445186	1.35146	-2.16941	0.169106	1.12436
5831	Syt17	0.394408	0.404054	0.876825	0.0923636	1.06612	0.220278	0.65703	1.27915	0.115525	1.08337	0.0445418	1.35123	-2.16914	0.13332	1.09681
1784	Il1rapl1	0.346491	0.460308	0.971945	0.344206	1.26945	0.0931324	1.0309	1.79315	0.598077	1.5137	0.0445437	1.35121	-2.16912	0.491117	1.40553
4483	Ralyl	0.464002	0.33348	0.751463	0.09499	1.06806	0.0336675	1.47279	2.33779	0.29935	1.23059	0.0445555	1.3511	-2.16899	0.198922	1.14784
5352	Exoc1	0.722522	0.141149	0.361835	0.0719525	1.05114	0.0730555	1.13635	1.92763	0.151198	1.11049	0.044559	1.35106	-2.16895	0.124055	1.08979
5967	Nptxr	0.489664	0.310102	0.708229	0.116186	1.08387	0.161965	0.790578	1.47097	0.178785	1.13193	0.0446023	1.35064	-2.16845	0.181751	1.13426
2521	Pag1	0.116743	0.932768	1.66456	0.231795	1.17429	0.0259812	1.58534	2.47034	0.307027	1.23716	0.0446387	1.35029	-2.16803	0.189593	1.14044
6806	Lin37	0.0274772	1.56103	2.44186	1.67592	3.19524	0.00551507	2.25845	3.2382	2.39486	5.25926	0.0446719	1.34997	-2.16765	1.25616	2.3886
930	Gm10881	0.109527	0.96048	1.70125	1.00081	2.00112	0.37361	0.427582	0.917082	0.618826	1.53562	0.0447784	1.34893	-2.16644	0.994496	1.99238
1763	Dnajc30	0.131847	0.879929	1.59373	1.22298	2.33428	0.634091	0.197848	0.485855	0.325624	1.25321	0.0448444	1.34829	-2.16569	1.03357	2.04708
2013	Pip5k1a	0.2559	0.591929	1.18123	0.150223	1.10974	0.126591	0.897596	1.61755	0.172096	1.12669	0.0450115	1.34668	-2.16378	0.15383	1.11252
4241	Pgs1	0.639216	0.194352	0.478468	0.0840317	1.05998	0.0844883	1.0732	1.84752	0.188069	1.13924	0.0450688	1.34612	-2.16313	0.157284	1.11519
5051	Rtn4rl1	0.397444	0.400724	0.871068	0.125051	1.09055	0.0635292	1.19703	2.00352	0.19868	1.14765	0.0451321	1.34551	-2.16242	0.148216	1.1082
101	Virma	0.195943	0.70787	1.3535	0.228876	1.17192	0.0797176	1.09845	1.87969	0.299998	1.23114	0.045174	1.34511	-2.16194	0.232044	1.1745
2301	Eml1	0.0822676	1.08477	1.86229	0.194249	1.14413	0.0128033	1.89268	2.82477	0.25997	1.19745	0.0452676	1.34421	-2.16088	0.145715	1.10628
3465	Fbxo41	0.930828	0.0311308	-0.0882728	0.0167523	1.01168	0.0890344	1.05044	1.81834	0.182666	1.13498	0.0452752	1.34414	-2.1608	0.171484	1.12622
1670	Galc	0.165288	0.781759	1.45863	0.381866	1.30303	0.0836059	1.07776	1.85335	0.439645	1.35627	0.0452949	1.34395	-2.16058	0.344098	1.26936
2309	Clu	0.497317	0.303367	0.695598	0.0801252	1.05711	0.0837374	1.07708	1.85248	0.185675	1.13735	0.0453062	1.34384	-2.16045	0.150737	1.11014
1480	Crebbp	0.207809	0.682337	1.31638	0.26893	1.20491	0.0310317	1.5082	2.37969	0.457547	1.37321	0.045375	1.34318	-2.15967	0.289973	1.22262
7527	Syt5	0.827062	0.082462	0.222322	0.0695501	1.04939	0.136737	0.864115	1.57228	0.209464	1.15626	0.0454732	1.34224	-2.15856	0.212808	1.15894
6250	Spg21	0.332731	0.477907	1.00094	0.233421	1.17562	0.073771	1.13211	1.92229	0.368487	1.291	0.0456527	1.34053	-2.15655	0.281923	1.21581
4040	Znf598	0.509179	0.29313	0.676245	0.12983	1.09416	0.0864088	1.06344	1.83503	0.258902	1.19657	0.0456709	1.34036	-2.15635	0.212004	1.1583
2691	Cdc42bpa	0.253759	0.595578	1.18681	0.0969368	1.0695	0.0788933	1.10296	1.88542	0.124371	1.09003	0.0456948	1.34013	-2.15608	0.0960157	1.06882
4350	Plcxd3	0.450319	0.34648	0.775115	0.116633	1.0842	0.109317	0.961313	1.70235	0.154039	1.11268	0.0457069	1.34002	-2.15594	0.13396	1.0973
3725	Spcs3	0.2759	0.559249	1.13079	0.177719	1.13109	0.324058	0.489378	1.01965	0.13638	1.09914	0.0457844	1.33928	-2.15507	0.195105	1.14481
6084	Cdk5rap3	0.283321	0.547721	1.11277	0.220841	1.16541	0.149741	0.824659	1.51826	0.221346	1.16582	0.0458406	1.33875	-2.15445	0.210041	1.15672
6559	Arpin	0.349176	0.456955	0.966383	0.112201	1.08088	0.0234092	1.63061	2.52317	0.237565	1.179	0.0458413	1.33874	-2.15444	0.145658	1.10623
378	Arid1b	0.566596	0.246726	0.585989	0.0941619	1.06745	0.107092	0.970242	1.7141	0.159476	1.11688	0.0458611	1.33856	-2.15422	0.140467	1.10226
2036	Surf6	0.41499	0.381962	0.838357	0.968472	1.95677	0.0933568	1.02985	1.7918	1.42996	2.69439	0.0459439	1.33777	-2.15329	1.1773	2.26154
211	Phf3	0.432222	0.364293	0.807099	0.164002	1.12039	0.070943	1.14909	1.94365	0.272172	1.20762	0.0459603	1.33762	-2.15311	0.208666	1.15562
4548	Rspry1	0.375771	0.425077	0.91283	0.149021	1.10882	0.286856	0.542337	1.10432	0.133543	1.09698	0.0459858	1.33738	-2.15283	0.177704	1.13108
2051	Tank	0.0899164	1.04616	1.81284	0.27702	1.21169	0.0429486	1.36705	2.21142	0.309381	1.23918	0.0460129	1.33712	-2.15252	0.208312	1.15534
3770	Pank2	0.349454	0.456611	0.96581	0.0902511	1.06456	0.0744043	1.1284	1.91761	0.187078	1.13846	0.0460424	1.33684	-2.1522	0.143446	1.10454
5380	Dusp15	0.467958	0.329794	0.744706	0.137318	1.09986	0.487412	0.312104	0.711967	0.0847615	1.06051	0.046074	1.33654	-2.15185	0.184423	1.13636
572	Ncam2	0.975969	0.010564	-0.0306294	0.0371202	1.02606	0.101335	0.994239	1.74554	0.148389	1.10833	0.0461339	1.33598	-2.15118	0.142319	1.10368
5450	Sgsm3	0.709029	0.149336	0.380334	0.224943	1.16873	0.365966	0.43656	0.93226	0.308162	1.23813	0.0461849	1.3355	-2.15061	0.527057	1.44099
4688	Sowahc	0.333149	0.477362	1.00005	0.200984	1.14948	0.23126	0.6359	1.24772	0.171948	1.12658	0.0462695	1.33471	-2.14968	0.199703	1.14846
3763	Try10	0.0155605	1.80798	2.72796	2.38952	5.23982	0.0391858	1.40687	2.25924	2.17206	4.50665	0.0462708	1.33469	-2.14966	1.52569	2.87925
35	Mlh3	0.137554	0.861526	1.56876	1.50136	2.83109	0.366297	0.436167	0.931598	0.869929	1.82757	0.0463055	1.33437	-2.14928	1.35861	2.56438
2205	Scn1b	0.247042	0.607229	1.20454	0.226893	1.17031	0.0788892	1.10298	1.88545	0.317582	1.24624	0.0463183	1.33425	-2.14914	0.244285	1.18451
4355	Slc7a4	0.279038	0.554337	1.12313	1.48871	2.80637	0.101731	0.992548	1.74333	2.13067	4.37922	0.046319	1.33424	-2.14913	1.76561	3.40019
234	Scaper	0.903774	0.04394	-0.122956	0.0449323	1.03163	0.0451342	1.34549	2.1854	0.179114	1.13219	0.0463193	1.33424	-2.14912	0.141726	1.10322
6476	Gar1	0.268971	0.570294	1.14794	0.284803	1.21824	0.0344073	1.46335	2.32658	0.415866	1.3341	0.0463611	1.33385	-2.14866	0.268255	1.20435
5529	Gramd1a	0.999616	0.000166764	-0.000489245	0.0457447	1.03222	0.0925311	1.03371	1.79679	0.185457	1.13718	0.0463891	1.33358	-2.14835	0.171515	1.12624
3805	Trim46	0.240051	0.619697	1.2234	0.143594	1.10465	0.0331642	1.47933	2.34554	0.200249	1.1489	0.0464331	1.33317	-2.14787	0.127996	1.09277
3600	Dync1li2	0.32045	0.49424	1.02754	0.137548	1.10003	0.0737687	1.13213	1.92231	0.196959	1.14628	0.0464728	1.3328	-2.14743	0.14984	1.10945
3910	Dnajc6	0.587313	0.231131	0.554646	0.0816754	1.05825	0.030942	1.50945	2.38117	0.199981	1.14868	0.0465285	1.33228	-2.14682	0.132187	1.09595
2819	Iqsec2	0.946778	0.0237518	-0.0678794	0.0281609	1.01971	0.165749	0.780549	1.45693	0.174019	1.1282	0.0465809	1.33179	-2.14624	0.201616	1.14999
1822	Fgf1	0.174748	0.757589	1.42459	0.191695	1.1421	0.0701304	1.15409	1.94993	0.222592	1.16683	0.0467057	1.33063	-2.14487	0.165335	1.12143
7171	Nherf2	0.743872	0.128502	0.332826	0.0560756	1.03963	0.132161	0.878897	1.59233	0.0993502	1.07129	0.0467989	1.32976	-2.14384	0.0969093	1.06948
2293	Mark2	0.612351	0.213	0.517505	0.064173	1.04549	0.0543324	1.26494	2.08735	0.204366	1.15218	0.0468305	1.32947	-2.1435	0.150943	1.11029
2513	Entpd6	0.048095	1.3179	2.15197	0.81064	1.75399	0.0750169	1.12484	1.91312	0.713915	1.64025	0.0468755	1.32905	-2.14301	0.553483	1.46762
7463	Igbp1b	0.119012	0.92441	1.65344	1.06215	2.08804	0.259246	0.586287	1.17259	0.720761	1.64805	0.046943	1.32843	-2.14227	0.881721	1.84257
6204	Gid4	0.26389	0.578577	1.16073	0.104548	1.07516	0.126569	0.897671	1.61765	0.135216	1.09826	0.0469836	1.32805	-2.14182	0.119696	1.08651
1849	Lpar1	0.0372612	1.42874	2.28538	0.319198	1.24764	0.0410073	1.38714	2.23558	0.264339	1.20109	0.04704	1.32753	-2.14121	0.180085	1.13295
5596	Nrbp2	0.394875	0.40354	0.875938	0.0825614	1.0589	0.0230717	1.63692	2.53051	0.192903	1.14306	0.0470805	1.32716	-2.14077	0.117995	1.08523
4784	Kctd12b	0.240365	0.619129	1.22254	0.297541	1.22905	0.494941	0.305447	0.699507	0.12262	1.08871	0.0471059	1.32692	-2.14049	0.260207	1.19765
6959	Mrps15	0.367951	0.43421	0.928298	0.144332	1.10522	0.129424	0.887985	1.60461	0.218486	1.16351	0.0471873	1.32617	-2.1396	0.197003	1.14631
3052	Spin1	0.463474	0.333975	0.752368	0.121338	1.08774	0.0704087	1.15237	1.94777	0.192407	1.14267	0.0471965	1.32609	-2.1395	0.146961	1.10723
4519	Hook3	0.323918	0.489564	1.01996	0.113248	1.08166	0.0417611	1.37923	2.22607	0.195855	1.1454	0.0472053	1.32601	-2.13941	0.131083	1.09512
4293	Dlgap2	0.962614	0.0165477	0.0476621	0.0146576	1.01021	0.0487766	1.31179	2.14454	0.227126	1.1705	0.0472198	1.32588	-2.13925	0.175732	1.12954
7822	Fkbp1b	0.545334	0.263337	0.618796	0.0601184	1.04255	0.0337547	1.47167	2.33646	0.203436	1.15144	0.0472575	1.32553	-2.13884	0.135048	1.09813
742	Ilk	0.321692	0.49256	1.02482	0.246979	1.18672	0.173506	0.760685	1.42897	0.21759	1.16279	0.0472623	1.32549	-2.13879	0.218516	1.16354
6179	Rpl17	0.584828	0.232972	0.558374	0.10169	1.07303	0.0774985	1.11071	1.89524	0.189694	1.14052	0.0472714	1.3254	-2.13869	0.151458	1.11069
2567	Ube2z	0.0112278	1.94971	-2.88965	-0.39863	0.758578	0.0680069	1.16745	-1.96665	-0.332709	0.794044	0.0473269	1.32489	2.13809	-0.268291	0.830302
2913	Rabl6	0.312678	0.504903	1.04476	0.155301	1.11365	0.0379655	1.42061	2.27567	0.233917	1.17602	0.0473603	1.32459	-2.13772	0.153502	1.11227
4498	Exosc6	0.469813	0.328075	0.741547	0.143545	1.10462	0.0465351	1.33222	2.16934	0.247319	1.187	0.047418	1.32406	-2.1371	0.172185	1.12676
2525	Uevld	0.232539	0.633504	1.24414	0.0916699	1.0656	0.0462182	1.33519	2.17293	0.161056	1.11811	0.0474196	1.32404	-2.13708	0.108919	1.07842
4013	Wnk3	0.824893	0.0836023	0.22516	0.0593668	1.04201	0.00859795	2.06561	3.02095	0.314342	1.24344	0.0474457	1.3238	-2.1368	0.181586	1.13413
1908	Ap2s1	0.401735	0.396061	0.862983	0.0762135	1.05425	0.0194403	1.7113	2.61673	0.219969	1.16471	0.0474511	1.32375	-2.13674	0.131204	1.09521
3544	Pcnp	0.259589	0.585714	1.17171	0.117604	1.08493	0.0506417	1.29549	2.1247	0.151284	1.11056	0.0475042	1.32327	-2.13617	0.104406	1.07505
305	Rbm24	0.150255	0.823172	1.51621	0.343503	1.26883	0.0952066	1.02133	1.78077	0.350367	1.27489	0.0475708	1.32266	-2.13545	0.281518	1.21547
5387	Crtac1	0.650547	0.186721	0.462234	0.083274	1.05942	0.0519269	1.28461	2.11142	0.205345	1.15296	0.0476656	1.3218	-2.13443	0.150525	1.10997
3814	Fam185a	0.310147	0.508433	1.05044	0.17346	1.12776	0.064571	1.18996	1.99474	0.285714	1.21901	0.0477587	1.32095	-2.13342	0.208826	1.15575
6920	Armc8	0.656941	0.182473	0.453129	0.0477905	1.03368	0.17243	0.763388	1.43279	0.109412	1.07879	0.0477711	1.32083	-2.13329	0.115739	1.08353
2505	Esyt2	0.429657	0.366878	0.8117	0.116422	1.08404	0.0522046	1.28229	2.10859	0.168477	1.12387	0.0478182	1.32041	-2.13278	0.11917	1.08611
6431	Hnrnpa0	0.342238	0.465672	0.98082	0.180993	1.13366	0.372092	0.429349	0.920078	0.111417	1.08029	0.0478236	1.32036	-2.13273	0.177285	1.13075
2437	Lpcat1	0.512402	0.290389	0.67103	0.104199	1.0749	0.107367	0.969129	1.71264	0.187692	1.13894	0.0478442	1.32017	-2.1325	0.162014	1.11885
4999	Hmgcs1	0.150249	0.823188	1.51623	0.219946	1.16469	0.00698052	2.15611	3.12306	0.4043	1.32345	0.0479961	1.31879	-2.13087	0.209209	1.15605
2523	Brms1l	0.108221	0.96569	1.70811	0.63116	1.54881	0.0572281	1.24239	2.05964	0.660307	1.58042	0.0481028	1.31783	-2.12973	0.4665	1.38175
1660	Cacnb3	0.272588	0.564493	1.13895	0.169304	1.12452	0.0260181	1.58472	2.46962	0.308559	1.23847	0.0481551	1.31736	-2.12918	0.188607	1.13966
2897	Tbc1d9b	0.132609	0.877428	1.59034	0.166365	1.12223	0.0275315	1.56017	2.44085	0.200229	1.14888	0.0482006	1.31695	-2.12869	0.122771	1.08882
7431	Add1	0.51336	0.289578	0.669485	0.11956	1.0864	0.0666968	1.1759	1.9772	0.23009	1.17291	0.0482009	1.31694	-2.12869	0.173873	1.12808
7090	Tfcp2	0.369698	0.432152	0.924822	0.115638	1.08345	0.101257	0.994574	1.74597	0.179021	1.13212	0.0482185	1.31679	-2.1285	0.148218	1.1082
7515	Acox1	0.124777	0.903867	1.62597	0.178291	1.13154	0.0665458	1.17688	1.97843	0.174333	1.12844	0.0482436	1.31656	-2.12823	0.127222	1.09219
121	Plch2	0.262187	0.581388	1.16506	0.11056	1.07965	0.060188	1.22049	2.03261	0.167196	1.12287	0.0483368	1.31572	-2.12724	0.11936	1.08625
7030	Xpo7	0.306943	0.512943	1.05767	0.108255	1.07792	0.0247802	1.6059	2.49436	0.221745	1.16614	0.0483796	1.31534	-2.12678	0.134853	1.09798
1910	Hpcal1	0.705674	0.151396	0.384955	0.132307	1.09604	0.107307	0.969372	1.71296	0.252007	1.19086	0.0483813	1.31532	-2.12677	0.224866	1.16867
6815	Hm13	0.225855	0.646171	1.26304	0.128268	1.09298	0.0358336	1.44571	2.30561	0.213695	1.15965	0.0483819	1.31532	-2.12676	0.137091	1.09969
132	Ppip5k1	0.428511	0.368038	0.813762	0.111962	1.0807	0.0449628	1.34715	2.1874	0.223389	1.16747	0.0484046	1.31511	-2.12652	0.152784	1.11171
7134	Xpo4	0.167335	0.776414	1.45113	0.254413	1.19285	0.0946516	1.02387	1.78406	0.298388	1.22977	0.0484176	1.315	-2.12638	0.238273	1.17958
2456	Smarca4	0.565702	0.247412	0.587356	0.109896	1.07915	0.130837	0.88327	1.59824	0.18693	1.13834	0.0484371	1.31482	-2.12617	0.17348	1.12778
5292	Phospho1	0.169873	0.769876	1.44194	0.135814	1.09871	0.0493963	1.30631	2.13787	0.163585	1.12007	0.0484708	1.31452	-2.12581	0.111349	1.08024
3398	Hbs1l	0.254055	0.595073	1.18604	0.115786	1.08357	0.0278514	1.55515	2.43496	0.206094	1.15356	0.0484764	1.31447	-2.12576	0.126938	1.09197
4844	Macroh2a2	0.647366	0.18885	0.466778	0.169531	1.12469	0.188089	0.725636	1.37907	0.276348	1.21113	0.0485257	1.31403	-2.12523	0.301929	1.23279
4774	Cfap410	0.0911124	1.04042	1.80544	1.17661	2.26045	0.360488	0.44311	0.943272	0.644858	1.56359	0.0485655	1.31367	-2.12481	0.989633	1.98568
5663	Hdac11	0.189505	0.722379	1.3744	0.156755	1.11478	0.076889	1.11414	1.89959	0.192269	1.14256	0.0485958	1.3134	-2.12449	0.144913	1.10566
3273	Tfe3	0.205664	0.686841	-1.32296	-0.951549	0.517077	0.00702671	2.15325	-3.11983	-2.19509	0.218379	0.0485981	1.31338	2.12447	-1.13701	0.454701
3539	Polr2m	0.477932	0.320634	0.72782	0.103066	1.07405	0.381796	0.418169	0.901061	0.0972664	1.06974	0.0486315	1.31308	-2.12411	0.161198	1.11822
3284	Btf3	0.127277	0.895251	1.61439	0.143315	1.10444	0.0160124	1.79554	2.7137	0.223828	1.16783	0.0486338	1.31306	-2.12409	0.126725	1.09181
416	Akap6	0.12877	0.890185	-1.60757	-1.7898	0.289212	0.148263	0.828966	-1.5242	-1.74383	0.298575	0.048675	1.31269	2.12365	-1.61957	0.325432
2949	Myl6	0.562067	0.250212	0.592921	0.129393	1.09383	0.0758908	1.11981	1.90676	0.255835	1.19403	0.0487616	1.31192	-2.12274	0.200691	1.14925
574	Terf2	0.341749	0.466292	0.981843	0.151307	1.11058	0.0173431	1.76087	2.67388	0.295349	1.22718	0.0487646	1.31189	-2.1227	0.171189	1.12599
5839	Als2	0.415429	0.381503	0.83755	0.098861	1.07093	0.0479243	1.31944	2.15384	0.192966	1.14311	0.0487871	1.3117	-2.12247	0.13318	1.09671
4762	Nadk2	0.198496	0.702247	1.34536	0.196207	1.14568	0.0520393	1.28367	2.11027	0.26853	1.20458	0.0487947	1.31163	-2.12239	0.184606	1.13651
2892	Luc7l3	0.86255	0.0642157	0.176127	0.0451779	1.03181	0.17017	0.769117	1.44087	0.121401	1.08779	0.0488007	1.31157	-2.12232	0.132978	1.09655
6756	Armc1	0.436795	0.359722	0.798937	0.0748021	1.05322	0.240133	0.619548	1.22317	0.0808125	1.05761	0.0488875	1.3108	-2.12141	0.095841	1.06869
4529	Timmdc1	0.305298	0.515277	1.0614	0.290474	1.22304	0.158711	0.799392	1.48326	0.366782	1.28947	0.0489254	1.31047	-2.12101	0.351145	1.27557
1583	Arsa	0.223251	0.651207	1.27053	0.13585	1.09874	0.388071	0.411089	0.888936	0.0938493	1.06721	0.0489499	1.31025	-2.12075	0.151909	1.11104
5080	Pnpt1	0.362092	0.441181	0.940035	0.089308	1.06386	0.0617654	1.20925	2.0187	0.157674	1.11549	0.0489835	1.30995	-2.1204	0.114053	1.08226
2200	Rbbp6	0.403443	0.394218	0.85978	0.154653	1.11315	0.0588045	1.23059	2.04509	0.259534	1.19709	0.0490473	1.30938	-2.11973	0.186577	1.13806
5753	Ipo9	0.355404	0.449278	0.953595	0.0919929	1.06584	0.0358037	1.44607	2.30604	0.178639	1.13182	0.0491333	1.30862	-2.11883	0.115589	1.08342
1311	Camk2b	0.699186	0.155407	0.393916	0.0357179	1.02507	0.329801	0.481748	1.00722	0.123011	1.08901	0.0491503	1.30847	-2.11865	0.18886	1.13986
2452	Aamp	0.2991	0.524184	1.07561	0.142078	1.10349	0.102061	0.991139	1.74149	0.191792	1.14218	0.0491711	1.30829	-2.11843	0.157119	1.11506
6094	Lias	0.227657	0.642719	1.2579	0.194685	1.14447	0.208502	0.680889	1.31426	0.163239	1.1198	0.0491882	1.30814	-2.11825	0.175075	1.12902
541	Cyth3	0.489141	0.310566	0.709096	0.108683	1.07824	0.0715761	1.14523	1.9388	0.193071	1.14319	0.0492778	1.30735	-2.11731	0.147047	1.1073
1078	App	0.216197	0.665151	1.29115	0.120709	1.08727	0.011514	1.93877	2.87723	0.250361	1.1895	0.0493152	1.30702	-2.11692	0.136153	1.09897
4404	Tcaf1	0.677436	0.169132	0.424207	0.0965331	1.0692	0.179659	0.74555	1.40751	0.177794	1.13115	0.0493361	1.30684	-2.11671	0.190489	1.14115
1632	Efnb2	0.560282	0.251594	-0.595663	-0.000777538	0.999461	0.0291608	1.5352	2.41151	0.242742	1.18324	0.0493391	1.30681	-2.11668	0.191941	1.1423
4235	Fut11	0.897972	0.0467374	0.130414	0.0600996	1.04254	0.178978	0.7472	1.40986	0.129836	1.09417	0.0493634	1.3066	-2.11642	0.146208	1.10666
3428	Brinp2	0.587565	0.230944	0.554267	0.10835	1.07799	0.0380449	1.4197	2.27459	0.274195	1.20932	0.0494125	1.30616	-2.11591	0.185176	1.13696
6273	Pih1d1	0.341876	0.466132	0.981578	0.216777	1.16213	0.262514	0.580848	1.16423	0.20139	1.14981	0.0494266	1.30604	-2.11576	0.247166	1.18687
3083	Acvr1b	0.419331	0.377443	0.830406	0.102059	1.0733	0.057322	1.24168	2.05876	0.278619	1.21303	0.0495166	1.30525	-2.11482	0.199125	1.148
5547	Or1e19	0.714835	0.145794	0.372357	0.103908	1.07468	0.991221	0.00382972	0.0111885	0.00429573	1.00298	0.0495602	1.30487	-2.11437	0.707841	1.63336
2429	Faf2	0.497451	0.303249	0.695377	0.147993	1.10803	0.091094	1.04051	1.80556	0.26817	1.20428	0.0496285	1.30427	-2.11366	0.217692	1.16287
1932	Rpl30	0.284568	0.545814	1.10978	0.331264	1.25812	0.455661	0.341358	0.765829	0.219194	1.16408	0.0496304	1.30425	-2.11364	0.417268	1.3354
3859	Nacc1	0.683717	0.165124	0.415419	0.0994068	1.07133	0.232703	0.633199	1.24368	0.158274	1.11595	0.0496437	1.30414	-2.1135	0.192661	1.14287
5205	Ahsa2	0.440527	0.356027	0.792317	0.10246	1.0736	0.0976061	1.01052	1.76675	0.17781	1.13117	0.0496589	1.304	-2.11335	0.145956	1.10646
7175	Nrip2	0.251634	0.59923	1.19238	0.167993	1.12349	0.0592499	1.22731	2.04104	0.280082	1.21426	0.0496807	1.30381	-2.11312	0.197836	1.14698
2616	Arhgap17	0.502071	0.299235	0.687809	0.203959	1.15186	0.139047	0.85684	1.56238	0.286044	1.21929	0.0496885	1.30374	-2.11304	0.26649	1.20288
120	Syndig1	0.100001	0.999997	1.75305	0.311666	1.24114	0.183308	0.736818	1.39507	0.231365	1.17395	0.0496926	1.30371	-2.113	0.234649	1.17662
3250	Eif4g2	0.672125	0.17255	0.431665	0.0855961	1.06113	0.0588853	1.22999	2.04435	0.173505	1.1278	0.0497493	1.30321	-2.11241	0.129812	1.09415
4242	Nrdc	0.323617	0.489969	1.02061	0.136505	1.09924	0.037156	1.42997	2.28685	0.209382	1.15619	0.0497826	1.30292	-2.11206	0.135483	1.09846
5978	Psmd6	0.539785	0.267779	0.627472	0.0923535	1.06611	0.102137	0.990815	1.74106	0.171962	1.12659	0.0498243	1.30256	-2.11163	0.145248	1.10592
6028	Cmas	0.378164	0.42232	0.90814	0.144919	1.10567	0.0563125	1.24939	2.06826	0.229981	1.17282	0.0499479	1.30148	-2.11035	0.162501	1.11923
6329	Ier3ip1	0.275887	0.559269	1.13082	0.232182	1.17461	0.0684406	1.16469	1.9632	0.260855	1.19819	0.049972	1.30127	-2.1101	0.190659	1.14129
4572	Vps35l	0.424449	0.372174	0.821097	0.104346	1.07501	0.0848728	1.07123	1.845	0.174806	1.12881	0.0500316	1.30076	-2.10949	0.137323	1.09986
249	Tmem229a	0.098358	1.00719	1.76241	0.238375	1.17966	0.0752273	1.12362	1.91158	0.241747	1.18242	0.0500387	1.30069	-2.10942	0.18122	1.13384
5642	Kdm4b	0.110124	0.958116	1.69813	0.586491	1.50159	0.651677	0.185968	0.460623	0.170631	1.12555	0.0500497	1.3006	-2.1093	0.556706	1.47091
6609	Mrpl28	0.336327	0.473238	0.99328	0.192742	1.14293	0.0999581	1.00018	1.75329	0.236376	1.17803	0.0500637	1.30048	-2.10916	0.192346	1.14262
4292	Tdp1	0.065301	1.18508	1.98866	1.71247	3.27722	0.887377	0.051892	-0.144052	-0.120792	0.919683	0.0501458	1.29977	-2.10831	1.42037	2.67654
5223	Gspt1	0.0992614	1.00322	1.75724	0.137756	1.10019	0.0172004	1.76446	2.67801	0.204573	1.15235	0.0501656	1.29959	-2.10811	0.11646	1.08407
600	Exoc4	0.640982	0.193154	0.47593	0.0575316	1.04068	0.0576344	1.23932	2.05585	0.147258	1.10746	0.0502485	1.29888	-2.10726	0.108733	1.07828
2313	Serpine2	0.603575	0.219269	0.530435	0.0507775	1.03582	0.0135056	1.86949	2.79831	0.182074	1.13451	0.0502645	1.29874	-2.10709	0.105241	1.07567
5621	Wdr45	0.857134	0.0669511	0.183148	0.0780222	1.05557	0.0870273	1.06034	1.83106	0.190891	1.14147	0.0502749	1.29865	-2.10699	0.163365	1.1199
1582	Sts	0.36866	0.433374	0.926886	0.241002	1.18181	0.205529	0.687126	1.32337	0.201452	1.14986	0.0503016	1.29842	-2.10671	0.216321	1.16177
1453	Eci1	0.563313	0.249251	0.591012	0.10538	1.07578	0.0654559	1.18405	1.98738	0.192871	1.14304	0.0503418	1.29807	-2.1063	0.144653	1.10546
4164	Slc35f1	0.285913	0.543766	1.10657	0.155502	1.11381	0.0410523	1.38666	2.23501	0.306175	1.23643	0.0503615	1.2979	-2.1061	0.200497	1.14909
68	Zmym4	0.884554	0.0532758	0.147691	0.0570548	1.04034	0.11087	0.955187	1.69427	0.266411	1.20281	0.0504664	1.297	-2.10503	0.246818	1.18659
6416	Pin4	0.473391	0.32478	0.735481	0.12683	1.09189	0.0886078	1.05253	1.82102	0.18236	1.13474	0.050494	1.29676	-2.10474	0.145671	1.10625
1390	Htr2a	0.347226	0.459387	-0.97042	-0.31929	0.801464	0.450055	0.346735	0.775577	0.317822	1.24645	0.0505644	1.29616	-2.10402	0.934623	1.91139
3145	Atrx	0.784382	0.105472	0.278565	0.0770306	1.05484	0.0651672	1.18597	1.98977	0.195573	1.14518	0.0506002	1.29585	-2.10366	0.152435	1.11144
715	Cacna1b	0.565962	0.247213	0.586958	0.092078	1.0659	0.0564643	1.24823	2.06682	0.205456	1.15305	0.0506012	1.29584	-2.10365	0.148815	1.10866
1154	Lamp2	0.184189	0.734736	1.3921	0.646323	1.56517	0.258393	0.587719	1.17479	0.484951	1.39954	0.0506153	1.29572	-2.1035	0.578733	1.49354
2024	Itpr3	0.0498796	1.30208	2.13273	1.9551	3.87743	0.0500625	1.30049	2.13079	1.66012	3.16042	0.0506193	1.29568	-2.10346	1.15	2.21914
1089	Scg5	0.559424	0.252259	0.59698	0.159338	1.11677	0.0639945	1.19386	1.99958	0.341936	1.26746	0.050643	1.29548	-2.10322	0.25452	1.19294
3064	Clns1a	0.0788029	1.10346	1.88605	0.106237	1.07642	0.0117524	1.92987	2.86711	0.269373	1.20528	0.0506509	1.29541	-2.10314	0.146381	1.10679
1551	Gstm5	0.349567	0.45647	0.965576	0.138365	1.10066	0.0623276	1.20532	2.01382	0.23541	1.17724	0.0506911	1.29507	-2.10273	0.168988	1.12427
2103	Wnk1	0.25034	0.60147	1.19579	0.14124	1.10285	0.0495268	1.30516	2.13648	0.204615	1.15238	0.0507865	1.29425	-2.10176	0.138362	1.10065
4284	Zfp947	0.0744466	1.12815	1.9173	2.41428	5.33054	0.0196586	1.70645	2.61112	3.05966	8.33774	0.0508276	1.2939	-2.10134	1.77812	3.4298
1915	H4c16	0.257186	0.589752	1.1779	0.2411	1.18189	0.44284	0.353754	0.788234	0.122816	1.08886	0.0509069	1.29322	-2.10054	0.224292	1.1682
6576	Ptms	0.38417	0.415477	0.896458	0.202945	1.15105	0.0626385	1.20316	2.01114	0.373558	1.29554	0.0509262	1.29306	-2.10034	0.26928	1.20521
1285	Fkbp1a	0.397043	0.401163	0.871828	0.124865	1.09041	0.031789	1.49772	2.36731	0.253025	1.1917	0.0512403	1.29039	-2.09716	0.159648	1.11701
779	Ulk1	0.847992	0.0716081	0.195023	0.0862434	1.0616	0.110222	0.957733	1.69763	0.298439	1.22981	0.051276	1.29009	-2.0968	0.272296	1.20773
2444	Gtf2f1	0.206077	0.685971	1.32169	0.4463	1.36254	0.121332	0.916024	1.64225	0.436242	1.35307	0.0512846	1.29001	-2.09672	0.371499	1.2937
1471	H1-4	0.311599	0.506404	1.04718	0.229635	1.17254	0.325758	0.487104	1.01596	0.166041	1.12198	0.0513066	1.28983	-2.0965	0.231903	1.17438
5054	Katnal1	0.673474	0.171679	0.429769	0.044386	1.03124	0.17779	0.750093	1.41397	0.0961133	1.06889	0.0513474	1.28948	-2.09608	0.101177	1.07265
6365	Ociad1	0.374235	0.426856	0.91585	0.107508	1.07737	0.0608554	1.2157	2.02668	0.160907	1.11799	0.0513774	1.28923	-2.09578	0.114837	1.08285
5818	Smarca5	0.83541	0.0781005	0.211414	0.061649	1.04366	0.0936018	1.02872	1.79033	0.226187	1.16974	0.0514453	1.28865	-2.0951	0.195411	1.14505
4136	Znf365	0.85593	0.0675616	0.184711	0.0340922	1.02391	0.0594318	1.22598	2.0394	0.198112	1.1472	0.051453	1.28859	-2.09502	0.15261	1.11158
3895	Dnajc16	0.252006	0.598589	1.1914	0.156933	1.11491	0.0487952	1.31162	2.14434	0.238083	1.17942	0.0514979	1.28821	-2.09457	0.160016	1.1173
369	Hectd4	0.615133	0.211031	0.513424	0.0834512	1.05955	0.0838861	1.07631	1.85149	0.163572	1.12006	0.051516	1.28806	-2.09439	0.131059	1.0951
1417	Ppm1b	0.589074	0.22983	0.552007	0.0707726	1.05028	0.366858	0.435503	0.930478	0.0898354	1.06425	0.0515651	1.28764	-2.0939	0.144294	1.10519
195	Uprt	0.708571	0.149616	0.380964	0.0525127	1.03707	0.0343323	1.4643	2.32771	0.167631	1.12321	0.051671	1.28675	-2.09284	0.11215	1.08084
3916	Snph	0.510191	0.292268	0.674606	0.133869	1.09723	0.0529475	1.27615	2.10108	0.348925	1.27361	0.0517961	1.2857	-2.09158	0.245573	1.18556
5867	Tor1aip1	0.286579	0.542756	1.10498	0.185601	1.13729	0.0439381	1.35716	2.19949	0.270999	1.20664	0.0519337	1.28455	-2.09021	0.178529	1.13173
2809	Slc4a10	0.292528	0.533832	1.09091	0.211589	1.15796	0.050169	1.29956	2.12966	0.297959	1.2294	0.0519347	1.28454	-2.0902	0.201663	1.15002
7328	Mink1	0.393553	0.404996	0.878451	0.102578	1.07369	0.0959274	1.01806	1.77653	0.17822	1.13149	0.051938	1.28451	-2.09017	0.142948	1.10416
456	Heatr1	0.520041	0.283962	0.65875	0.160803	1.11791	0.219294	0.658973	1.28203	0.205038	1.15272	0.0521007	1.28316	-2.08855	0.230631	1.17335
6155	Slc24a3	0.312855	0.504658	1.04437	0.170761	1.12565	0.140125	0.853484	1.5578	0.218568	1.16358	0.0521798	1.2825	-2.08776	0.196357	1.1458
5149	Pigu	0.27703	0.557473	1.12802	0.268352	1.20443	0.137858	0.860569	1.56746	0.356785	1.28057	0.052249	1.28192	-2.08708	0.317476	1.24615
331	Rasal2	0.690002	0.16115	0.406659	0.0663377	1.04706	0.0842373	1.0745	1.84917	0.186845	1.13827	0.0522662	1.28178	-2.08691	0.151349	1.11061
981	Ckm	0.236565	0.62605	1.23296	0.480737	1.39546	0.80905	0.0920248	0.245956	0.0970691	1.0696	0.0523172	1.28136	-2.0864	0.607594	1.52372
1289	Map4	0.127028	0.896101	1.61554	0.150168	1.1097	0.0484997	1.31426	2.14755	0.188973	1.13995	0.0523256	1.28129	-2.08632	0.12629	1.09148
7396	Cpsf3	0.223919	0.64991	1.2686	0.174829	1.12883	0.0599718	1.22205	2.03454	0.198445	1.14746	0.0524015	1.28066	-2.08557	0.138626	1.10086
7558	Cetn2	0.272478	0.564669	1.13922	0.300716	1.23176	0.257892	0.588563	1.17608	0.329087	1.25622	0.052421	1.28049	-2.08538	0.390284	1.31065
2711	Fam81a	0.591725	0.22788	-0.548044	-0.0274336	0.981164	0.0535328	1.27138	2.09524	0.311702	1.24117	0.0524542	1.28022	-2.08505	0.271225	1.20683
4597	Phlpp2	0.0305988	1.5143	2.38689	0.522043	1.43599	0.0370298	1.43145	2.28861	0.518792	1.43275	0.0525157	1.27971	-2.08444	0.341774	1.26731
4494	Nup54	0.196647	0.706313	1.35124	0.155545	1.11384	0.048044	1.31836	2.15253	0.201754	1.1501	0.0525787	1.27919	-2.08382	0.134184	1.09747
3219	Spock1	0.0589368	1.22961	2.04388	0.190482	1.14115	0.16838	0.77371	1.44733	0.117412	1.08479	0.0527279	1.27796	-2.08235	0.115162	1.0831
16	Igkv4-57	0.0277313	1.55703	2.43717	2.42123	5.35627	0.00404606	2.39297	3.38925	3.58405	11.9924	0.0527326	1.27792	-2.08231	1.77326	3.41826
4517	Aifm2	0.336301	0.473272	0.993336	0.0853654	1.06096	0.12854	0.890963	1.60862	0.104435	1.07507	0.0527447	1.27782	-2.08219	0.0909458	1.06507
953	Mbp	0.0690053	1.16112	1.95873	0.497196	1.41147	0.159535	0.797143	1.48013	0.331676	1.25847	0.052803	1.27734	-2.08162	0.316252	1.24509
3113	Pde1a	0.647294	0.188899	0.466882	0.0631971	1.04478	0.0414215	1.38277	2.23034	0.179204	1.13226	0.052862	1.27686	-2.08104	0.12206	1.08829
4194	Trim23	0.00164873	2.78285	3.82727	2.46071	5.50488	0.350292	0.45557	0.96408	0.700287	1.62483	0.0528894	1.27663	-2.08077	1.28878	2.44322
3404	Ltn1	0.718125	0.1438	0.367849	0.0925093	1.06622	0.410422	0.38677	0.846785	0.102173	1.07339	0.0529186	1.27639	-2.08048	0.18548	1.1372
6771	Rpl22l1	0.271125	0.566831	1.14258	0.257399	1.19532	0.889649	0.0507811	-0.141124	-0.0247635	0.982982	0.0529745	1.27593	-2.07993	0.294605	1.22655
6659	Armc9	0.446265	0.350407	0.782208	0.13558	1.09853	0.173237	0.76136	1.42993	0.166299	1.12218	0.0530312	1.27547	-2.07938	0.164595	1.12085
2626	Rmdn3	0.581364	0.235552	0.563586	0.0660459	1.04684	0.0157804	1.80188	2.72098	0.224495	1.16837	0.0531332	1.27463	-2.07838	0.130085	1.09436
322	Dgkd	0.441048	0.355514	0.791396	0.102799	1.07385	0.0530474	1.27534	2.10008	0.198047	1.14714	0.0531523	1.27448	-2.0782	0.137176	1.09975
1863	Lrch1	0.208347	0.681212	1.31473	0.148315	1.10827	0.0688263	1.16225	1.96014	0.195551	1.14516	0.0531863	1.2742	-2.07786	0.140509	1.10229
5403	Aspscr1	0.44741	0.349294	0.780201	0.11976	1.08655	0.131937	0.879633	1.59333	0.18057	1.13333	0.0532364	1.27379	-2.07738	0.160597	1.11775
3062	Papola	0.211532	0.674623	1.30508	0.201403	1.14982	0.0843718	1.0738	1.84829	0.244603	1.18477	0.053241	1.27375	-2.07733	0.185119	1.13691
6485	Luc7l	0.178343	0.748745	1.41206	0.184202	1.13619	0.0428961	1.36758	2.21206	0.217353	1.1626	0.0532953	1.27331	-2.0768	0.140905	1.1026
7160	Jph1	0.480273	0.318512	0.723887	0.145684	1.10626	0.275043	0.5606	1.1329	0.144533	1.10537	0.0532997	1.27328	-2.07676	0.18239	1.13476
2922	Lhfpl4	0.583542	0.233928	0.560307	0.118119	1.08532	0.111515	0.952666	1.69094	0.322572	1.25056	0.0533525	1.27285	-2.07625	0.27692	1.21161
5645	Tdrd3	0.563508	0.2491	0.590713	0.0993111	1.07126	0.237735	0.623908	1.22974	0.128252	1.09297	0.053358	1.2728	-2.07619	0.150727	1.11013
2101	Stim2	0.155709	0.807686	1.49479	0.170462	1.12542	0.107017	0.970548	1.7145	0.176847	1.13041	0.0534065	1.27241	-2.07572	0.14334	1.10446
4846	Bcas3	0.642309	0.192256	0.474024	0.0761593	1.05421	0.0429409	1.36713	2.21151	0.203336	1.15136	0.0534293	1.27222	-2.0755	0.138953	1.10111
4509	Sec62	0.123018	0.910031	1.63423	0.26486	1.20152	0.0370915	1.43073	2.28775	0.28296	1.21669	0.0534883	1.27174	-2.07493	0.178782	1.13193
6813	Slirp	0.551537	0.258425	0.609155	0.14633	1.10675	0.0381592	1.4184	2.27303	0.343532	1.26886	0.0535467	1.27127	-2.07436	0.226177	1.16973
4265	Oscp1	0.338618	0.47029	0.988433	0.167601	1.12319	0.0680897	1.16692	1.96599	0.282823	1.21657	0.0536174	1.27069	-2.07368	0.20424	1.15208
6816	Sec11c	0.579579	0.236887	0.566278	0.0808864	1.05767	0.0413066	1.38398	2.23179	0.232401	1.17479	0.0537368	1.26973	-2.07252	0.155811	1.11405
7810	Mbd3	0.397593	0.400561	0.870787	0.179084	1.13216	0.0933768	1.02976	1.79168	0.28525	1.21862	0.0537642	1.26951	-2.07226	0.225141	1.16889
3071	Arhgef1	0.595197	0.225339	0.542866	0.120401	1.08704	0.124187	0.905924	1.62873	0.194386	1.14424	0.0538028	1.2692	-2.07189	0.172888	1.12731
4462	Clasp2	0.774748	0.11084	0.291385	0.081749	1.0583	0.150636	0.822072	1.51469	0.148165	1.10816	0.0538494	1.26882	-2.07144	0.146536	1.10691
2399	Slc39a7	0.112925	0.94721	-1.68372	-0.338351	0.790945	0.281895	0.549913	-1.11621	-0.249044	0.841454	0.0538833	1.26855	2.07111	-0.310346	0.806448
3264	Map2k2	0.854641	0.0682161	0.186383	0.0631683	1.04476	0.208034	0.681866	1.31569	0.162357	1.11911	0.0538928	1.26847	-2.07102	0.188747	1.13977
3649	Camk2d	0.843996	0.0736594	-0.200222	-0.0092175	0.993631	0.124678	0.904212	1.62643	0.233007	1.17528	0.0539517	1.26799	-2.07045	0.236349	1.17801
946	Mtnd4	0.378682	0.421725	0.907127	0.131422	1.09537	0.0633638	1.19816	2.00493	0.289995	1.22264	0.0539707	1.26784	-2.07027	0.206495	1.15388
5982	Cdc26	0.1197	0.921906	1.6501	0.271253	1.20686	0.240073	0.619656	1.22334	0.178198	1.13147	0.0540396	1.26729	-2.06961	0.201608	1.14998
6417	Cxxc1	0.410618	0.386562	0.846422	0.138453	1.10072	0.135494	0.86808	1.57767	0.174018	1.1282	0.054079	1.26697	-2.06923	0.154786	1.11326
3497	Skic2	0.503639	0.297881	0.685251	0.0612151	1.04334	0.145345	0.837599	1.53606	0.120155	1.08685	0.0541081	1.26674	-2.06895	0.111182	1.08011
7787	Hnrnpc	0.327987	0.484144	1.01113	0.0969634	1.06952	0.0319884	1.49501	2.3641	0.156526	1.1146	0.0541698	1.26624	-2.06836	0.0968316	1.06942
3928	Mfn2	0.276195	0.558785	1.13007	0.150109	1.10965	0.055032	1.25938	2.08053	0.247709	1.18732	0.0543577	1.26474	-2.06656	0.168909	1.12421
3161	Kif3b	0.755799	0.121593	0.316749	0.0776443	1.05529	0.0342052	1.46591	2.32962	0.232673	1.17501	0.0543959	1.26443	-2.06619	0.154749	1.11323
1133	H1-2	0.299958	0.522939	1.07363	0.914344	1.88471	0.248091	0.60539	1.20175	0.714947	1.64142	0.0544534	1.26398	-2.06564	0.822643	1.76864
6996	Akr1e2	0.0911876	1.04006	1.80498	0.137289	1.09984	0.174059	0.759304	1.42702	0.125486	1.09087	0.0544635	1.26389	-2.06555	0.122108	1.08832
2496	Aifm3	0.151564	0.819403	1.51101	0.16372	1.12017	0.0859389	1.06581	1.83806	0.172186	1.12676	0.0544722	1.26383	-2.06546	0.130362	1.09457
240	Xpnpep3	0.872852	0.0590594	0.162796	0.0243225	1.017	0.400625	0.397262	0.865068	0.067804	1.04812	0.054479	1.26377	-2.0654	0.123712	1.08953
6134	Mrpl27	0.843022	0.074161	-0.20149	0.0386951	1.02718	0.12941	0.888032	1.60467	0.27108	1.20671	0.0544819	1.26375	-2.06537	0.277859	1.21239
3462	Pdcd11	0.194443	0.711208	1.35832	0.275686	1.21057	0.180765	0.742886	1.40372	0.254342	1.19279	0.054602	1.26279	-2.06423	0.248445	1.18793
1382	Rab6a	0.740106	0.130706	0.337921	0.0437155	1.03077	0.0806626	1.09333	1.87318	0.125463	1.09086	0.054619	1.26266	-2.06406	0.100147	1.07188
2901	Nacad	0.7177	0.144057	0.368431	0.0438959	1.03089	0.0566994	1.24642	2.0646	0.161832	1.11871	0.0546426	1.26247	-2.06384	0.118003	1.08523
5570	Cacng8	0.32116	0.493278	1.02599	0.129336	1.09379	0.0716386	1.14485	1.93832	0.319188	1.24763	0.0546929	1.26207	-2.06336	0.231825	1.17432
2768	Dscaml1	0.373206	0.428052	0.917879	0.158338	1.116	0.173418	0.760905	1.42928	0.199321	1.14816	0.0547013	1.262	-2.06328	0.193728	1.14372
150	Pcdh7	0.571454	0.243019	0.578587	0.124103	1.08983	0.118643	0.925759	1.65524	0.228942	1.17198	0.0547057	1.26197	-2.06324	0.198741	1.1477
4676	Strip1	0.265079	0.576624	1.15772	0.184075	1.13609	0.0262492	1.58088	2.46512	0.323877	1.25169	0.054734	1.26174	-2.06297	0.192586	1.14281
7276	Stx6	0.405816	0.391671	0.855346	0.156259	1.11439	0.128412	0.891393	1.6092	0.253591	1.19217	0.0547354	1.26173	-2.06296	0.220475	1.16512
5047	Meak7	0.284737	0.545555	1.10938	0.11886	1.08588	0.0384337	1.41529	2.26931	0.209976	1.15667	0.0547475	1.26164	-2.06284	0.133252	1.09676
1406	Ptprk	0.426583	0.369996	0.817238	0.131584	1.0955	0.418254	0.37856	0.832374	0.130865	1.09495	0.0547572	1.26156	-2.06275	0.225474	1.16916
4994	Ago2	0.721187	0.141952	0.36366	0.0569965	1.0403	0.0905379	1.04317	1.80898	0.162257	1.11904	0.0547902	1.2613	-2.06244	0.133117	1.09666
7318	Sec61a2	0.487355	0.312155	0.712062	0.157919	1.11568	0.0351863	1.45363	2.31503	0.410182	1.32885	0.0548461	1.26085	-2.06191	0.262141	1.19926
4560	Usp38	0.981768	0.00799122	0.0232367	0.0119801	1.00834	0.35858	0.445414	0.947134	0.0918846	1.06576	0.054963	1.25993	-2.0608	0.155961	1.11416
1242	Xrcc6	0.0516227	1.28716	2.11453	0.289238	1.22199	0.402582	0.395146	0.861393	0.100276	1.07198	0.0550484	1.25926	-2.05999	0.167567	1.12316
1879	Rps14	0.945423	0.0243739	0.0696111	0.0459915	1.03239	0.104102	0.982539	1.73024	0.162048	1.11887	0.055049	1.25925	-2.05999	0.145259	1.10593
943	Mtnd1	0.15292	0.815537	1.50566	0.249935	1.18915	0.165882	0.780201	1.45645	0.191433	1.1419	0.0550936	1.2589	-2.05956	0.180155	1.13301
4802	Tmem163	0.706037	0.151173	0.384455	0.146172	1.10663	0.077066	1.11314	1.89832	0.291602	1.224	0.0550964	1.25888	-2.05954	0.227924	1.17115
482	Usp35	0.764789	0.116458	0.30469	0.0433004	1.03047	0.0161737	1.79119	2.70871	0.222705	1.16692	0.0551446	1.2585	-2.05908	0.131991	1.0958
5194	Rptor	0.332786	0.477835	1.00082	0.100194	1.07192	0.0874885	1.05805	1.82811	0.155677	1.11394	0.0551476	1.25847	-2.05905	0.118989	1.08597
1129	Kcnc1	0.331483	0.479539	1.00361	0.340857	1.26651	0.151108	0.820712	1.51282	0.486283	1.40083	0.0551568	1.2584	-2.05897	0.443877	1.36025
2283	Nf1	0.672041	0.172604	0.431783	0.0620926	1.04398	0.0516192	1.28719	2.11457	0.188429	1.13952	0.0551975	1.25808	-2.05858	0.133172	1.0967
4001	Dhx38	0.376994	0.423665	0.91043	0.136439	1.09919	0.148027	0.829658	1.52515	0.157874	1.11564	0.0552234	1.25788	-2.05834	0.143667	1.10471
4723	Uqcc5	0.0550583	1.25918	2.08027	0.722882	1.65048	0.047953	1.31918	2.15353	0.703952	1.62896	0.0552816	1.25742	-2.05779	0.473113	1.3881
4757	Mb21d2	0.34449	0.462824	0.976111	0.133219	1.09674	0.0356024	1.44852	2.30895	0.241329	1.18208	0.0554977	1.25573	-2.05576	0.151442	1.11068
4924	Sltm	0.507822	0.294288	0.678445	0.132484	1.09618	0.0529341	1.27626	2.10122	0.220394	1.16505	0.0556534	1.25451	-2.0543	0.152232	1.11129
3901	Adgrl1	0.458611	0.338555	0.760729	0.096168	1.06893	0.0368778	1.43324	2.29074	0.224793	1.16861	0.0556804	1.2543	-2.05405	0.143759	1.10478
886	Apaf1	0.547001	0.262012	0.6162	0.15175	1.11092	0.220135	0.657311	1.27957	0.178544	1.13174	0.0556902	1.25422	-2.05396	0.198208	1.14727
5229	Suox	0.478634	0.319996	0.726639	0.0969867	1.06954	0.0719978	1.14268	1.93559	0.160391	1.11759	0.05571	1.25407	-2.05377	0.118338	1.08548
5865	Slc41a3	0.135951	0.866617	1.57568	0.857018	1.81129	0.0386656	1.41267	2.26619	1.46502	2.76067	0.0557179	1.25401	-2.0537	0.923594	1.89684
3876	Dcaf5	0.368984	0.432993	0.926242	0.17979	1.13272	0.154402	0.811346	1.49986	0.220422	1.16507	0.0557249	1.25395	-2.05363	0.203189	1.15124
2258	Sos2	0.954676	0.020144	-0.0577936	0.0237014	1.01656	0.103992	0.982999	1.73084	0.140296	1.10213	0.05578	1.25352	-2.05312	0.128331	1.09303
7213	Tulp4	0.593326	0.226707	0.545655	0.0936956	1.0671	0.0995426	1.00199	1.75564	0.19863	1.14761	0.0557848	1.25348	-2.05307	0.162863	1.11951
6730	Synj2bp	0.351622	0.453924	0.961343	0.158887	1.11643	0.0834725	1.07846	1.85423	0.244477	1.18466	0.0558233	1.25318	-2.05271	0.184298	1.13626
3197	Sspn	0.332806	0.477809	1.00078	0.208734	1.15567	0.206333	0.685432	1.3209	0.271596	1.20714	0.0558264	1.25316	-2.05269	0.282761	1.21652
5987	Nmnat3	0.335897	0.473794	0.994194	0.189394	1.14029	0.0440031	1.35652	2.19872	0.330182	1.25717	0.0558371	1.25308	-2.05259	0.214909	1.16063
5812	Adarb1	0.422642	0.374027	0.824375	0.0782005	1.0557	0.210858	0.67601	1.30711	0.106859	1.07688	0.0558989	1.2526	-2.05201	0.11367	1.08198
7427	Tomm40	0.742683	0.129197	0.334434	0.0512961	1.0362	0.236221	0.626682	1.23391	0.120043	1.08677	0.0559031	1.25256	-2.05197	0.143661	1.1047
7045	Hsd17b11	0.142478	0.846251	1.54792	0.218908	1.16385	0.194296	0.711535	1.35879	0.1582	1.11589	0.0559055	1.25255	-2.05195	0.159078	1.11657
4251	Nipa1	0.160802	0.79371	1.47534	0.0920694	1.0659	0.0253499	1.59602	2.48283	0.191369	1.14185	0.0559589	1.25213	-2.05145	0.11218	1.08086
4967	Fermt2	0.187369	0.727302	1.38146	0.109915	1.07916	0.0247042	1.60723	2.49591	0.178167	1.13145	0.0559603	1.25212	-2.05144	0.104045	1.07478
3942	Ankrd13a	0.10368	0.984304	1.73255	0.207828	1.15495	0.121231	0.916387	1.64273	0.181405	1.13399	0.0560072	1.25176	-2.051	0.152433	1.11144
2860	Diras2	0.651261	0.186245	0.461216	0.0582535	1.0412	0.02679	1.57203	2.45475	0.246898	1.18665	0.0560236	1.25163	-2.05085	0.153725	1.11244
2450	Zc3h15	0.261269	0.582913	1.16741	0.181255	1.13387	0.0243042	1.61432	2.50418	0.243909	1.1842	0.0560363	1.25153	-2.05073	0.142564	1.10386
239	Ildr2	0.906578	0.042595	0.119355	0.0410071	1.02883	0.0239493	1.62071	2.51163	0.250897	1.18995	0.0560579	1.25136	-2.05053	0.160515	1.11769
4412	Iqcb1	0.563479	0.249122	0.590757	0.0726395	1.05164	0.312777	0.504765	1.04454	0.131283	1.09527	0.0561169	1.25091	-2.04998	0.180313	1.13313
7604	Rlim	0.888454	0.0513649	0.142664	0.203089	1.15116	0.696476	0.157094	0.397669	0.148403	1.10834	0.0561394	1.25073	-2.04977	0.626444	1.54376
241	2310061I04Rik	0.360926	0.442582	0.942387	0.137999	1.10038	0.0444267	1.35236	2.19369	0.239829	1.18085	0.0562326	1.25001	-2.04891	0.15653	1.1146
7324	Dusp14	0.646682	0.189309	0.467757	0.121887	1.08816	0.0341252	1.46692	2.33083	0.290322	1.22291	0.0562727	1.2497	-2.04854	0.18777	1.139
7039	Sorcs2	0.370639	0.431049	0.922956	0.115441	1.08331	0.0576159	1.23946	2.05602	0.20005	1.14874	0.0563025	1.24947	-2.04826	0.137853	1.10027
3601	Msl1	0.471772	0.326268	0.738223	0.134847	1.09798	0.177791	0.750091	1.41397	0.172597	1.12709	0.0563093	1.24942	-2.0482	0.170511	1.12546
2692	Ankrd34b	0.487483	0.312041	0.711849	0.142086	1.1035	0.322635	0.491288	1.02276	0.141005	1.10267	0.0563501	1.24911	-2.04782	0.19511	1.14481
3098	Ift88	0.277022	0.557486	1.12804	0.153338	1.11214	0.155167	0.8092	1.49689	0.163141	1.11972	0.056375	1.24891	-2.04759	0.148879	1.10871
2910	Bltp2	0.339991	0.468533	0.985539	0.138542	1.10079	0.0887667	1.05175	1.82002	0.199194	1.14806	0.0563892	1.2488	-2.04746	0.15212	1.1112
2690	Trappc14	0.281079	0.551172	1.11818	0.151704	1.11088	0.0344695	1.46256	2.32565	0.225737	1.16937	0.0564079	1.24866	-2.04729	0.139518	1.10154
224	Ankrd34a	0.191398	0.718064	1.3682	0.0945301	1.06772	0.0271977	1.56547	2.44706	0.147538	1.10768	0.0564789	1.24811	-2.04663	0.0872704	1.06236
2446	Mat2a	0.32524	0.487796	1.01708	0.100335	1.07202	0.0268164	1.5716	2.45425	0.171268	1.12605	0.0565452	1.2476	-2.04602	0.101947	1.07322
4369	Tbck	0.355344	0.449351	0.953718	0.105028	1.07552	0.0704306	1.15224	1.9476	0.181142	1.13378	0.0565921	1.24724	-2.04559	0.130369	1.09457
7036	Stard5	0.164975	0.782582	1.45978	0.159005	1.11652	0.204884	0.688492	1.32536	0.1116	1.08043	0.0566349	1.24692	-2.04519	0.114491	1.08259
2751	Prpf38a	0.486993	0.312477	0.712663	0.181776	1.13428	0.120936	0.917443	1.64414	0.249567	1.18885	0.0566524	1.24678	-2.04503	0.213028	1.15912
2568	Puf60	0.646778	0.189245	0.46762	0.0649818	1.04607	0.0227111	1.64376	2.53847	0.180714	1.13344	0.0567141	1.24631	-2.04446	0.109321	1.07872
6926	Poc5	0.212925	0.671773	1.30089	0.205274	1.15291	0.444042	0.352576	0.786116	0.11105	1.08001	0.056855	1.24523	-2.04317	0.196387	1.14582
7491	Numb	0.618506	0.208656	0.50849	0.117889	1.08515	0.193292	0.713786	1.36203	0.147829	1.1079	0.0568614	1.24518	-2.04311	0.155012	1.11343
3065	Hcfc1	0.592411	0.227377	0.54702	0.10503	1.07552	0.0606799	1.21695	2.02824	0.201021	1.14951	0.0568823	1.24502	-2.04292	0.144092	1.10503
4937	Pym1	0.245905	0.609233	1.20758	0.300983	1.23198	0.0991208	1.00384	1.75805	0.412968	1.33142	0.0569533	1.24448	-2.04227	0.32226	1.25029
1054	Rras	0.246755	0.607734	1.20531	0.169123	1.12437	0.0661237	1.17964	1.98188	0.20588	1.15339	0.0569738	1.24432	-2.04208	0.144414	1.10528
2303	Eif5b	0.484243	0.314937	0.717246	0.121111	1.08757	0.0532059	1.27404	2.09849	0.196574	1.14597	0.0570021	1.24411	-2.04182	0.134644	1.09782
5974	Gpr37l1	0.305572	0.514886	1.06078	0.179653	1.13261	0.0530243	1.27553	2.10031	0.303118	1.23381	0.0570441	1.24379	-2.04143	0.203214	1.15126
5635	Dcaf11	0.212222	0.673209	1.303	0.192312	1.14259	0.0429961	1.36657	2.21084	0.249321	1.18865	0.0570498	1.24375	-2.04138	0.159352	1.11679
3531	Dgkq	0.341837	0.466181	0.981659	0.154427	1.11298	0.103822	0.983709	1.73177	0.26895	1.20493	0.0571808	1.24275	-2.04019	0.214186	1.16005
6525	Shisa9	0.529734	0.275942	-0.643313	-0.0376349	0.974251	0.151586	0.819341	1.51092	0.229402	1.17235	0.0572049	1.24257	-2.03996	0.275062	1.21005
1995	Ube2l3	0.379227	0.421101	0.906063	0.110409	1.07953	0.0674972	1.17071	1.97073	0.201181	1.14964	0.0572137	1.2425	-2.03988	0.143301	1.10443
6279	Mrpl18	0.260303	0.584521	1.16988	0.452806	1.3687	0.13667	0.864326	1.57257	0.56555	1.47995	0.0573298	1.24162	-2.03883	0.489467	1.40393
6784	Eef1akmt2	0.159481	0.797292	1.48033	0.222964	1.16713	0.553707	0.25672	0.605796	0.090569	1.06479	0.0574026	1.24107	-2.03816	0.211065	1.15754
7510	Vav3	0.218109	0.661326	1.2855	0.185438	1.13716	0.189051	0.723422	1.3759	0.199815	1.14855	0.0574208	1.24093	-2.038	0.196631	1.14602
4825	Mfsd6	0.0365909	1.43663	2.29479	0.444749	1.36108	0.0382057	1.41787	2.2724	0.433763	1.35075	0.0576534	1.23918	-2.03589	0.280251	1.21441
6289	Atp5pb	0.417056	0.379806	0.834566	0.106047	1.07628	0.0166721	1.77801	2.69358	0.246455	1.18629	0.0576876	1.23892	-2.03558	0.137978	1.10036
158	Rsrc2	0.0756358	1.12127	-1.90861	-1.92646	0.263075	0.65277	0.18524	-0.459064	-0.411724	0.751725	0.0577065	1.23878	2.03541	-1.3066	0.404272
6642	Erp44	0.38959	0.409392	0.88602	0.151618	1.11081	0.0595774	1.22492	2.03808	0.234303	1.17634	0.0577366	1.23855	-2.03513	0.161987	1.11883
2718	Lrrfip1	0.615658	0.210661	0.512657	0.0443073	1.03119	0.0183722	1.73584	2.64505	0.193029	1.14316	0.0577475	1.23847	-2.03503	0.112321	1.08097
1978	Pcsk1	0.716613	0.144715	0.369919	0.117655	1.08497	0.176049	0.754367	1.42003	0.168803	1.12413	0.0577757	1.23825	-2.03478	0.172123	1.12672
3688	Tacc1	0.262479	0.580906	1.16432	0.151651	1.11084	0.0149907	1.82418	2.74652	0.288042	1.22098	0.0578391	1.23778	-2.03421	0.156653	1.1147
7350	Neu3	0.291896	0.534771	1.09239	0.185965	1.13758	0.110706	0.955829	1.69511	0.246345	1.1862	0.0578991	1.23733	-2.03366	0.198572	1.14756
1931	Gnb5	0.559718	0.252031	0.596529	0.095444	1.06839	0.0210152	1.67747	2.57759	0.275348	1.21029	0.0579224	1.23715	-2.03345	0.161769	1.11866
1858	Wdr5	0.46012	0.337129	0.758128	0.119387	1.08627	0.168062	0.77453	1.44848	0.200074	1.14876	0.0579528	1.23693	-2.03318	0.191082	1.14162
76	Osbpl9	0.467425	0.330288	0.745614	0.094938	1.06802	0.0415776	1.38114	2.22837	0.187086	1.13846	0.0579807	1.23672	-2.03293	0.121206	1.08764
5721	Yif1a	0.0358075	1.44603	2.30599	1.41939	2.67473	0.18296	0.737643	1.39625	0.821612	1.76738	0.0579811	1.23671	-2.03292	0.83563	1.78464
2670	Tgfbrap1	0.450921	0.3459	0.774066	0.10332	1.07424	0.0669384	1.17432	1.97524	0.196302	1.14576	0.0580207	1.23642	-2.03257	0.140276	1.10212
7250	Nrip3	0.0383238	1.41653	2.2708	0.189987	1.14075	0.226469	0.644991	1.26129	0.0985422	1.07069	0.0581526	1.23543	-2.03138	0.110655	1.07972
4785	Pcyox1l	0.232669	0.633261	1.24378	0.121409	1.0878	0.0444042	1.35258	2.19396	0.184823	1.13668	0.0582615	1.23462	-2.0304	0.118381	1.08552
2043	Stim1	0.401191	0.396649	0.864005	0.12149	1.08786	0.178849	0.747513	1.4103	0.125159	1.09063	0.0582665	1.23458	-2.03036	0.121571	1.08792
4845	Timm21	0.2854	0.544546	1.10779	0.164284	1.12061	0.104024	0.982866	1.73067	0.162953	1.11958	0.0583238	1.23415	-2.02984	0.128557	1.0932
3184	Prkci	0.497254	0.303422	0.695701	0.0954927	1.06843	0.0591871	1.22777	2.04161	0.232306	1.17471	0.0583379	1.23405	-2.02972	0.162159	1.11896
5553	Agap3	0.49189	0.308132	0.704542	0.0722436	1.05135	0.0916768	1.03774	1.80199	0.158421	1.11607	0.0583402	1.23403	-2.0297	0.123305	1.08923
454	Sec24c	0.496461	0.304115	0.697004	0.0988951	1.07095	0.0810878	1.09104	1.87028	0.183742	1.13583	0.058442	1.23327	-2.02878	0.138336	1.10063
2601	Hivep2	0.42971	0.366824	0.811604	0.0994952	1.0714	0.113521	0.944926	1.6807	0.169923	1.125	0.0584787	1.233	-2.02846	0.139737	1.1017
2137	Sptlc2	0.705433	0.151544	0.385287	0.0783409	1.0558	0.148038	0.829625	1.5251	0.20309	1.15116	0.0585608	1.23239	-2.02772	0.191672	1.14209
7263	Kcnq5	0.648575	0.18804	0.46505	0.0838615	1.05985	0.155745	0.807587	1.49465	0.176967	1.13051	0.0586946	1.2314	-2.02653	0.168427	1.12383
127	Tubb1	0.50561	0.296184	0.682039	0.103794	1.0746	0.148303	0.828851	1.52404	0.142072	1.10349	0.0587093	1.23129	-2.0264	0.129493	1.09391
4625	Ythdf3	0.425397	0.371206	0.819382	0.0751311	1.05346	0.110628	0.956136	1.69552	0.148276	1.10824	0.0587325	1.23112	-2.02619	0.120734	1.08729
2903	Acaca	0.218873	0.659807	1.28326	0.133429	1.0969	0.0445515	1.35114	2.19222	0.175354	1.12924	0.0587538	1.23096	-2.026	0.11211	1.08081
2273	Bche	0.127665	0.893929	1.61261	0.621891	1.53889	0.107234	0.969668	1.71335	0.558018	1.47224	0.0587768	1.23079	-2.02579	0.443786	1.36017
3579	Zbtb40	0.0217626	1.66229	-2.55999	-2.38542	0.191389	0.544433	0.264055	-0.620201	-0.60953	0.65541	0.0588368	1.23035	2.02526	-1.48049	0.358367
3240	Sh3gl3	0.477253	0.321251	0.728962	0.088548	1.0633	0.0872039	1.05946	1.82993	0.169236	1.12446	0.0588474	1.23027	-2.02517	0.129336	1.09379
6722	Tubb4a	0.332698	0.47795	1.00101	0.0923995	1.06614	0.580698	0.23605	0.564591	0.0401314	1.02821	0.0588581	1.23019	-2.02507	0.101188	1.07266
5927	Wac	0.604711	0.218452	0.528756	0.074564	1.05304	0.0223578	1.65057	2.54638	0.232039	1.17449	0.0588689	1.23011	-2.02497	0.137851	1.10026
4417	Metap1	0.298272	0.525387	1.07752	0.141188	1.10281	0.189814	0.721671	1.37338	0.120916	1.08742	0.0588847	1.23	-2.02483	0.118933	1.08593
5577	Pcnx3	0.444905	0.351733	0.784598	0.187803	1.13903	0.143091	0.844387	1.54537	0.302429	1.23322	0.0589797	1.2293	-2.02399	0.269248	1.20518
5742	Pcdhga2	0.690191	0.16103	0.406395	0.062613	1.04436	0.0772838	1.11191	1.89677	0.160467	1.11765	0.0590053	1.22911	-2.02376	0.122745	1.0888
7436	Rdh11	0.533149	0.273151	0.637912	0.0858619	1.06132	0.0261263	1.58292	2.46751	0.212845	1.15897	0.0590206	1.229	-2.02363	0.128019	1.09279
3507	Psd2	0.149443	0.825524	1.51946	0.204624	1.15239	0.0577301	1.2386	2.05496	0.231407	1.17398	0.0590443	1.22882	-2.02342	0.156011	1.1142
6327	Yeats4	0.945363	0.0244013	-0.069687	0.0576225	1.04075	0.0622911	1.20557	2.01413	0.269248	1.20518	0.0590569	1.22873	-2.02331	0.21043	1.15703
5484	Mical1	0.380654	0.41947	0.903282	0.114386	1.08251	0.107441	0.96883	1.71225	0.145583	1.10618	0.0590647	1.22867	-2.02324	0.116661	1.08422
1295	H2ax	0.66138	0.179549	0.446832	0.214995	1.1607	0.47738	0.321136	0.728749	0.132443	1.09615	0.0591234	1.22824	-2.02272	0.268536	1.20458
666	Ctnnd2	0.707913	0.15002	0.38187	0.113945	1.08218	0.15755	0.802582	1.4877	0.26109	1.19838	0.0591339	1.22816	-2.02262	0.251885	1.19076
1593	Cast	0.259554	0.585772	1.1718	0.248321	1.18782	0.179138	0.746812	1.40931	0.203756	1.15169	0.0591548	1.22801	-2.02244	0.194594	1.1444
6356	Fgfr1op2	0.288979	0.539133	1.09927	0.130241	1.09448	0.034234	1.46554	2.32919	0.205477	1.15307	0.0592218	1.22752	-2.02184	0.125493	1.09088
213	Ythdc2	0.649182	0.187633	0.464183	0.0853136	1.06092	0.0476889	1.32158	2.15644	0.24713	1.18684	0.0593074	1.22689	-2.02109	0.167874	1.1234
1281	Pik3r1	0.336223	0.473373	0.993502	0.128053	1.09282	0.038494	1.41461	2.2685	0.315608	1.24454	0.0593386	1.22666	-2.02081	0.197474	1.14669
866	Bsn	0.788062	0.10344	0.273682	0.0569396	1.04026	0.0976179	1.01047	1.76668	0.15378	1.11248	0.0593602	1.2265	-2.02062	0.12761	1.09248
7646	Eci2	0.69181	0.160013	0.404145	0.0631876	1.04477	0.0605888	1.21761	2.02904	0.171469	1.1262	0.0593827	1.22634	-2.02042	0.123444	1.08933
3644	Naa35	0.36167	0.441687	0.940885	0.107564	1.07741	0.0133249	1.87534	2.80499	0.24553	1.18553	0.0595728	1.22495	-2.01875	0.131965	1.09579
4413	Cibar1	0.248782	0.604181	1.19991	0.255665	1.19389	0.114125	0.94262	1.67764	0.302996	1.2337	0.059611	1.22467	-2.01841	0.244139	1.18439
31	Inafm2	0.459488	0.337726	0.759218	0.241305	1.18206	0.101378	0.994057	1.7453	0.5349	1.44884	0.0596306	1.22453	-2.01824	0.424216	1.34184
3002	Elavl2	0.111157	0.954063	1.69278	0.202959	1.15106	0.871248	0.0598582	-0.16487	-0.0178466	0.987706	0.0596579	1.22433	-2.018	0.172544	1.12704
2419	Patl1	0.899728	0.045889	0.128156	0.0699304	1.04967	0.267835	0.572132	1.15079	0.156349	1.11446	0.0596637	1.22429	-2.01795	0.204266	1.1521
2958	Clpb	0.598592	0.222869	0.537818	0.0869123	1.06209	0.0480661	1.31816	2.15229	0.211607	1.15798	0.0596709	1.22424	-2.01789	0.142596	1.10389
6901	Tax1bp3	0.0780937	1.10738	-1.89103	-2.11977	0.230083	0.413535	0.383488	-0.841036	-0.910951	0.531835	0.0597048	1.22399	2.01759	-1.50486	0.352364
689	Bysl	0.713255	0.146755	0.374525	0.172259	1.12682	0.242466	0.615349	1.21684	0.213729	1.15968	0.0597199	1.22388	-2.01746	0.252387	1.19118
374	Cracdl	0.261061	0.583257	1.16794	0.179645	1.13261	0.0311611	1.50639	2.37755	0.322681	1.25065	0.059761	1.22358	-2.01709	0.193202	1.1433
1830	Abce1	0.637197	0.195726	0.481375	0.0634146	1.04494	0.0261574	1.58241	2.4669	0.212311	1.15854	0.059775	1.22348	-2.01697	0.129226	1.09371
4424	Sumf2	0.514424	0.288679	0.66777	0.111553	1.08039	0.0858792	1.06611	1.83845	0.205347	1.15296	0.0598277	1.2231	-2.01651	0.156405	1.11451
6523	Pcbd2	0.292842	0.533366	1.09017	0.267576	1.20378	0.0764083	1.11686	1.90303	0.329555	1.25663	0.0598475	1.22295	-2.01634	0.237324	1.1788
5345	Thoc1	0.218271	0.661004	1.28503	0.237159	1.17867	0.0633605	1.19818	2.00496	0.262035	1.19917	0.0599086	1.22251	-2.0158	0.179629	1.13259
3576	Ints6	0.647344	0.188865	0.46681	0.168122	1.12359	0.321704	0.492544	1.0248	0.163173	1.11975	0.0599091	1.22251	-2.0158	0.227534	1.17083
7307	Scly	0.214067	0.669451	1.29748	0.284665	1.21813	0.0785145	1.10505	1.88807	0.329497	1.25658	0.0599232	1.2224	-2.01567	0.237936	1.1793
2118	Adcy5	0.208941	0.679977	1.31292	0.187404	1.13871	0.0431016	1.36551	2.20956	0.268182	1.20429	0.0599387	1.22229	-2.01554	0.169541	1.1247
2354	Itgb8	0.293168	0.532883	1.08941	0.136761	1.09943	0.0762913	1.11753	1.90387	0.176248	1.12994	0.0599442	1.22225	-2.01549	0.126825	1.09189
192	Ptpru	0.642111	0.19239	0.474308	0.280448	1.21457	0.523868	0.280778	0.652635	0.244303	1.18452	0.0599673	1.22209	-2.01529	0.553059	1.46719
7593	Trpv2	0.243929	0.612737	1.21289	0.306081	1.23634	0.109988	0.958656	1.69885	0.407091	1.32601	0.0599883	1.22193	-2.0151	0.323633	1.25148
5696	Dnajc9	0.522075	0.282267	0.655497	0.104218	1.07491	0.104449	0.981095	1.72834	0.163625	1.1201	0.060009	1.22178	-2.01492	0.131876	1.09572
4777	Btbd9	0.498149	0.302641	0.694232	0.0952165	1.06823	0.0592429	1.22736	2.0411	0.18315	1.13536	0.0601334	1.22088	-2.01384	0.126877	1.09193
2349	Zc3h18	0.450918	0.345903	0.774071	0.146159	1.10662	0.0606788	1.21696	2.02825	0.282169	1.21602	0.0602663	1.21993	-2.01268	0.195189	1.14487
4841	Ufl1	0.50117	0.300015	0.689281	0.0984181	1.0706	0.119124	0.923999	1.65289	0.155949	1.11415	0.0602927	1.21974	-2.01245	0.130456	1.09464
4080	Nmes1	0.71729	0.144305	0.368992	0.117348	1.08474	0.573703	0.241313	0.57517	0.0774926	1.05518	0.0603306	1.21946	-2.01212	0.204087	1.15196
4727	Trmt10a	0.25774	0.588817	1.17647	0.98401	1.97796	0.087996	1.05554	1.82489	1.40473	2.64767	0.0603548	1.21929	-2.01191	1.04535	2.06387
803	Cask	0.69368	0.158841	0.401547	0.0676948	1.04804	0.0685336	1.1641	1.96246	0.20756	1.15473	0.0604748	1.21843	-2.01087	0.153079	1.11194
6368	Xpot	0.584586	0.233151	0.558737	0.0848663	1.06059	0.0691536	1.16019	1.95756	0.172399	1.12693	0.0606495	1.21717	-2.00935	0.125068	1.09056
655	Klf12	0.217733	0.662076	1.28661	1.36242	2.57117	0.160139	0.795504	1.47784	1.2265	2.33998	0.0606534	1.21714	-2.00932	1.10919	2.15725
3708	Efr3b	0.460237	0.337019	0.757928	0.0814706	1.0581	0.0398522	1.39955	2.25047	0.201746	1.15009	0.0606595	1.2171	-2.00927	0.128092	1.09285
5752	Egln1	0.374135	0.426972	0.916047	0.118127	1.08532	0.0992833	1.00312	1.75712	0.199243	1.1481	0.0607357	1.21656	-2.00861	0.154663	1.11316
1292	Plaa	0.515528	0.287748	0.665993	0.0775049	1.05519	0.0208194	1.68153	2.5823	0.198374	1.1474	0.060819	1.21596	-2.00789	0.114303	1.08245
6681	Lamp5	0.610616	0.214232	0.520054	0.0801076	1.0571	0.0750845	1.12445	1.91262	0.217228	1.1625	0.0609257	1.2152	-2.00697	0.161284	1.11828
6517	Commd8	0.258985	0.586726	1.17326	0.178637	1.13181	0.422735	0.373931	0.824206	0.102441	1.07359	0.0609877	1.21476	-2.00643	0.169108	1.12436
6047	Dhrs1	0.554958	0.25574	0.603863	0.126852	1.09191	0.406711	0.390714	0.853677	0.118172	1.08536	0.0609924	1.21472	-2.00639	0.195601	1.1452
7590	Ak3	0.510818	0.291734	0.673591	0.0947636	1.06789	0.042706	1.36951	2.21438	0.202917	1.15102	0.0610674	1.21419	-2.00575	0.131139	1.09516
1659	Msh6	0.41434	0.382644	0.839554	0.134039	1.09736	0.0252266	1.59814	2.4853	0.256625	1.19468	0.0611133	1.21386	-2.00535	0.149969	1.10955
5415	Kctd5	0.014938	1.82571	2.74827	1.69448	3.23659	0.00853461	2.06882	3.02457	1.89075	3.70829	0.0611603	1.21353	-2.00495	1.0013	2.0018
3388	Nlgn2	0.711711	0.147696	0.376646	0.0966459	1.06928	0.0674409	1.17108	1.97119	0.298964	1.23026	0.0611865	1.21334	-2.00472	0.219594	1.16441
3359	Kiaa1549	0.659661	0.180679	0.449268	0.0623103	1.04414	0.080123	1.09624	1.87689	0.189626	1.14047	0.0611871	1.21334	-2.00472	0.144151	1.10508
6766	Polr2d	0.156235	0.806222	1.49275	0.614479	1.53101	0.253701	0.595678	1.18696	0.444132	1.3605	0.0612066	1.2132	-2.00455	0.499875	1.41409
555	Man2b1	0.318345	0.497101	1.03218	0.134914	1.09803	0.184035	0.735099	1.39262	0.125699	1.09104	0.0612171	1.21313	-2.00446	0.120868	1.08739
5935	Xrcc4	0.430063	0.366468	0.810971	0.114246	1.08241	0.115796	0.936305	1.66926	0.207334	1.15455	0.0612355	1.213	-2.0043	0.169471	1.12465
4031	Cnksr2	0.655461	0.183453	0.455233	0.0804321	1.05733	0.196893	0.705769	1.35046	0.154169	1.11278	0.0613427	1.21224	-2.00338	0.160385	1.11759
3522	Abcf1	0.420278	0.376464	0.828678	0.169644	1.12478	0.0829487	1.08119	1.85772	0.232983	1.17526	0.0613565	1.21214	-2.00326	0.172461	1.12698
7848	Slc25a20	0.36306	0.440022	0.938088	0.15606	1.11424	0.0487118	1.31237	2.14524	0.221702	1.16611	0.0613809	1.21197	-2.00306	0.144246	1.10515
428	Syngap1	0.572313	0.242367	-0.577282	-0.00531011	0.996326	0.134563	0.871075	1.58173	0.144954	1.1057	0.0613908	1.2119	-2.00297	0.158329	1.11599
1192	Nelfe	0.943138	0.025425	0.0725311	0.0871509	1.06227	0.536405	0.270507	0.632781	0.130178	1.09443	0.0614702	1.21134	-2.00229	0.324833	1.25252
6620	Rab1b	0.159937	0.796052	1.47861	0.119093	1.08605	0.182453	0.738849	1.39797	0.163979	1.12037	0.0614953	1.21116	-2.00208	0.156288	1.11442
3837	Ints7	0.2802	0.552533	1.12031	0.174942	1.12892	0.0463866	1.33361	2.17102	0.247122	1.18684	0.0615072	1.21107	-2.00197	0.158032	1.11576
3124	Fscn1	0.474731	0.323552	0.733215	0.0997322	1.07157	0.0352858	1.4524	2.31357	0.204145	1.152	0.0615977	1.21044	-2.0012	0.126574	1.0917
2674	Acsf3	0.497441	0.303259	0.695395	0.100829	1.07239	0.0388455	1.41066	2.26377	0.209735	1.15648	0.0616074	1.21037	-2.00112	0.132652	1.09631
6319	Uqcc2	0.297906	0.525921	1.07837	0.202127	1.15039	0.643796	0.191252	0.47189	0.0445756	1.03138	0.0616514	1.21006	-2.00074	0.133544	1.09699
5145	Inpp5b	0.430798	0.365726	0.80965	0.160624	1.11777	0.19436	0.711393	1.35858	0.206642	1.154	0.0616668	1.20995	-2.00061	0.205784	1.15331
1906	Rpl18a	0.500842	0.300299	0.689819	0.249689	1.18895	0.0761405	1.11838	1.90496	0.471505	1.38656	0.0616735	1.2099	-2.00056	0.344462	1.26968
6607	Syf2	0.108332	0.965241	1.70752	0.502656	1.41682	0.193576	0.713148	1.36112	0.372899	1.29495	0.0616784	1.20987	-2.00051	0.367464	1.29008
2397	Lrfn1	0.298383	0.525226	1.07726	0.203075	1.15115	0.0556102	1.25485	2.07496	0.383011	1.30406	0.0617684	1.20923	-1.99975	0.254273	1.19273
3677	Ranbp10	0.594909	0.225549	0.543295	0.0737703	1.05246	0.0228423	1.64126	2.53556	0.237985	1.17934	0.0619438	1.208	-1.99826	0.139788	1.10174
6854	Trmu	0.126937	0.896411	1.61595	0.351984	1.27631	0.172358	0.763569	1.43305	0.292238	1.22454	0.0619499	1.20796	-1.9982	0.272355	1.20778
4843	Phf20l1	0.369764	0.432076	0.924692	0.119695	1.08651	0.0682389	1.16597	1.9648	0.241184	1.18196	0.061959	1.2079	-1.99813	0.168623	1.12398
617	Slc27a2	0.512154	0.290599	0.671431	0.110275	1.07943	0.0923806	1.03442	1.7977	0.217513	1.16273	0.0619969	1.20763	-1.9978	0.167356	1.123
6260	Mtres1	0.266676	0.574016	1.1537	0.149552	1.10922	0.183814	0.735622	1.39337	0.23815	1.17948	0.0621609	1.20648	-1.99641	0.227092	1.17047
3991	Ubap2l	0.253742	0.595607	1.18686	0.164341	1.12065	0.0847926	1.07164	1.84553	0.186358	1.13789	0.0621987	1.20622	-1.99609	0.13625	1.09904
6325	Ufc1	0.19616	0.707389	1.3528	0.476317	1.39119	0.531419	0.274563	0.640645	0.147944	1.10799	0.0622004	1.20621	-1.99608	0.316909	1.24566
1153	Atf2	0.210509	0.676729	1.30817	0.176043	1.12978	0.0228015	1.64204	2.53646	0.30216	1.23299	0.0622332	1.20598	-1.9958	0.170419	1.12539
5185	Ltbp4	0.594233	0.226043	0.544302	0.416819	1.33498	0.335712	0.474033	0.994586	0.688168	1.61124	0.0622353	1.20596	-1.99578	0.968157	1.95634
3199	Dag1	0.600136	0.22175	0.535528	0.0721442	1.05128	0.143014	0.844622	1.54569	0.126624	1.09174	0.0622355	1.20596	-1.99578	0.113636	1.08195
4697	Zhx3	0.108985	0.962632	1.70409	0.166017	1.12196	0.429235	0.367305	0.812459	0.0749794	1.05335	0.0622678	1.20574	-1.99551	0.125751	1.09108
720	Copb2	0.24124	0.61755	1.22016	0.145576	1.10617	0.0244162	1.61232	2.50186	0.233246	1.17548	0.0622779	1.20567	-1.99542	0.133021	1.09659
5208	Flcn	0.275483	0.559905	1.13181	1.09	2.12874	0.232639	0.633317	1.24386	1.10023	2.14389	0.0622978	1.20553	-1.99526	1.17538	2.25852
3744	Mindy1	0.328289	0.483744	1.01048	0.139787	1.10174	0.135927	0.866694	1.57579	0.14737	1.10755	0.0623222	1.20536	-1.99505	0.125188	1.09065
5884	Gmppa	0.322189	0.491889	1.02373	0.103892	1.07467	0.0377358	1.42325	2.27882	0.193922	1.14387	0.0624018	1.2048	-1.99438	0.119291	1.0862
6527	Qrsl1	0.360608	0.442965	0.94303	0.0651402	1.04619	0.0123405	1.90867	2.84298	0.208239	1.15528	0.0625613	1.20369	-1.99303	0.109676	1.07899
3681	Pcp4l1	0.656625	0.182682	0.453579	0.0616458	1.04366	0.32376	0.489777	1.0203	0.121027	1.08751	0.0625655	1.20366	-1.993	0.16741	1.12304
4953	Bag5	0.35263	0.45268	0.959271	0.137828	1.10025	0.0641214	1.193	1.99851	0.211065	1.15754	0.0625713	1.20362	-1.99295	0.144824	1.1056
4538	Aph1a	0.175146	0.756599	1.42319	0.373622	1.2956	0.0549666	1.2599	2.08116	0.484729	1.39932	0.0625863	1.20352	-1.99282	0.318666	1.24718
5640	Nxph3	0.639521	0.194145	0.47803	0.280674	1.21476	0.199333	0.70042	1.34271	0.425107	1.34267	0.062603	1.20341	-1.99268	0.440713	1.35728
1802	Morf4l1	0.159569	0.797052	1.48	0.201939	1.15024	0.433062	0.36345	0.805595	0.0855715	1.06111	0.0626092	1.20336	-1.99263	0.143534	1.10461
7310	Aldh9a1	0.407238	0.390151	0.852695	0.106267	1.07644	0.023042	1.63748	2.53116	0.231004	1.17365	0.0626235	1.20326	-1.99251	0.132322	1.09606
2935	Parl	0.146721	0.833508	1.53044	0.503483	1.41763	0.226486	0.644958	1.26124	0.376355	1.29806	0.0626255	1.20325	-1.99249	0.396235	1.31607
379	Wdfy1	0.108527	0.964462	1.7065	2.28324	4.8677	0.131437	0.881281	1.59555	1.8853	3.69429	0.0626597	1.20301	-1.99221	1.58481	2.99968
4364	Olfm2	0.634931	0.197274	0.484642	0.216617	1.16201	0.0913013	1.03952	1.80428	0.505599	1.41971	0.0626901	1.2028	-1.99195	0.393868	1.31391
5139	Prpf39	0.246357	0.608435	1.20637	0.128548	1.09319	0.00911676	2.04016	2.99218	0.250489	1.18961	0.0627159	1.20262	-1.99173	0.126448	1.0916
3392	Myorg	0.288045	0.54054	1.10149	0.140188	1.10205	0.103477	0.985156	1.73366	0.150435	1.1099	0.0627626	1.2023	-1.99134	0.116325	1.08397
5599	Sfxn3	0.510276	0.292195	0.674467	0.0376485	1.02644	0.0279613	1.55344	2.43296	0.197053	1.14635	0.06279	1.20211	-1.99111	0.117551	1.08489
2057	Fgf13	0.203988	0.690396	1.32814	0.272106	1.20757	0.127929	0.893032	1.61141	0.256646	1.1947	0.0628428	1.20174	-1.99067	0.211705	1.15806
4599	Ift57	0.232892	0.632845	1.24315	0.523075	1.43701	0.451622	0.345225	0.772844	0.310756	1.24036	0.0628623	1.20161	-1.99051	0.543686	1.45769
181	Thada	0.403058	0.394632	0.8605	0.12093	1.08744	0.116648	0.933123	1.66504	0.198667	1.14764	0.0628678	1.20157	-1.99046	0.161087	1.11813
317	Kctd17	0.441589	0.354982	0.790441	0.191835	1.14222	0.154794	0.810245	1.49833	0.351703	1.27607	0.062868	1.20157	-1.99046	0.31675	1.24552
6090	Park7	0.361209	0.442241	0.941815	0.13855	1.1008	0.0231796	1.63489	2.52815	0.272403	1.20782	0.0628722	1.20154	-1.99042	0.155278	1.11364
5153	Rab15	0.804178	0.0946476	-0.252373	-0.0190928	0.986853	0.140693	0.851727	1.5554	0.114948	1.08294	0.0628991	1.20136	-1.9902	0.116904	1.0844
6615	Tbcb	0.397883	0.400245	0.870239	0.116922	1.08442	0.0284039	1.54662	2.42495	0.251326	1.1903	0.0629443	1.20104	-1.98982	0.148216	1.1082
146	Arid1a	0.741631	0.129812	0.335856	0.0854626	1.06103	0.138232	0.859392	1.56586	0.189508	1.14038	0.0630299	1.20045	-1.9891	0.171607	1.12631
3049	Prpf4b	0.59905	0.222537	0.537138	0.126947	1.09198	0.133009	0.876121	1.58857	0.176214	1.12991	0.0630555	1.20028	-1.98889	0.153412	1.1122
4617	Taok3	0.605168	0.218124	0.528081	0.0894076	1.06393	0.0110091	1.95825	2.89936	0.315332	1.2443	0.063135	1.19973	-1.98822	0.168427	1.12383
5629	Brk1	0.551217	0.258677	0.609651	0.134215	1.0975	0.118703	0.925538	1.65494	0.217308	1.16256	0.0631382	1.19971	-1.9882	0.180557	1.13332
5693	Strbp	0.582391	0.234785	0.562039	0.13199	1.0958	0.0312686	1.50489	2.37578	0.294101	1.22612	0.0632032	1.19926	-1.98765	0.180056	1.13293
882	Arl6	0.342762	0.465007	0.979721	0.261307	1.19856	0.2087	0.680478	1.31366	0.214399	1.16022	0.0632978	1.19861	-1.98687	0.216972	1.16229
2318	Bax	0.228557	0.641005	1.25535	0.136678	1.09937	0.031326	1.50409	2.37484	0.257694	1.19557	0.0633372	1.19834	-1.98654	0.152101	1.11119
5412	Tkfc	0.684752	0.164466	0.413973	0.0514253	1.03629	0.508274	0.293902	0.677712	0.063726	1.04516	0.0633774	1.19807	-1.9862	0.136953	1.09958
3860	Galnt17	0.325638	0.487265	1.01622	0.167029	1.12274	0.192962	0.714529	1.36311	0.184852	1.1367	0.0635135	1.19713	-1.98507	0.179843	1.13276
4653	Ppcdc	0.224882	0.648046	1.26583	0.322852	1.2508	0.0838224	1.07664	1.85191	0.421091	1.33894	0.0635923	1.1966	-1.98442	0.304947	1.23537
4934	Septin8	0.185641	0.731326	1.38722	0.159286	1.11673	0.0147134	1.83229	2.7558	0.226367	1.16988	0.0635959	1.19657	-1.98439	0.119818	1.0866
4006	Eif4g3	0.980713	0.00845793	0.0245809	0.0774254	1.05513	0.167763	0.775305	1.44957	0.179276	1.13232	0.0636351	1.1963	-1.98406	0.183964	1.136
5784	Tmem63a	0.158917	0.798829	1.48248	0.298913	1.23022	0.122741	0.911011	1.63554	0.291862	1.22422	0.0636618	1.19612	-1.98384	0.237045	1.17858
687	Tpd52l1	0.869239	0.0608608	0.167468	0.038914	1.02734	0.0722553	1.14113	1.93364	0.165034	1.12119	0.0636902	1.19593	-1.98361	0.125486	1.09088
6053	St13	0.381657	0.418326	0.90133	0.0958413	1.06869	0.0398379	1.3997	2.25065	0.187576	1.13885	0.06372	1.19572	-1.98336	0.11657	1.08415
2904	Shroom1	0.0684304	1.16475	1.96328	0.870589	1.82841	0.014536	1.83756	2.76183	1.11053	2.15926	0.0637735	1.19536	-1.98292	0.593046	1.50843
6052	Eif2s2	0.980736	0.00844785	-0.0245518	0.0579486	1.04098	0.0647464	1.18878	1.99327	0.148651	1.10853	0.0638118	1.1951	-1.9826	0.113508	1.08186
6275	Denr	0.588502	0.230252	0.552864	0.0473697	1.03338	0.114294	0.941976	1.67679	0.143074	1.10426	0.0638125	1.19509	-1.98259	0.117745	1.08504
5926	Med15	0.450829	0.345988	0.774225	0.688717	1.61185	0.551988	0.25807	0.608456	0.512448	1.42647	0.06382	1.19504	-1.98253	1.18049	2.26654
1360	Slc2a3	0.719011	0.143265	0.366636	0.0188516	1.01315	0.0724684	1.13985	1.93204	0.266394	1.2028	0.0638256	1.19501	-1.98249	0.196986	1.1463
4885	Pars2	0.159277	0.797848	1.48111	0.265588	1.20213	0.0375176	1.42577	2.28183	0.36212	1.28531	0.0638707	1.1947	-1.98211	0.219976	1.16471
3713	Arhgap26	0.606219	0.217371	0.52653	0.0843939	1.06024	0.0624194	1.20468	2.01303	0.186664	1.13813	0.0638871	1.19459	-1.98198	0.130746	1.09486
7233	Cog8	0.399685	0.398282	0.866838	0.137792	1.10022	0.172737	0.762614	1.4317	0.222432	1.1667	0.0639349	1.19426	-1.98158	0.207349	1.15456
5006	Klhl2	0.136098	0.866149	1.57505	0.241218	1.18199	0.286655	0.54264	1.1048	0.14108	1.10273	0.0639838	1.19393	-1.98118	0.169341	1.12454
3509	Tnpo3	0.322104	0.492004	1.02392	0.131262	1.09525	0.0684327	1.16474	1.96326	0.200099	1.14878	0.0640821	1.19326	-1.98037	0.138187	1.10052
5413	Ccdc9	0.445728	0.35093	0.78315	0.158409	1.11606	0.0535554	1.2712	2.09501	0.241469	1.1822	0.0641749	1.19263	-1.97961	0.159833	1.11716
7428	Clic4	0.179947	0.744857	1.40653	0.178014	1.13133	0.109601	0.960185	1.70086	0.203684	1.15164	0.0642758	1.19195	-1.97878	0.158941	1.11647
706	Rnf13	0.245929	0.609191	1.20752	0.119907	1.08666	0.212688	0.672257	1.3016	0.111218	1.08014	0.0643253	1.19162	-1.97837	0.112348	1.08099
6665	Mobp	0.0100931	1.99597	2.94215	0.795931	1.7362	0.243977	0.61265	1.21276	0.316883	1.24564	0.0643504	1.19145	-1.97816	0.390048	1.31044
6138	Acss1	0.144022	0.84157	1.54151	0.179951	1.13285	0.00924337	2.03417	2.9854	0.26307	1.20003	0.0643516	1.19144	-1.97815	0.131821	1.09568
3994	Pelo	0.337825	0.471309	0.990108	0.0820466	1.05852	0.0670898	1.17334	1.97402	0.206382	1.15379	0.0643561	1.19141	-1.97812	0.141895	1.10335
1345	Hmgb2	0.422869	0.373794	0.823964	0.169497	1.12467	0.0456537	1.34052	2.17939	0.29636	1.22804	0.0643957	1.19114	-1.97779	0.189282	1.1402
5545	Slc25a3	0.546063	0.262758	0.617661	0.0805688	1.05743	0.048232	1.31666	2.15047	0.185389	1.13712	0.064461	1.1907	-1.97726	0.121528	1.08789
1779	Anks1a	0.129315	0.88835	1.6051	0.143233	1.10438	0.770966	0.112965	0.296431	0.0296441	1.02076	0.0644799	1.19058	-1.9771	0.142311	1.10367
665	Cdk5r2	0.799419	0.0972257	-0.258653	0.0368607	1.02588	0.0544562	1.26395	2.08613	0.343964	1.26924	0.06451	1.19037	-1.97685	0.262731	1.19975
1851	Snn	0.194939	0.7101	1.35672	0.227209	1.17057	0.0583585	1.2339	2.04917	0.283755	1.21736	0.0645313	1.19023	-1.97668	0.187567	1.13884
5597	Rab14	0.594848	0.225594	0.543386	0.0552939	1.03907	0.0564076	1.24866	2.06735	0.148281	1.10825	0.0645346	1.19021	-1.97665	0.101094	1.07259
7179	Palmd	0.314547	0.502315	1.04059	0.170326	1.12531	0.205644	0.686883	1.32302	0.197366	1.1466	0.0645566	1.19006	-1.97647	0.196736	1.1461
5133	Paf1	0.484454	0.314748	0.716894	0.104633	1.07522	0.00952012	2.02136	2.9709	0.246713	1.1865	0.0645847	1.18987	-1.97624	0.127112	1.09211
2546	Ssbp4	0.55355	0.256843	0.606038	0.0981608	1.07041	0.174645	0.757844	1.42495	0.184761	1.13663	0.0646986	1.18911	-1.97531	0.176122	1.12984
6112	Pccb	0.321633	0.49264	1.02495	0.0733942	1.05219	0.0465771	1.33183	2.16886	0.152032	1.11113	0.0647923	1.18848	-1.97455	0.0963691	1.06908
2641	Afg2a	0.508755	0.293491	0.676931	0.175953	1.12971	0.152221	0.817527	1.50842	0.265106	1.20172	0.0649438	1.18746	-1.97331	0.237174	1.17868
7444	St6galnac5	0.637172	0.195743	0.481411	0.0852452	1.06087	0.450179	0.346615	0.77536	0.0857281	1.06122	0.0649522	1.18741	-1.97325	0.156393	1.1145
6389	Raver1	0.0483238	1.31584	2.14947	0.370836	1.2931	0.083157	1.0801	1.85633	0.258311	1.19608	0.0651126	1.18634	-1.97194	0.192058	1.14239
2743	Vezt	0.326834	0.485673	1.01362	0.127122	1.09211	0.0873169	1.0589	1.82921	0.194673	1.14446	0.0651714	1.18594	-1.97146	0.142445	1.10377
7736	Aifm1	0.460584	0.336691	0.75733	0.0977909	1.07013	0.0927322	1.03277	1.79557	0.152998	1.11188	0.0652687	1.18529	-1.97067	0.115392	1.08327
6262	Pcyox1	0.54235	0.26572	0.623456	0.0963442	1.06906	0.0163682	1.786	2.70275	0.253765	1.19232	0.0653114	1.18501	-1.97033	0.139621	1.10162
6713	Syap1	0.558984	0.252601	0.597658	0.0979081	1.07022	0.104843	0.979459	1.7262	0.144007	1.10497	0.06532	1.18495	-1.97026	0.114076	1.08228
7326	Rabgef1	0.588002	0.230622	0.553613	0.0945395	1.06772	0.0533876	1.27256	2.09668	0.194178	1.14407	0.0653375	1.18484	-1.97012	0.130265	1.09449
6147	Ankrd17	0.448527	0.348212	0.778246	0.109038	1.07851	0.0780036	1.10789	1.89167	0.193999	1.14393	0.0653621	1.18467	-1.96992	0.139439	1.10148
707	Tnk2	0.454162	0.342789	0.768428	0.129886	1.09421	0.128452	0.891259	1.60902	0.197822	1.14697	0.0653655	1.18465	-1.96989	0.164868	1.12106
4568	Phka2	0.33897	0.469838	0.987689	0.148407	1.10835	0.150063	0.823726	1.51698	0.184339	1.1363	0.065425	1.18426	-1.96941	0.160417	1.11761
4158	Slc25a44	0.322187	0.491891	1.02374	0.189161	1.1401	0.0657636	1.18201	1.98484	0.287454	1.22048	0.0654453	1.18412	-1.96925	0.19562	1.14522
660	Slc1a4	0.662248	0.178979	0.445603	0.107229	1.07716	0.100406	0.998242	1.75076	0.233476	1.17566	0.0655637	1.18334	-1.96829	0.185364	1.1371
6919	Fam13c	0.631666	0.199513	0.48936	0.307924	1.23792	0.34483	0.462394	0.975401	0.385245	1.30608	0.0656421	1.18282	-1.96766	0.547287	1.46133
437	Tspan15	0.195712	0.708382	1.35424	0.292582	1.22483	0.156294	0.806057	1.49252	0.298454	1.22983	0.0658312	1.18157	-1.96613	0.261785	1.19896
3635	Ubtd2	0.557059	0.254099	0.600622	0.0570366	1.04033	0.0886673	1.05224	1.82065	0.18514	1.13693	0.0659099	1.18105	-1.9655	0.13934	1.1014
2223	Cpe	0.937035	0.0282441	-0.0803321	0.022236	1.01553	0.0665293	1.17699	1.97857	0.151523	1.11074	0.0659235	1.18096	-1.96539	0.116429	1.08405
3998	Mrps7	0.38348	0.416257	0.897793	0.138755	1.10095	0.144956	0.838764	1.53766	0.173433	1.12774	0.0661105	1.17973	-1.96389	0.149193	1.10895
2353	Cntnap5a	0.566062	0.247136	0.586806	0.136165	1.09898	0.039191	1.40681	2.25917	0.407411	1.3263	0.0661194	1.17967	-1.96382	0.255686	1.1939
320	Mtcl2	0.214503	0.668567	1.29618	0.194274	1.14415	0.0642808	1.19192	1.99717	0.245258	1.1853	0.0661639	1.17938	-1.96347	0.164695	1.12093
2046	Tial1	0.287138	0.541909	1.10364	0.143789	1.1048	0.0496863	1.30376	2.13478	0.210284	1.15692	0.0661811	1.17927	-1.96333	0.13397	1.09731
2672	Snx21	0.36254	0.440645	0.939134	0.156315	1.11444	0.0540854	1.26692	2.08977	0.288371	1.22126	0.0662039	1.17912	-1.96315	0.188062	1.13923
2350	Dact3	0.174081	0.759249	1.42694	0.191144	1.14167	0.00530336	2.27545	3.2573	0.318083	1.24667	0.0662053	1.17911	-1.96313	0.150367	1.10985
2936	Arcn1	0.495076	0.305328	0.699285	0.0906305	1.06484	0.0618801	1.20845	2.0177	0.157446	1.11531	0.0662546	1.17878	-1.96274	0.107288	1.0772
529	Diaph1	0.926859	0.0329862	0.0933521	0.0590214	1.04176	0.246226	0.608666	1.20672	0.142954	1.10416	0.0662805	1.17861	-1.96253	0.172303	1.12686
7401	Trip4	0.28656	0.542785	1.10502	0.183885	1.13594	0.044252	1.35407	2.19576	0.284301	1.21782	0.066309	1.17843	-1.96231	0.176967	1.13051
4609	Bri3bp	0.507628	0.294455	0.67876	0.0920748	1.0659	0.117321	0.930623	1.66171	0.125032	1.09053	0.0663134	1.1784	-1.96227	0.101406	1.07282
2821	Lrrc8b	0.482731	0.316295	0.719772	0.0877097	1.06268	0.0369635	1.43223	2.28954	0.210353	1.15697	0.066338	1.17824	-1.96207	0.12913	1.09363
2600	Pitpnm3	0.798465	0.0977443	0.259913	0.0639747	1.04534	0.0505504	1.29628	2.12566	0.285368	1.21872	0.0663399	1.17822	-1.96206	0.194949	1.14468
2900	Ssh2	0.89705	0.0471831	-0.131599	0.0387222	1.0272	0.160151	0.79547	1.4778	0.0994428	1.07136	0.0663768	1.17798	-1.96176	0.101746	1.07307
3504	Ppp2r2a	0.323377	0.490291	1.02114	0.0908342	1.06499	0.0169825	1.77	2.68437	0.187824	1.13904	0.066446	1.17753	-1.96121	0.100967	1.07249
5266	Stac2	0.114101	0.942709	1.67776	0.255586	1.19382	0.0954743	1.02011	1.77919	0.218272	1.16334	0.0664654	1.1774	-1.96106	0.163261	1.11982
5880	Slc25a36	0.222539	0.652594	1.27258	0.17411	1.12827	0.147541	0.831088	1.52712	0.181268	1.13388	0.0665239	1.17702	-1.96059	0.155081	1.11348
2761	Odr4	0.36395	0.438959	0.9363	0.159717	1.11707	0.0673902	1.1714	1.97159	0.23096	1.17362	0.0665485	1.17686	-1.9604	0.157968	1.11571
2759	Unc13a	0.89852	0.046472	0.129708	0.036729	1.02579	0.0749149	1.12543	1.91386	0.162263	1.11904	0.0666166	1.17642	-1.95985	0.123536	1.0894
1912	Rps6	0.56732	0.246172	-0.584884	-0.033914	0.976767	0.177003	0.752019	1.4167	0.237988	1.17935	0.06664	1.17627	-1.95967	0.282659	1.21643
3373	Arhgef11	0.478543	0.320079	0.726792	0.100171	1.0719	0.0478834	1.31982	2.15429	0.177132	1.13063	0.0666502	1.1762	-1.95959	0.113918	1.08216
5589	Tram1	0.226416	0.645094	1.26144	0.530069	1.444	0.0816418	1.08809	1.86651	0.707256	1.6327	0.0666567	1.17616	-1.95953	0.502749	1.41691
3289	Sf1	0.435895	0.360619	0.80054	0.109183	1.07862	0.0501237	1.29996	2.13014	0.235898	1.17764	0.0666728	1.17605	-1.95941	0.152328	1.11136
4658	Lmo3	0.544756	0.263798	0.619698	0.0541171	1.03822	0.0149802	1.82448	2.74687	0.348047	1.27284	0.0666738	1.17604	-1.9594	0.188483	1.13956
188	Vps13d	0.654881	0.183838	0.456058	0.0657472	1.04663	0.12507	0.902847	1.6246	0.133695	1.0971	0.066679	1.17601	-1.95936	0.113099	1.08155
6292	Ppp6c	0.364873	0.437859	0.934449	0.107023	1.077	0.033278	1.47784	2.34378	0.232176	1.17461	0.0667058	1.17584	-1.95914	0.138013	1.10039
500	Endog	0.180833	0.742723	1.40349	0.222834	1.16702	0.0819882	1.08625	1.86417	0.227732	1.17099	0.0667082	1.17582	-1.95913	0.162081	1.1189
3654	Nudcd1	0.239626	0.620465	1.22456	0.396046	1.3159	0.0989822	1.00444	1.75884	0.528997	1.44293	0.0667212	1.17574	-1.95902	0.396548	1.31635
5508	Uba5	0.231615	0.635232	1.24673	0.11636	1.084	0.0303878	1.5173	2.39043	0.171244	1.12603	0.0668303	1.17503	-1.95816	0.0993266	1.07127
1216	Cst3	0.717278	0.144313	0.369009	0.061191	1.04333	0.0914065	1.03902	1.80364	0.205311	1.15293	0.0668354	1.17499	-1.95812	0.159219	1.11668
4939	Pgp	0.456352	0.340701	0.764633	0.211399	1.15781	0.138867	0.8574	1.56314	0.305493	1.23584	0.0668727	1.17475	-1.95782	0.260059	1.19753
718	Entpd2	0.535664	0.271107	0.633947	0.0767182	1.05462	0.186771	0.728691	1.38345	0.127447	1.09236	0.0669153	1.17447	-1.95748	0.123489	1.08937
3007	Vdac3	0.695398	0.157766	0.399163	0.0675402	1.04793	0.0757669	1.12052	1.90766	0.163598	1.12008	0.0669154	1.17447	-1.95748	0.120178	1.08687
4556	Ss18l1	0.427358	0.369208	0.81584	0.130217	1.09446	0.0839234	1.07612	1.85125	0.244368	1.18457	0.0669602	1.17418	-1.95713	0.177407	1.13085
4472	Rps6kb1	0.244672	0.611417	1.21089	0.147646	1.10776	0.28798	0.540638	1.10164	0.108445	1.07807	0.0669648	1.17415	-1.95709	0.128365	1.09305
7409	Spry2	0.225252	0.647331	1.26477	0.515643	1.42963	0.071694	1.14452	1.9379	0.729798	1.65841	0.067034	1.1737	-1.95654	0.501352	1.41554
1040	Tmem254	0.205655	0.68686	1.32298	0.367677	1.29027	0.0991499	1.00371	1.75788	0.43644	1.35326	0.0670981	1.17329	-1.95604	0.326745	1.25418
2072	Evl	0.489481	0.310264	0.708531	0.0861643	1.06154	0.03665	1.43593	2.29395	0.241358	1.1821	0.0671275	1.1731	-1.9558	0.147608	1.10773
2131	Khk	0.223601	0.650526	-1.26951	-1.0926	0.468916	0.387263	0.411994	-0.890491	-0.980443	0.506824	0.0671616	1.17288	1.95553	-1.44722	0.366728
5537	Erlec1	0.735113	0.133646	0.34469	0.0767109	1.05461	0.168899	0.772374	1.44545	0.129453	1.09388	0.067172	1.17281	-1.95545	0.124101	1.08983
2144	G3bp2	0.521067	0.283107	0.657108	0.0966179	1.06926	0.0412255	1.38483	2.23281	0.187506	1.13879	0.0672074	1.17258	-1.95517	0.117551	1.08489
5029	Bclaf1	0.549498	0.260034	0.612318	0.113823	1.08209	0.0784334	1.1055	1.88864	0.193446	1.14349	0.0672122	1.17255	-1.95513	0.140009	1.10191
3938	Sestd1	0.674692	0.170894	0.428057	0.0871883	1.0623	0.0654786	1.1839	1.98719	0.199904	1.14862	0.0672283	1.17245	-1.95501	0.141053	1.10271
5418	Scrn2	0.195299	0.709301	1.35556	0.309907	1.23963	0.0987924	1.00528	1.75992	0.297909	1.22936	0.0673424	1.17171	-1.95411	0.222627	1.16686
7671	Stxbp4	0.514678	0.288465	0.667361	0.144731	1.10552	0.445964	0.3507	0.782737	0.105843	1.07612	0.0673439	1.1717	-1.9541	0.184605	1.13651
7726	Bpnt1	0.259191	0.58638	1.17273	0.0981566	1.0704	0.0951866	1.02142	1.78089	0.19523	1.14491	0.0675048	1.17067	-1.95283	0.144376	1.10525
5278	Dync1li1	0.58747	0.231014	0.55441	0.0979947	1.07028	0.0334142	1.47607	2.34168	0.20338	1.15139	0.0675186	1.17058	-1.95272	0.123799	1.0896
2362	Vgf	0.865251	0.0628578	-0.172629	0.0275067	1.01925	0.0411181	1.38597	2.23417	0.183621	1.13573	0.0675203	1.17057	-1.95271	0.128161	1.0929
3129	Ktn1	0.550963	0.258877	0.610044	0.0979084	1.07022	0.0519146	1.28471	2.11154	0.172242	1.12681	0.0675619	1.1703	-1.95238	0.113241	1.08166
5853	Rheb	0.0366514	1.43591	2.29393	0.245799	1.18575	0.103431	0.985349	1.73392	0.206321	1.15374	0.0675723	1.17023	-1.9523	0.16401	1.1204
2577	Eif3j1	0.593734	0.226408	0.545045	0.0965699	1.06923	0.182279	0.739264	1.39856	0.157204	1.11512	0.067606	1.17001	-1.95203	0.151584	1.11079
5984	Ggt7	0.416663	0.380215	0.835287	0.159887	1.1172	0.100553	0.997603	1.74993	0.288682	1.22152	0.0676178	1.16994	-1.95194	0.219556	1.16437
3554	Trak2	0.342766	0.465002	0.979713	0.205434	1.15303	0.308169	0.511211	1.05489	0.194076	1.14399	0.0676514	1.16972	-1.95168	0.241086	1.18188
6079	Clp1	0.355707	0.448908	0.952978	0.692088	1.61562	0.0601958	1.22043	2.03254	1.57794	2.98544	0.0676732	1.16958	-1.95151	1.04649	2.0655
1594	Dvl1	0.406775	0.390646	0.853557	0.125594	1.09096	0.0666883	1.17595	1.97727	0.278967	1.21333	0.0677272	1.16924	-1.95108	0.190271	1.14098
5081	Nek9	0.0552308	1.25782	2.07861	0.107577	1.07742	0.13538	0.868445	1.57816	0.0743515	1.05289	0.0678005	1.16877	-1.95051	0.0634285	1.04495
4983	Tmem259	0.865324	0.0628215	-0.172535	0.0127389	1.00887	0.0881989	1.05454	1.82361	0.173286	1.12762	0.0679195	1.16801	-1.94958	0.144561	1.10539
2604	Slc22a23	0.420034	0.376716	0.829123	0.13935	1.10141	0.0352756	1.45253	2.31372	0.299994	1.23114	0.0681961	1.16624	-1.94742	0.180081	1.13295
3783	Ciao3	0.286368	0.543076	1.10548	0.169614	1.12476	0.165546	0.781081	1.45768	0.155282	1.11364	0.0682603	1.16583	-1.94692	0.138279	1.10059
3411	Cep170	0.435713	0.3608	0.800864	0.126371	1.09154	0.0202357	1.69388	2.59659	0.265406	1.20197	0.0682633	1.16581	-1.9469	0.146601	1.10696
877	St3gal5	0.0821367	1.08546	1.86317	1.31868	2.49438	0.124968	0.903201	1.62508	1.20741	2.30922	0.0682701	1.16577	-1.94684	0.985222	1.97962
5976	Clstn3	0.7155	0.14539	0.371445	0.0392027	1.02755	0.0303393	1.51799	2.39125	0.225792	1.16942	0.0683309	1.16538	-1.94637	0.137355	1.09989
6220	Lztr1	0.161674	0.791359	1.47206	0.180079	1.13295	0.0848439	1.07138	1.84519	0.207291	1.15452	0.0683749	1.1651	-1.94603	0.148129	1.10813
6044	Itfg1	0.187698	0.726541	1.38037	0.169196	1.12443	0.09813	1.0082	1.76372	0.163153	1.11973	0.0683833	1.16505	-1.94596	0.121244	1.08767
1370	Kif5a	0.641666	0.192691	0.474948	0.0713201	1.05068	0.0619966	1.20763	2.01669	0.190997	1.14155	0.068465	1.16453	-1.94533	0.131712	1.09559
4480	Armh4	0.390637	0.408227	0.884016	0.377728	1.29929	0.083195	1.0799	1.85608	0.691944	1.61546	0.0686241	1.16352	-1.94409	0.49593	1.41023
1737	Nadk	0.205217	0.687787	1.32434	0.19188	1.14225	0.0910243	1.04084	1.80599	0.220733	1.16533	0.0686426	1.16341	-1.94395	0.160366	1.11757
1791	Plp1	0.0709954	1.14877	1.94325	0.245146	1.18521	0.0989134	1.00474	1.75923	0.204605	1.15237	0.0686434	1.1634	-1.94394	0.155608	1.11389
6290	Rps21	0.887425	0.0518683	0.14399	0.0521961	1.03684	0.0528354	1.27707	2.10221	0.267439	1.20367	0.0686608	1.16329	-1.94381	0.185531	1.13724
3832	Fbxo10	0.385651	0.413806	0.893597	0.156707	1.11474	0.122568	0.911623	1.63636	0.208244	1.15528	0.068683	1.16315	-1.94364	0.167181	1.12286
7594	Cdh13	0.896293	0.04755	0.132573	0.0518171	1.03657	0.253624	0.595809	1.18716	0.123821	1.08962	0.0687033	1.16302	-1.94348	0.14881	1.10865
6190	Mgst3	0.29638	0.528152	1.08191	0.267194	1.20346	0.0445951	1.35071	2.19171	0.572437	1.48703	0.0687464	1.16275	-1.94315	0.353893	1.278
3229	Tpd52	0.448318	0.348414	0.778611	0.0443951	1.03125	0.018669	1.72888	2.63702	0.1685	1.12389	0.0687515	1.16272	-1.94311	0.0920409	1.06588
2421	Hs1bp3	0.311132	0.507055	1.04822	0.112135	1.08083	0.0618933	1.20836	2.01758	0.176966	1.1305	0.068767	1.16262	-1.94299	0.117188	1.08462
6064	Eif2b1	0.641835	0.192577	0.474705	0.099524	1.07142	0.0716017	1.14508	1.93861	0.188926	1.13991	0.0687984	1.16242	-1.94275	0.13459	1.09778
5580	Recql5	0.615178	0.210999	0.513359	0.140983	1.10266	0.157255	0.803396	1.48883	0.205561	1.15313	0.0690308	1.16096	-1.94095	0.185867	1.1375
2418	Ccdc127	0.260017	0.584999	1.17061	0.11185	1.08061	0.0110219	1.95775	2.89878	0.220451	1.1651	0.0690839	1.16062	-1.94054	0.111135	1.08008
1673	Ptpn5	0.111993	0.950808	1.68848	0.155608	1.11389	0.0240386	1.61909	2.50975	0.230452	1.1732	0.0690865	1.16061	-1.94052	0.128391	1.09307
512	Akap1	0.387508	0.411719	0.890018	0.0882712	1.0631	0.118719	0.925481	1.65487	0.185712	1.13738	0.0691337	1.16031	-1.94016	0.147303	1.1075
459	Pnma8b	0.284811	0.545443	1.1092	0.246521	1.18634	0.0740697	1.13036	1.92008	0.321139	1.24932	0.069272	1.15944	-1.9391	0.221043	1.16558
6718	Sun1	0.506303	0.29559	0.680913	0.125189	1.09065	0.0615188	1.21099	2.02085	0.212938	1.15905	0.0693083	1.15922	-1.93882	0.143351	1.10447
3474	Ocrl	0.581303	0.235598	0.563679	0.0785267	1.05594	0.0651808	1.18588	1.98965	0.173989	1.12817	0.0693123	1.15919	-1.93879	0.119879	1.08664
7382	Sall2	0.280349	0.5523	1.11995	0.169275	1.12449	0.184426	0.734179	1.3913	0.211922	1.15823	0.0693361	1.15904	-1.9386	0.196582	1.14598
1752	Paxbp1	0.501556	0.299681	0.688652	0.134997	1.09809	0.0709	1.14935	1.94398	0.230264	1.17305	0.0693444	1.15899	-1.93854	0.160094	1.11736
7198	Actn2	0.44399	0.352627	0.786207	0.104313	1.07498	0.155741	0.807596	1.49466	0.150138	1.10968	0.0694309	1.15845	-1.93788	0.131775	1.09564
3640	Dclk2	0.320011	0.494835	1.02851	0.141884	1.10335	0.081921	1.0866	1.86463	0.197099	1.14639	0.0694474	1.15834	-1.93775	0.139392	1.10144
1103	Rpl27a	0.997991	0.000873168	-0.00255959	0.0850247	1.06071	0.112798	0.947698	1.68437	0.216225	1.16169	0.0694498	1.15833	-1.93773	0.186867	1.13829
2268	Cdk7	0.695211	0.157883	0.399423	0.125268	1.09071	0.0948883	1.02279	1.78266	0.388897	1.30939	0.0694699	1.1582	-1.93758	0.300173	1.23129
4026	Dixdc1	0.220756	0.656087	1.27776	0.638612	1.55683	0.02809	1.55145	2.43061	1.17037	2.25069	0.0695637	1.15762	-1.93686	0.663865	1.58432
1663	Rad23b	0.217982	0.661579	1.28588	0.249137	1.1885	0.048177	1.31716	2.15107	0.348484	1.27322	0.0695679	1.15759	-1.93683	0.217349	1.1626
6314	Naa12	0.576334	0.239326	0.571184	0.0616413	1.04365	0.150474	0.822537	1.51534	0.125258	1.0907	0.0696015	1.15738	-1.93657	0.110391	1.07952
3705	Zc3h4	0.408268	0.389055	0.85078	0.109782	1.07906	0.0294006	1.53164	2.40733	0.231317	1.17391	0.0696513	1.15707	-1.93619	0.133869	1.09723
4754	Csnk1g3	0.547355	0.261731	0.615649	0.108925	1.07842	0.100483	0.997907	1.75032	0.190126	1.14086	0.0696761	1.15692	-1.936	0.145734	1.10629
6050	Gmpr2	0.0522133	1.28222	2.1085	0.186866	1.13829	0.274689	0.561159	1.13377	0.0961256	1.0689	0.0696862	1.15685	-1.93592	0.113594	1.08192
4409	Trmt2a	0.0616715	1.20992	2.01952	1.06061	2.08581	0.0458541	1.33862	2.17709	1.01387	2.01932	0.0697112	1.1567	-1.93573	0.64006	1.55839
226	Ep300	0.47109	0.326897	0.73938	0.157507	1.11536	0.056386	1.24883	2.06756	0.281563	1.21551	0.0698007	1.15614	-1.93505	0.184817	1.13667
5649	Gldc	0.686371	0.163441	0.411716	0.0756535	1.05384	0.139223	0.85629	1.56163	0.148262	1.10823	0.0698332	1.15594	-1.9348	0.12909	1.0936
789	Tmem131	0.206865	0.684312	1.31926	1.45356	2.73883	0.115767	0.936416	1.66941	1.95053	3.86517	0.0698394	1.1559	-1.93475	1.51543	2.85883
1651	Anapc1	0.279581	0.553492	1.12181	0.145718	1.10628	0.0368842	1.43316	2.29065	0.224335	1.16824	0.0698554	1.1558	-1.93463	0.133294	1.09679
1597	Acadl	0.541233	0.266616	0.625203	0.103228	1.07417	0.0963774	1.01602	1.77389	0.154938	1.11337	0.0698869	1.1556	-1.93439	0.117131	1.08458
4137	Clvs2	0.602625	0.219953	0.531841	0.104735	1.0753	0.0560166	1.25168	2.07107	0.249611	1.18889	0.0700023	1.15489	-1.93351	0.166315	1.12219
2325	Lyar	0.102041	0.991225	1.7416	0.384368	1.30529	0.0276298	1.55862	2.43903	0.467266	1.38249	0.0700088	1.15485	-1.93346	0.265616	1.20215
2343	Unc79	0.554872	0.255807	0.603995	0.149447	1.10914	0.165436	0.781369	1.45808	0.239536	1.18061	0.0700687	1.15448	-1.93301	0.217982	1.16311
6041	Adprm	0.187351	0.727344	1.38152	0.204782	1.15251	0.442363	0.354222	0.789075	0.106139	1.07634	0.0700716	1.15446	-1.93298	0.175849	1.12963
540	Numbl	0.82434	0.0838935	-0.225885	0.0191877	1.01339	0.029673	1.52764	2.40261	0.157342	1.11523	0.0701971	1.15368	-1.93203	0.10319	1.07415
4521	Smad3	0.439812	0.356733	0.793583	0.137714	1.10016	0.102636	0.988701	1.7383	0.199876	1.1486	0.0702133	1.15358	-1.93191	0.151743	1.11091
6649	Fam114a1	0.686575	0.163312	0.411431	0.125349	1.09077	0.692244	0.159741	0.403541	0.063476	1.04498	0.0702248	1.15351	-1.93182	0.228849	1.1719
7037	Tcf20	0.391491	0.407279	0.882384	0.18051	1.13328	0.137284	0.862379	1.56992	0.224499	1.16837	0.0702326	1.15346	-1.93176	0.186321	1.13786
6567	Lysmd1	0.367943	0.43422	0.928314	0.100881	1.07243	0.19783	0.703708	1.34747	0.123301	1.08922	0.0703716	1.1526	-1.93071	0.118312	1.08546
4497	Cpsf7	0.346011	0.46091	0.972944	0.127604	1.09248	0.0287386	1.54153	2.41896	0.231706	1.17422	0.070381	1.15254	-1.93064	0.132496	1.09619
5256	Flad1	0.286513	0.542856	1.10513	0.122876	1.0889	0.0476384	1.32204	2.157	0.214553	1.16034	0.070396	1.15245	-1.93052	0.133472	1.09693
6106	Gtpbp4	0.6731	0.17192	0.430294	0.146821	1.10713	0.0724966	1.13968	1.93182	0.39459	1.31457	0.0704009	1.15242	-1.93049	0.281449	1.21541
6251	Sar1b	0.662065	0.1791	0.445863	0.0960013	1.06881	0.160885	0.793483	1.47503	0.181262	1.13388	0.0704544	1.15209	-1.93008	0.16562	1.12165
2582	Nat8l	0.392528	0.40613	0.880405	0.132211	1.09597	0.105119	0.978321	1.72471	0.267042	1.20334	0.070457	1.15208	-1.93006	0.202963	1.15106
3857	Pgm2	0.323893	0.489599	1.02001	0.130627	1.09477	0.106169	0.974002	1.71904	0.169196	1.12443	0.0704917	1.15186	-1.9298	0.1282	1.09293
940	H3-5	0.427322	0.369245	0.815905	0.289176	1.22194	0.537467	0.269648	-0.631111	-0.180898	0.882154	0.0704921	1.15186	-1.9298	0.501986	1.41616
2569	Lyplal1	0.276946	0.557604	1.12823	0.108464	1.07808	0.104451	0.981087	1.72833	0.151824	1.11097	0.0705295	1.15163	-1.92951	0.114135	1.08233
1467	Slc1a2	0.620572	0.207208	0.505474	0.0848632	1.06059	0.0432552	1.36396	2.2077	0.267022	1.20332	0.0705524	1.15149	-1.92934	0.168952	1.12424
3902	Slit1	0.383115	0.416671	0.898501	0.0835247	1.0596	0.108967	0.962704	1.70418	0.160826	1.11793	0.0705561	1.15147	-1.92931	0.123414	1.08931
6418	Ndufaf1	0.501519	0.299713	0.688712	0.101213	1.07268	0.0383538	1.41619	2.27039	0.246684	1.18648	0.0705859	1.15128	-1.92909	0.150293	1.1098
2307	Aplp2	0.402556	0.395174	0.861442	0.0972173	1.06971	0.0667711	1.17541	1.9766	0.177279	1.13075	0.0706296	1.15101	-1.92876	0.119553	1.0864
86	Ddi2	0.304962	0.515754	1.06217	0.092094	1.06592	0.0205532	1.68712	2.58877	0.220422	1.16507	0.0706705	1.15076	-1.92845	0.119532	1.08638
4368	Hspa13	0.425419	0.371183	0.819342	0.0922004	1.06599	0.027992	1.55297	2.4324	0.18645	1.13796	0.070737	1.15035	-1.92795	0.106845	1.07687
4703	Sh3rf3	0.396085	0.402212	0.873642	0.281976	1.21586	0.0411177	1.38597	2.23418	0.488972	1.40344	0.070764	1.15019	-1.92774	0.298009	1.22945
5573	Satb2	0.235961	0.627159	1.23463	0.777865	1.71459	0.0364196	1.43867	2.29722	1.15691	2.22979	0.0707848	1.15006	-1.92759	0.682341	1.60474
6135	Mrpl16	0.737175	0.132429	0.341892	0.0479548	1.0338	0.110888	0.955115	1.69417	0.174169	1.12831	0.0707941	1.15	-1.92752	0.14107	1.10272
6357	Snx24	0.377769	0.422774	0.908913	0.118044	1.08526	0.198425	0.702403	1.34558	0.153016	1.11189	0.0709122	1.14928	-1.92663	0.14684	1.10714
4311	Mrps35	0.982705	0.0075767	0.0220416	0.0317813	1.02227	0.0904102	1.04378	1.80977	0.181798	1.1343	0.0709783	1.14887	-1.92613	0.145231	1.10591
2950	Tiam1	0.547449	0.261657	0.615503	0.108321	1.07797	0.0267502	1.57267	2.45551	0.261002	1.19831	0.0710654	1.14834	-1.92548	0.150448	1.10991
749	Ncf2	0.554327	0.256234	0.604837	0.201983	1.15028	0.693534	0.158932	0.401749	0.130588	1.09474	0.071108	1.14808	-1.92516	0.458668	1.37427
4458	Prkaa2	0.409964	0.387254	0.847634	0.118511	1.08561	0.0373567	1.42763	2.28406	0.25979	1.1973	0.0712795	1.14704	-1.92387	0.155554	1.11385
7506	Pex14	0.453501	0.343421	0.769575	0.112327	1.08097	0.0524267	1.28045	2.10633	0.212203	1.15846	0.0713225	1.14677	-1.92355	0.136109	1.09894
7054	Dpysl5	0.640206	0.19368	0.477045	0.0742912	1.05284	0.0511519	1.29114	2.11939	0.191163	1.14168	0.0713344	1.1467	-1.92346	0.124981	1.09049
6371	Prps2	0.228004	0.642057	1.25692	0.262559	1.1996	0.104587	0.980523	1.72759	0.408675	1.32747	0.071409	1.14625	-1.9229	0.305921	1.23621
6212	Chmp3	0.358009	0.446106	0.948292	0.0965302	1.0692	0.0230776	1.63681	2.53038	0.232909	1.1752	0.0714168	1.1462	-1.92284	0.128562	1.0932
6793	Chmp4b	0.715334	0.145491	0.371672	0.0487575	1.03437	0.0202961	1.69259	2.5951	0.208132	1.15519	0.0714637	1.14591	-1.92249	0.117759	1.08505
6528	Bcs1l	0.213432	0.670741	1.29938	0.154268	1.11286	0.0352347	1.45303	2.31432	0.249169	1.18852	0.071494	1.14573	-1.92227	0.145697	1.10627
2398	Msto1	0.383732	0.415972	0.897305	0.11441	1.08253	0.0703277	1.15287	1.9484	0.173169	1.12753	0.0716019	1.14508	-1.92146	0.117572	1.08491
4436	Heatr3	0.261983	0.581728	1.16559	0.355983	1.27986	0.259591	0.58571	1.1717	0.298586	1.22994	0.0716083	1.14504	-1.92141	0.325675	1.25325
7123	Ube3b	0.578133	0.237972	0.568462	0.112009	1.08073	0.127067	0.895968	1.61536	0.186007	1.13761	0.0716284	1.14491	-1.92126	0.152976	1.11186
4738	Mettl3	0.277135	0.557309	1.12777	0.144282	1.10518	0.0644005	1.19111	1.99617	0.196714	1.14608	0.0716558	1.14475	-1.92106	0.129797	1.09414
4283	Cstf2	0.448641	0.348101	0.778047	0.108389	1.07802	0.13762	0.861318	1.56848	0.139393	1.10144	0.0717301	1.1443	-1.92051	0.115812	1.08358
4783	Mmaa	0.425469	0.371132	0.819251	0.160256	1.11749	0.073206	1.13545	1.9265	0.236836	1.17841	0.071802	1.14386	-1.91997	0.162918	1.11955
7117	Mkrn2	0.744062	0.128391	0.332568	0.0956992	1.06858	0.192824	0.71484	1.36355	0.145882	1.10641	0.0718044	1.14385	-1.91995	0.145266	1.10593
4699	Sipa1l1	0.700112	0.154832	0.392635	0.053475	1.03776	0.0633563	1.19821	2.00499	0.16492	1.1211	0.0718888	1.14334	-1.91933	0.113718	1.08201
5135	Ipo11	0.344056	0.463371	0.977017	0.134556	1.09775	0.160491	0.79455	1.47651	0.199502	1.1483	0.0719085	1.14322	-1.91918	0.173632	1.12789
1686	Cdh11	0.929999	0.0315173	0.0893326	0.0439294	1.03092	0.126184	0.898996	1.61943	0.195533	1.14515	0.0719468	1.14299	-1.91889	0.170657	1.12557
2613	Mtcl1	0.636961	0.195887	0.481715	0.0995903	1.07147	0.0823702	1.08423	1.8616	0.219592	1.1644	0.071953	1.14295	-1.91885	0.159868	1.11718
7119	Ube4b	0.756672	0.121092	0.315576	0.065521	1.04646	0.0187396	1.72724	2.63513	0.228086	1.17128	0.0719591	1.14291	-1.9188	0.128197	1.09293
909	Itm2b	0.217706	0.662129	1.28669	0.158809	1.11637	0.0434272	1.36224	2.20562	0.224924	1.16872	0.0720376	1.14244	-1.91822	0.136323	1.0991
7545	Ak1	0.920807	0.0358314	0.101104	0.0469187	1.03306	0.0674752	1.17086	1.97091	0.160746	1.11787	0.0720386	1.14243	-1.91821	0.11689	1.0844
7091	Tfip11	0.431755	0.364762	0.807935	0.115057	1.08302	0.0442779	1.35381	2.19545	0.204018	1.1519	0.0720697	1.14225	-1.91798	0.125918	1.0912
3089	Ctnna2	0.978672	0.00936266	-0.0271827	0.040029	1.02813	0.100662	0.997137	1.74932	0.170896	1.12576	0.0721298	1.14189	-1.91754	0.141344	1.10293
7607	Cul1	0.405959	0.391518	0.855078	0.0856269	1.06115	0.0513327	1.28961	2.11752	0.155941	1.11415	0.0721314	1.14188	-1.91753	0.0987964	1.07088
2323	Tle3	0.206987	0.684058	1.31889	0.293877	1.22593	0.170916	0.767217	1.43819	0.280079	1.21426	0.0721734	1.14162	-1.91721	0.248479	1.18795
2073	Nherf1	0.456273	0.340775	0.76477	0.147252	1.10746	0.135673	0.867508	1.57689	0.225958	1.16955	0.0722168	1.14136	-1.91689	0.186588	1.13807
7419	Naa10	0.115432	0.937672	1.67108	0.353956	1.27806	0.0340577	1.46779	2.33185	0.432685	1.34974	0.0722968	1.14088	-1.9163	0.252177	1.191
5192	Wdr33	0.370102	0.431679	0.924021	0.149352	1.10907	0.254027	0.59512	1.18611	0.184699	1.13658	0.0724011	1.14025	-1.91553	0.199787	1.14853
5995	Gorasp2	0.756167	0.121382	0.316255	0.0913936	1.0654	0.160886	0.793481	1.47502	0.156837	1.11484	0.0724511	1.13995	-1.91516	0.144409	1.10528
4642	Parp12	0.62016	0.207496	0.506075	0.143882	1.10487	0.178311	0.748821	1.41216	0.248823	1.18824	0.0725493	1.13937	-1.91444	0.233464	1.17565
177	Dennd4c	0.675016	0.170686	0.427602	0.118065	1.08528	0.224595	0.648601	1.26665	0.225273	1.169	0.0725923	1.13911	-1.91412	0.237732	1.17914
2541	Fam117b	0.715657	0.145295	0.37123	0.0663425	1.04706	0.116726	0.932834	1.66465	0.137736	1.10018	0.0726571	1.13872	-1.91364	0.112074	1.08078
2661	Zbtb16	0.504908	0.296788	0.683183	0.102682	1.07377	0.231299	0.635826	1.24761	0.156688	1.11472	0.0727753	1.13802	-1.91277	0.16335	1.11988
5916	Camk2g	0.767558	0.114889	-0.300985	-0.0284126	0.980499	0.332172	0.478638	1.00213	0.11591	1.08366	0.0727918	1.13792	-1.91265	0.178515	1.13172
4684	Cep68	0.642566	0.192083	0.473656	0.298796	1.23012	0.293854	0.531868	1.0878	0.46495	1.38027	0.0728205	1.13775	-1.91244	0.569833	1.48435
2498	Arsg	0.155499	0.808273	1.4956	0.393547	1.31362	0.361448	0.441955	0.941334	0.218142	1.16323	0.072884	1.13737	-1.91198	0.297553	1.22906
207	Triqk	0.288178	0.54034	1.10117	0.401618	1.32099	0.160089	0.795639	1.47803	0.45588	1.37162	0.0728907	1.13733	-1.91193	0.393424	1.31351
4032	Supv3l1	0.689787	0.161285	0.406958	0.0688687	1.04889	0.0455209	1.34179	2.18092	0.175269	1.12918	0.0729297	1.1371	-1.91164	0.112071	1.08078
2062	Rasgrf2	0.735895	0.133184	0.343628	0.0633894	1.04492	0.0310415	1.50806	2.37952	0.186357	1.13789	0.072945	1.137	-1.91153	0.112072	1.08078
[truncated: 5,860 more rows]

## Sheet: active_placebo_top20
sorted after foldchange
decrease		fc<1	p-value		increase		fc≥1	p-value
1	Cisd3	0,205775549	0,00400955		1	Igkv2-109	2.31704	0,01622998
2	KRT72	0,307635508	0,026565108		2	Srcap	1.81099	0,017775269
3	Akap6	0,325432409	0,048675027		3	Adrm1b	1.09673	0,004895957
4	Pdlim3	0,312084382	0,041812781		4	Gm8797	1.25063	0,000441036
5	Sox10	0,494326815	0,035874273		5	Frmpd3	1.17347	0,022585824
6	Ube2z	0,830302493	0,047326927		6	Rpl9-ps6	1.24047	0,02525229
7	Tfe3	0,454700548	0,048598126		7	Ighg3	5.39154	0,026963547
8	Paqr9	0,851747013	0,036254609		8	Mlh3	2.56438	0,046305518
9	Taf5	0,268352261	0,028066636		9	Neb	1.14617	0,029682061
10	Ccdc134	0,42235753	0,040174411		10	Rapgef1	1.17152	0,009863023
11	Lzts2	0,477925794	0,003526784		11	H1f10	2.23732	0,008582233
12	Lpin1	0,416792541	0,014346568		12	Dhx8	1.39416	0,019825877
13	Dipk1b	0,423425209	0,031683994		13	Bptf	1.28378	0,003229944
14	Slc35a2	0,433341035	0,035408666		14	Tanc2	1.11279	0,025314664
					15	Osbpl7	1.17493	0,010885386
					16	Chd5	1.13469	0,038107948
					17	Sh3pxd2b	1.17484	0,003102926
					18	Ndufaf6	1.23011	0,008894486
					19	Virma	1.1745	0,045173987
					20	Map7d1	1.13766	0,014421554
sorted after p-value
decrease		fc<1	p-value		increase		fc≥1	p-value
1	Lzts2	0,477925794	0,003526784		1	Ypel5	1.58225	1.09784
2	Cisd3	0,205775549	0,00400955		2	Ccdc28a	1.41781	1.51652
3	Lpin1	0,416792541	0,014346568		3	Lmf1	1.46685	4.14771
4	KRT72	0,307635508	0,026565108		4	Ppp3cc	1.3506	0,000149274
5	Taf5	0,268352261	0,028066636		5	Tmt1a	1.51071	0,000173334
6	Dipk1b	0,423425209	0,031683994		6	Pus7	1.15668	0,000240734
7	Slc35a2	0,433341035	0,035408666		7	Hykk	1.17203	0,000240861
8	Sox10	0,494326815	0,035874273		8	Pex7	1.37117	0,000294194
9	Paqr9	0,851747013	0,036254609		9	Cd81	1.42237	0,000324683
10	Ccdc134	0,42235753	0,040174411		10	Phactr3	1.18784	0,000338553
11	Pdlim3	0,312084382	0,041812781		11	Nr2c2	1.36391	0,000359646
12	Ube2z	0,830302493	0,047326927		12	Tia1	1.17549	0,000387997
13	Tfe3	0,454700548	0,048598126		13	Gm8797	1.25063	0,000441036
14	Akap6	0,325432409	0,048675027		14	mt-Co3	1.36679	0,000494332
					15	Echdc2	1.15195	0,000534749
					16	Usp21	1.25658	0,000542549
					17	Yipf3	1.19201	0,000553469
					18	Ap3s2	1.23078	0,000584587
					19	Ccdc50	1.13559	0,000687065
					20	Trip11	1.31848	0,00068751
